# Supplementary material
Source: publisher figshare collection journal article supplement (https://acs.figshare.com/ndownloader/files/21296676)
Supplement: Supplementary file 1 [file 21296676]

# Supporting Information

## Ac<sub>2</sub>O-Mediated Dearylacetylation Dimerization of 2-Arylacetyl-1-naphthols. Synthesis of Naphtho[1,2-*b*]furan-3-ones

Meng-Yang Chang,<sup>\*a,b</sup> Kuan-Ting Chen,<sup>a</sup> Yu-Ting Hsiao<sup>a</sup> and Shin-Mei Chen<sup>a</sup>

<sup>a</sup>Department of Medicinal and Applied Chemistry, Kaohsiung Medical University, Kaohsiung 807, Taiwan

<sup>b</sup>Department of Medical Research, Kaohsiung Medical University Hospital, Kaohsiung 807, Taiwan

\*Corresponding authors: [mychang@kmu.edu.tw](mailto:mychang@kmu.edu.tw)

### Table of Contents

|                                                                                          |             |
|------------------------------------------------------------------------------------------|-------------|
| 1. <sup>1</sup> H NMR and <sup>13</sup> C NMR spectra copies of compounds <b>3a-3q</b>   | S-2~S-41    |
| 2. <sup>1</sup> H NMR and <sup>13</sup> C NMR spectra copies of compounds <b>4a-4q</b>   | S-42~S-82   |
| 3. <sup>1</sup> H NMR and <sup>13</sup> C NMR spectra copies of compounds <b>5a-5l</b>   | S-83~S-120  |
| 4. <sup>1</sup> H NMR and <sup>13</sup> C NMR spectra copies of compounds <b>6m-6p</b>   | S-121~S-133 |
| 5. <sup>1</sup> H NMR and <sup>13</sup> C NMR spectra copies of compounds <b>8a-8f</b>   | S-134~S-145 |
| 6. <sup>1</sup> H NMR and <sup>13</sup> C NMR spectra copies of compounds <b>9a-9e</b>   | S-146~S-156 |
| 7. <sup>1</sup> H NMR and <sup>13</sup> C NMR spectra copies of compounds <b>10a-10c</b> | S-157~S-165 |
| 8. <sup>1</sup> H NMR and <sup>13</sup> C NMR spectra copies of compound <b>12</b>       | S-166~S-168 |
| 9. X-ray crystal data of compounds <b>4e, 4h, 5a, 5g</b> and <b>9d</b>                   | S-169~S-178 |

# Compound 3a (<sup>1</sup>H-NMR spectral data)

YTN1H

Pulse Sequence: s2pu1  
UNITYplus-400 "unity400"  
Date: Dec 14 2017  
Solvent: CDCl<sub>3</sub>  
Ambient temperature  
Total 32 repetitions

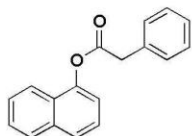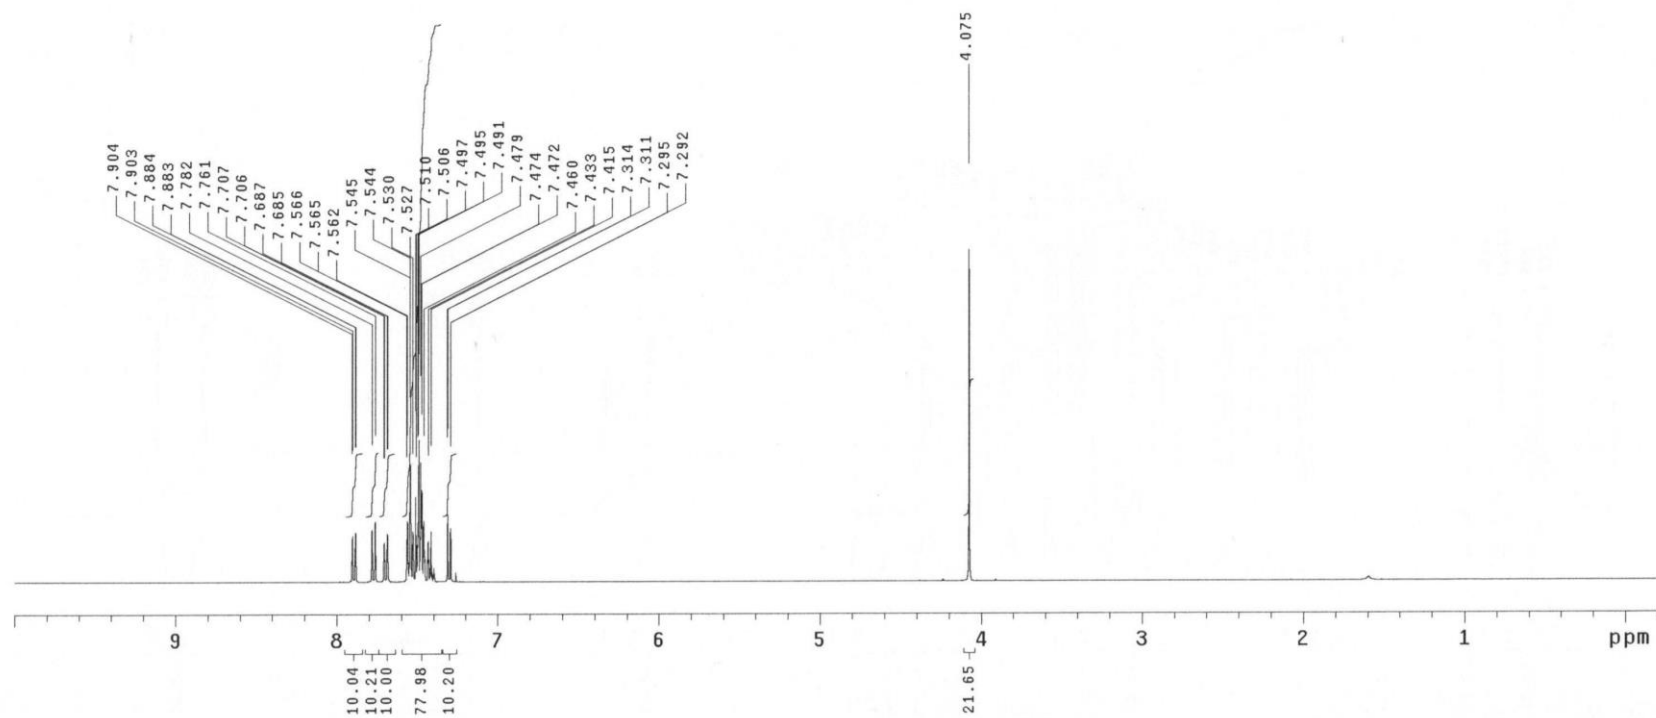

# Compound 3a (<sup>13</sup>C-NMR spectral data)

YTN1H

Pulse Sequence: s2pu1  
UNITYplus-400 "unity400"  
Date: Dec 14 2017  
Solvent: CDCl<sub>3</sub>  
Ambient temperature  
Total 256 repetitions

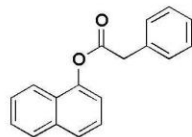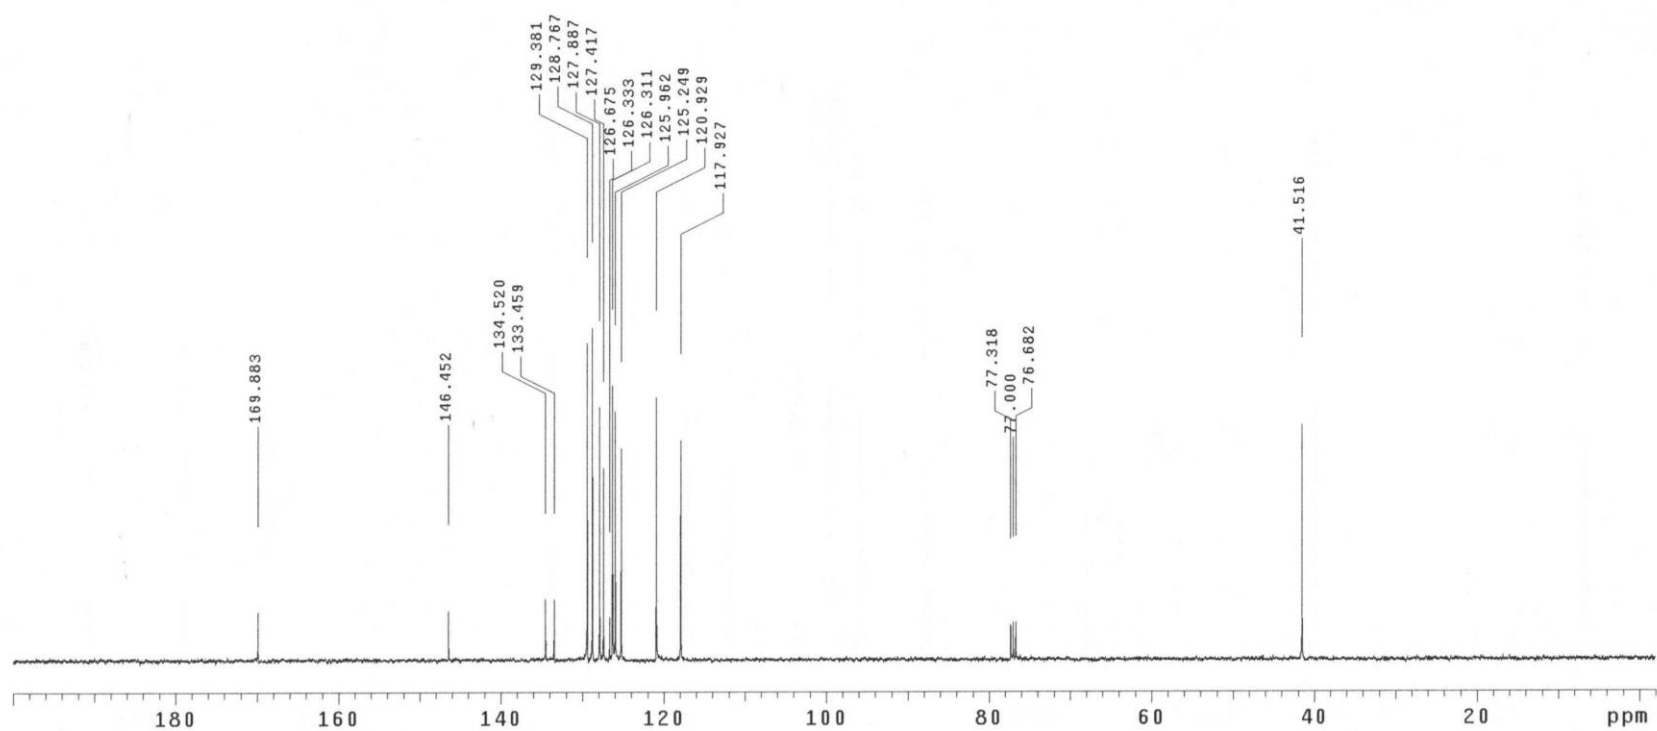

# Compound 3b (<sup>1</sup>H-NMR spectral data)

YTN102

Pulse Sequence: s2pu1  
 UNITYplus-400 "unity400"  
 Date: Dec 19 2017  
 Solvent: CDCl<sub>3</sub>  
 Ambient temperature  
 Total 32 repetitions

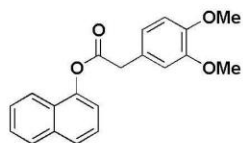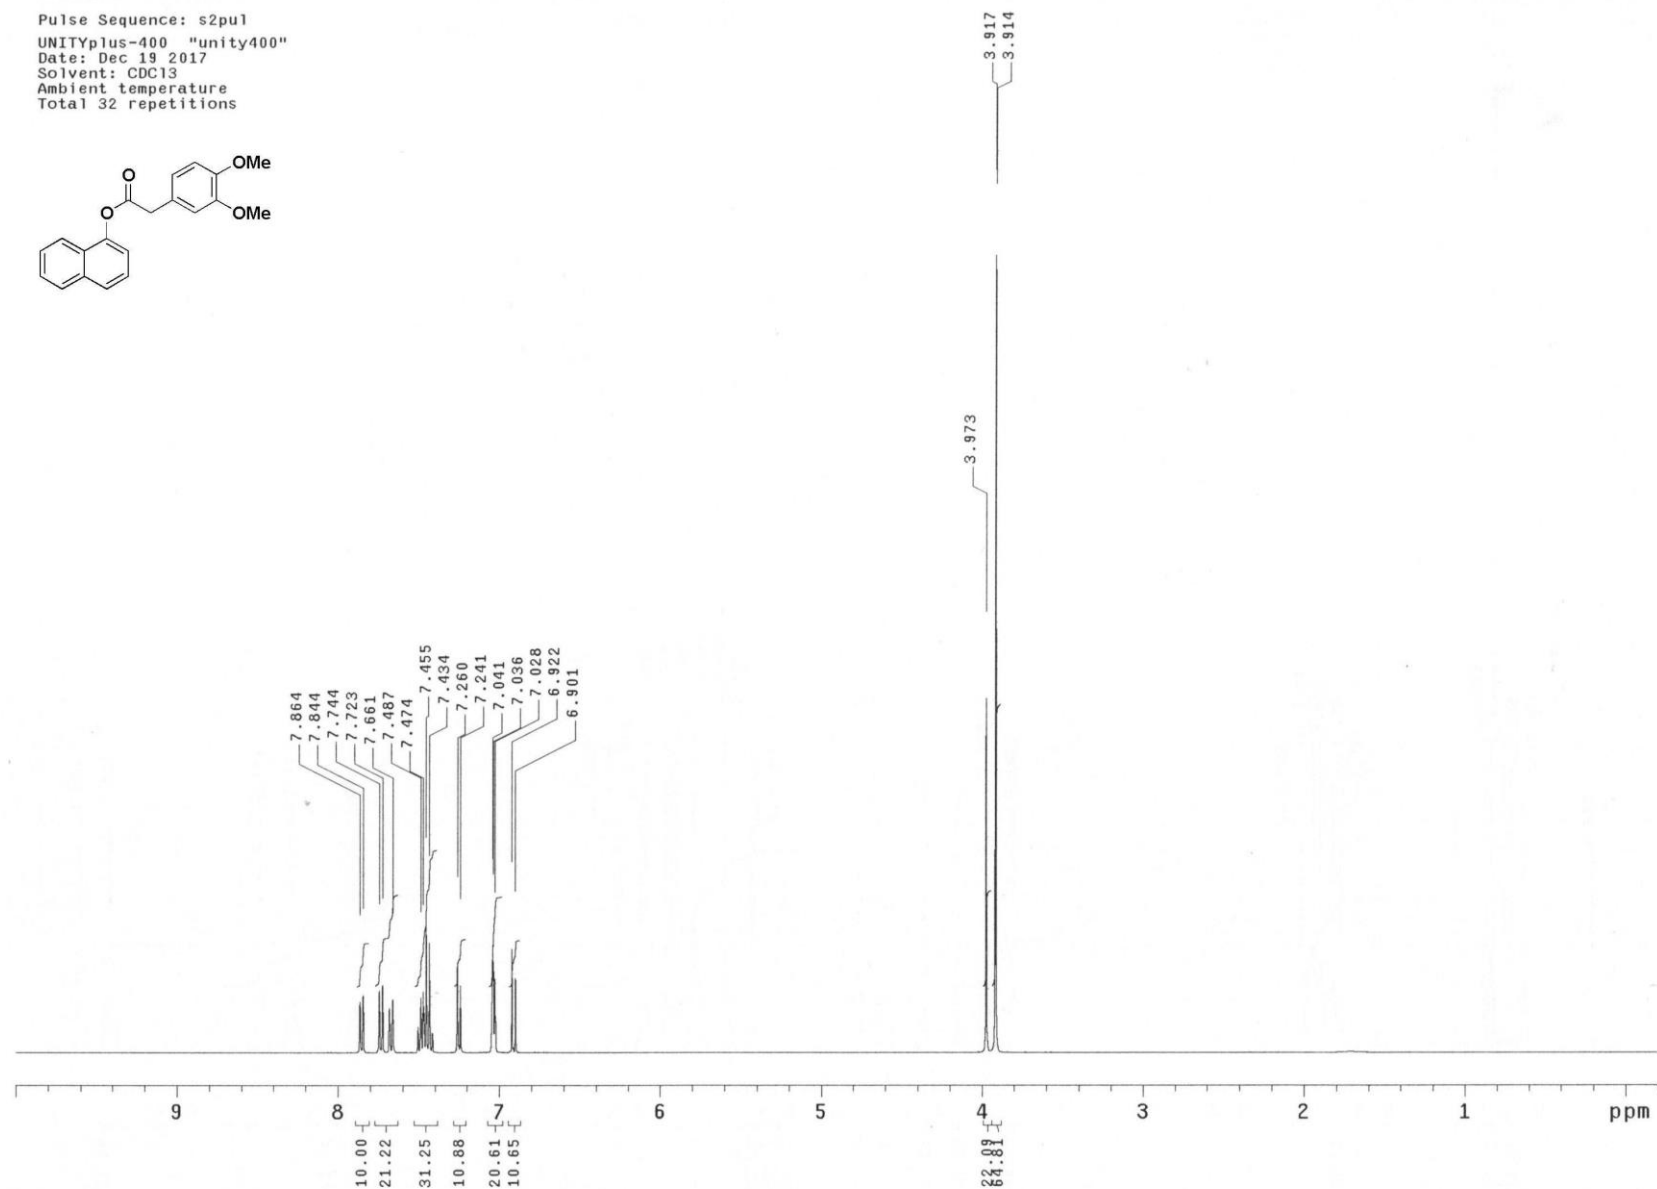



# Compound 3b (<sup>13</sup>C-NMR spectral data)

YTN102

Pulse Sequence: s2pu1  
UNITYplus-400 "unity400"  
Date: Dec 19 2017  
Solvent: CDCl<sub>3</sub>  
Ambient temperature  
Total 480 repetitions

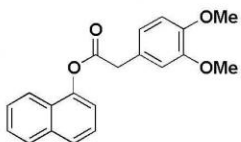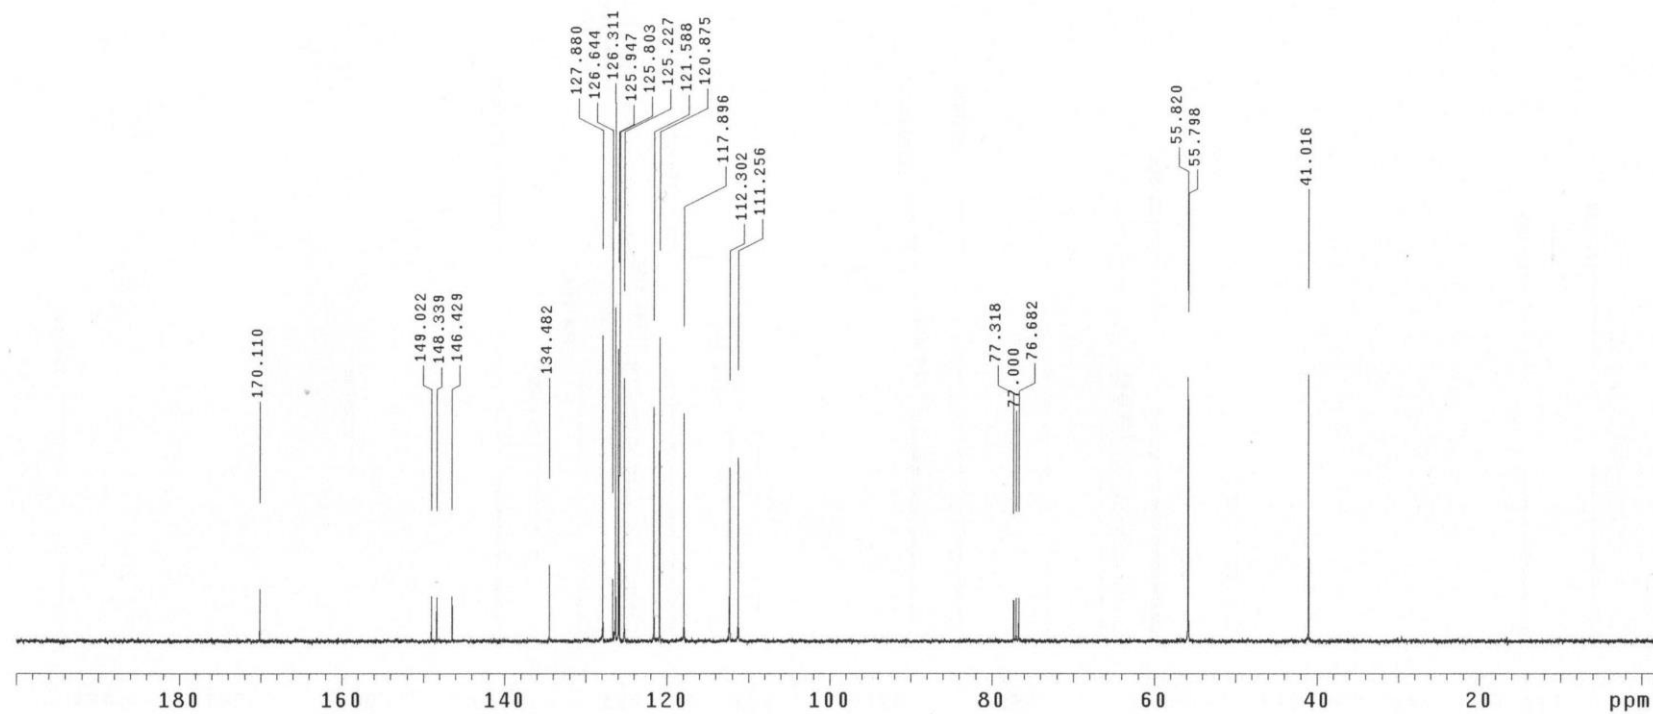

# Compound 3c (<sup>1</sup>H-NMR spectral data)

YTN4F

Pulse Sequence: s2pu1

UNITYplus-400 "unity400"

Date: Jan 3 2018

Solvent: CDCl<sub>3</sub>

Ambient temperature

Total 32 repetitions

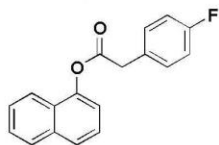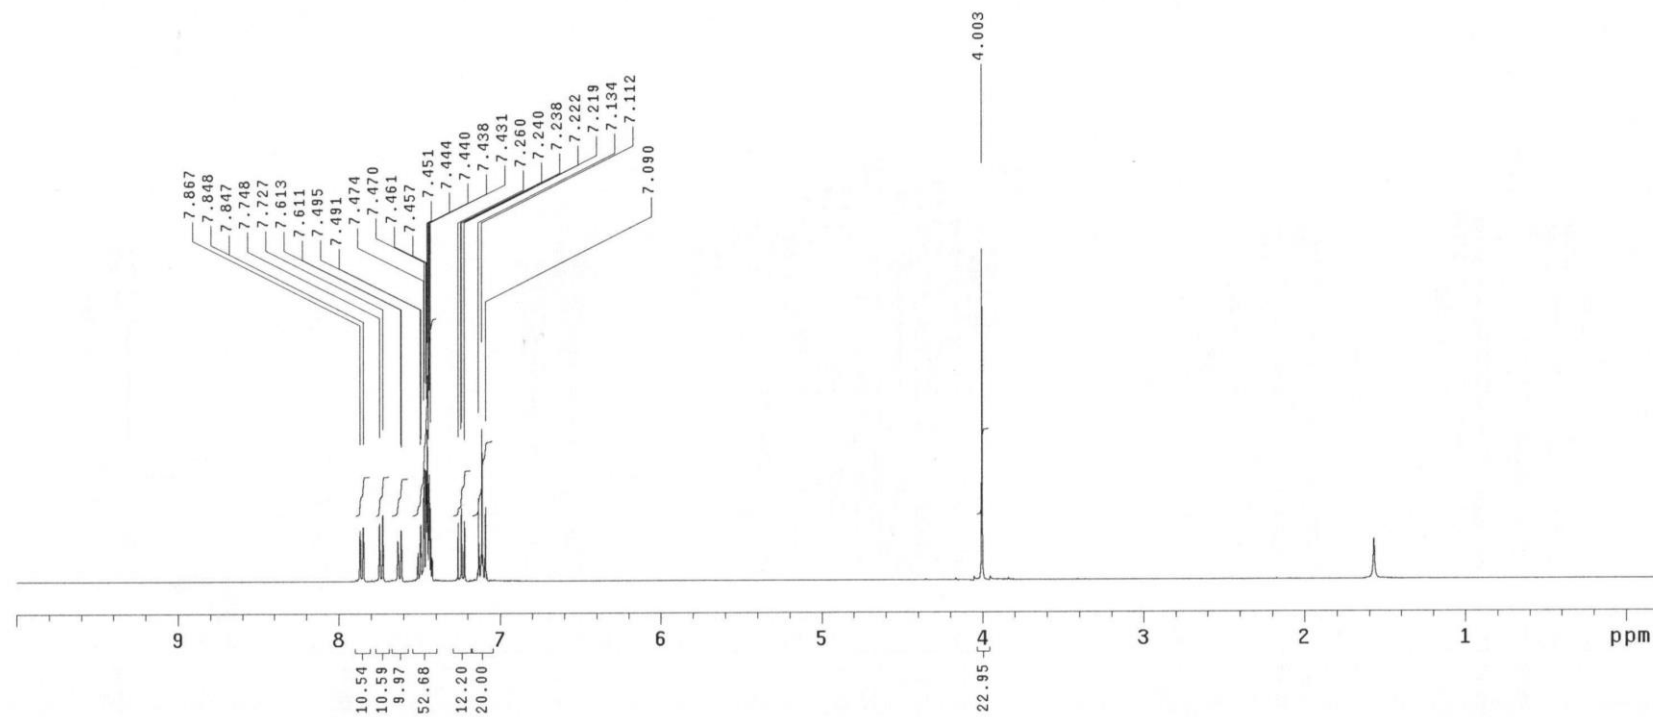

# Compound 3c (<sup>13</sup>C-NMR spectral data)

YTN4F

Pulse Sequence: s2pu1  
UNITYplus-400 "unity400"  
Date: Jan 3 2018  
Solvent: CDCl<sub>3</sub>  
Ambient temperature  
Total 3280 repetitions

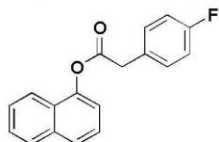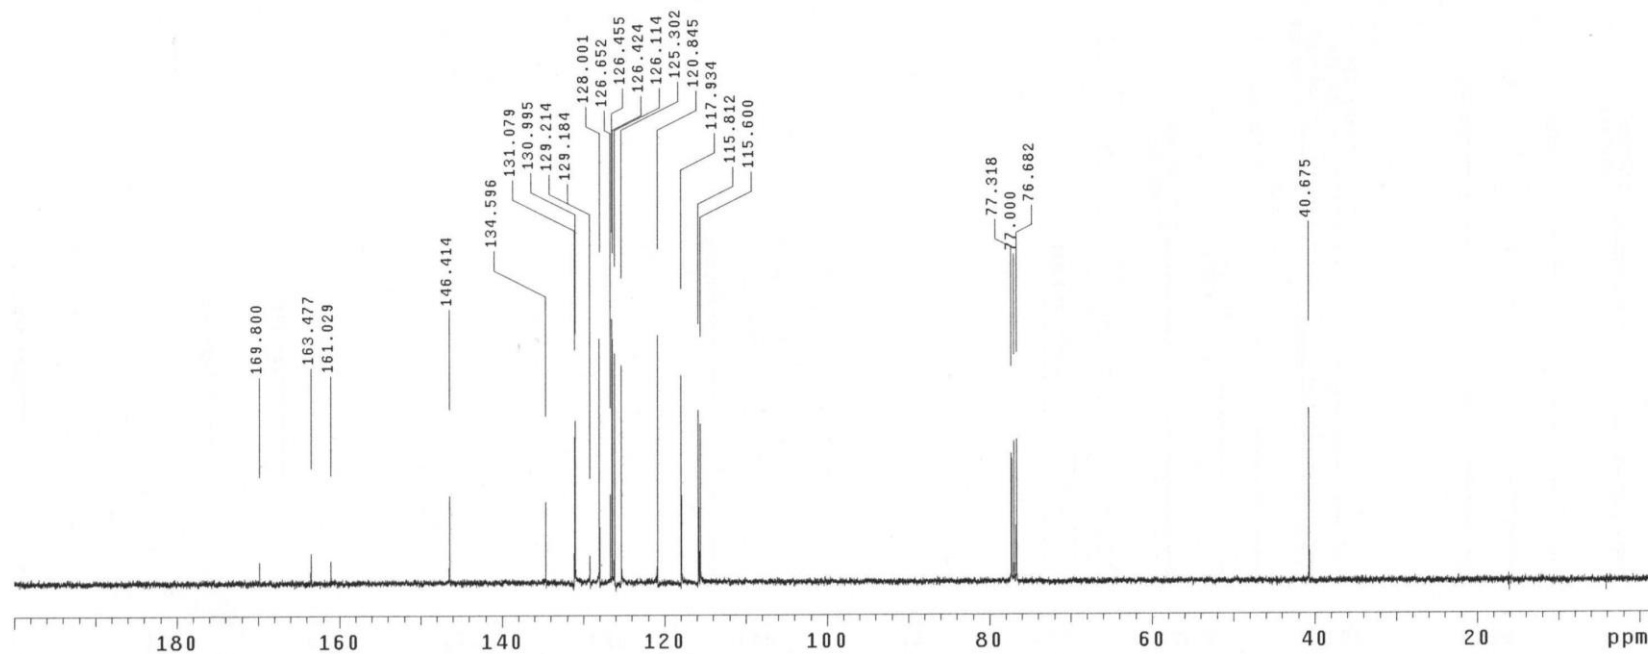

# Compound 3d (<sup>1</sup>H-NMR spectral data)

YTN4MeH

Pulse Sequence: s2pu1

UNITYplus-400 "unity400"

Date: Jan 12 2018

Solvent: CDCl<sub>3</sub>

Ambient temperature

Total 32 repetitions

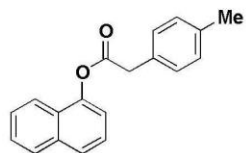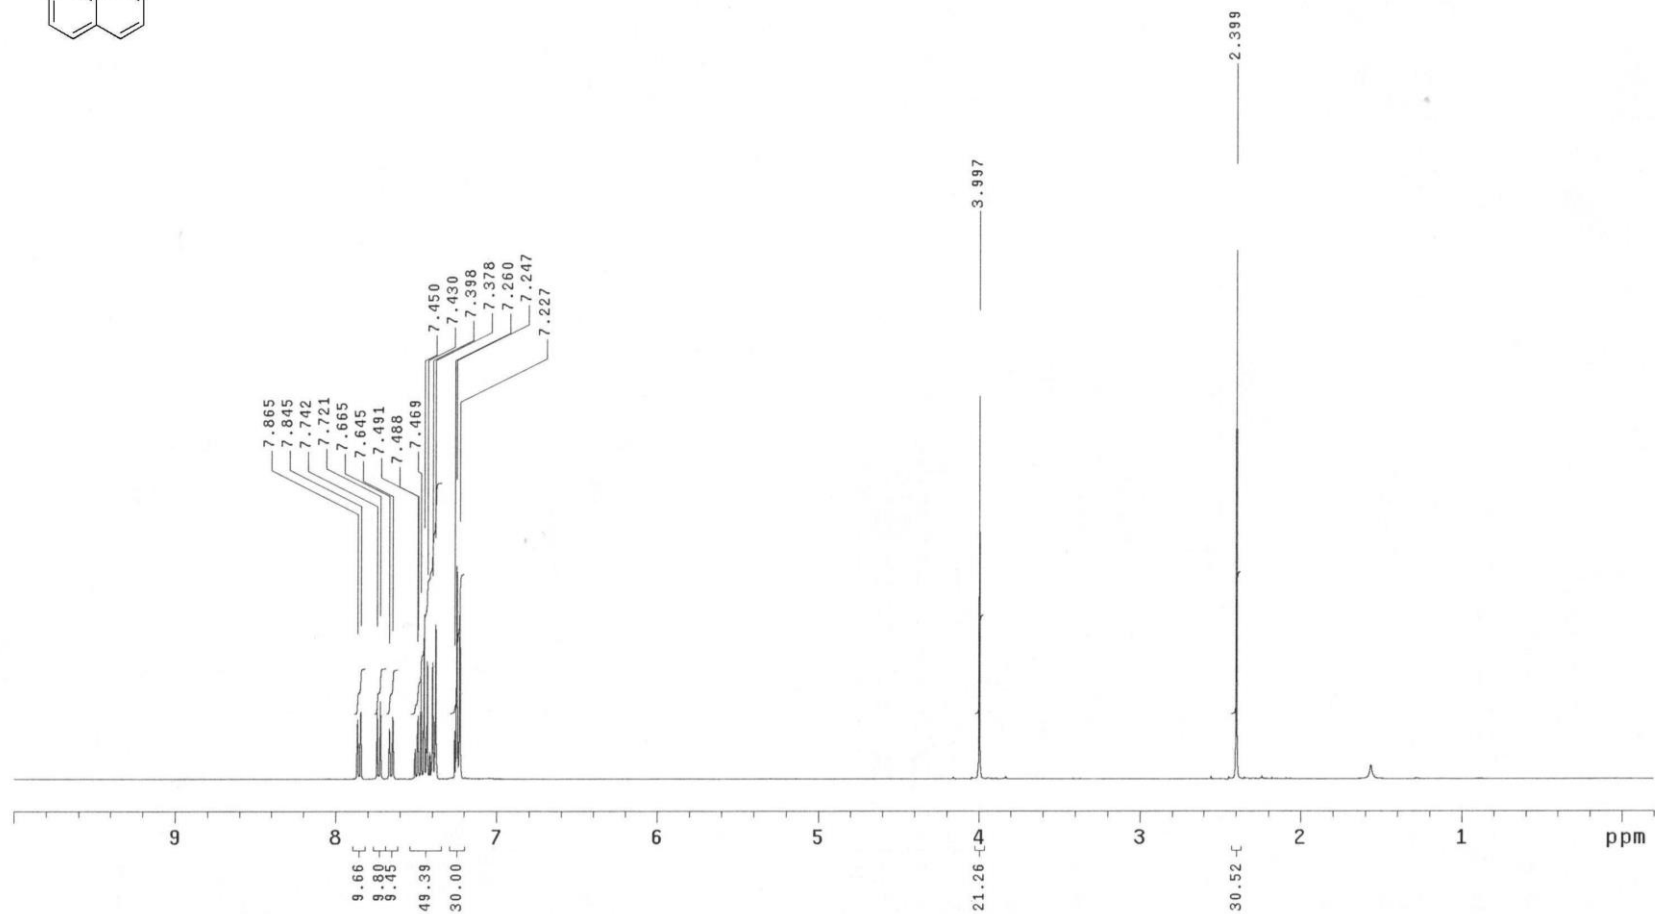

# Compound 3d (<sup>13</sup>C-NMR spectral data)

YTN4MeH

Pulse Sequence: s2pu1

UNITYplus-400 "unity400"

Date: Jan 12 2018

Solvent: CDCl<sub>3</sub>

Ambient temperature

Total 848 repetitions

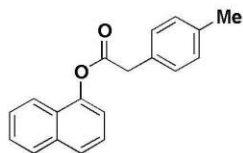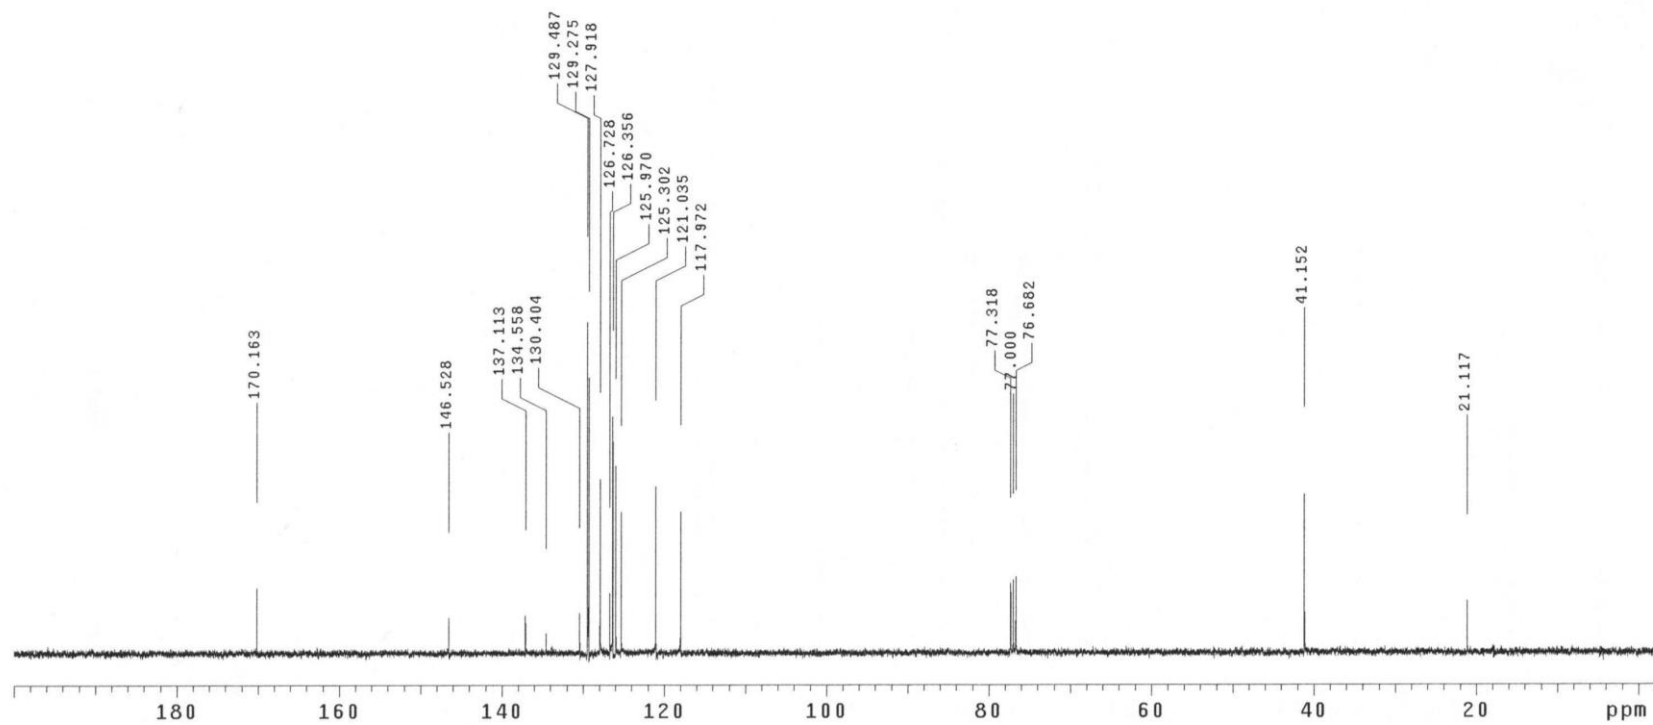

# Compound 3e (<sup>1</sup>H-NMR spectral data-1)

YTNPhPh

Pulse Sequence: s2pu1  
UNITYplus-400 "unity400"  
Date: Mar 16 2018  
Solvent: CDCl<sub>3</sub>  
Ambient temperature  
Total 32 repetitions

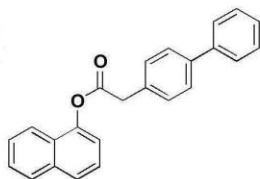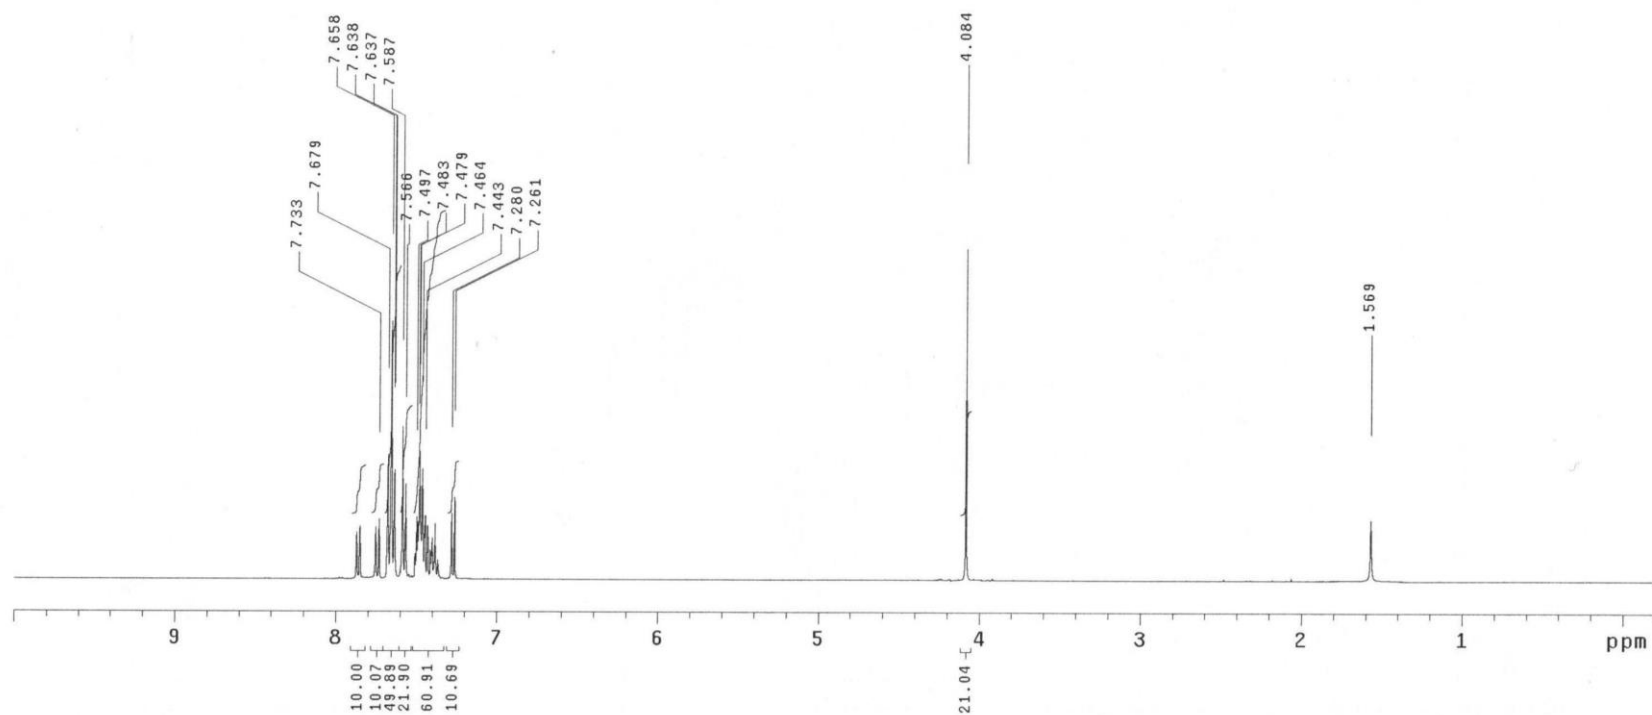

# Compound 3e (<sup>1</sup>H-NMR spectral data-2)

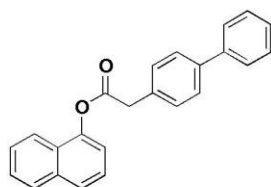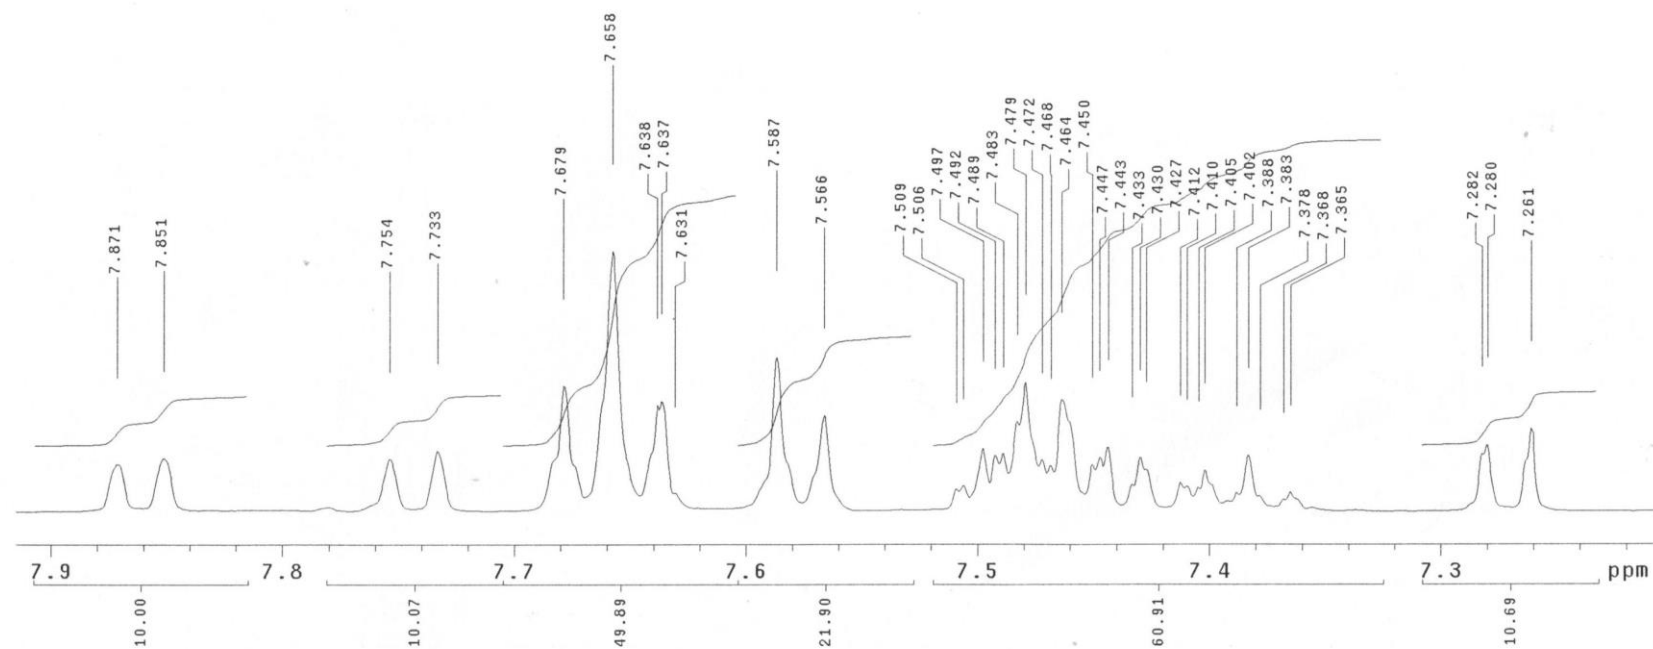

# Compound 3e (<sup>13</sup>C-NMR spectral data)

YTNPhPh

Pulse Sequence: s2pu1  
UNITYplus-400 "unity400"  
Date: Mar 16 2018  
Solvent: CDCl<sub>3</sub>  
Ambient temperature  
Total 2432 repetitions

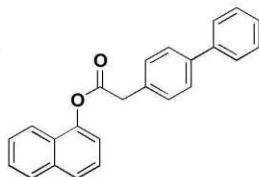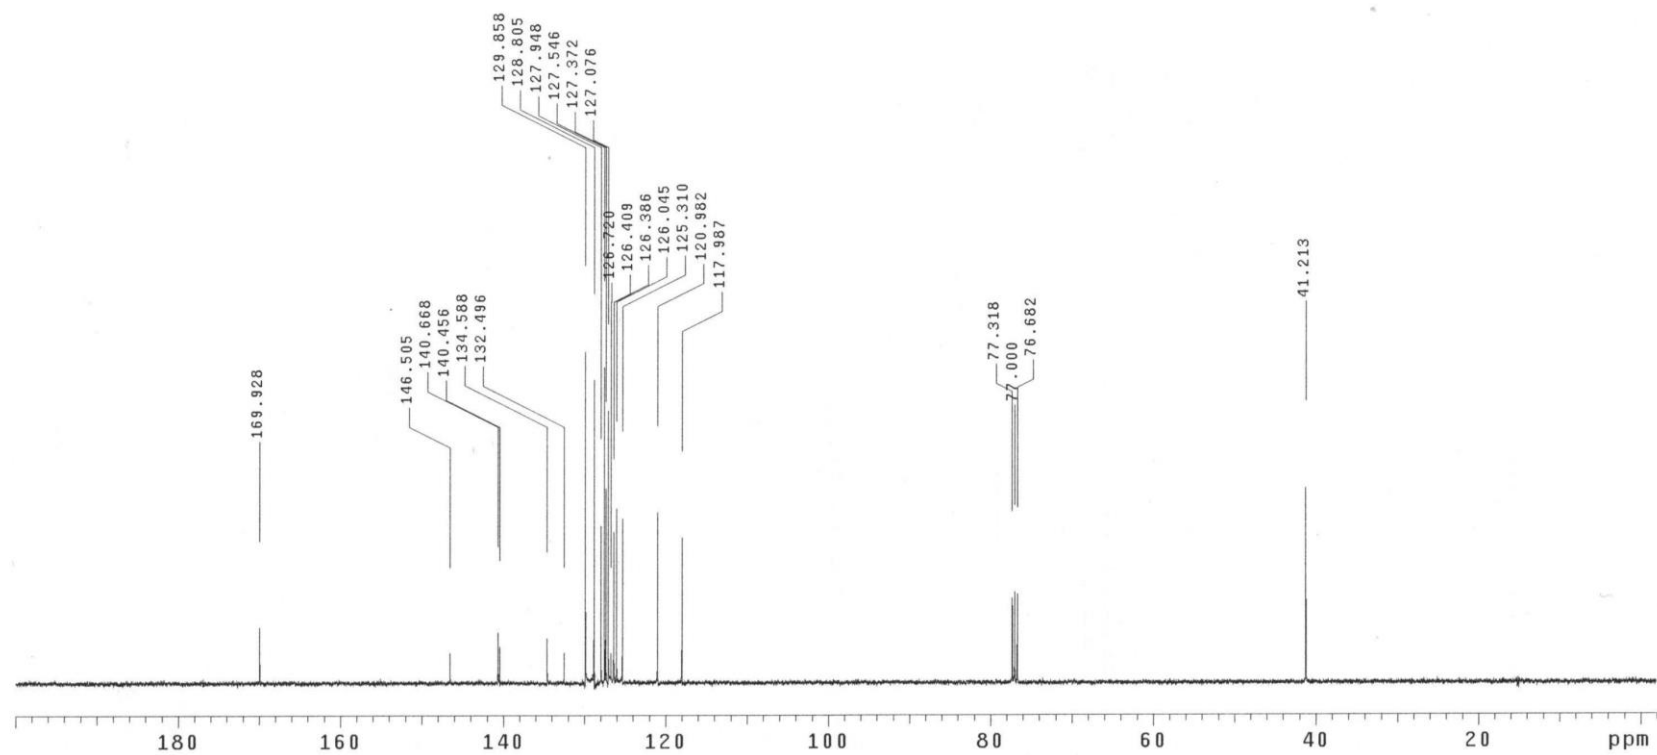



# Compound 3f (<sup>1</sup>H-NMR spectral data)

YTN02H

Pulse Sequence: s2pul  
 UNITYplus-400 "unity400"  
 Date: Mar 28 2018  
 Solvent: CDCl<sub>3</sub>  
 Ambient temperature  
 Total 32 repetitions

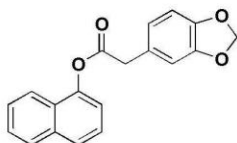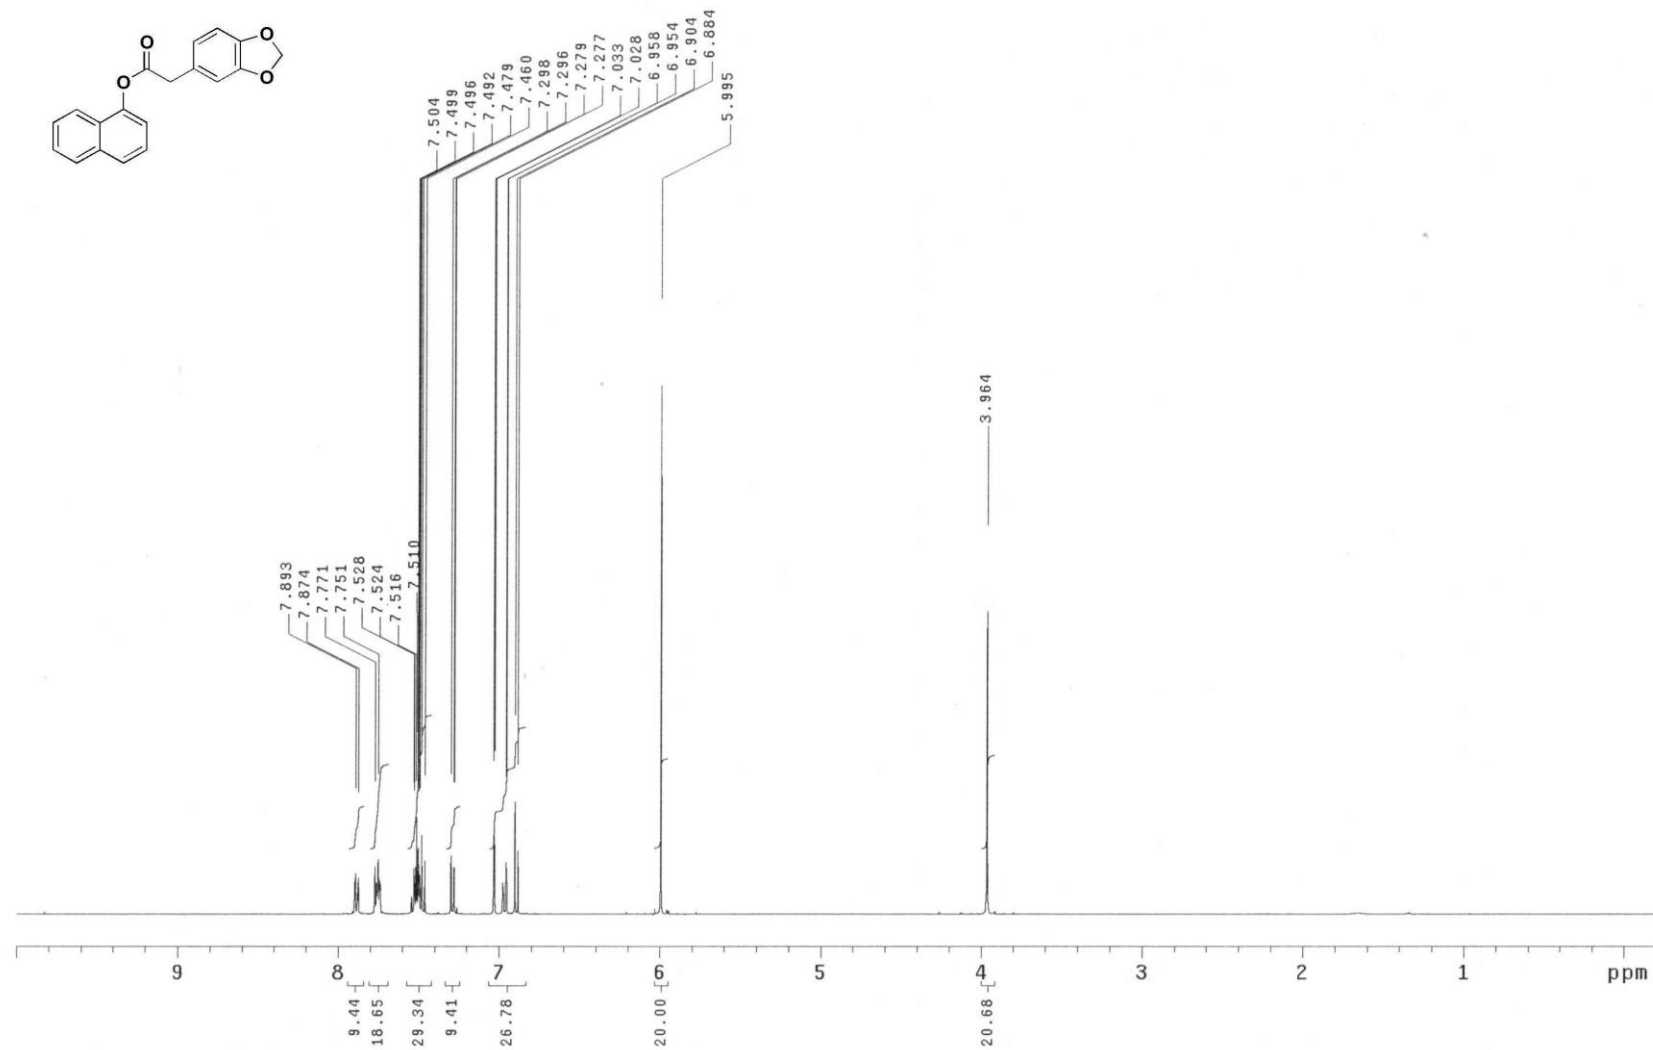

# Compound 3f ( $^{13}\text{C}$ -NMR spectral data)

YTN02H

Pulse Sequence: s2pu1  
UNITYplus-400 "unity400"  
Date: Mar 28 2018  
Solvent: CDCl<sub>3</sub>  
Ambient temperature  
Total 128 repetitions

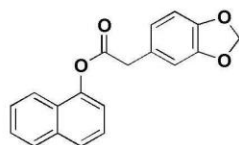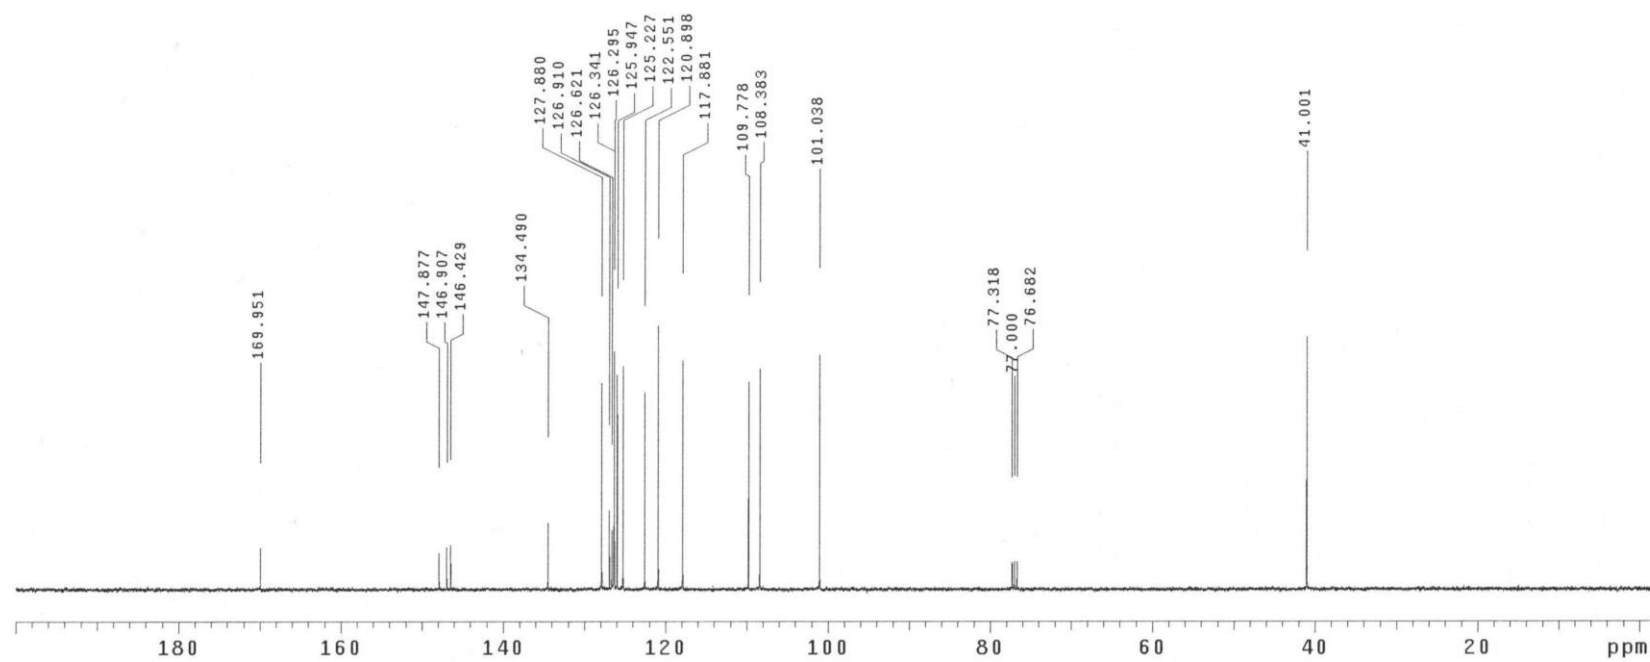

# Compound 3g (<sup>1</sup>H-NMR spectral data)

SHPPAS

Pulse Sequence: s2pu1

UNITYplus-400 "unity400"

Date: Apr 12 2018

Solvent: CDCl<sub>3</sub>

Ambient temperature

Total 32 repetitions

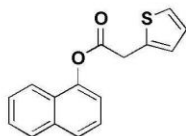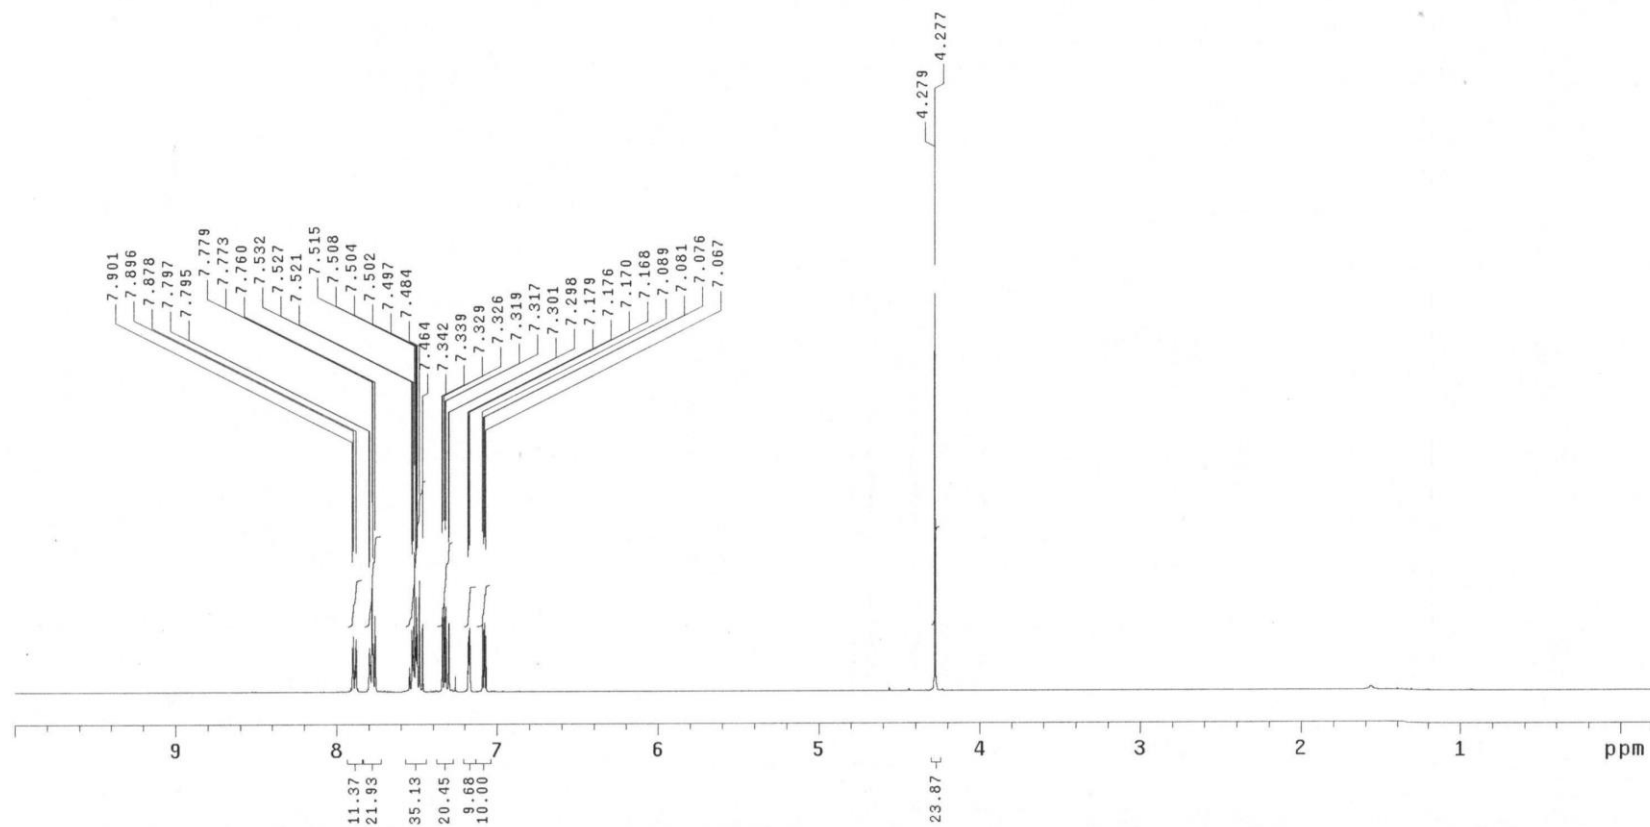

# Compound 3g (<sup>13</sup>C-NMR spectral data)

SHPPAS

Pulse Sequence: s2pu1  
UNITYplus-400 "unity400"  
Date: Apr 12 2018  
Solvent: CDCl<sub>3</sub>  
Ambient temperature  
Total 736 repetitions

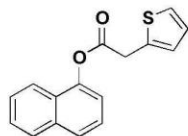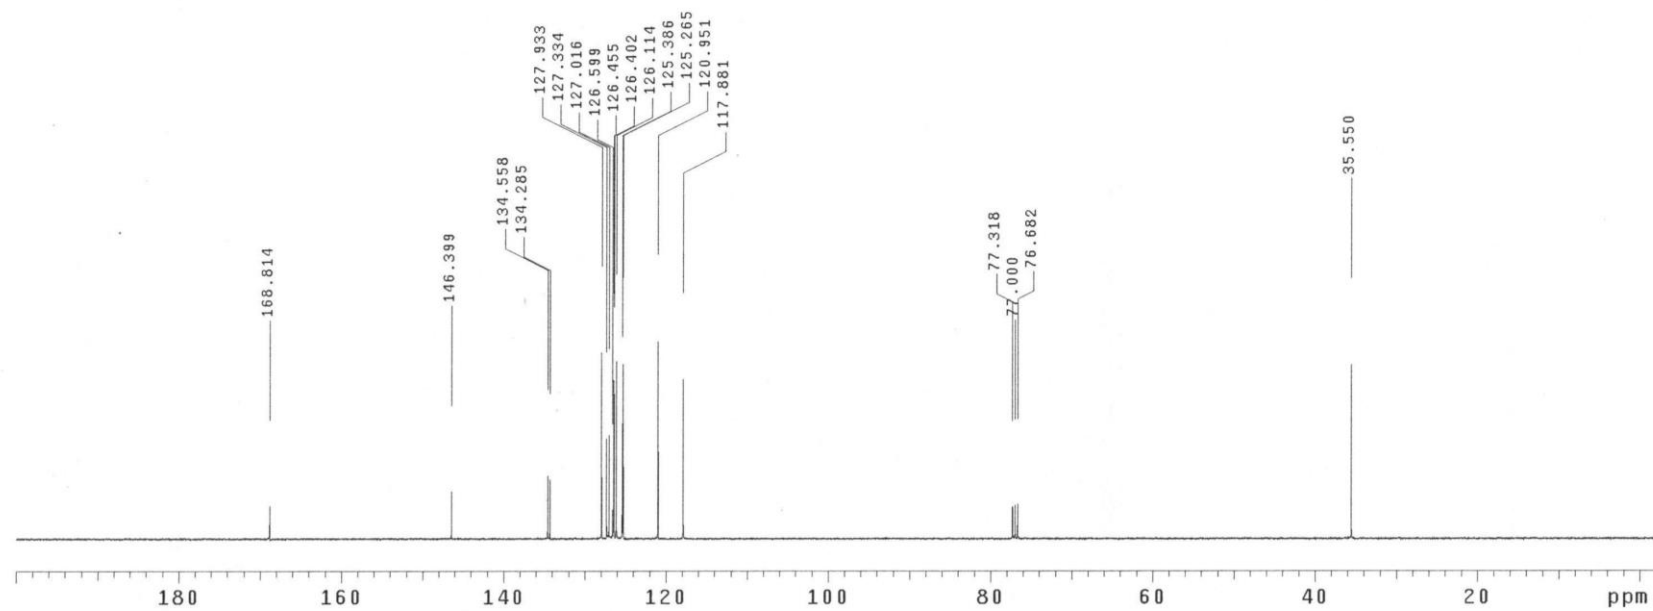

# Compound 3h (<sup>1</sup>H-NMR spectral data-1)

YT1070409

Pulse Sequence: s2pu1

UNITYplus-400 "unity400"

Date: Apr 10 2018

Solvent: CDCl<sub>3</sub>

Ambient temperature

Total 32 repetitions

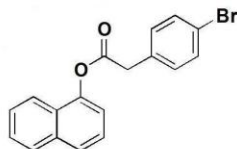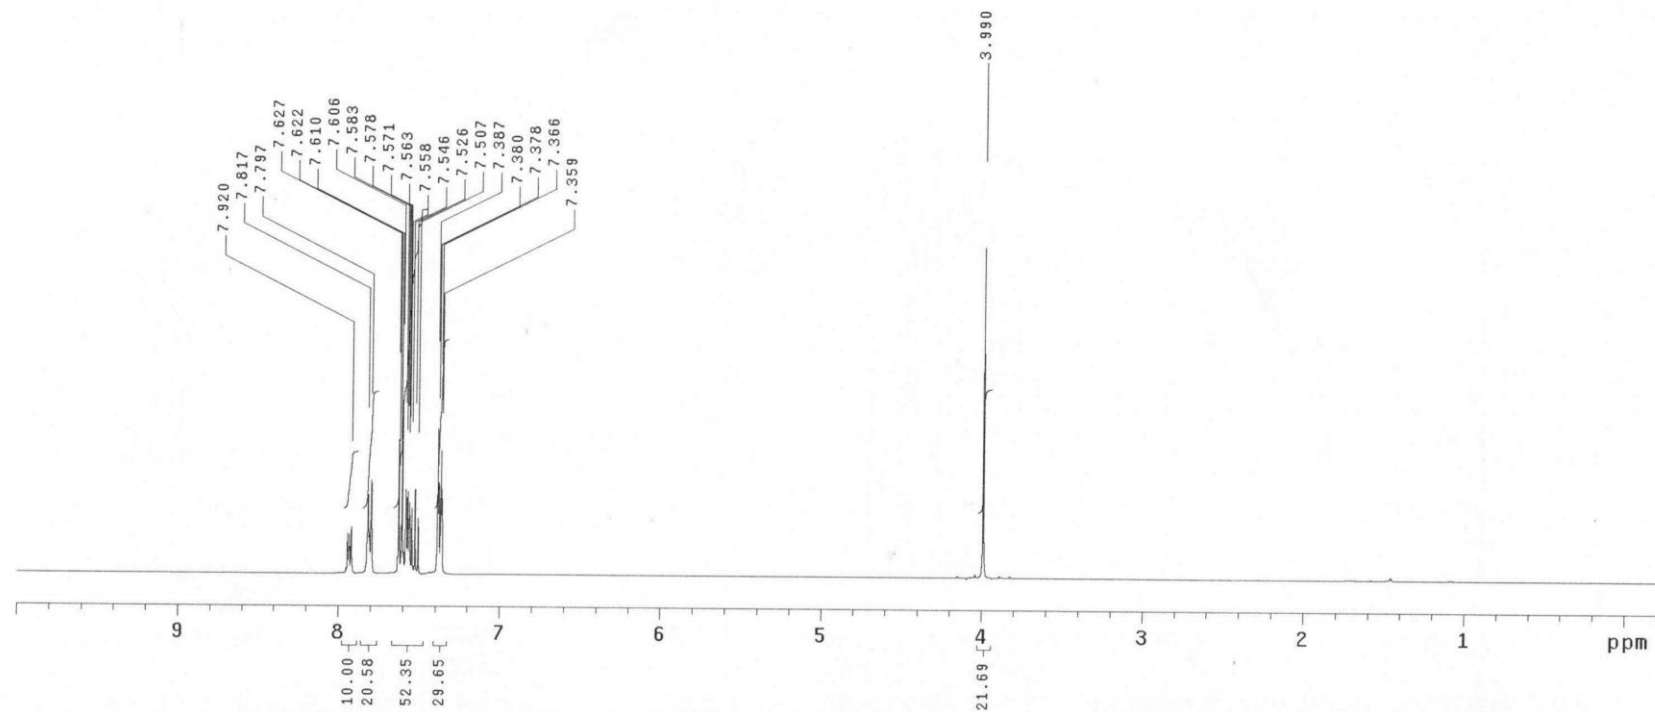

# Compound 3h (<sup>1</sup>H-NMR spectral data-2)

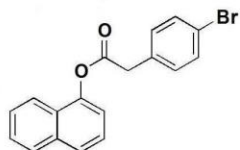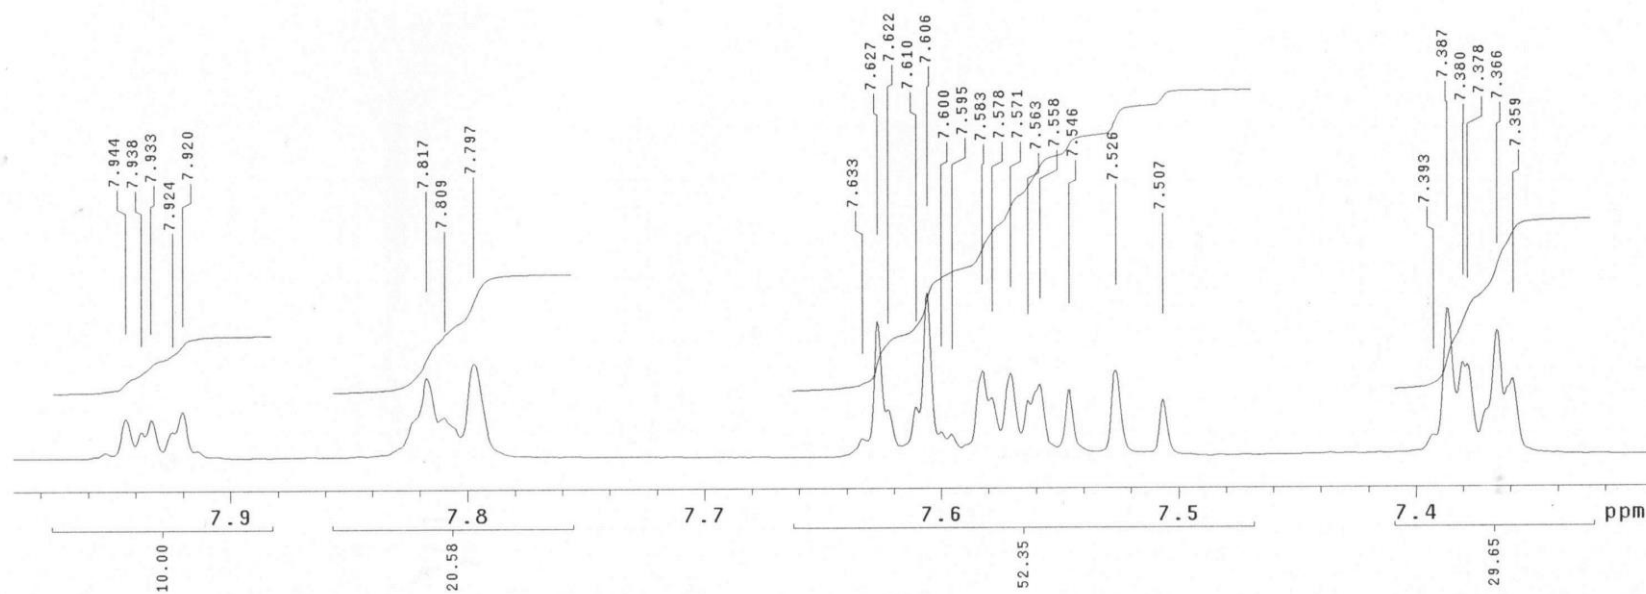

# Compound 3h (<sup>13</sup>C-NMR spectral data)

YT1070409

Pulse Sequence: s2pu1

UNITYplus-400 "unity400"

Date: Apr 10 2018

Solvent: CDCl<sub>3</sub>

Ambient temperature

Total 272 repetitions

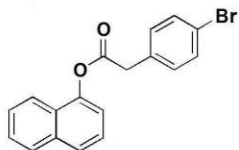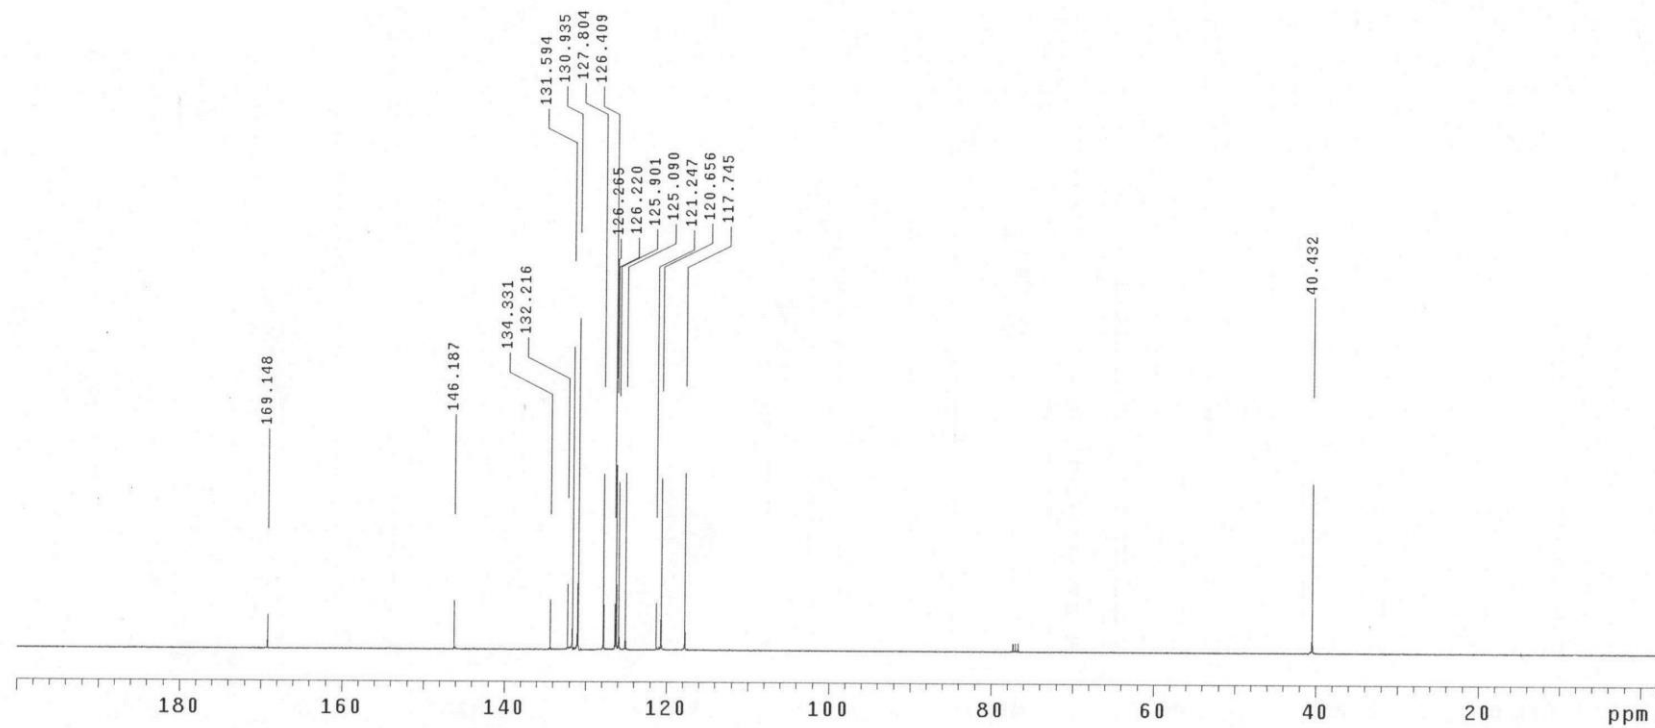

# Compound 3i (<sup>1</sup>H-NMR spectral data-1)

SMPPA2F

Pulse Sequence: s2pu1  
UNITYplus-400 "unity400"  
Date: Apr 16 2018  
Solvent: CDCl<sub>3</sub>  
Ambient temperature  
Total 32 repetitions

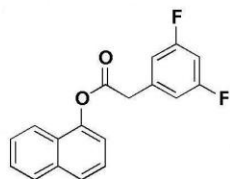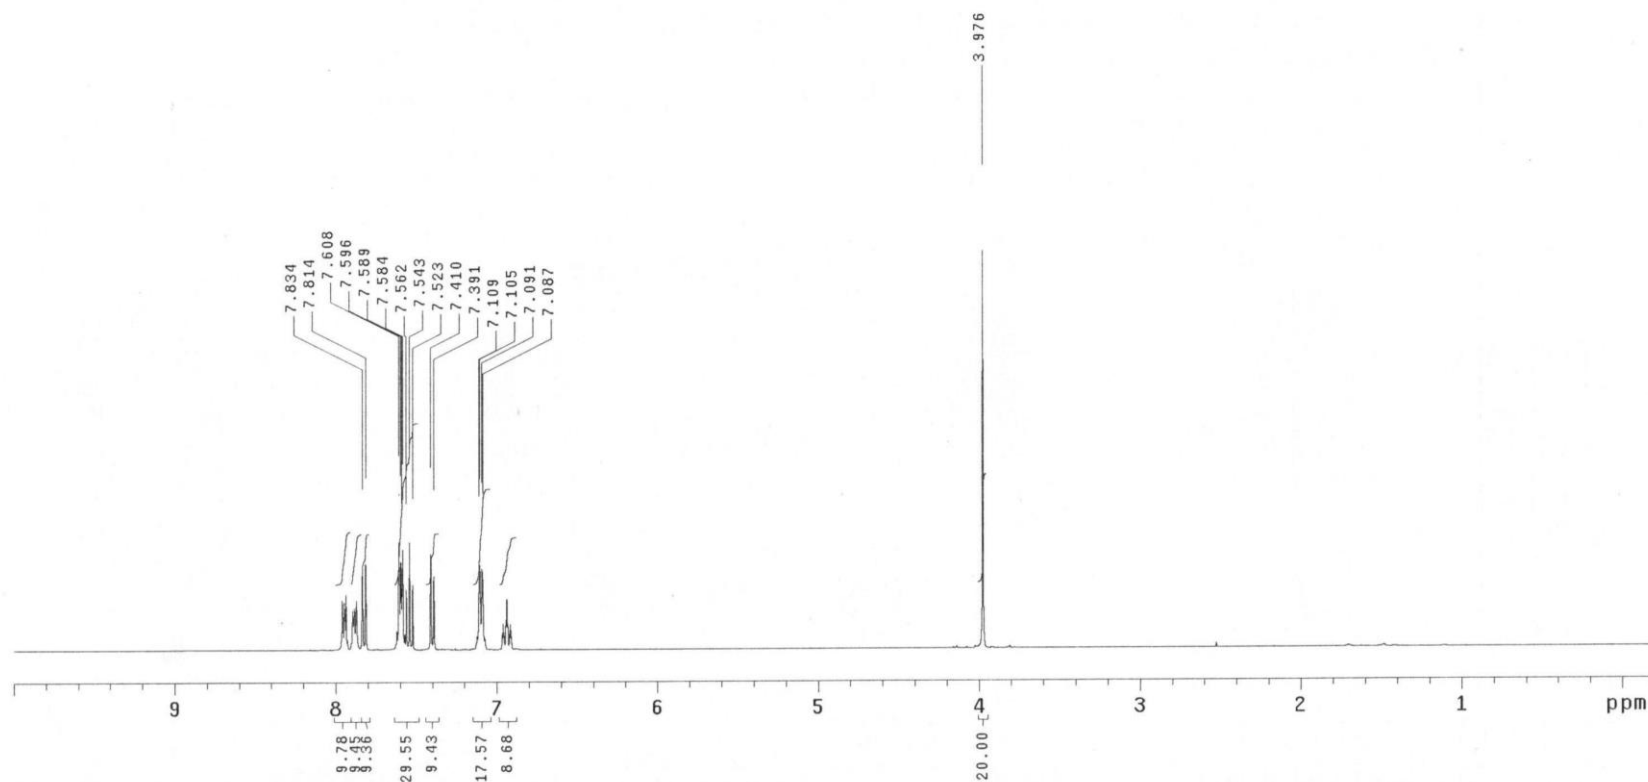



# Compound 3i (<sup>1</sup>H-NMR spectral data-2)

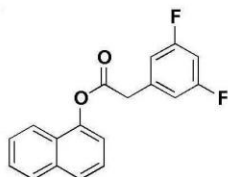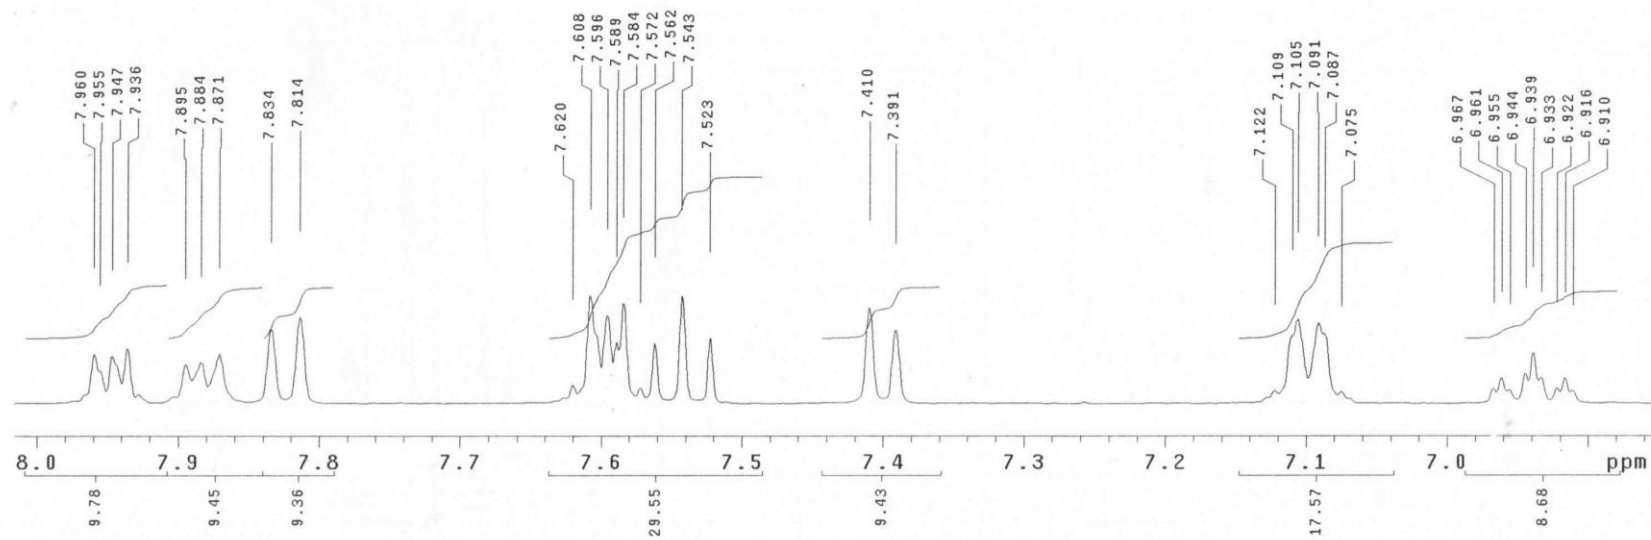

# Compound 3i (<sup>13</sup>C-NMR spectral data)

SMPPA2F

Pulse Sequence: s2pul

UNITYplus-400 "unity400"

Date: Apr 16 2018

Solvent: CDCl<sub>3</sub>

Ambient temperature

Total 32000 repetitions

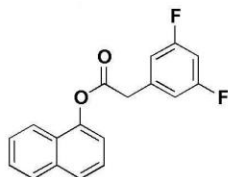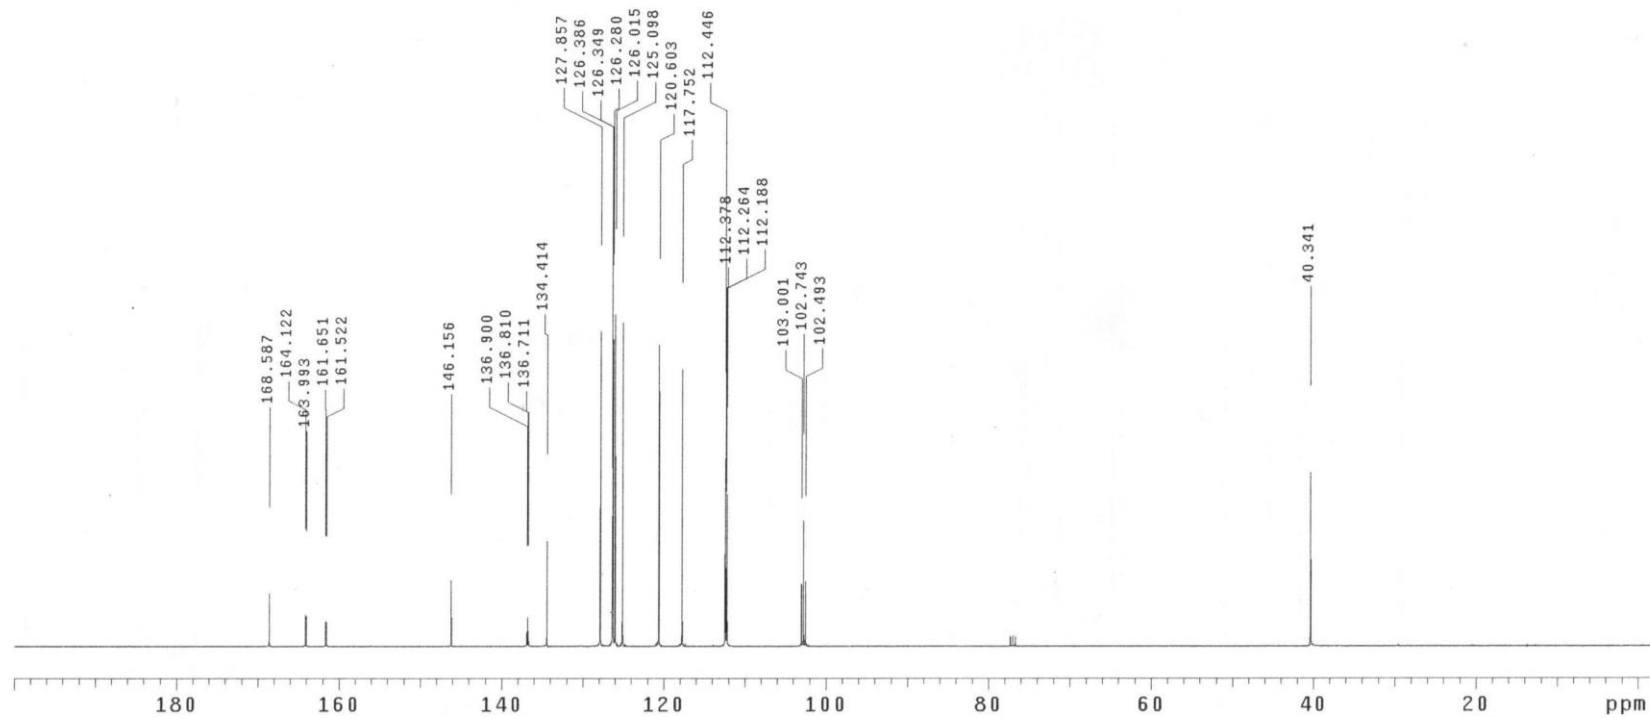

# Compound 3j (<sup>1</sup>H-NMR spectral data)

SHPPACF3

Pulse Sequence: s2pu1

UNITYplus-400 "unity400"

Date: Apr 23 2018

Solvent: CDCl<sub>3</sub>

Ambient temperature

Total 32 repetitions

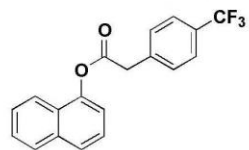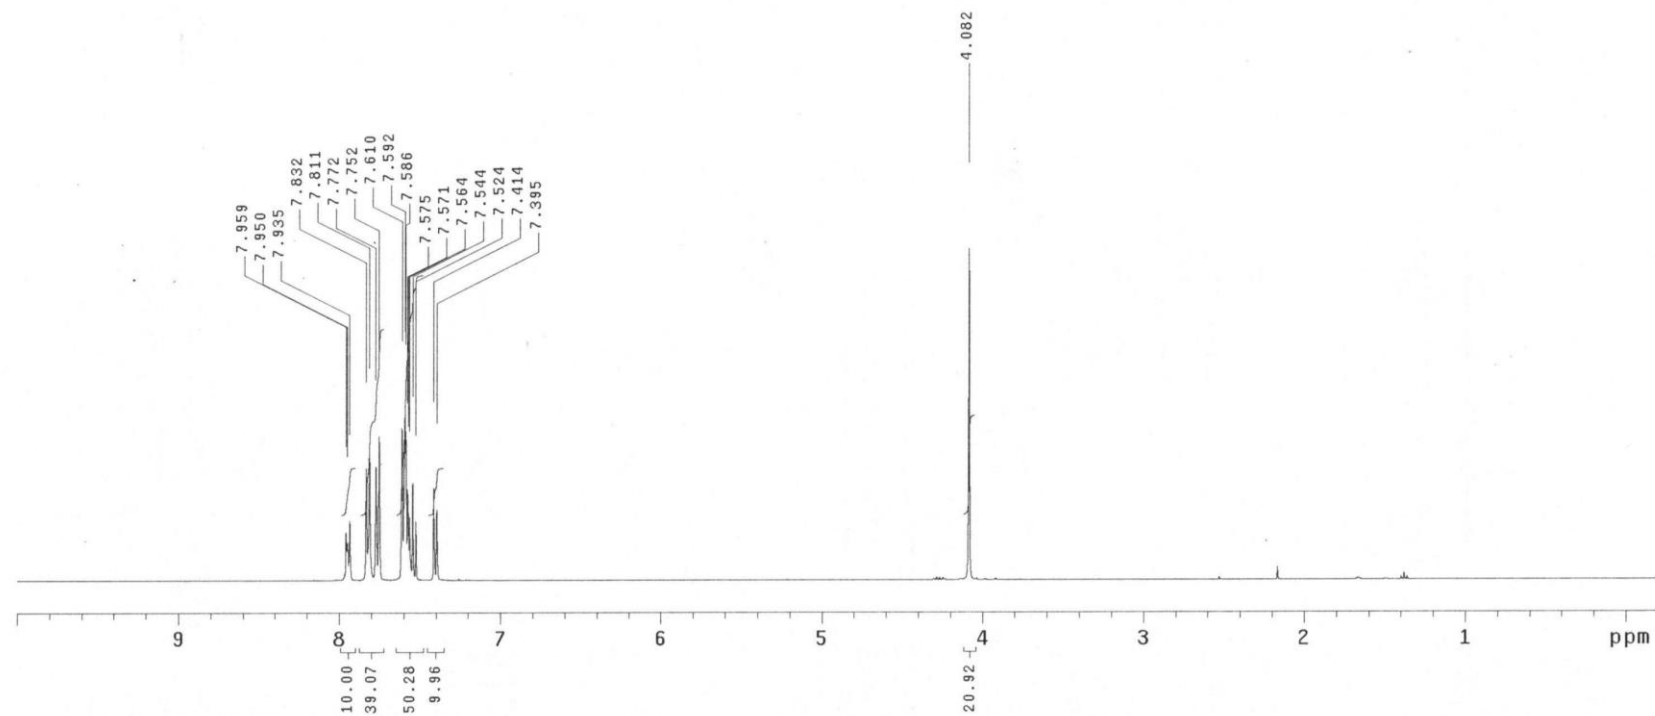

# Compound 3j (<sup>13</sup>C-NMR spectral data)

SHPPACF3

Pulse Sequence: s2pu1

UNITYplus-400 "unity400"

Date: Apr 23 2018

Solvent: CDCl<sub>3</sub>

Ambient temperature

Total 432 repetitions

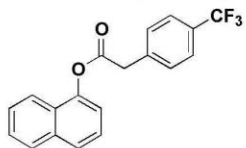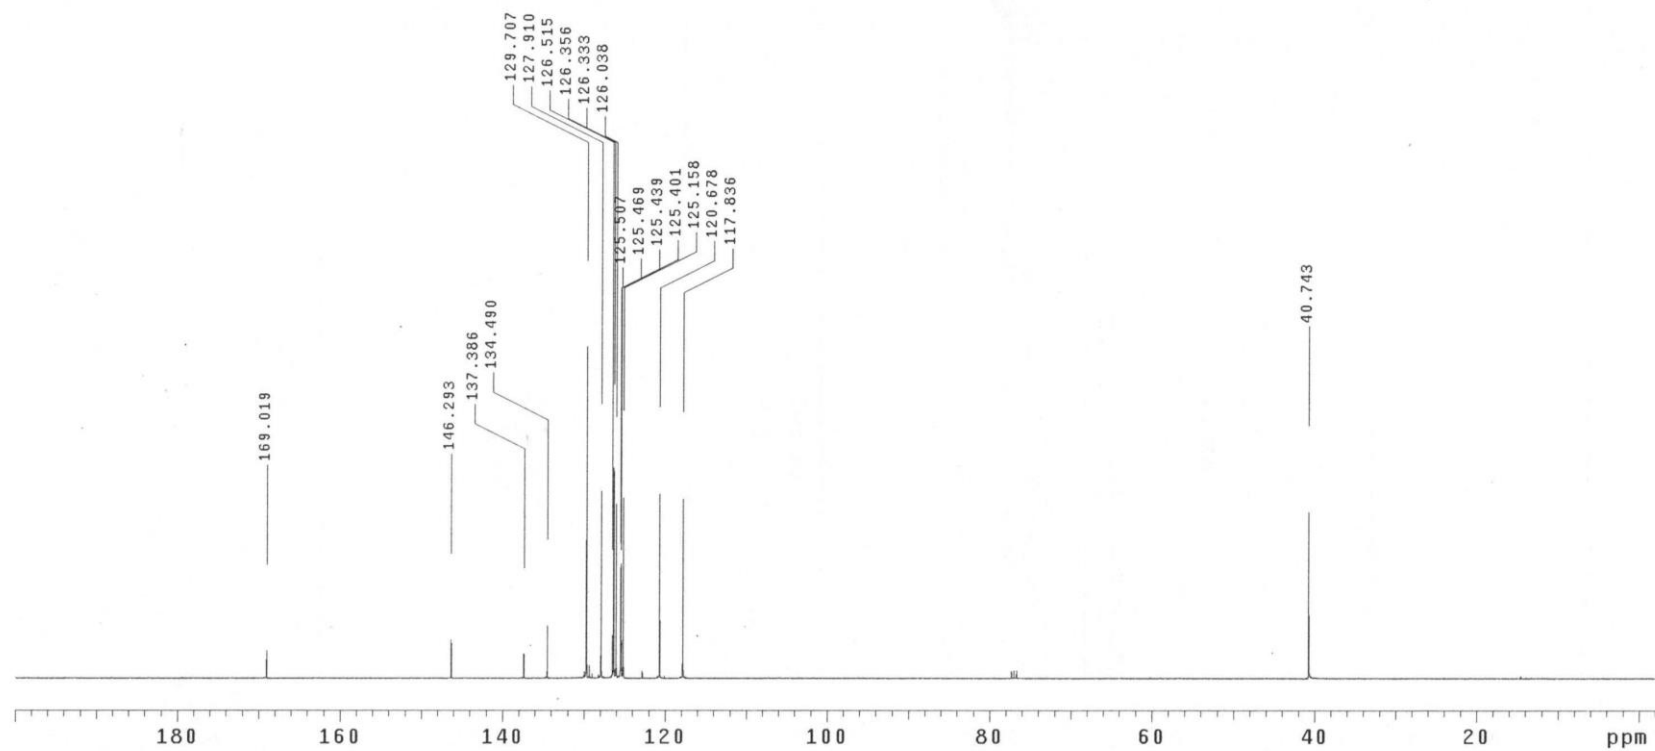

# Compound 3k (<sup>1</sup>H-NMR spectral data)

SHNAPPA

Pulse Sequence: s2pu1

UNITYplus-400 "unity400"

Date: Apr 26 2018

Solvent: CDCl<sub>3</sub>

Ambient temperature

Total 32 repetitions

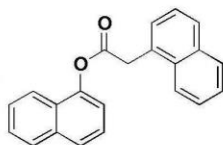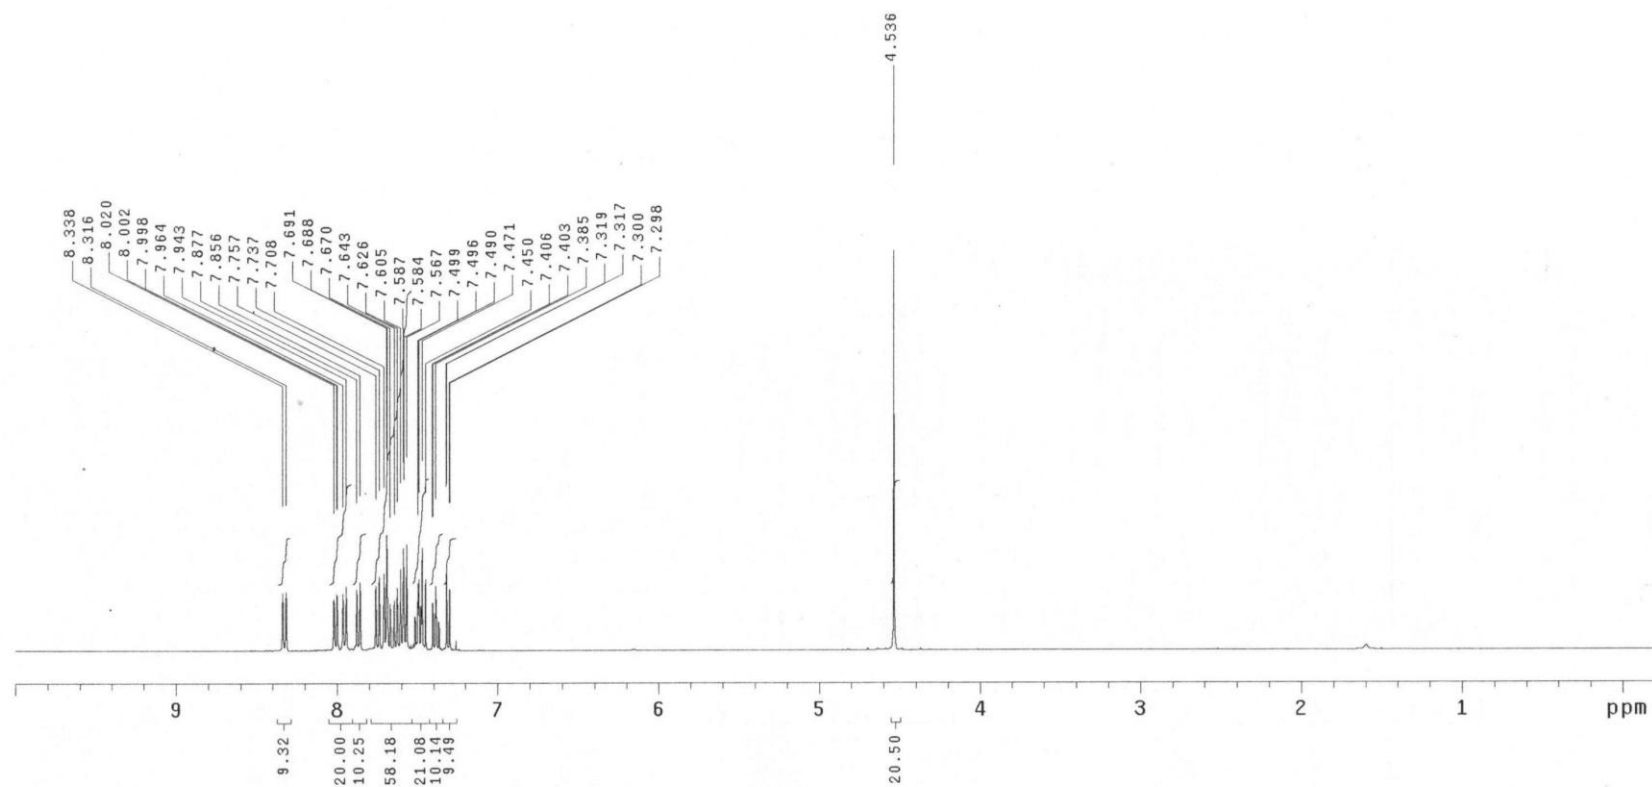

# Compound 3k (<sup>13</sup>C-NMR spectral data)

SHNAPPA

Pulse Sequence: s2pu1

UNITYplus-400 "unity400"

Date: Apr 26 2018

Solvent: CDCl<sub>3</sub>

Ambient temperature

Total 176 repetitions

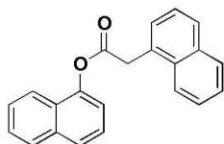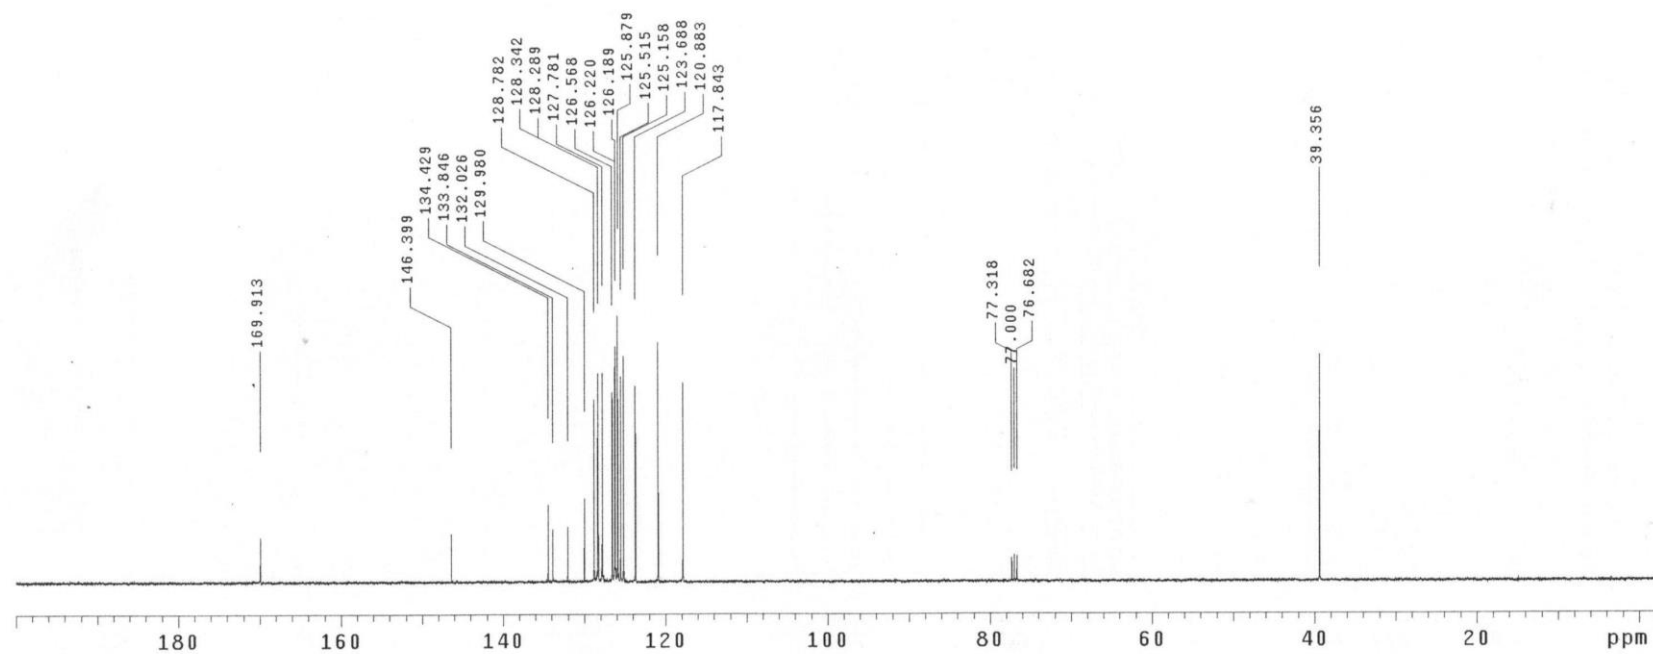

# Compound 3l (<sup>1</sup>H-NMR spectral data)

CYNACF3

Pulse Sequence: s2pu1

UNITYplus-400 "unity400"

Date: Jul 17 2019

Solvent: CDC13

Ambient temperature

Total 32 repetitions

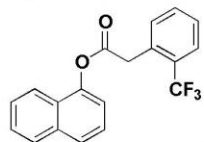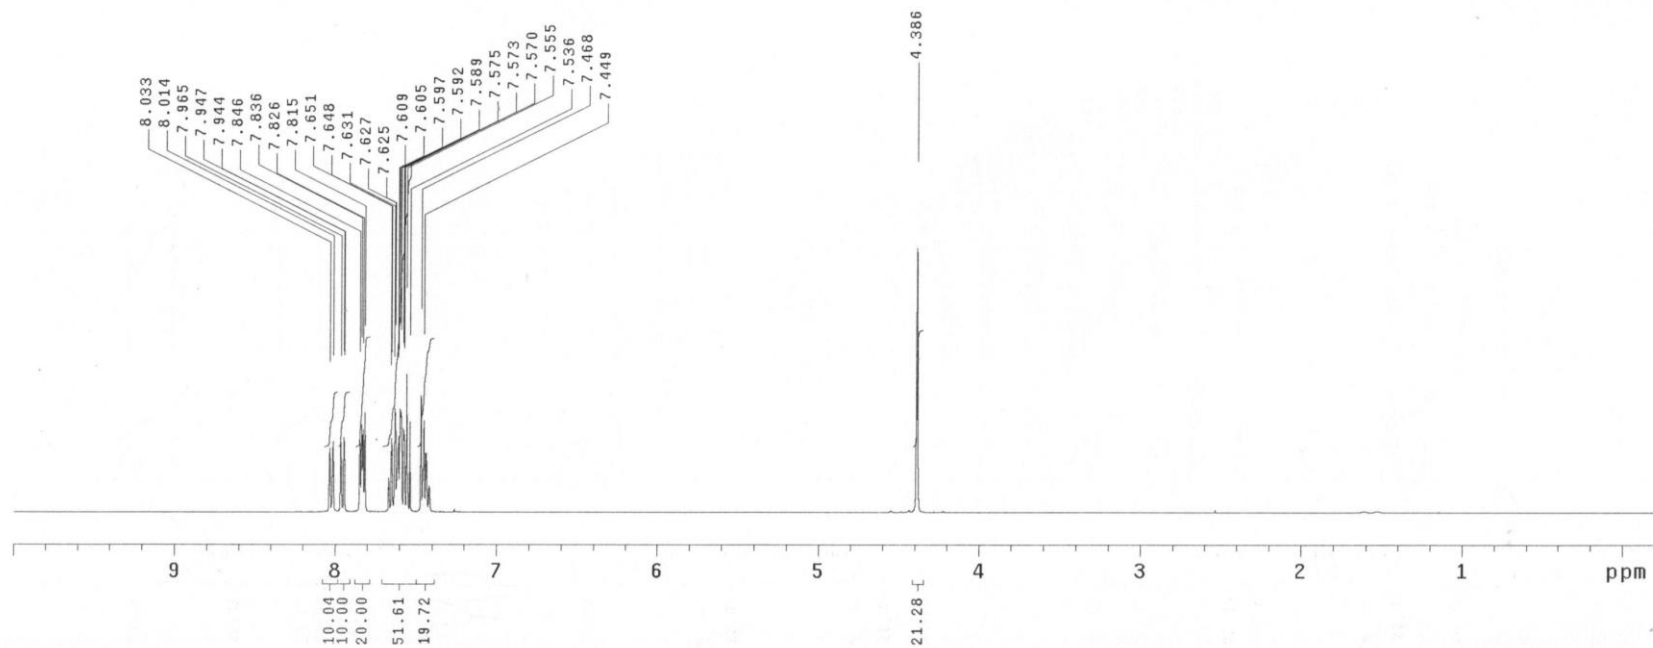

# Compound 3I (<sup>13</sup>C-NMR spectral data)

CYNACF3

Pulse Sequence: s2pu1

UNITYplus-400 "unity400"

Date: Jul 17 2019

Solvent: CDCl<sub>3</sub>

Ambient temperature

Total 128 repetitions

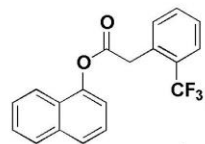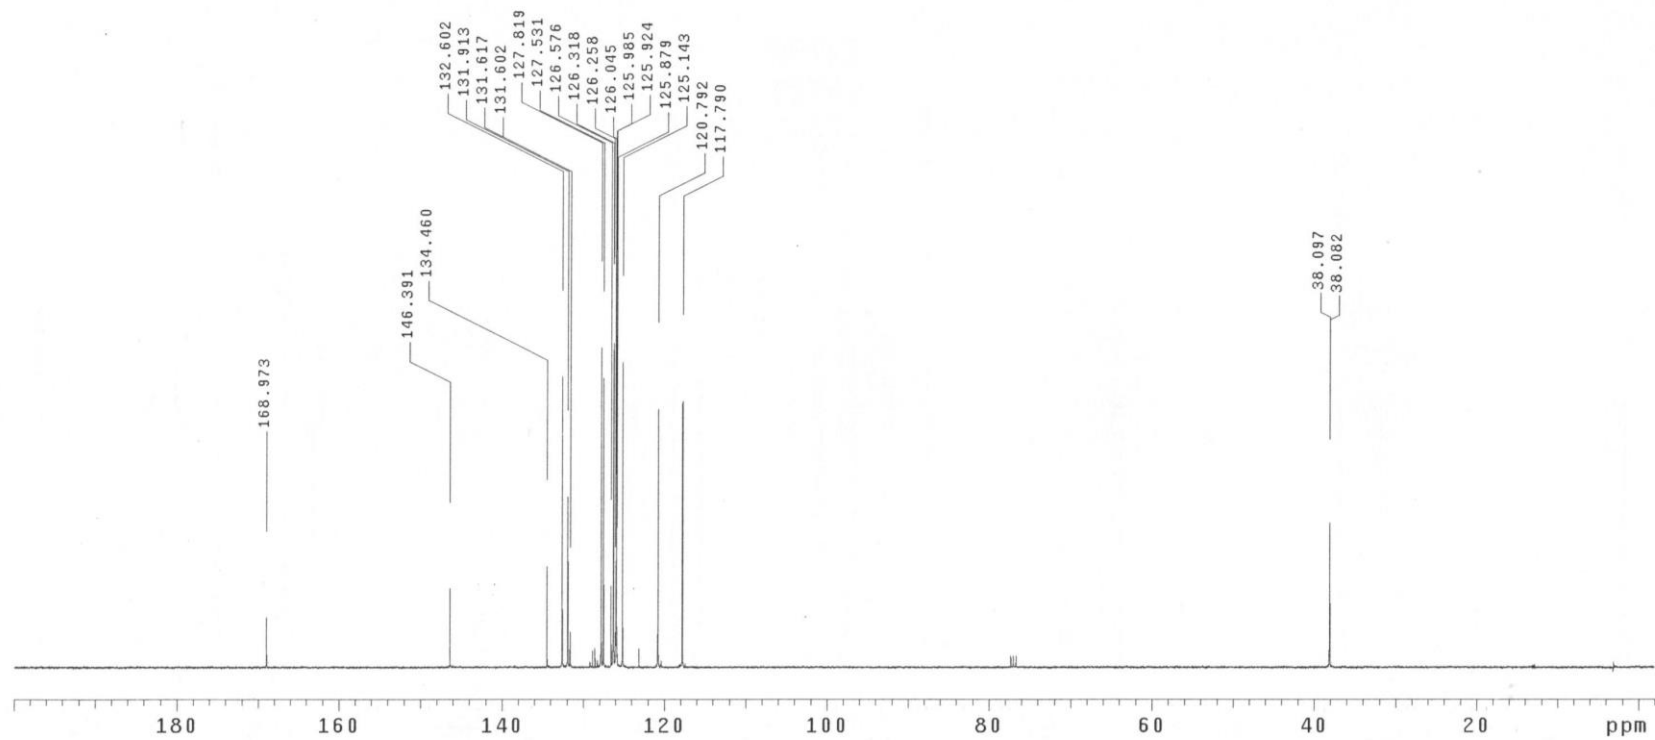



# Compound 3m (<sup>1</sup>H-NMR spectral data)

SHPPAPh2MeO

Pulse Sequence: s2pu1

UNITYplus-400 "unity400"

Date: May 3 2018

Solvent: CDCl<sub>3</sub>

Ambient temperature

Total 32 repetitions

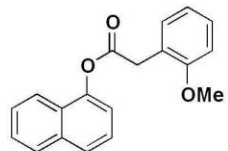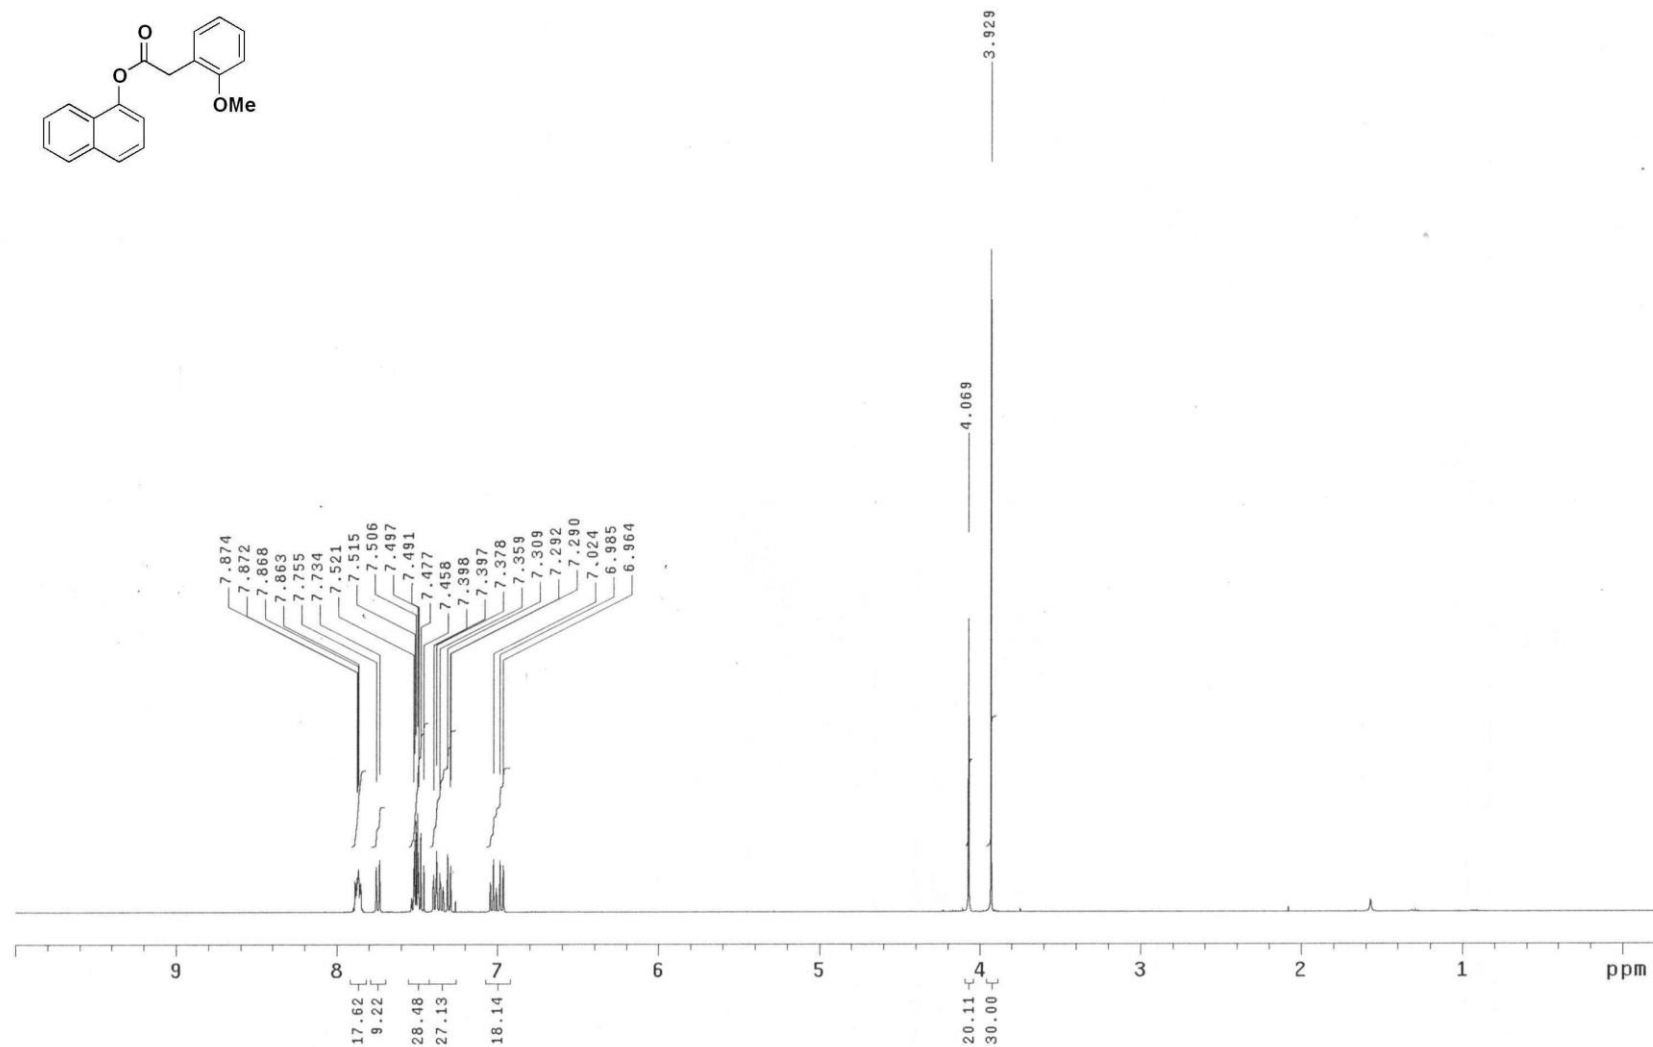

# Compound 3m (<sup>13</sup>C-NMR spectral data)

SHPPAPh2MeO

Pulse Sequence: s2pu1

UNITYplus-400 "unity400"

Date: May 3 2018

Solvent: CDCl<sub>3</sub>

Ambient temperature

Total 528 repetitions

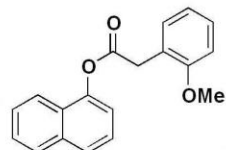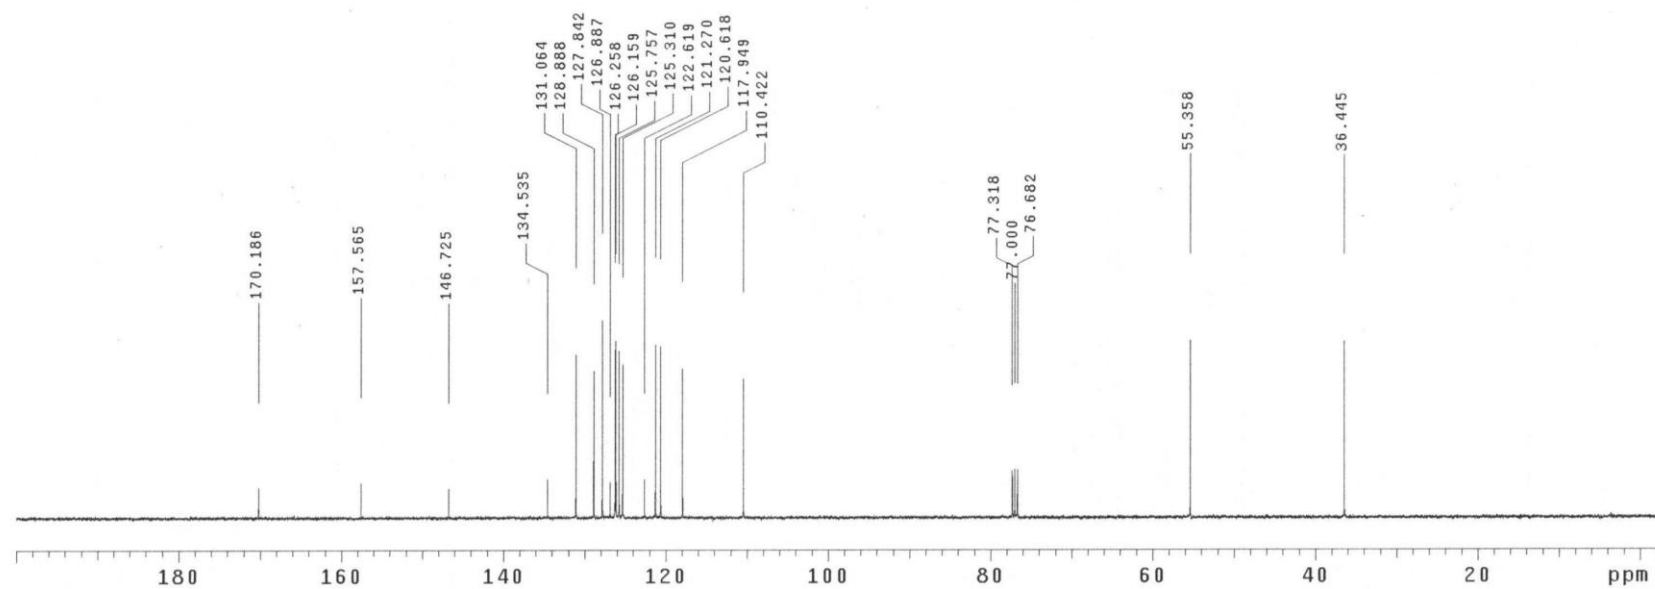

# Compound 3n (<sup>1</sup>H-NMR spectral data)

YTOMePh

Pulse Sequence: s2pu1

UNITYplus-400 "unity400"

Date: May 31 2018

Solvent: CDCl<sub>3</sub>

Ambient temperature

Total 32 repetitions

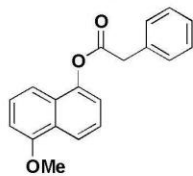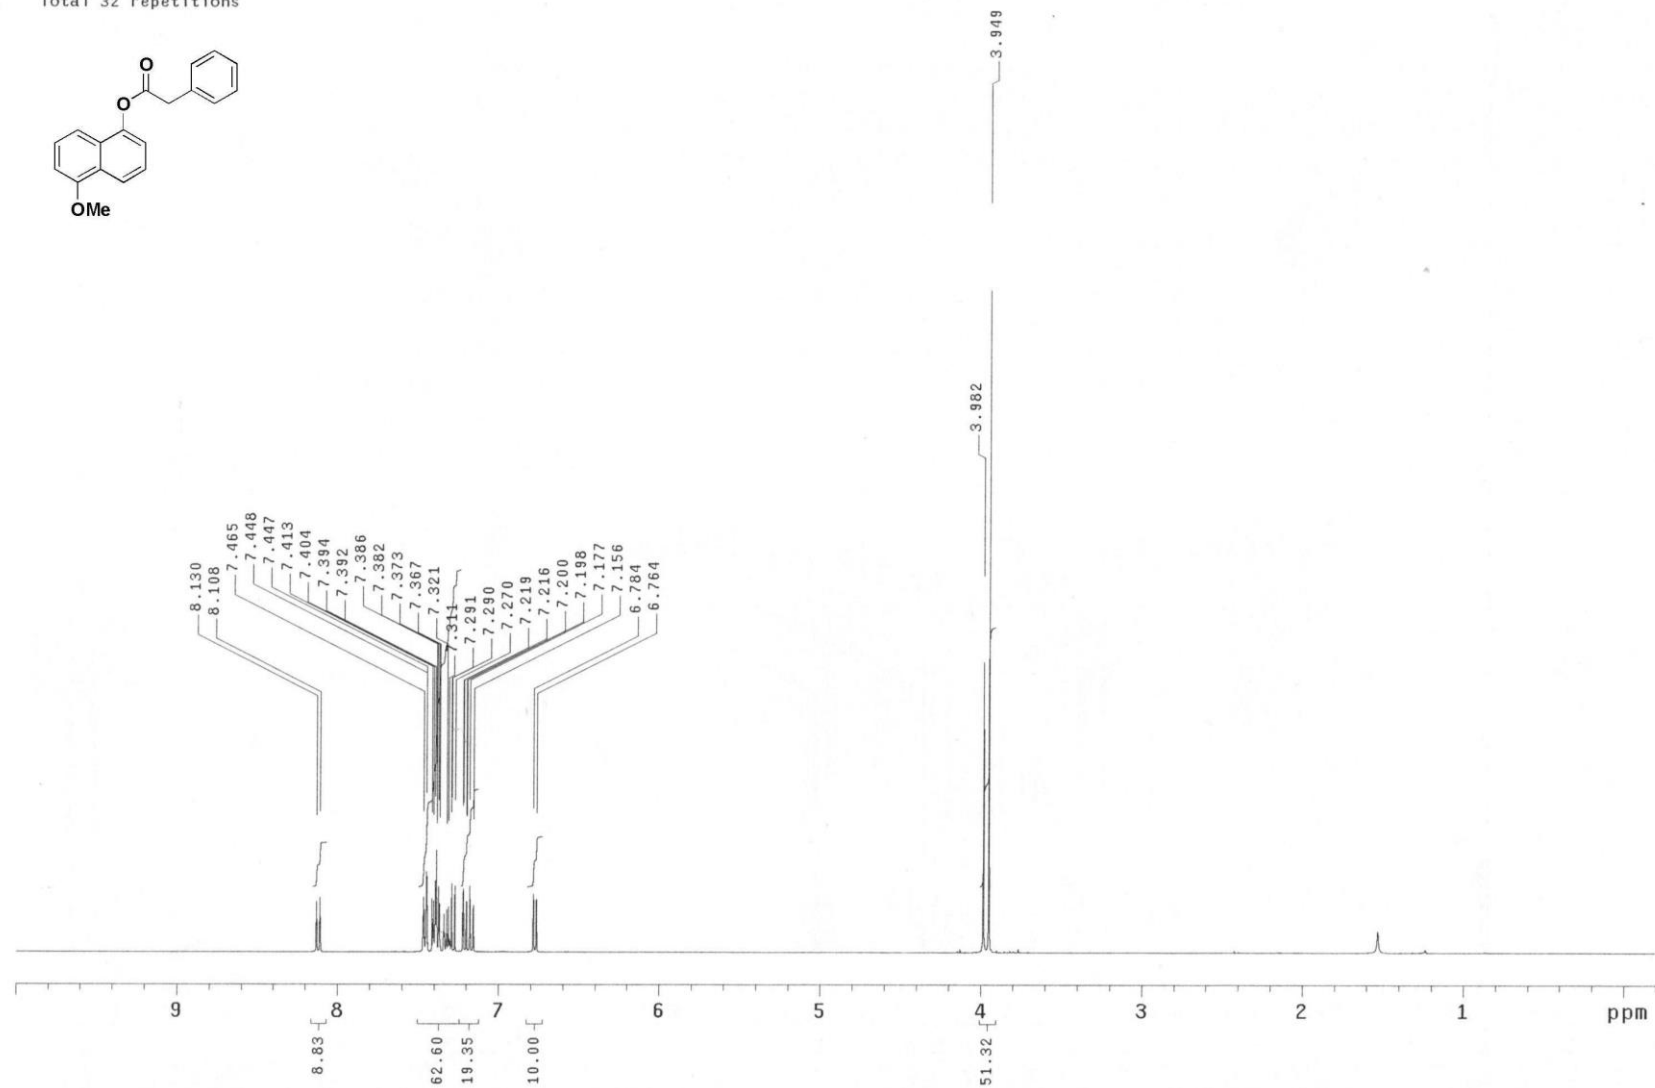

# Compound 3n (<sup>13</sup>C-NMR spectral data)

YTOmePh

Pulse Sequence: s2pu1  
UNITYplus-400 "unity400"  
Date: May 31 2018  
Solvent: CDCl<sub>3</sub>  
Ambient temperature  
Total 368 repetitions

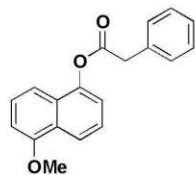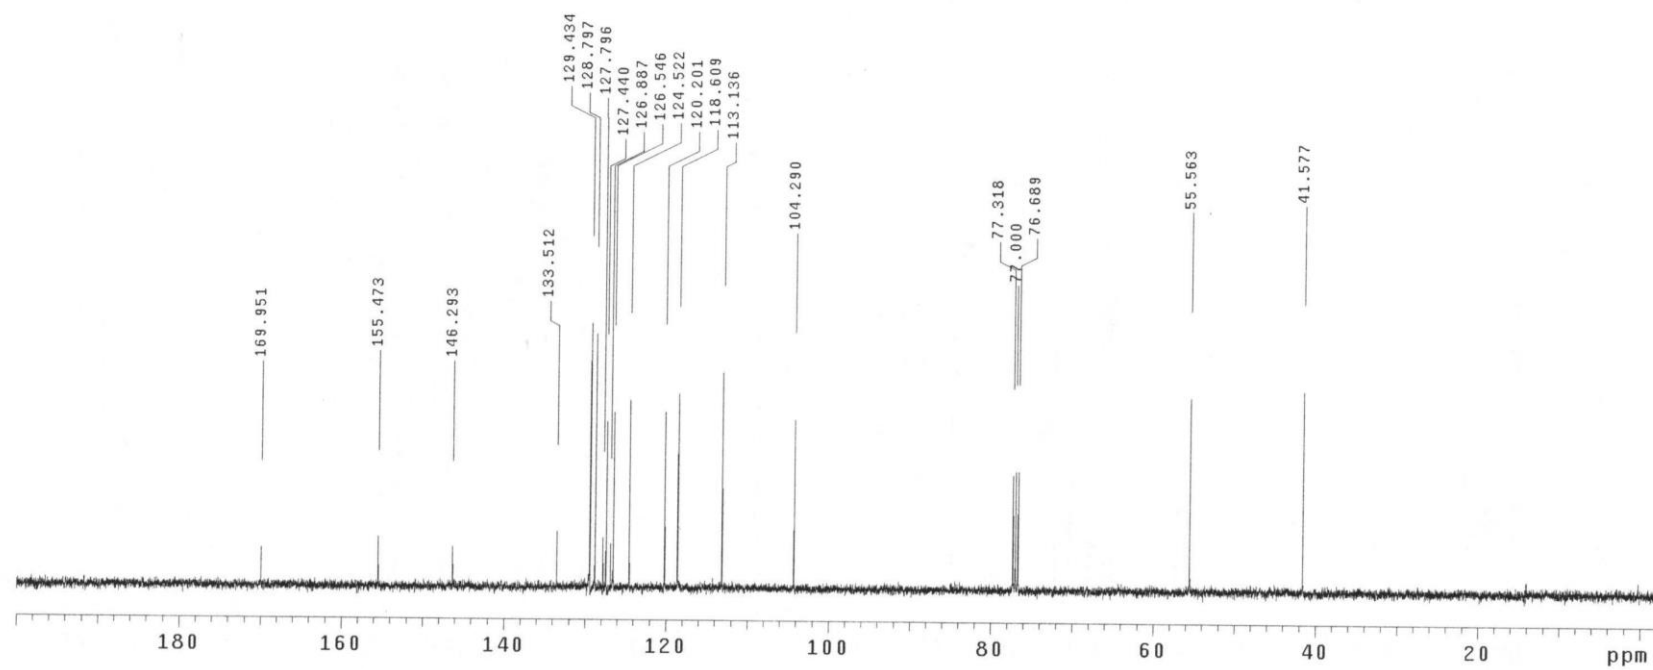

# Compound 3o (<sup>1</sup>H-NMR spectral data-1)

SH40MePPA

Pulse Sequence: s2pu1

UNITYplus-400 "unity400"

Date: Jul 26 2018

Solvent: CDCl<sub>3</sub>

Ambient temperature

Total 32 repetitions

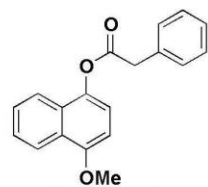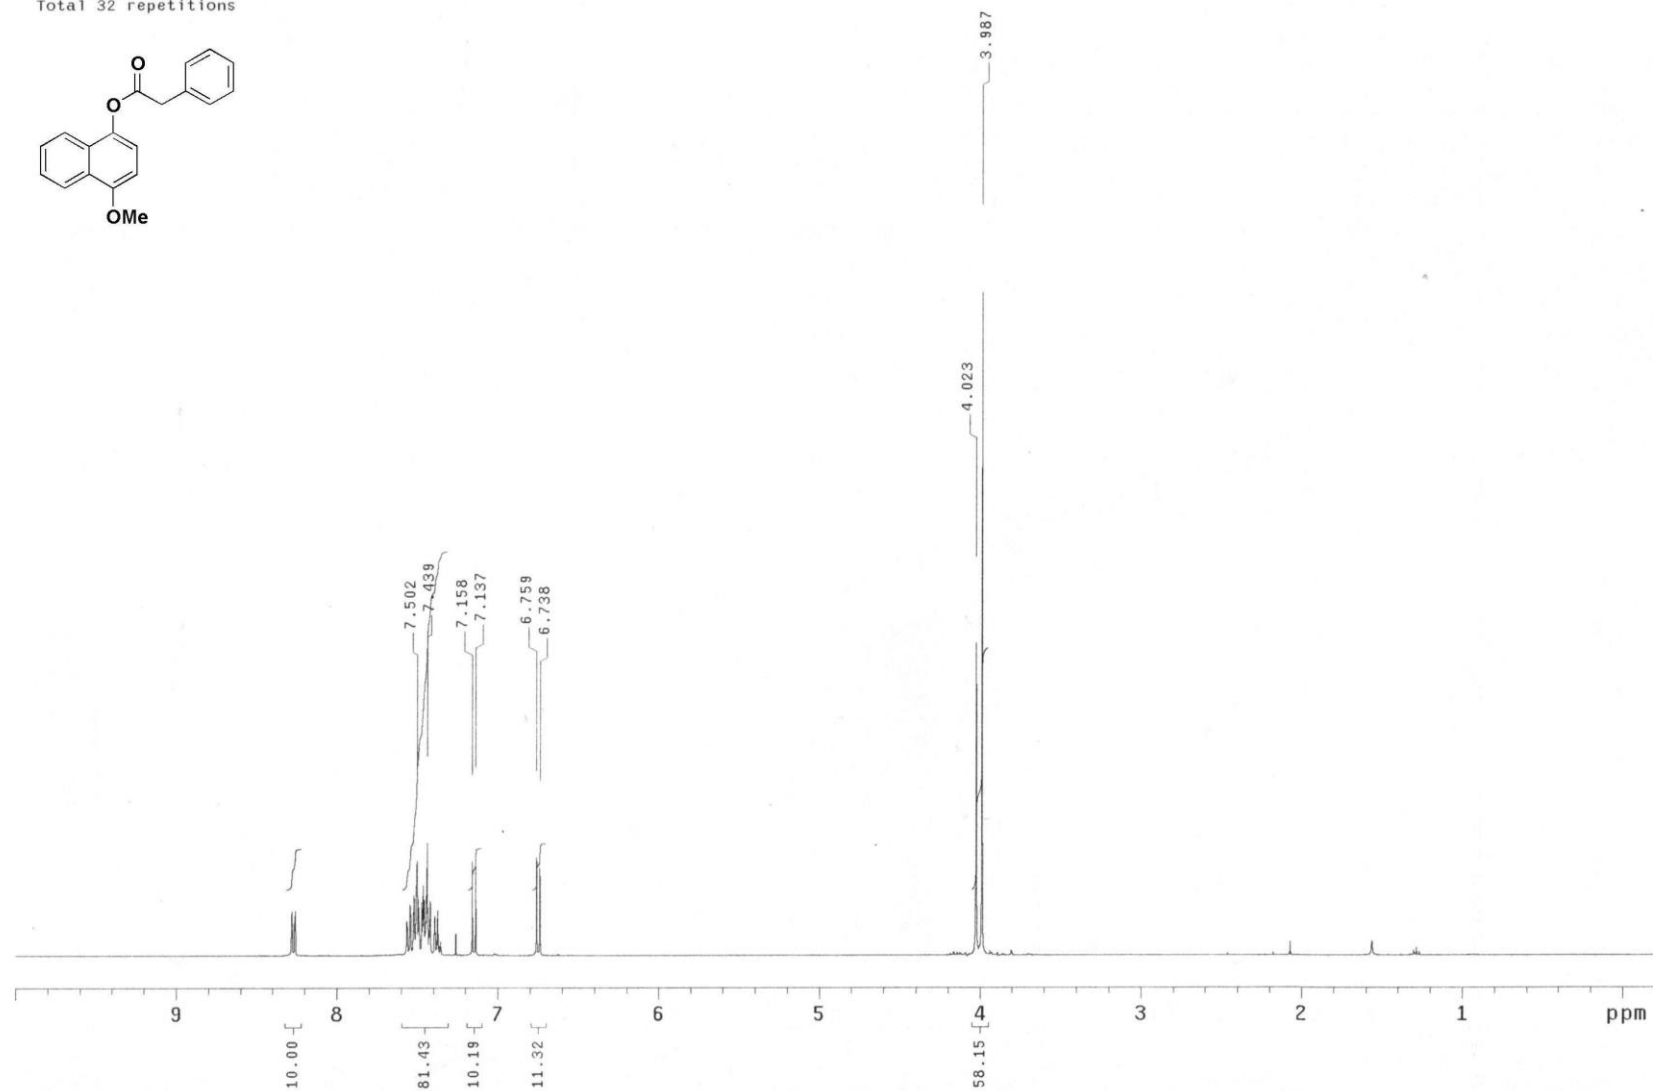

# Compound 3o (<sup>1</sup>H-NMR spectral data-2)

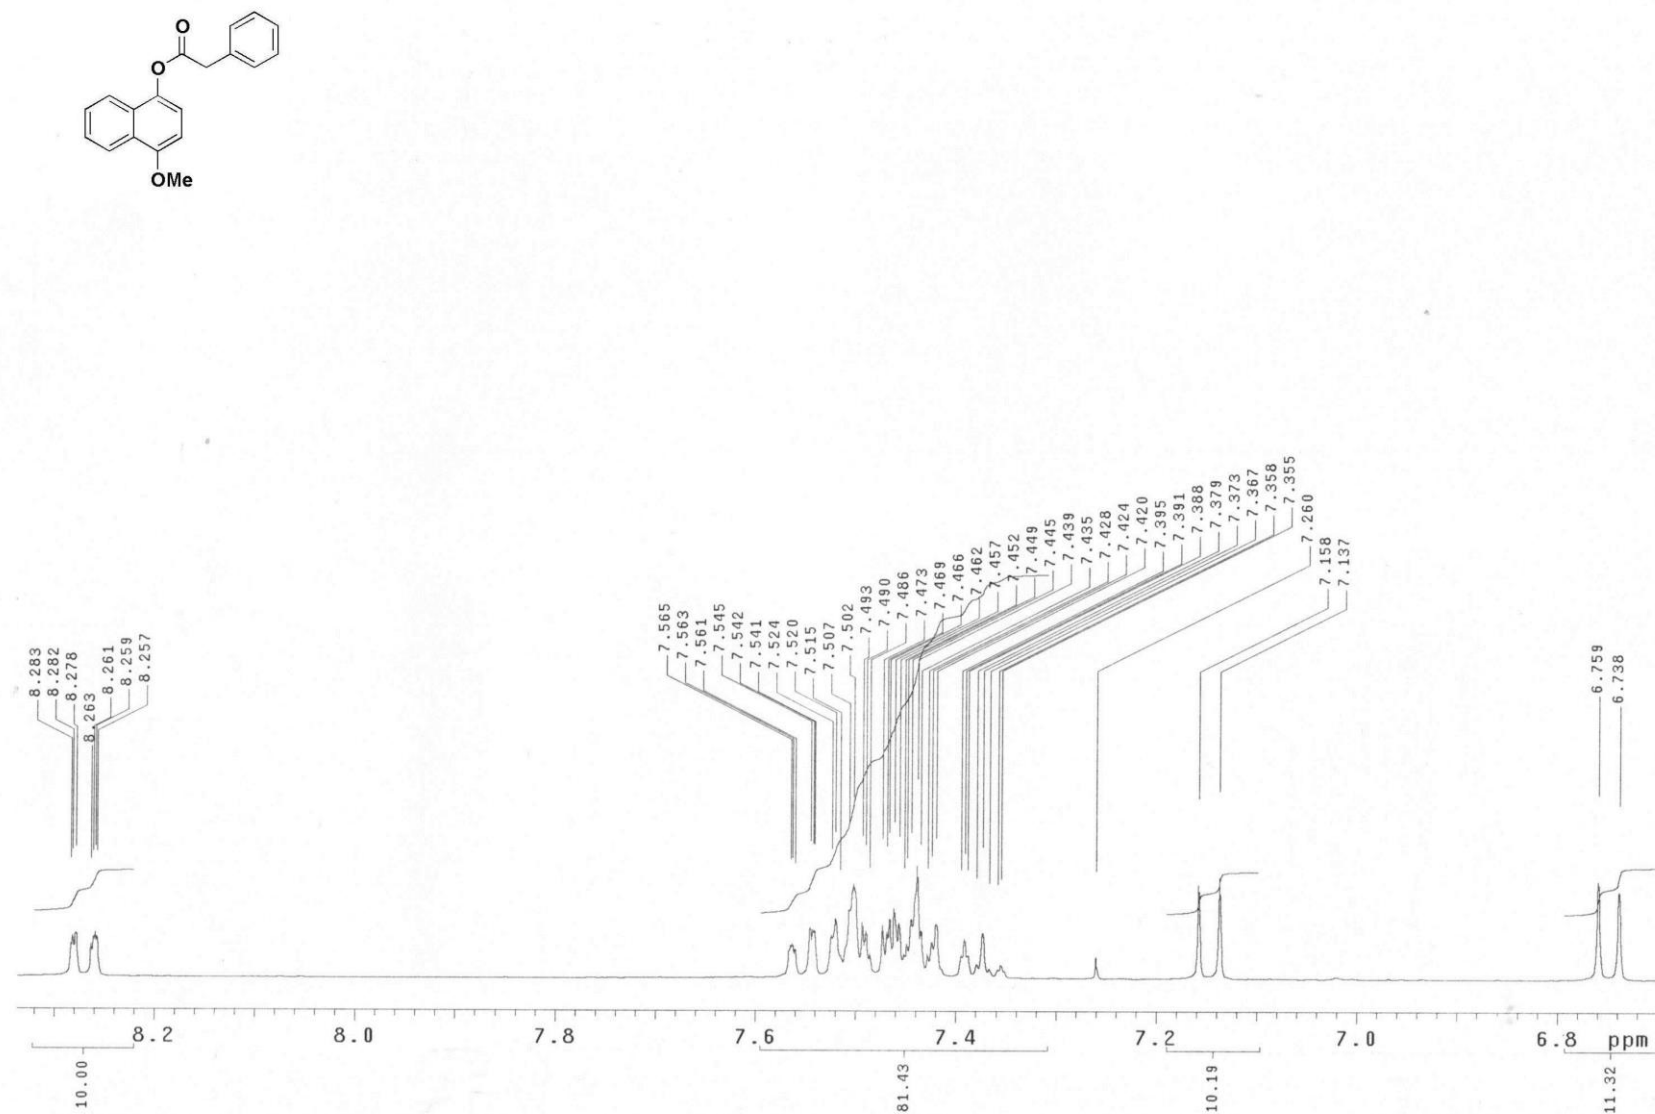

# Compound 3o (<sup>13</sup>C-NMR spectral data)

SH40MePPA

Pulse Sequence: s2pu1

UNITYplus-400 "unity400"

Date: Jul 26 2018

Solvent: CDCl<sub>3</sub>

Ambient temperature

Total 128 repetitions

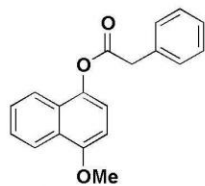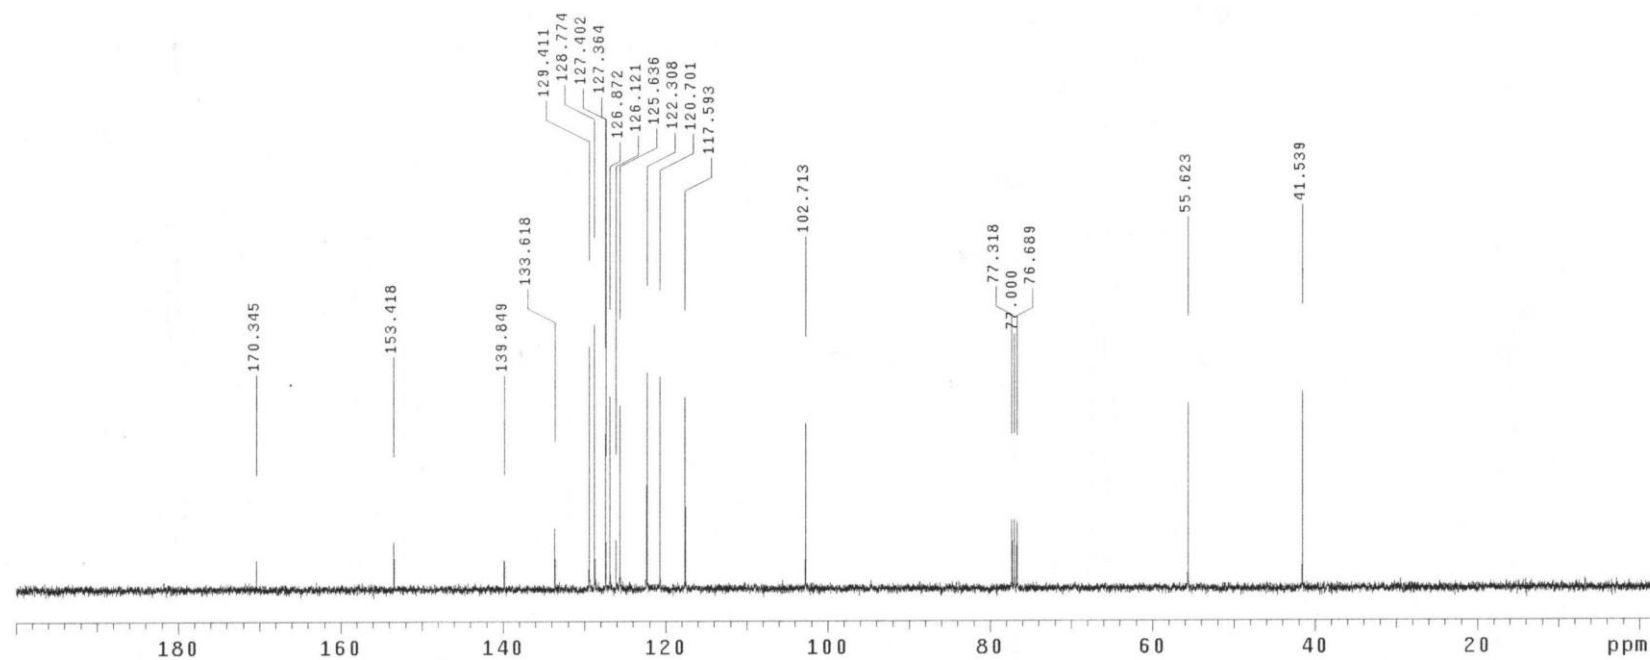

# Compound 3p (<sup>1</sup>H-NMR spectral data-1)

SH4C1PPA

Pulse Sequence: s2pu1

UNITYplus-400 "unity400"

Date: Jul 23 2018

Solvent: CDCl<sub>3</sub>

Ambient temperature

Total 32 repetitions

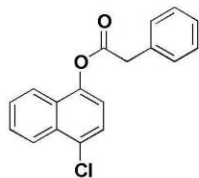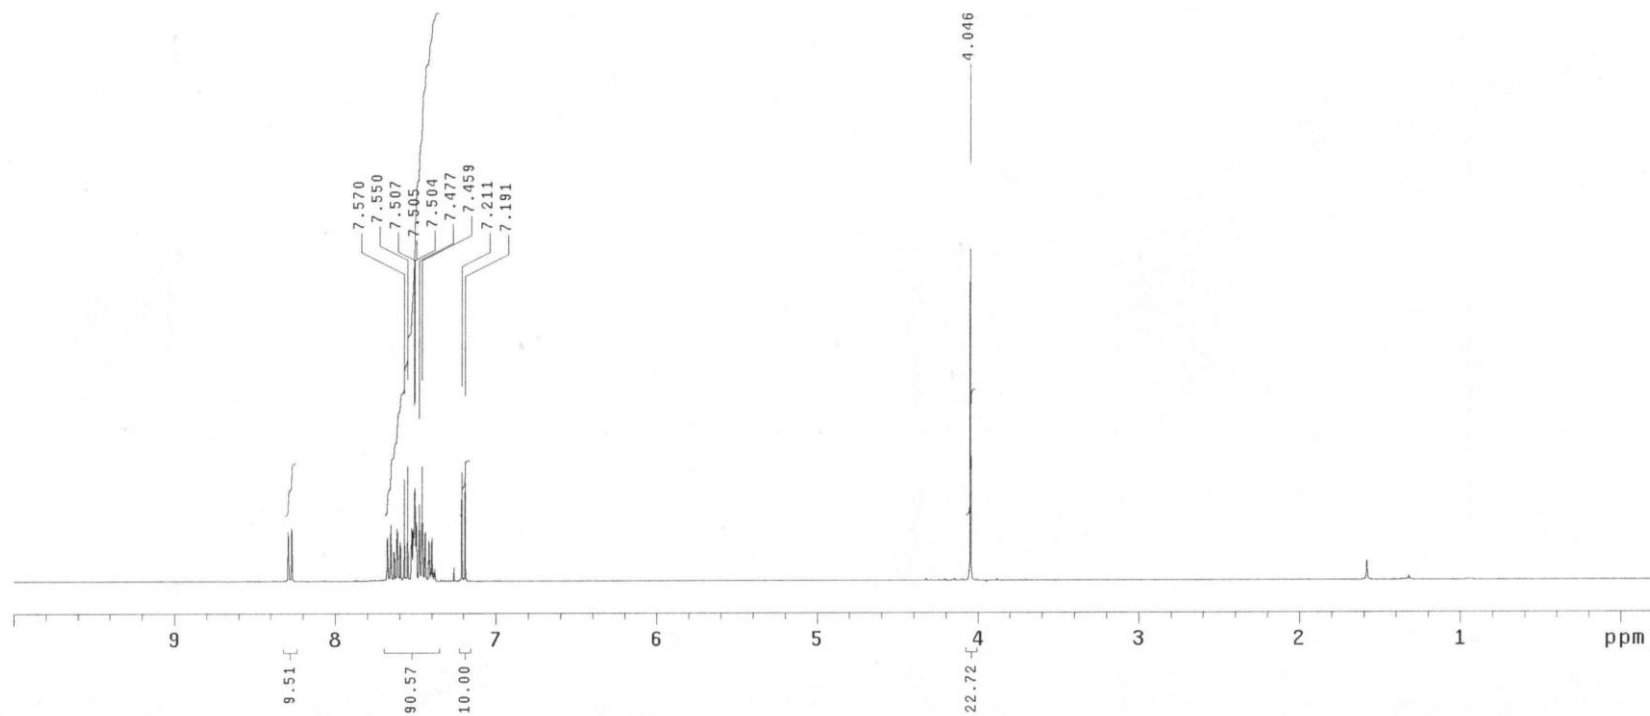



# Compound 3p (<sup>1</sup>H-NMR spectral data-2)

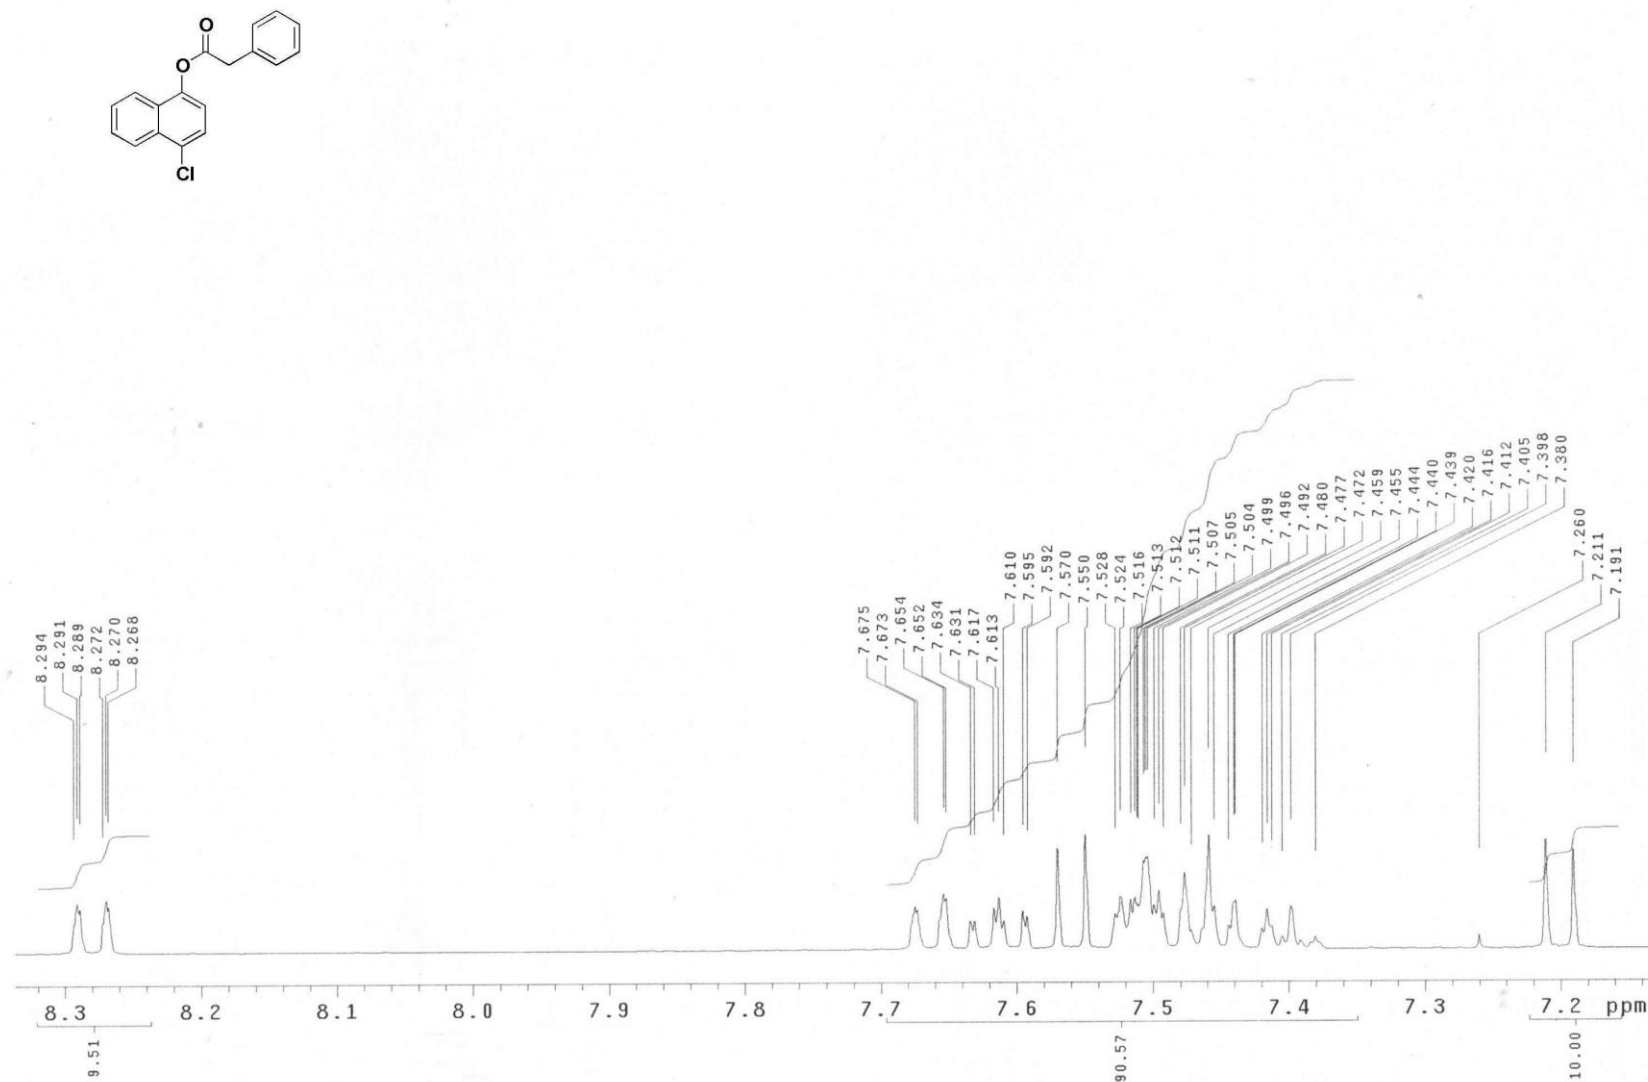

# Compound 3p (<sup>13</sup>C-NMR spectral data)

SH4C1PPA

Pulse Sequence: s2pu1

UNITYplus-400 "unity400"

Date: Jul 23 2018

Solvent: CDCl<sub>3</sub>

Ambient temperature

Total 112 repetitions

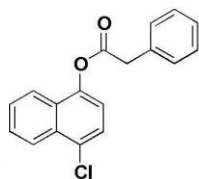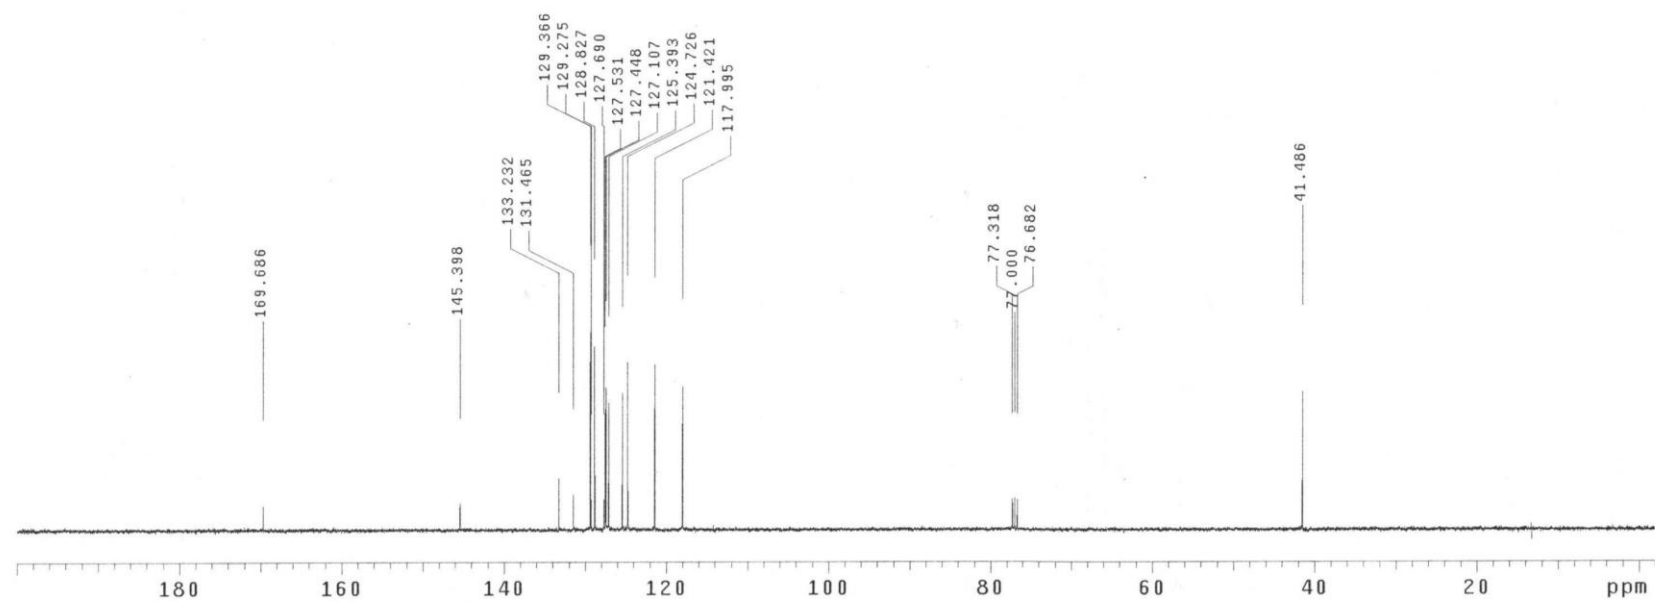

# Compound 3q (<sup>1</sup>H-NMR spectral data-1)

YT15NAP2

Pulse Sequence: s2pu1

UNITYplus-400 "unity400"

Date: May 10 2018

Solvent: CDCl<sub>3</sub>

Ambient temperature

Total 32 repetitions

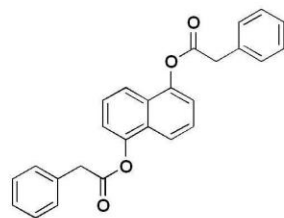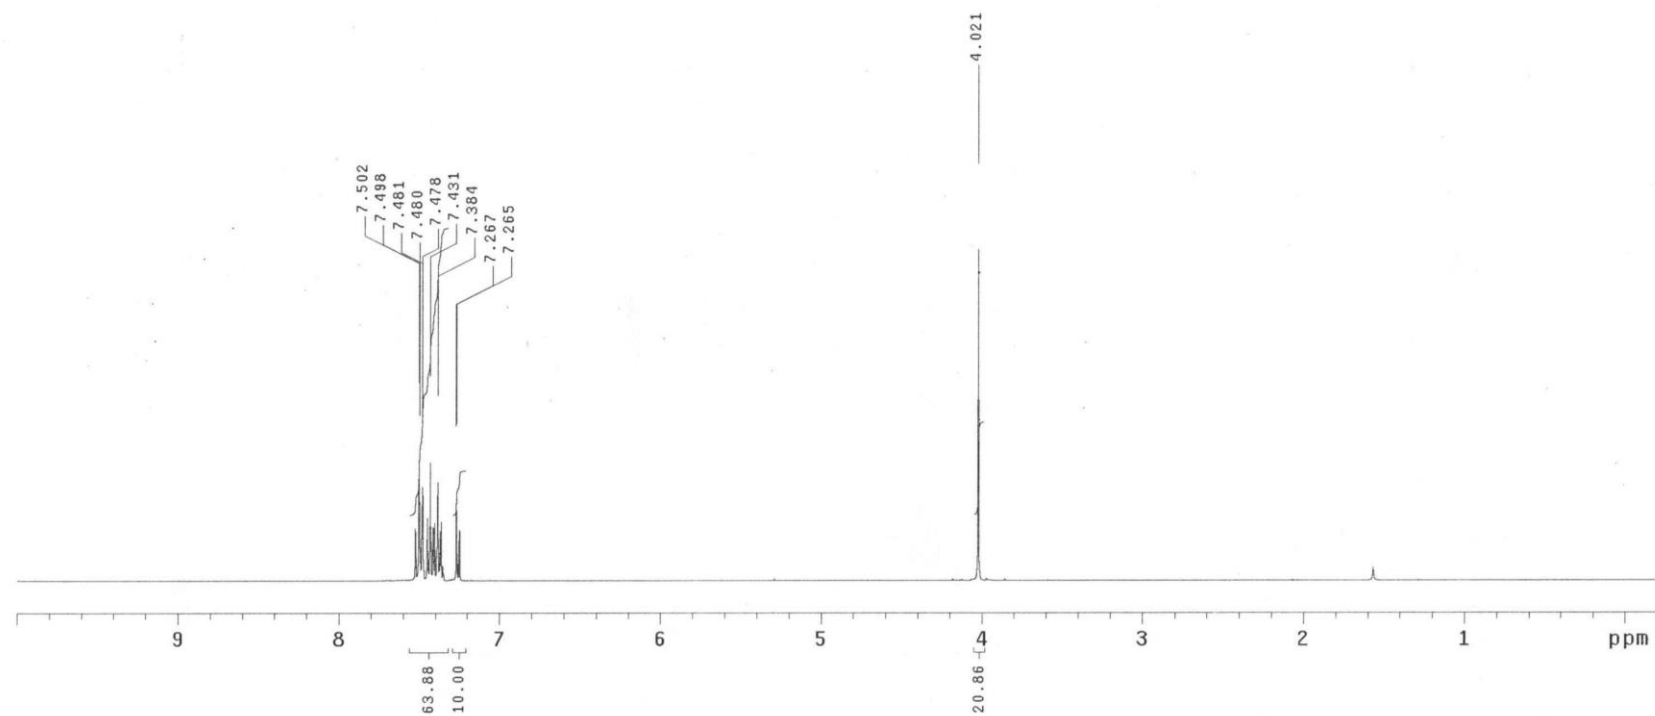

# Compound 3q (<sup>1</sup>H-NMR spectral data-2)

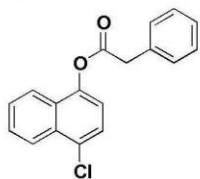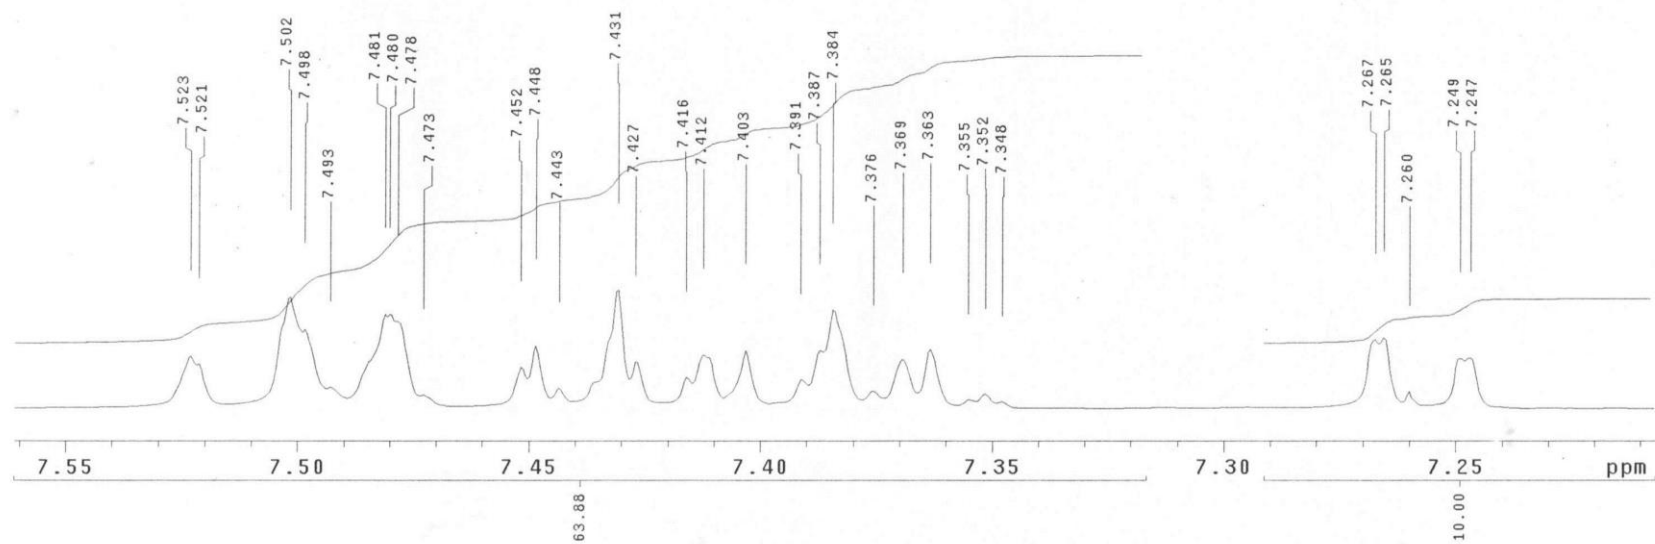

# Compound 3q (<sup>13</sup>C-NMR spectral data)

YT15NAP2

Pulse Sequence: s2pul

UNITYplus-400 "unity400"

Date: May 10 2018

Solvent: CDCl<sub>3</sub>

Ambient temperature

Total 208 repetitions

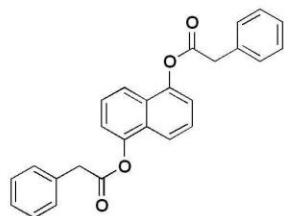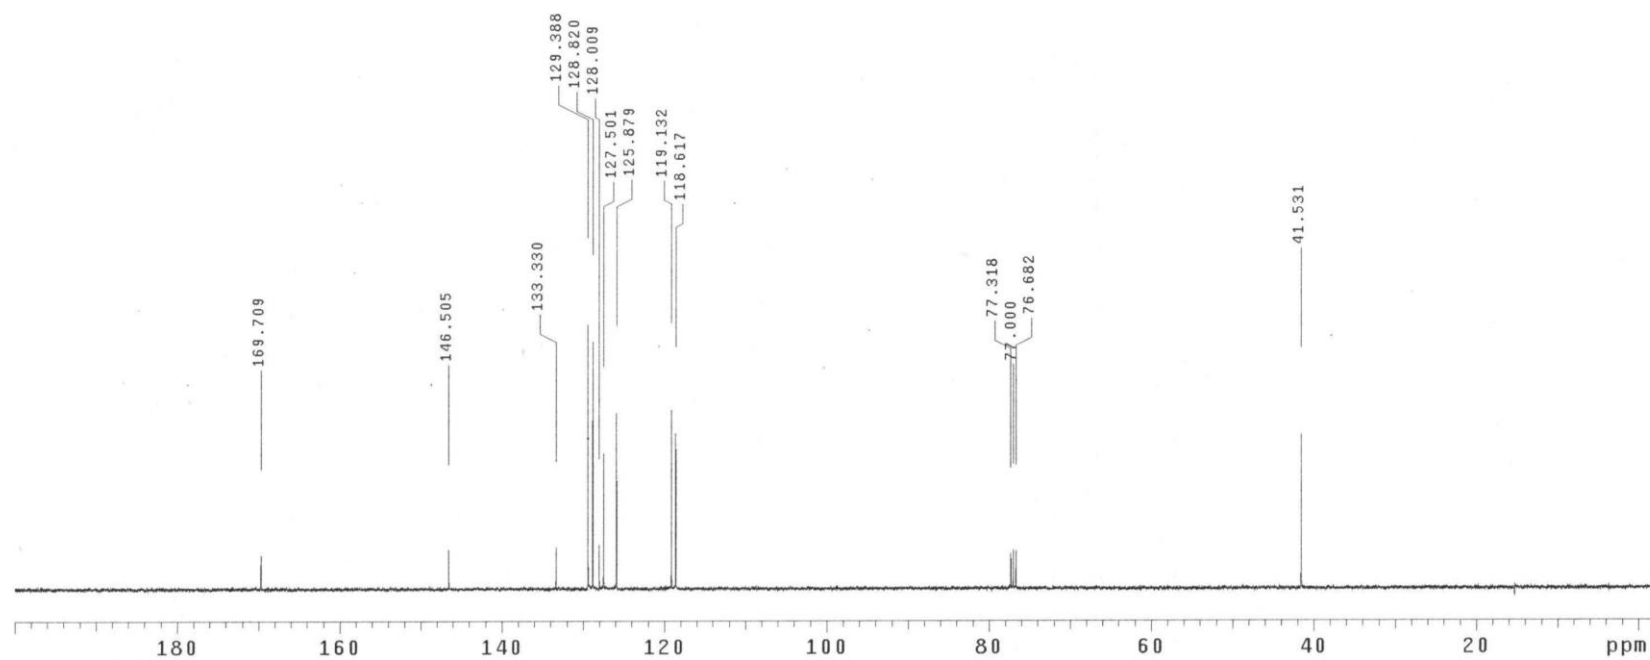

# Compound 4a (<sup>1</sup>H-NMR spectral data-1)

YTN1HP

Pulse Sequence: s2pu1

UNITYplus-400 "unity400"

Date: Dec 21 2017

Solvent: CDCl<sub>3</sub>

Ambient temperature

Total 32 repetitions

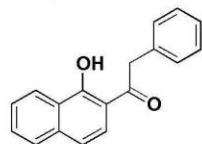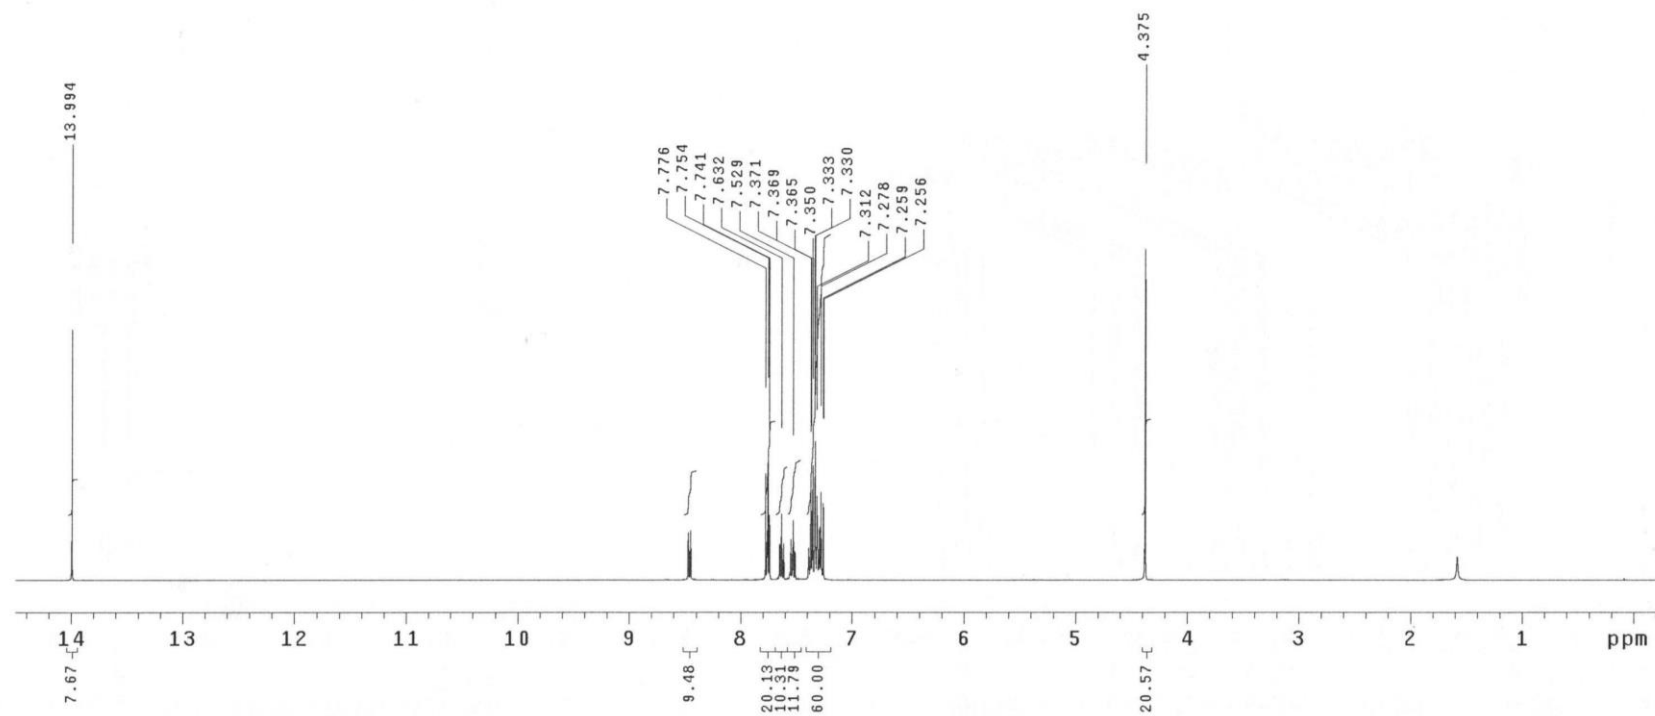

# Compound 4a (<sup>1</sup>H-NMR spectral data-2)

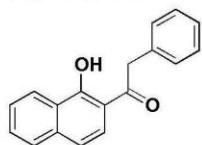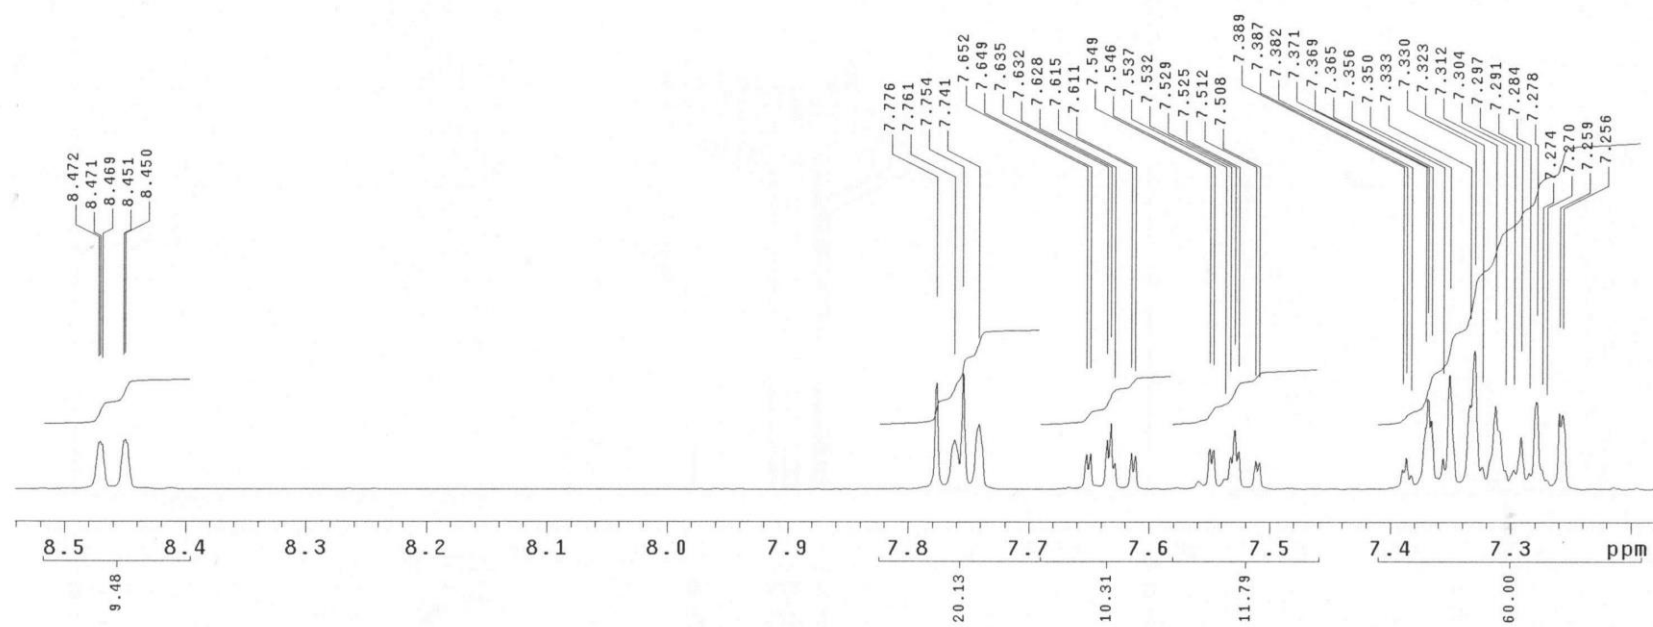

# Compound 4a (<sup>13</sup>C-NMR spectral data)

YTN1HP

Pulse Sequence: s2pul

UNITYplus-400 "unity400"

Date: Dec 21 2017

Solvent: CDCl<sub>3</sub>

Ambient temperature

Total 3216 repetitions

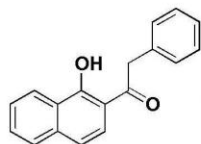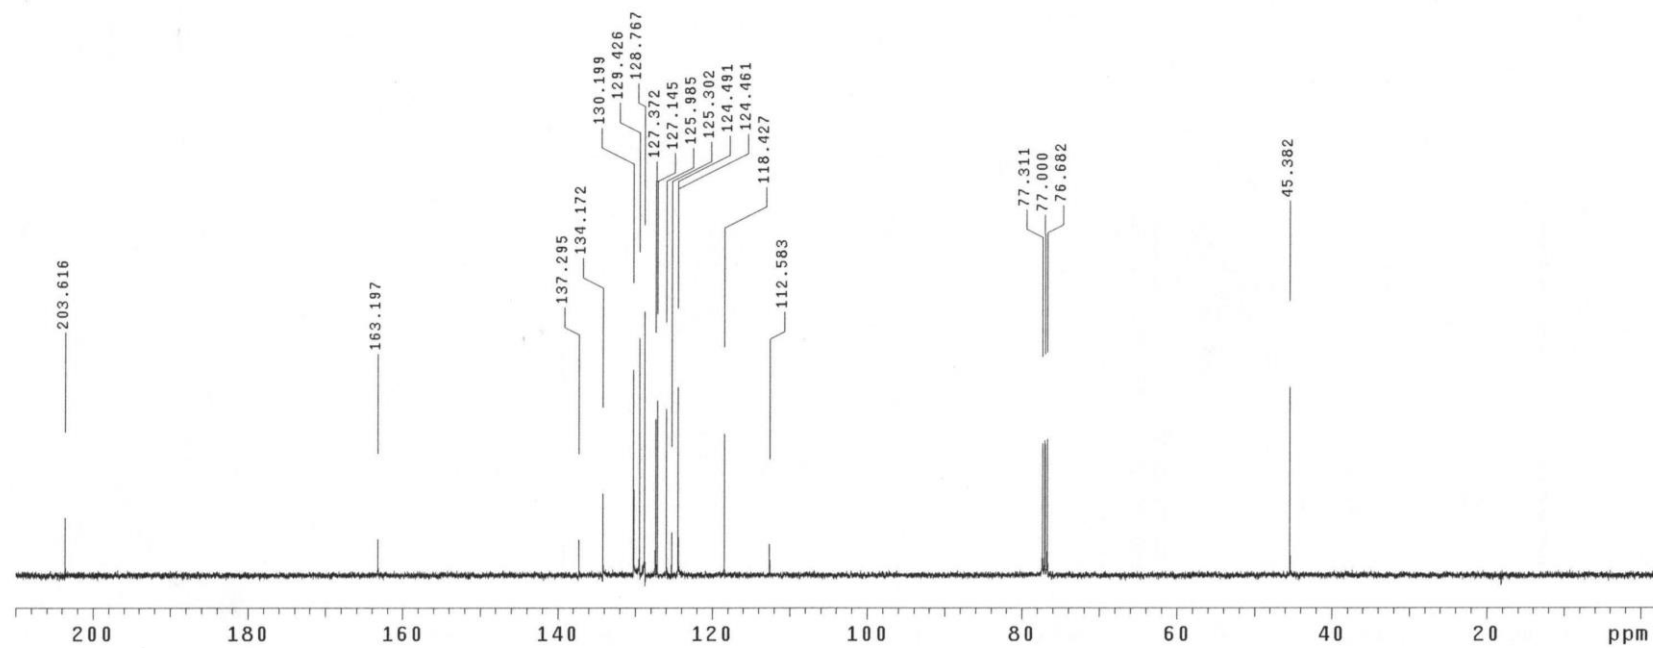



# Compound 4b (<sup>1</sup>H-NMR spectral data-1)

YTN02P

Pulse Sequence: s2pu1  
UNITYplus-400 "unity400"  
Date: Dec 28 2017  
Solvent: CDCl<sub>3</sub>  
Ambient temperature  
Total 32 repetitions

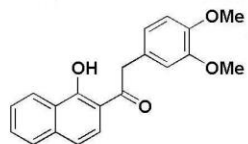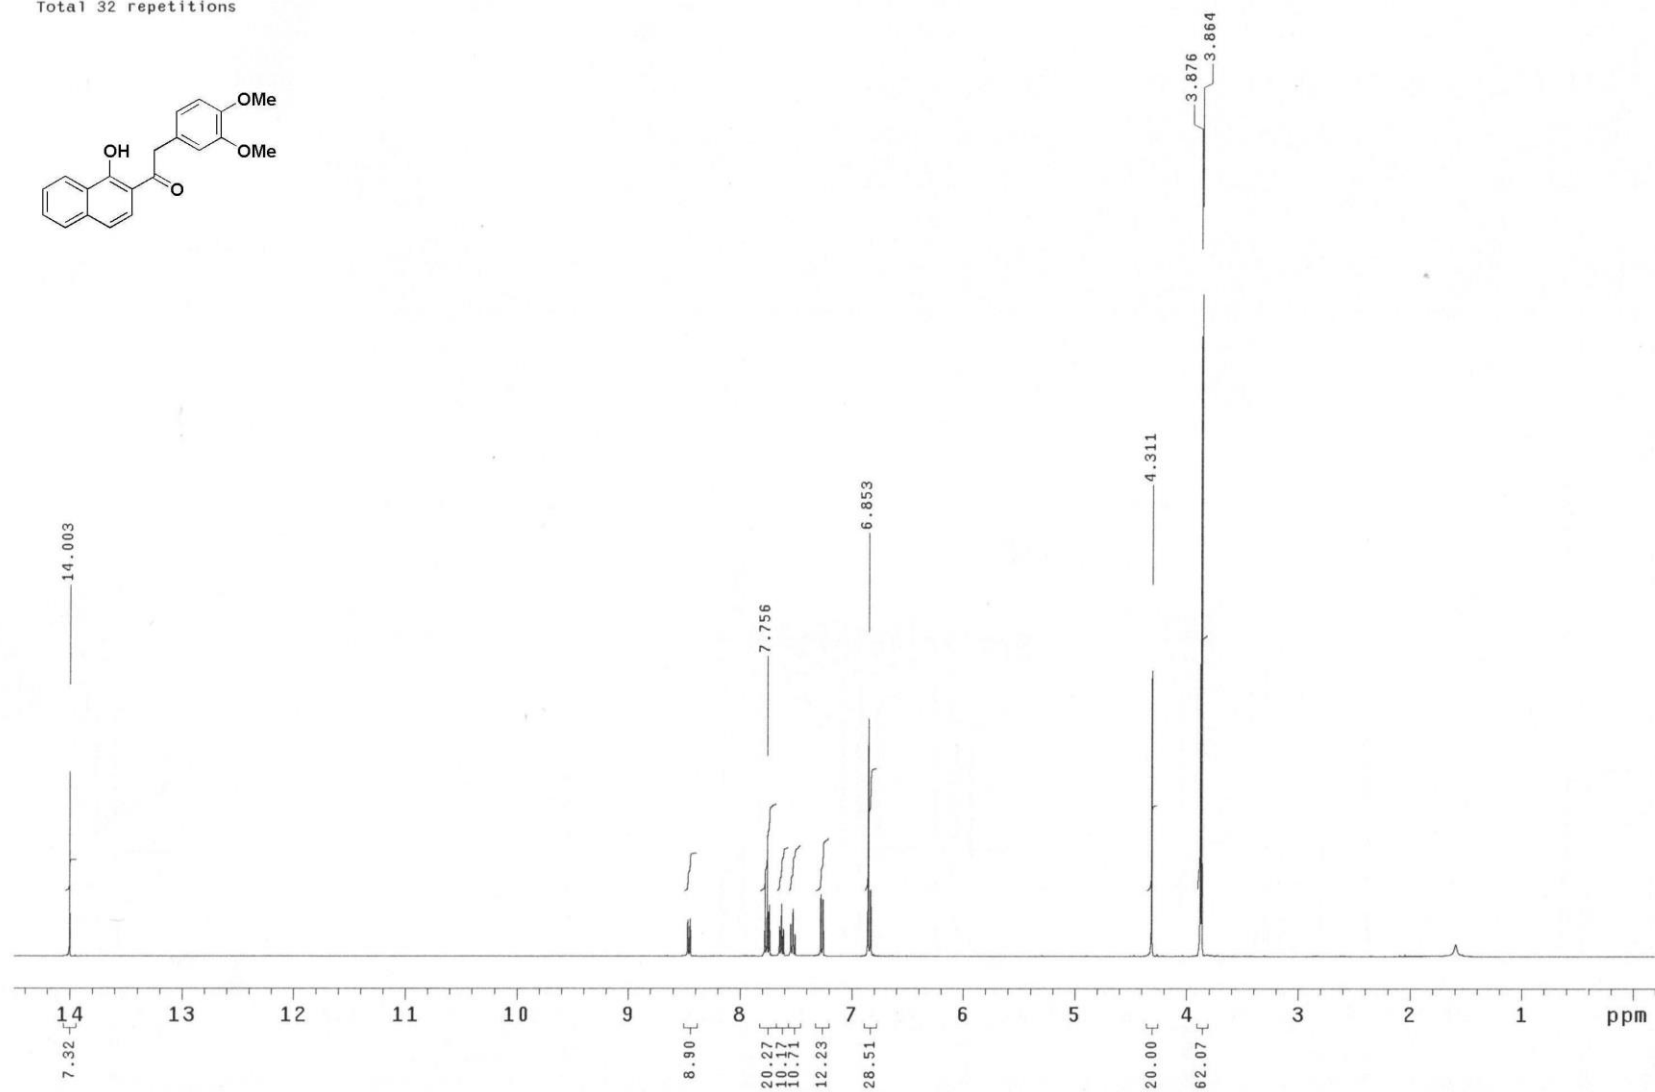

# Compound 4b (<sup>1</sup>H-NMR spectral data-2)

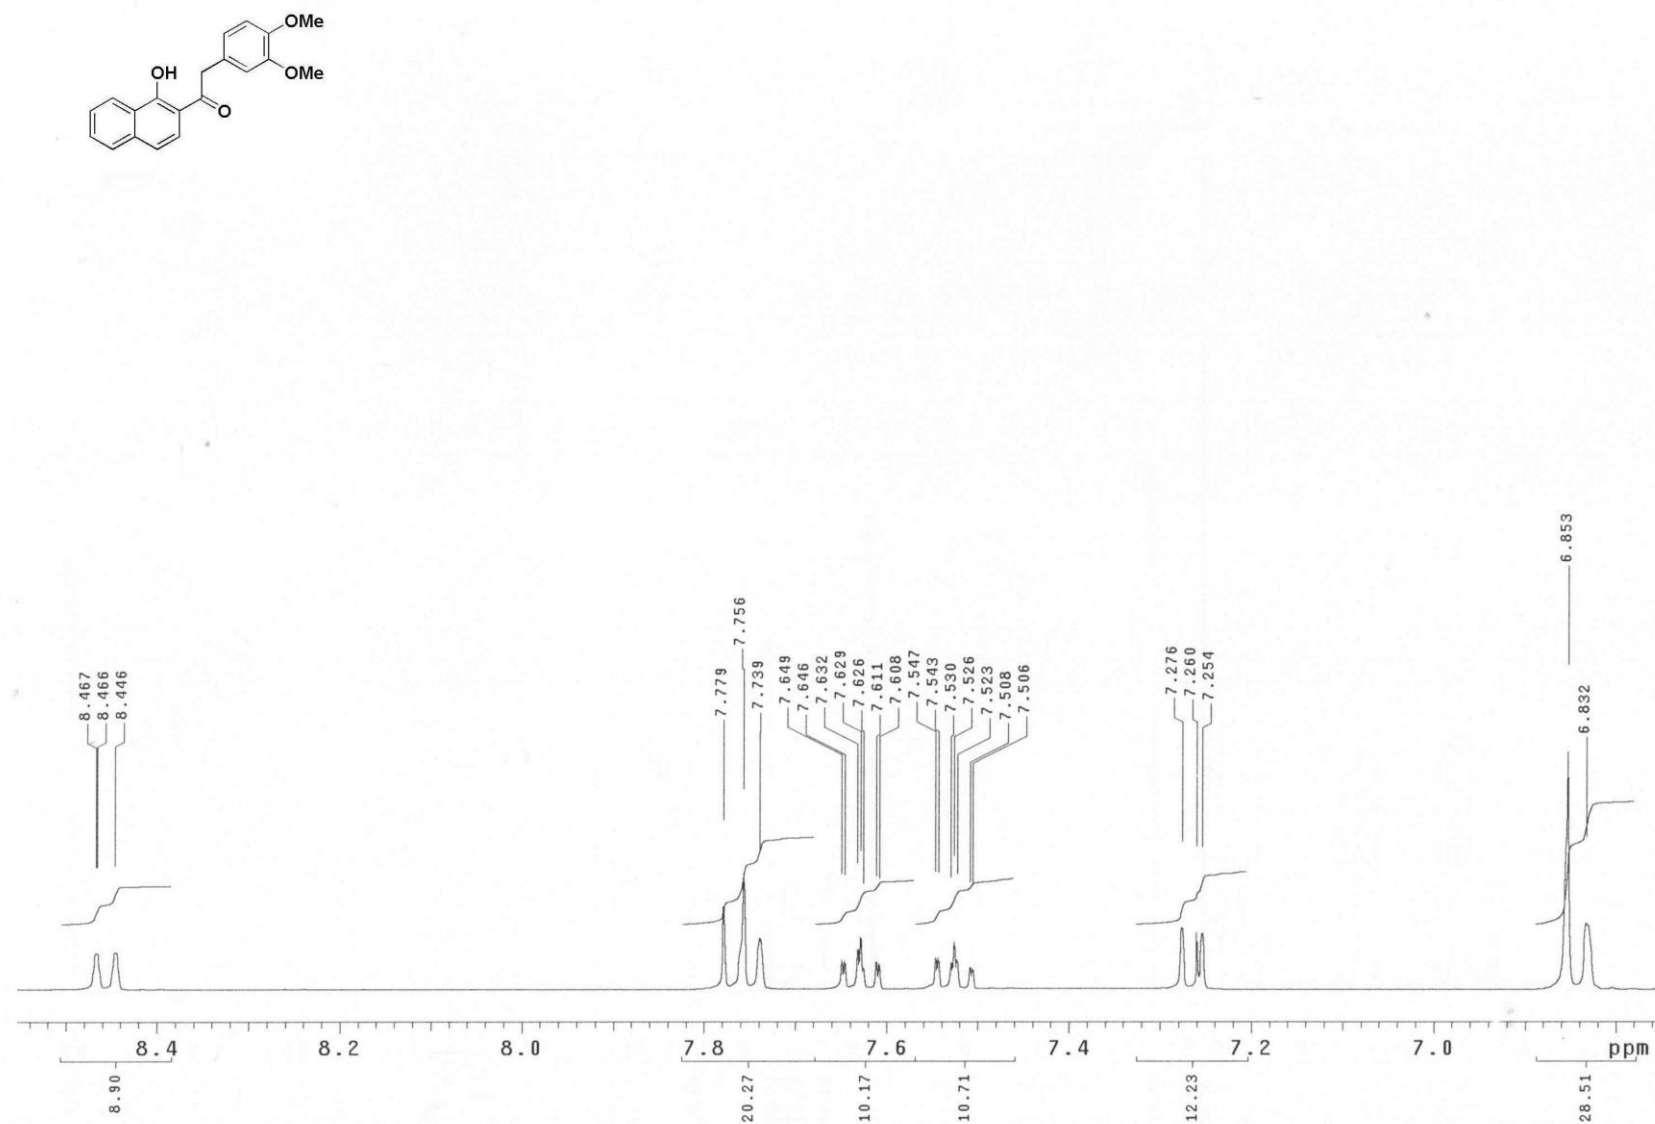

# Compound 4b (<sup>13</sup>C-NMR spectral data)

YTN02P

Pulse Sequence: s2pu1  
UNITYplus-400 "unity400"  
Date: Dec 28 2017  
Solvent: CDCl<sub>3</sub>  
Ambient temperature  
Total 2048 repetitions

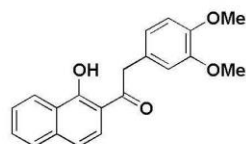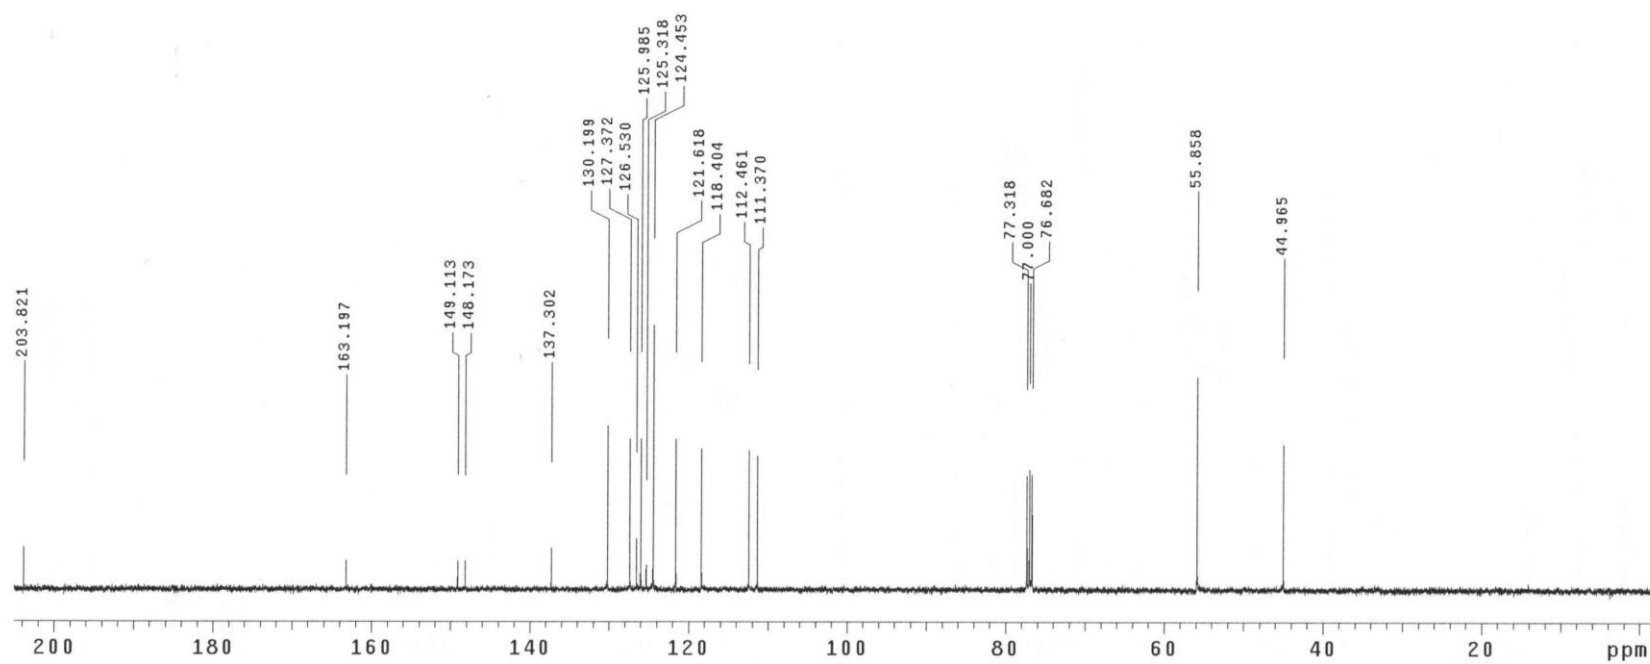

# Compound 4c (<sup>1</sup>H-NMR spectral data)

YTN4FP

Pulse Sequence: s2pu1

UNITYplus-400 "unity400"

Date: Jan 12 2018

Solvent: CDCl<sub>3</sub>

Ambient temperature

Total 32 repetitions

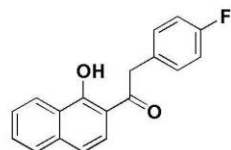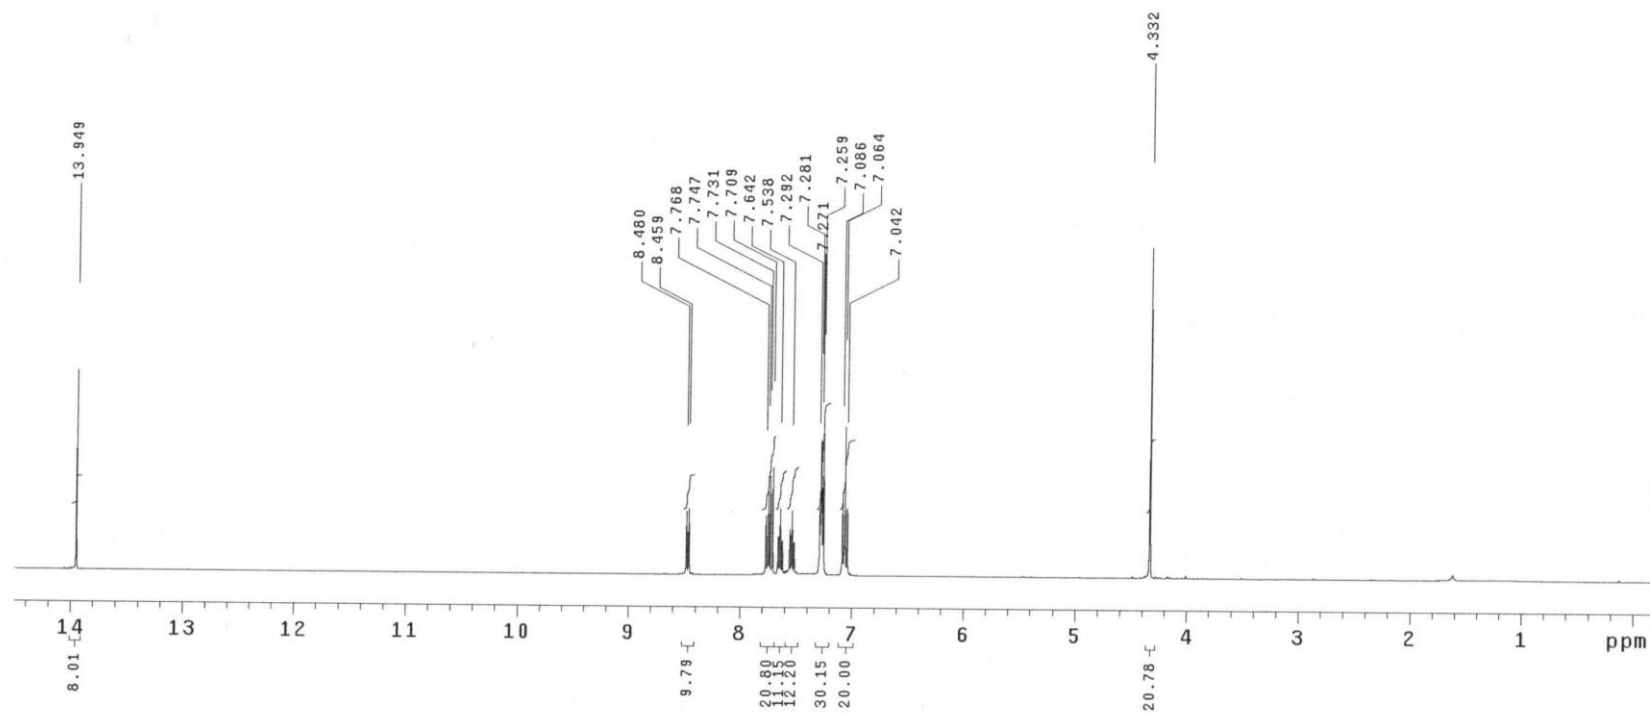

# Compound 4c (<sup>13</sup>C-NMR spectral data)

YTN4FP

Pulse Sequence: s2pu1  
UNITYplus-400 "unity400"  
Date: Jan 12 2018  
Solvent: CDCl<sub>3</sub>  
Ambient temperature  
Total 672 repetitions

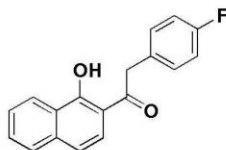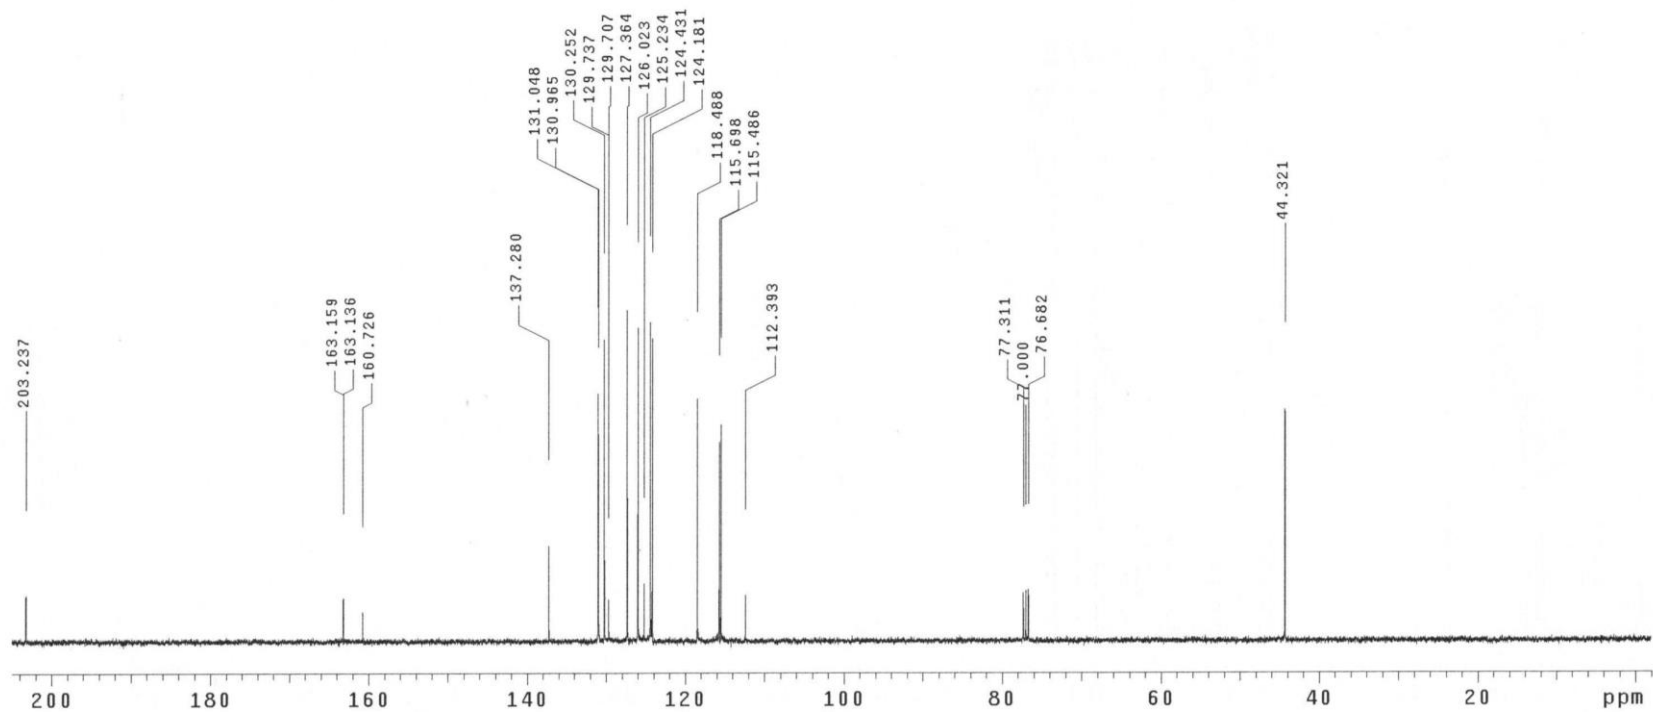

# Compound 4d (<sup>1</sup>H-NMR spectral data-1)

YTN4MeP

Pulse Sequence: s2pu1  
UNITYplus-400 "unity400"  
Date: Jan 19 2018  
Solvent: CDCl<sub>3</sub>  
Ambient temperature  
Total 32 repetitions

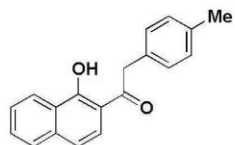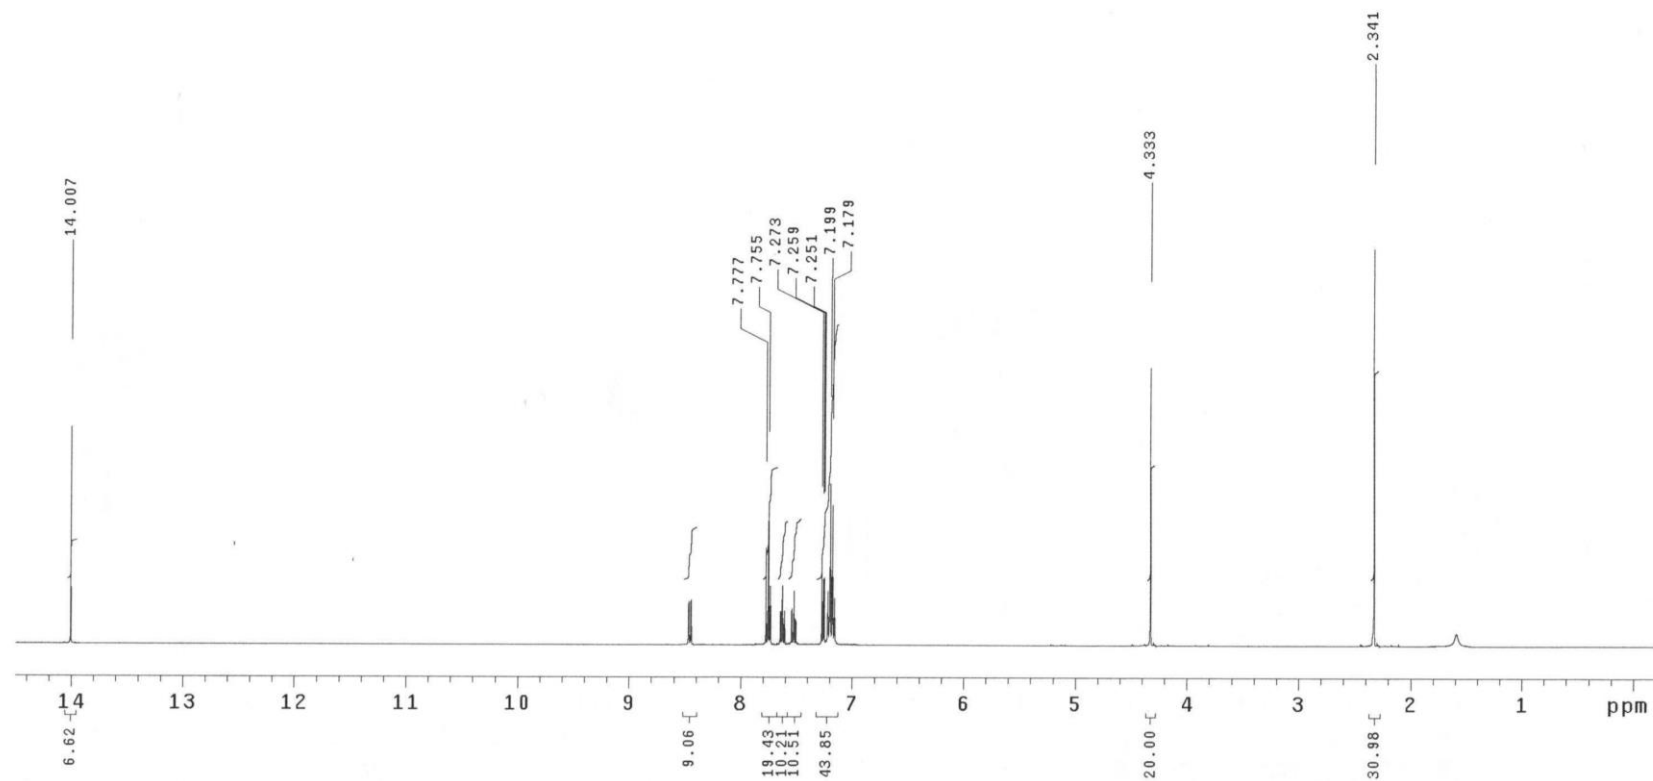

# Compound 4d (<sup>1</sup>H-NMR spectral data-2)

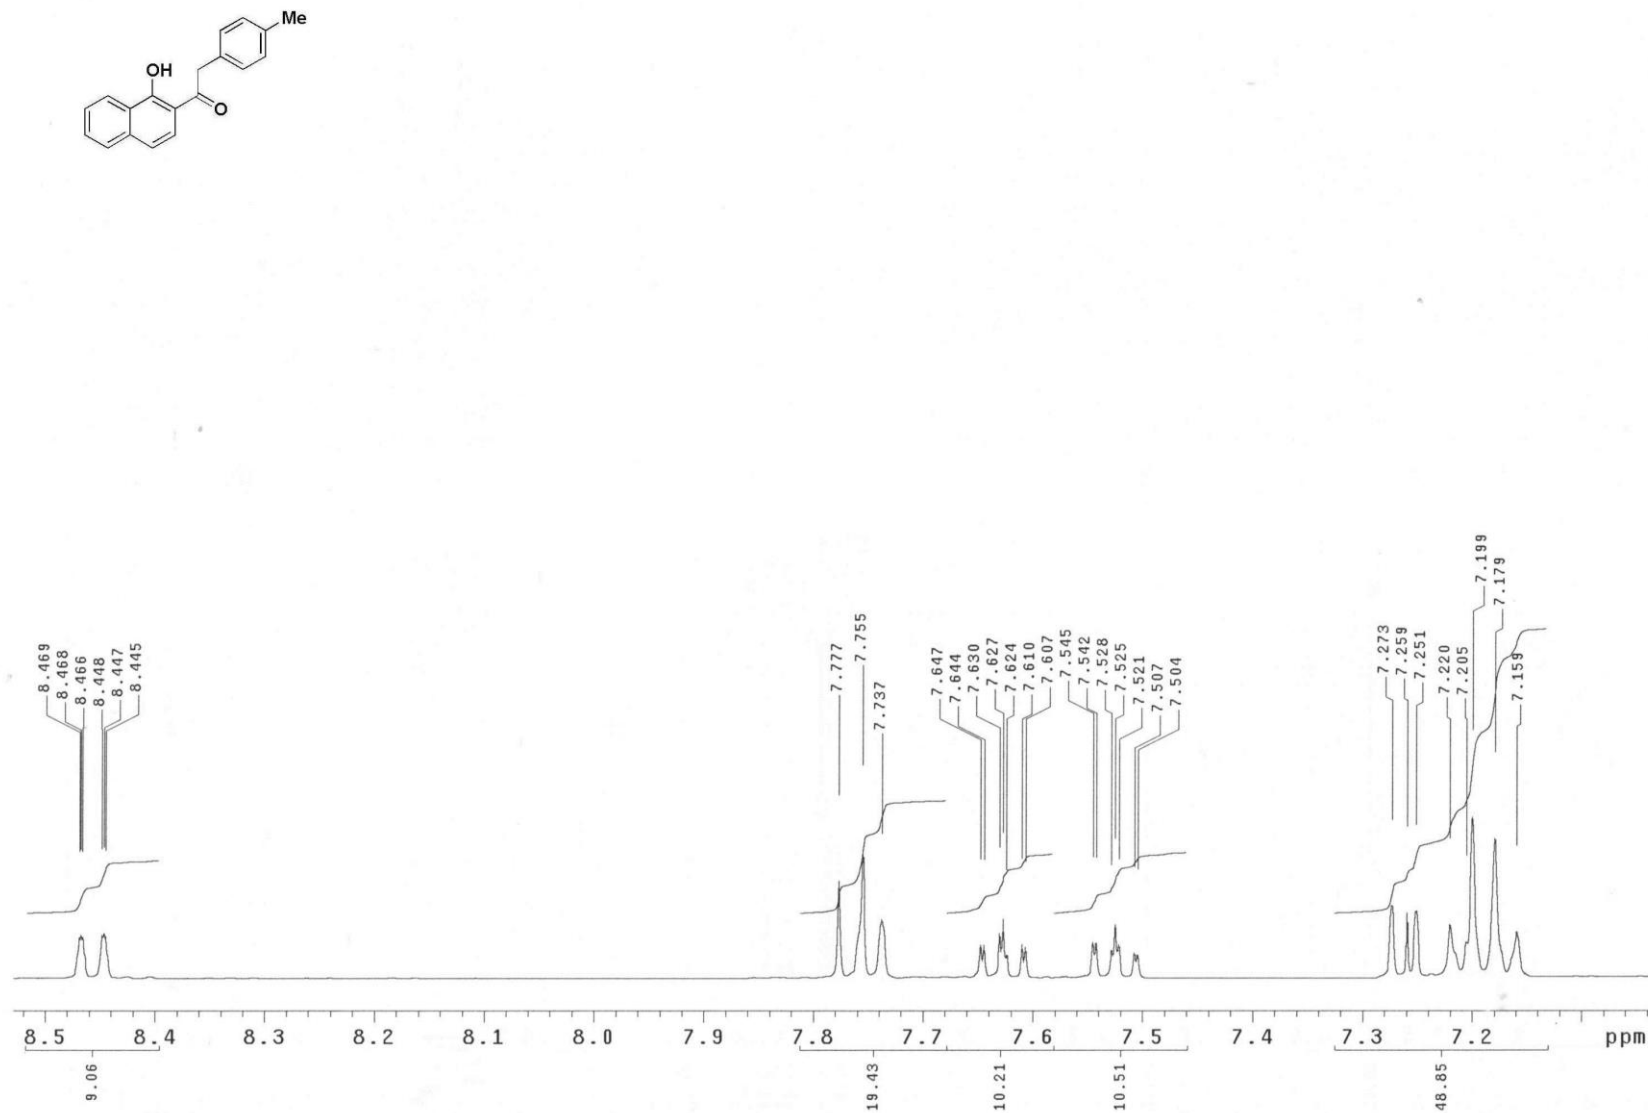

# Compound 4d (<sup>13</sup>C-NMR spectral data-1)

YTN4MeP

Pulse Sequence: s2pu1

UNITYplus-400 "unity400"

Date: Jan 19 2018

Solvent: CDCl<sub>3</sub>

Ambient temperature

Total 2304 repetitions

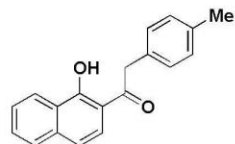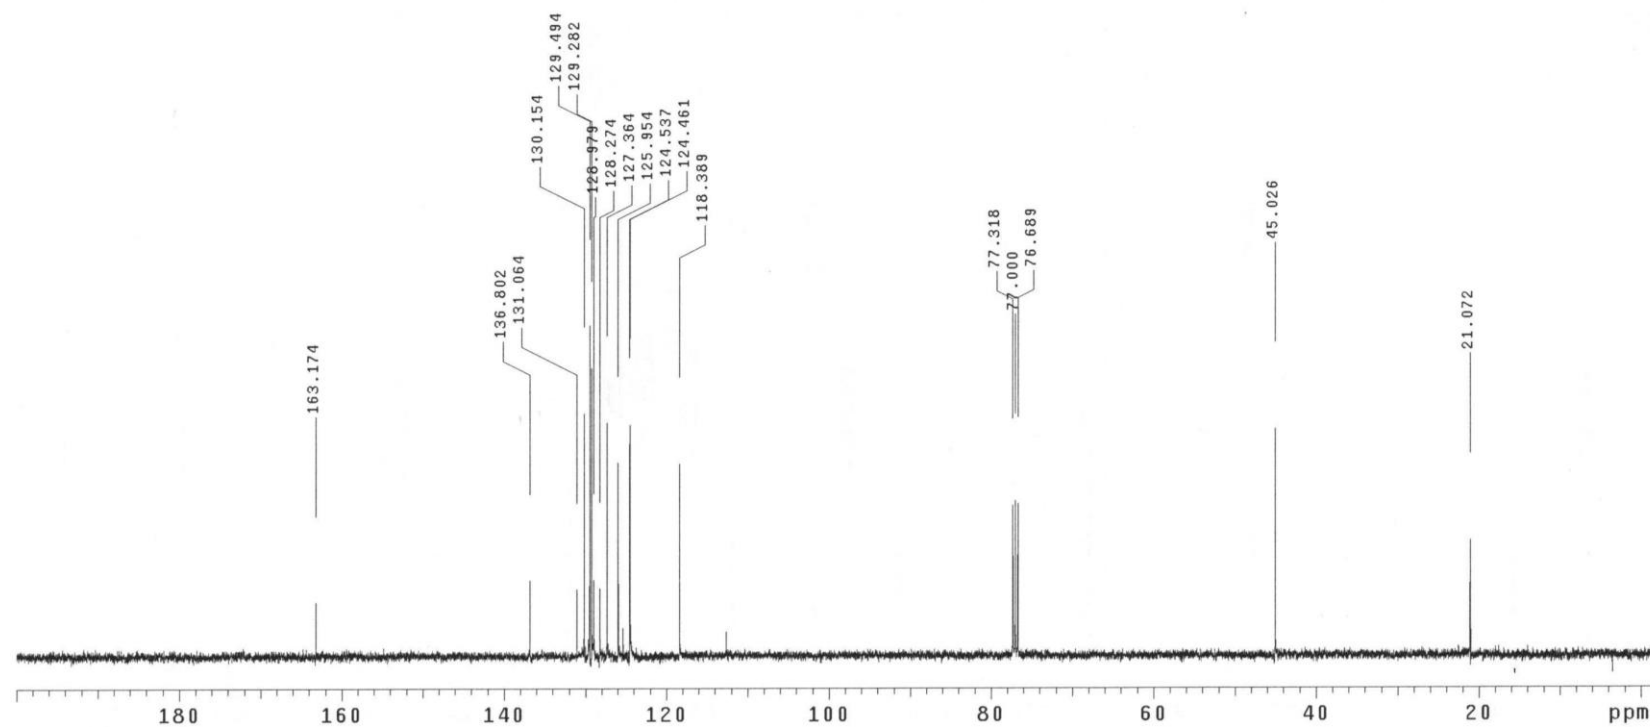



# Compound 4d ( $^{13}\text{C}$ -NMR spectral data-2)

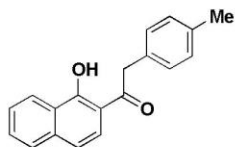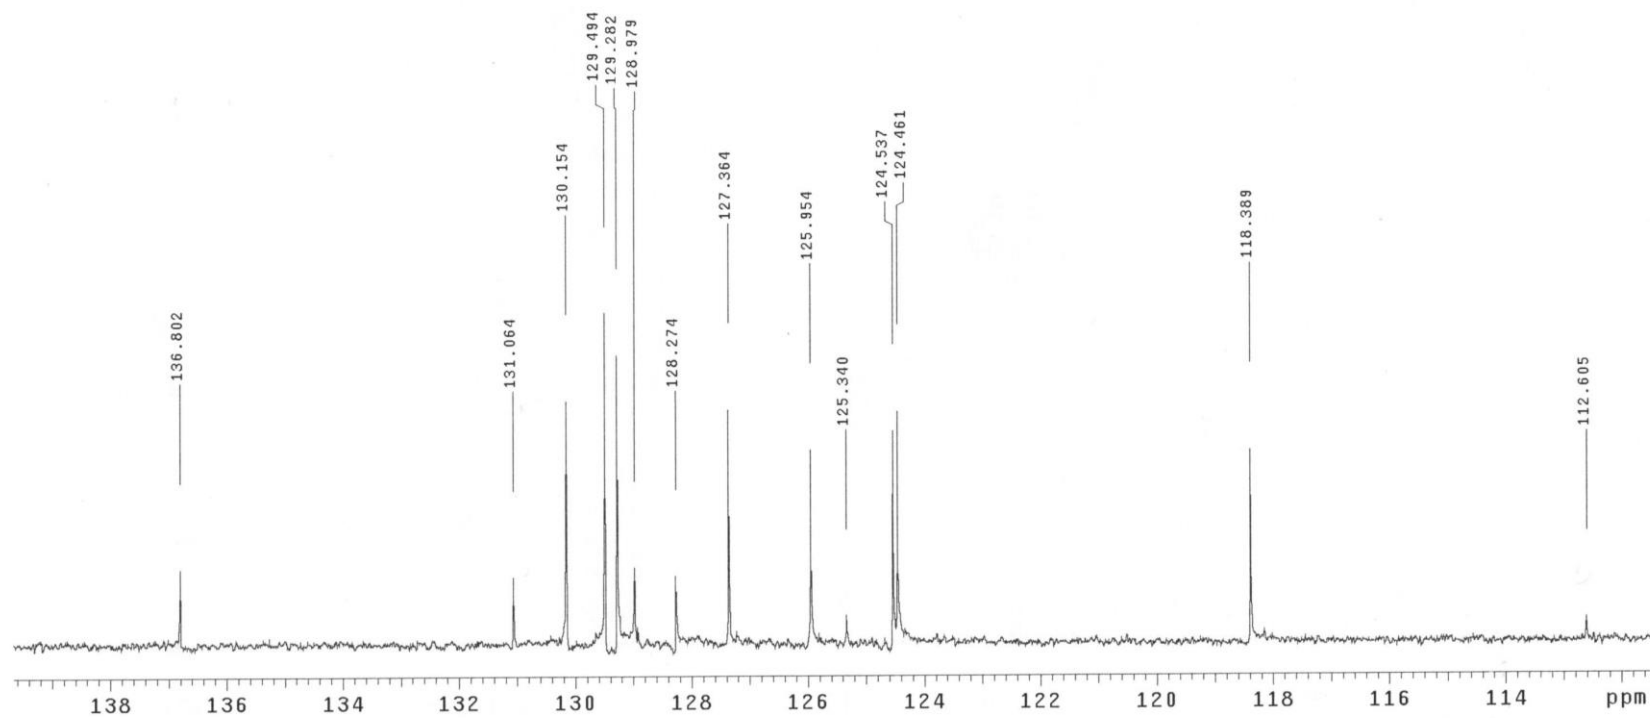

# Compound 4e (<sup>1</sup>H-NMR spectral data)

YT4PhP

Pulse Sequence: s2pu1

UNITYplus-400 "unity400"

Date: Apr 17 2018

Solvent: CDCl<sub>3</sub>

Ambient temperature

Total 32 repetitions

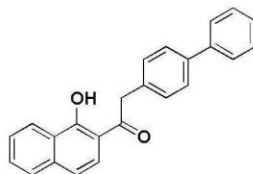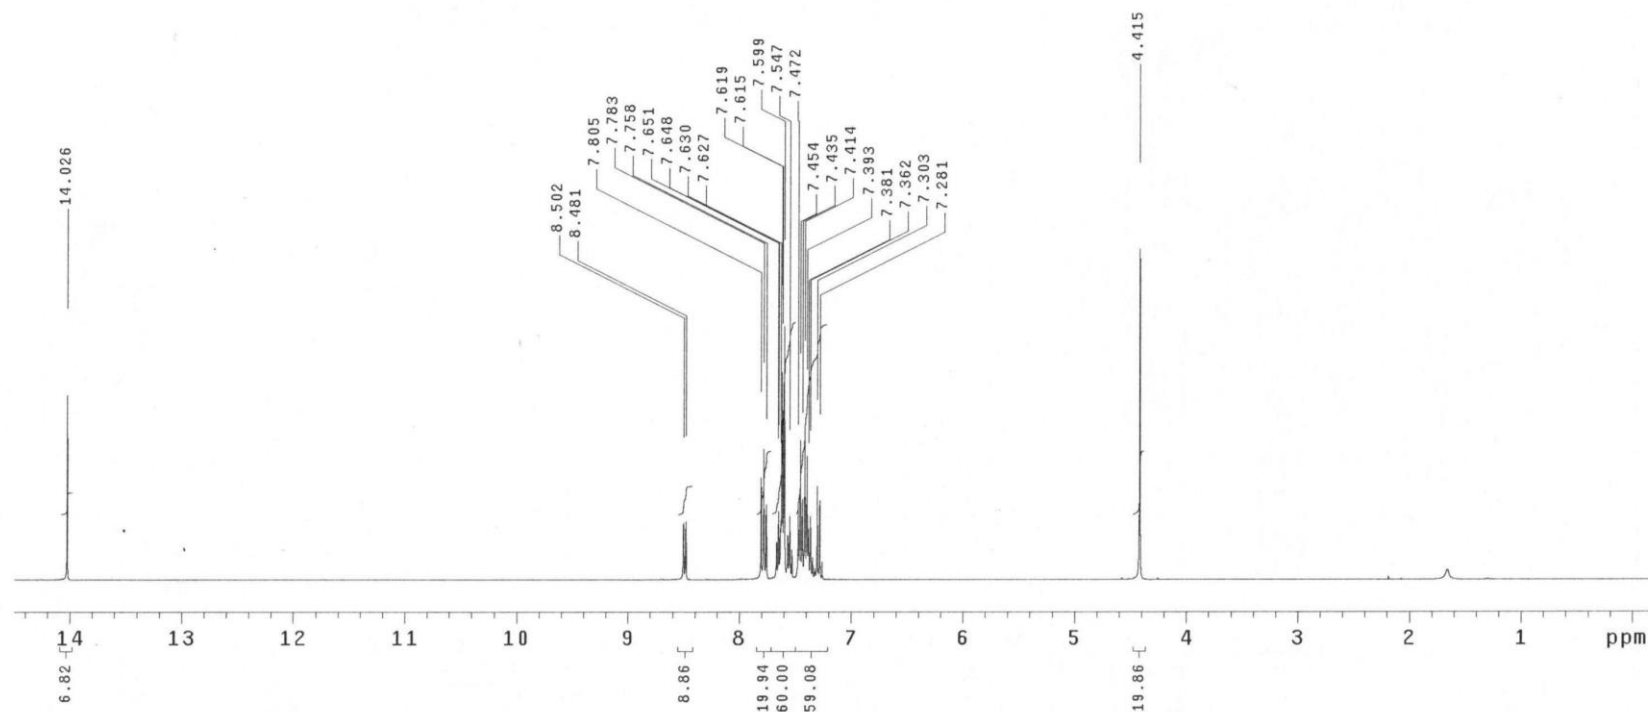

# Compound 4e ( $^{13}\text{C}$ -NMR spectral data)

YT4PhP

Pulse Sequence: s2pu1

UNITYplus-400 "unity400"

Date: Apr 17 2018

Solvent: CDCl<sub>3</sub>

Ambient temperature

Total 448 repetitions

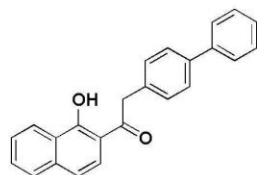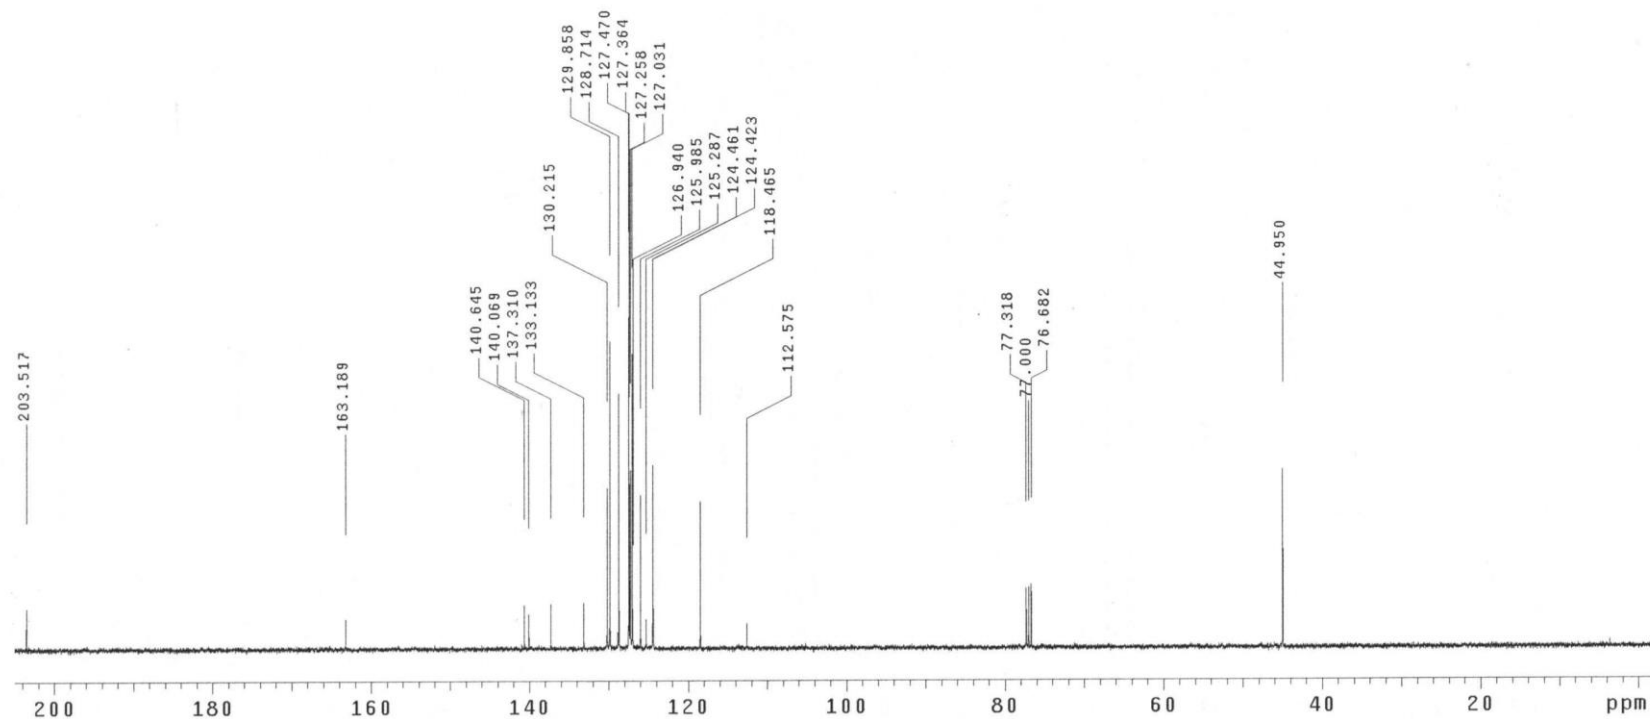

# Compound 4f (<sup>1</sup>H-NMR spectral data)

SH02P

Pulse Sequence: s2pu1

UNITYplus-400 "unity400"

Date: May 10 2018

Solvent: CDCl<sub>3</sub>

Ambient temperature

Total 32 repetitions

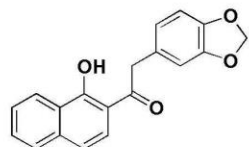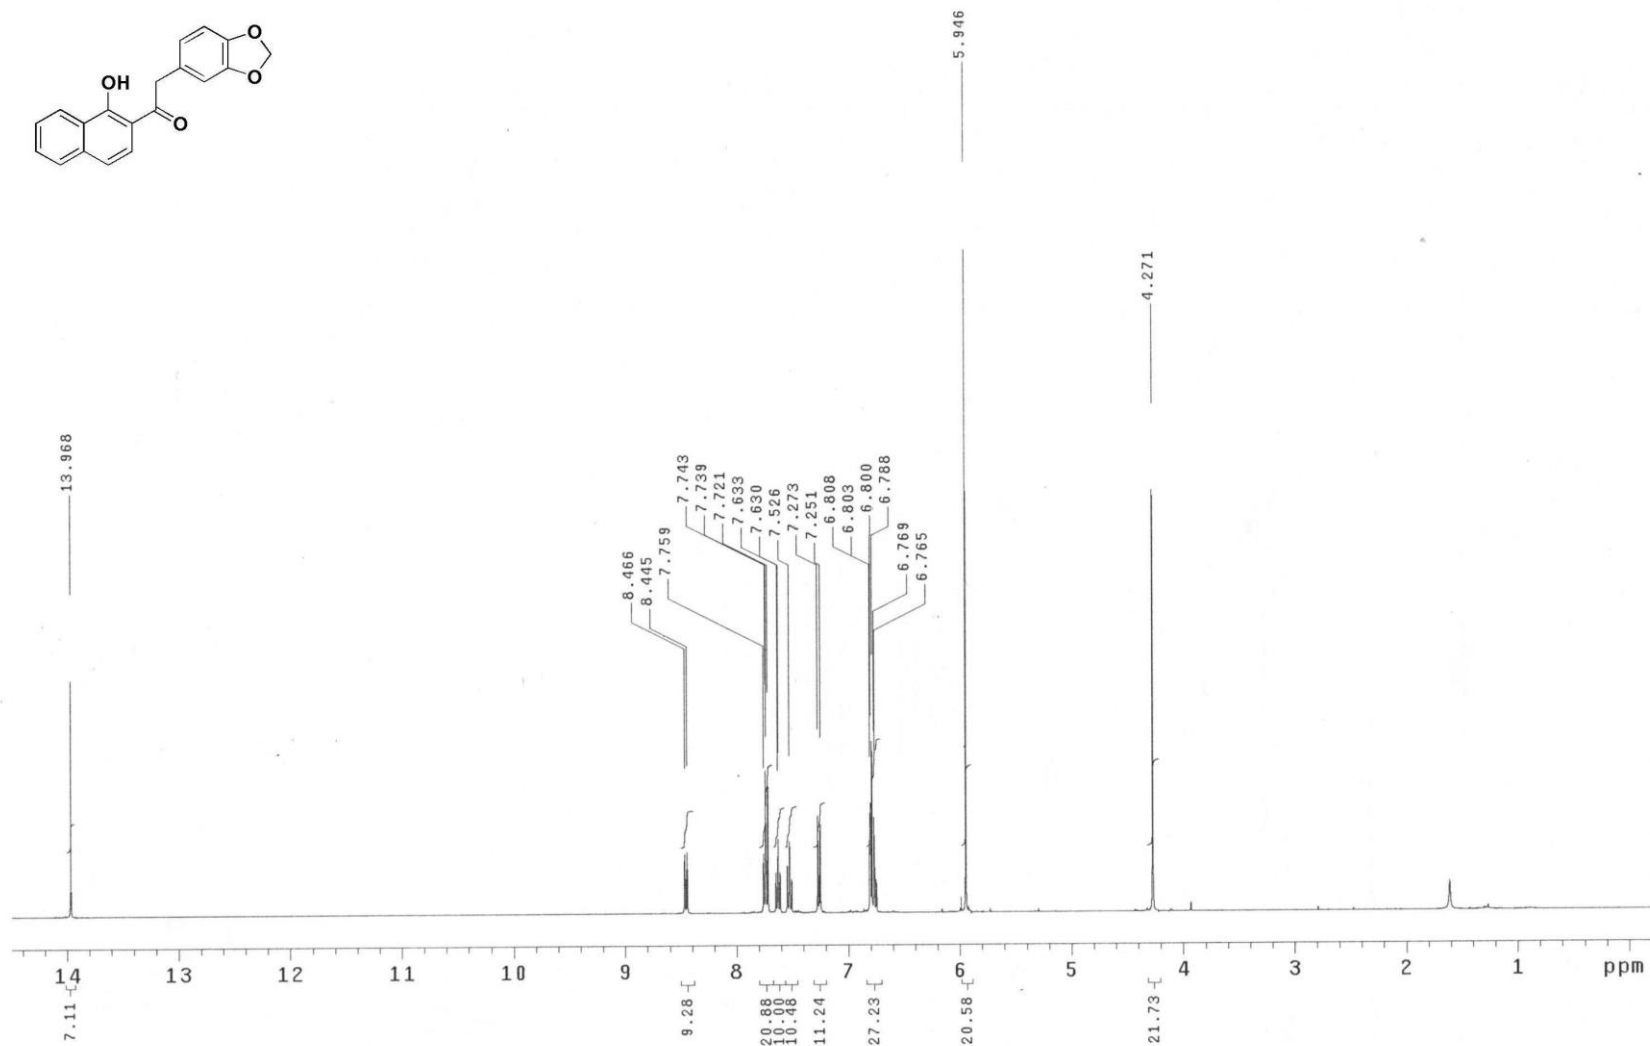

# Compound 4f (<sup>13</sup>C-NMR spectral data)

SH02P

Pulse Sequence: s2pu1  
UNITYplus-400 "unity400"  
Date: May 10 2018  
Solvent: CDCl<sub>3</sub>  
Ambient temperature  
Total 752 repetitions

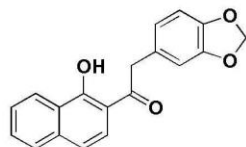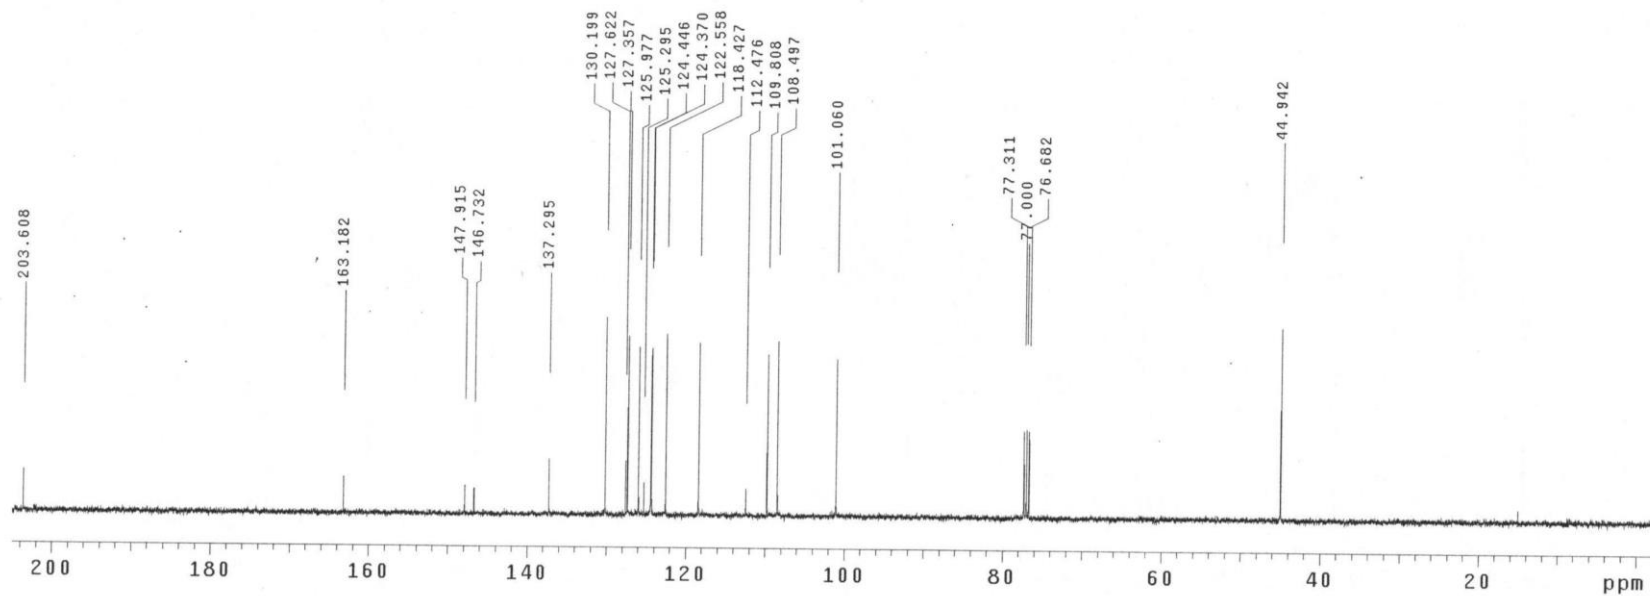

# Compound 4g (<sup>1</sup>H-NMR spectral data)

YT1NASP

Pulse Sequence: s2pu1

UNITYplus-400 "unity400"

Date: Apr 27 2018

Solvent: CDCl<sub>3</sub>

Ambient temperature

Total 32 repetitions

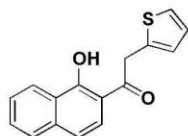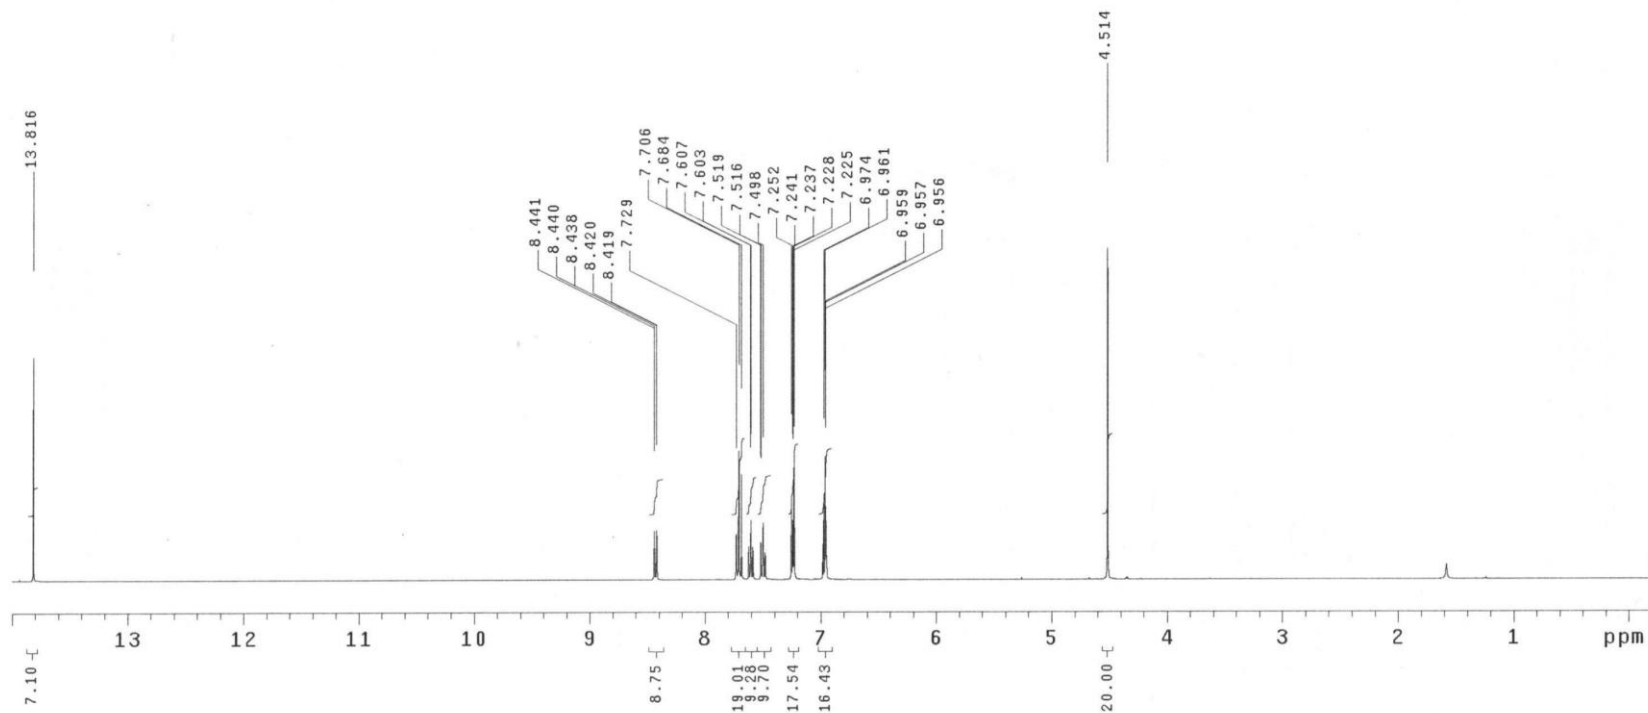

# Compound 4g (<sup>13</sup>C-NMR spectral data)

YT1NASP

Pulse Sequence: s2pu1

UNITYplus-400 "unity400"

Date: Apr 27 2018

Solvent: CDCl<sub>3</sub>

Ambient temperature

Total 480 repetitions

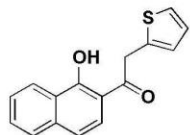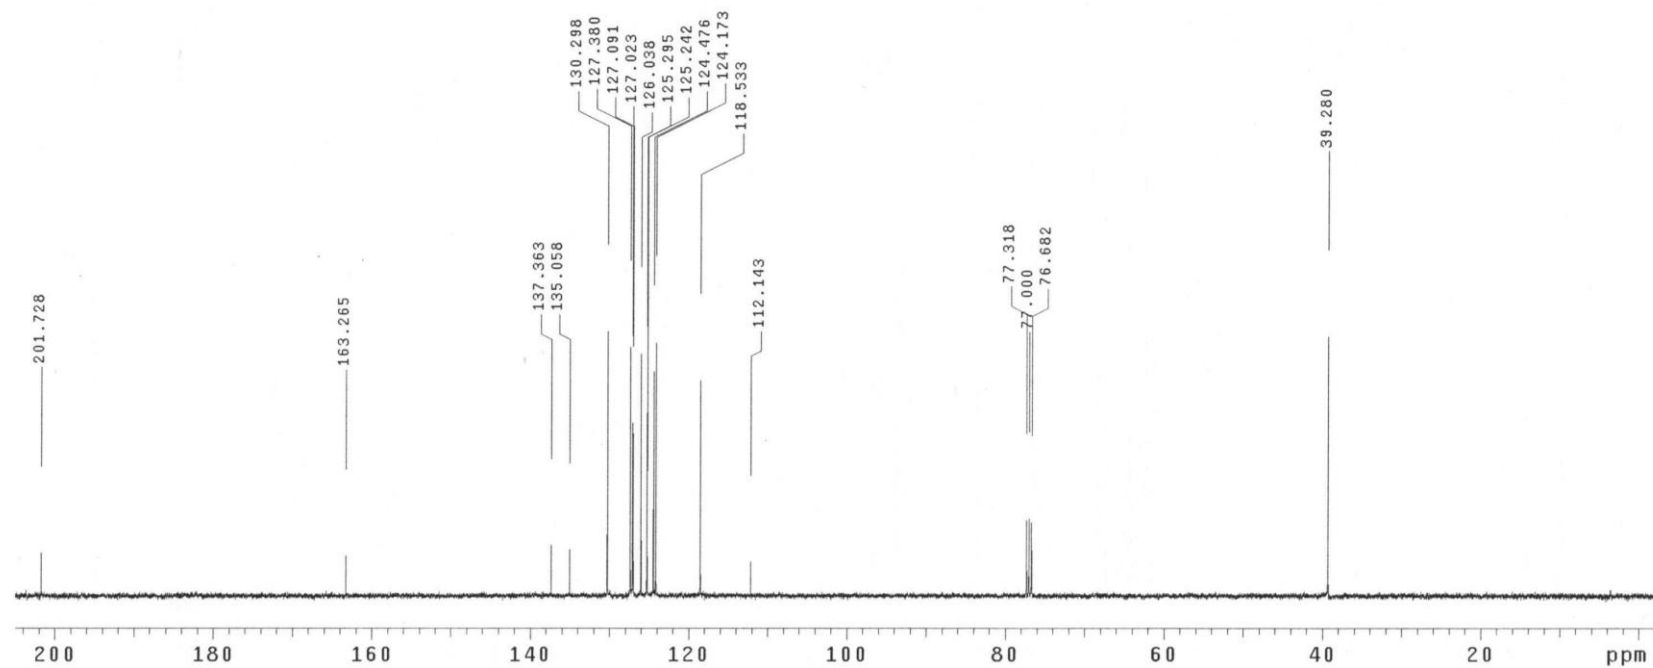

# Compound 4h (<sup>1</sup>H-NMR spectral data)

YT1NBrP

Pulse Sequence: s2pu1

UNITYplus-400 "unity400"

Date: Apr 26 2018

Solvent: CDCl<sub>3</sub>

Ambient temperature

Total 32 repetitions

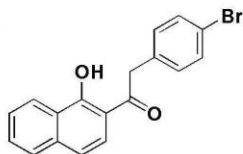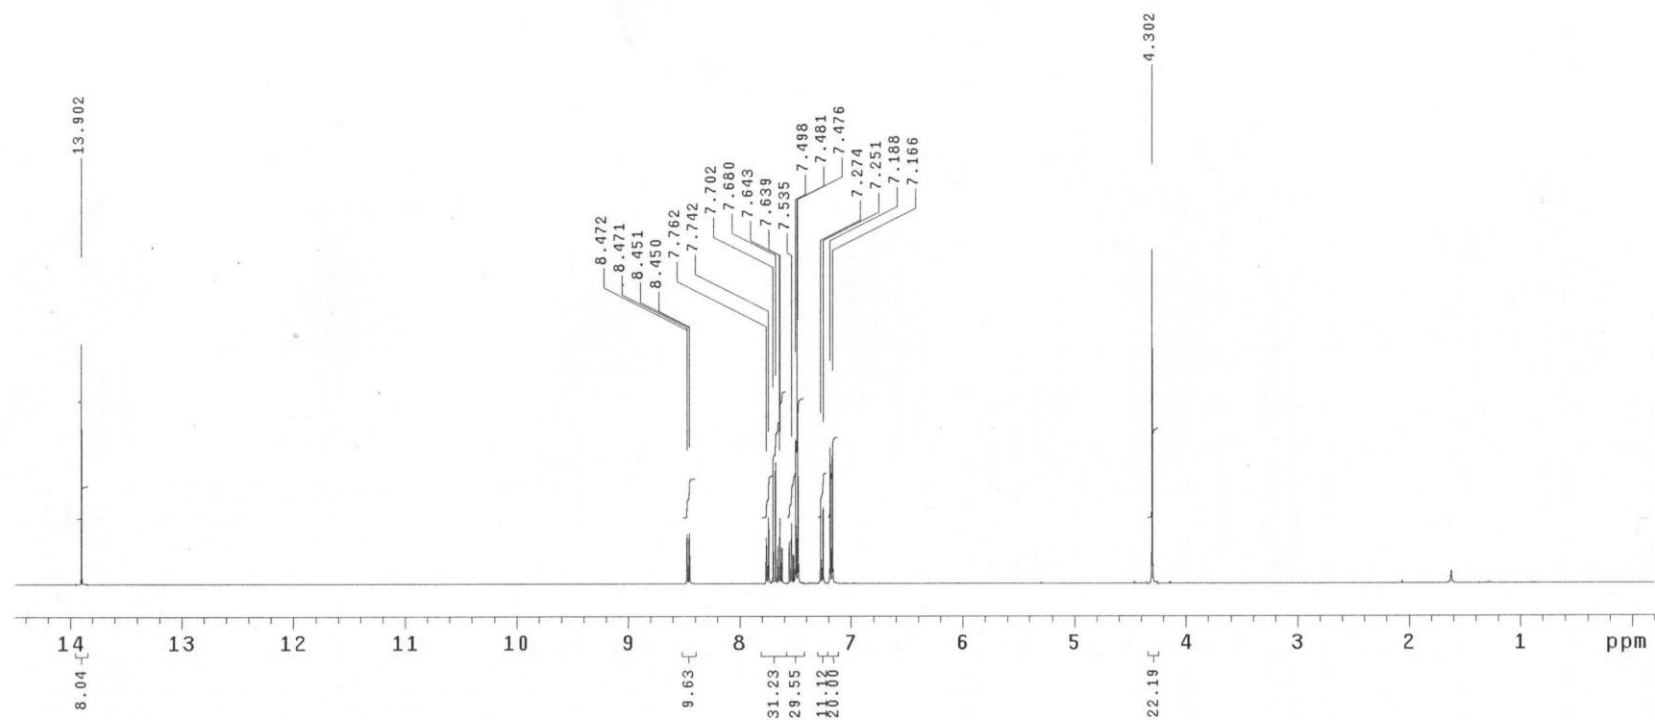



# Compound 4h (<sup>13</sup>C-NMR spectral data)

YT1NBrP

Pulse Sequence: s2pu1

UNITYplus-400 "unity400"

Date: Apr 26 2018

Solvent: CDCl<sub>3</sub>

Ambient temperature

Total 720 repetitions

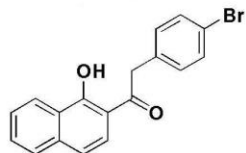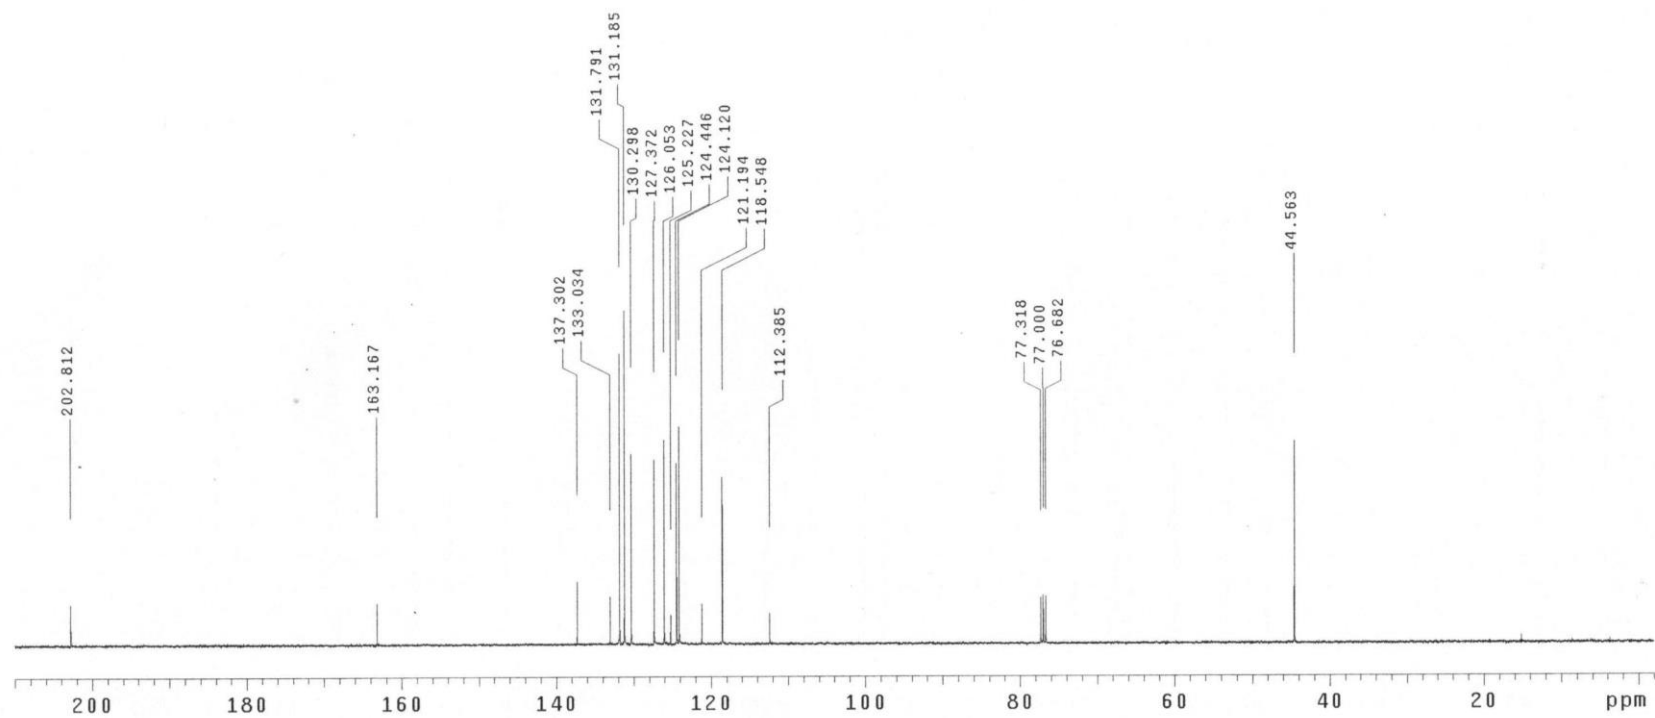

# Compound 4i (<sup>1</sup>H-NMR spectral data)

YT2FP

Pulse Sequence: s2pu1

UNITYplus-400 "unity400"

Date: May 11 2018

Solvent: CDCl<sub>3</sub>

Ambient temperature

Total 32 repetitions

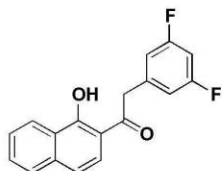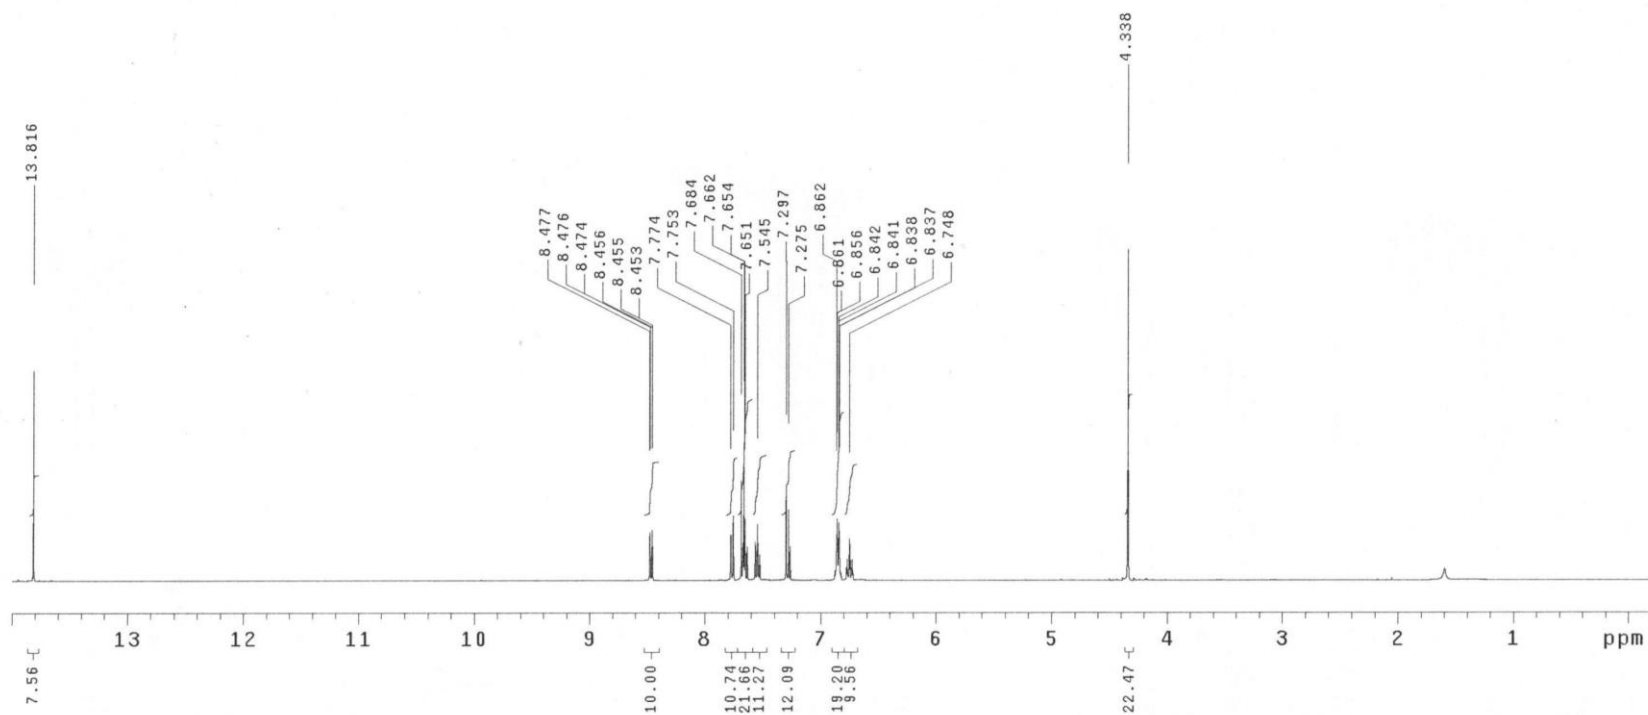

# Compound 4i (<sup>13</sup>C-NMR spectral data)

YT2FP

Pulse Sequence: s2pu1

UNITYplus-400 "unity400"

Date: May 11 2018

Solvent: CDCl<sub>3</sub>

Ambient temperature

Total 1280 repetitions

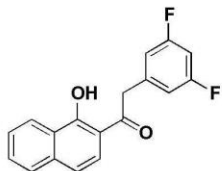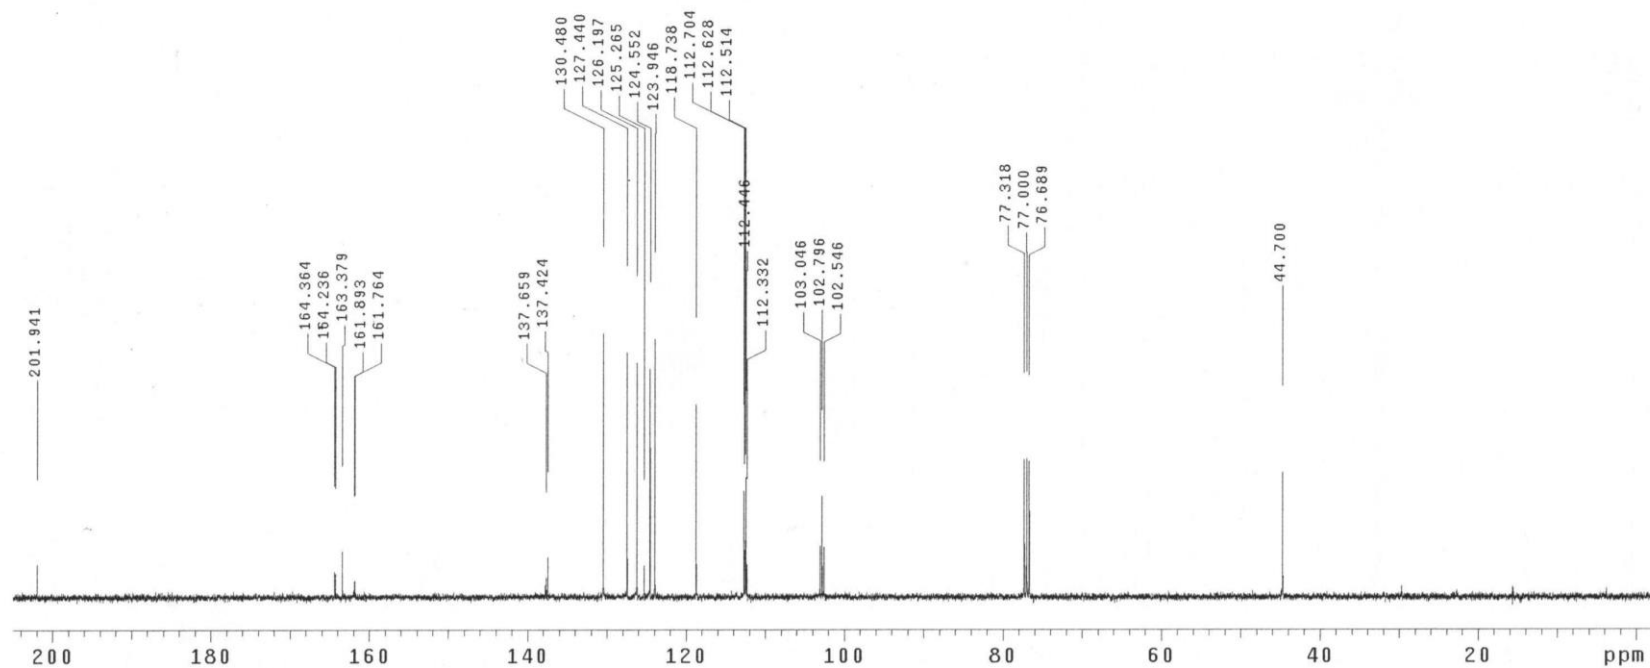

# Compound 4j (<sup>1</sup>H-NMR spectral data)

YTCF3P

Pulse Sequence: s2pu1

UNITYplus-400 "unity400"

Date: May 31 2018

Solvent: CDCl<sub>3</sub>

Ambient temperature

Total 32 repetitions

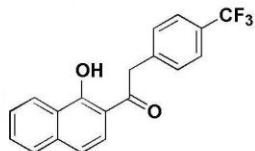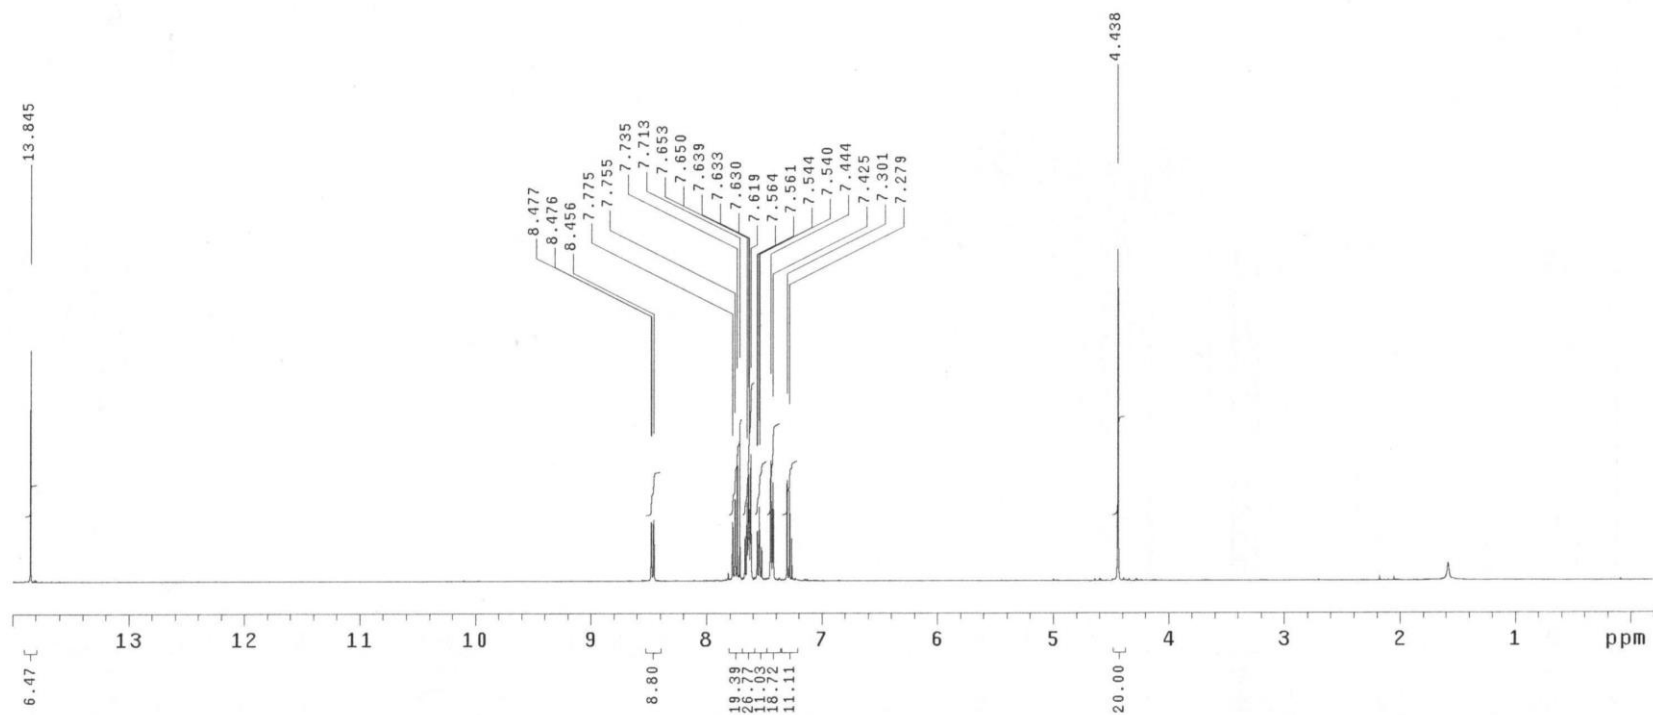

# Compound 4j (<sup>13</sup>C-NMR spectral data)

YTCF3P

Pulse Sequence: s2pu1

UNITYplus-400 "unity400"

Date: May 31 2018

Solvent: CDCl<sub>3</sub>

Ambient temperature

Total 1808 repetitions

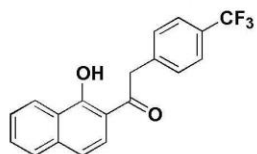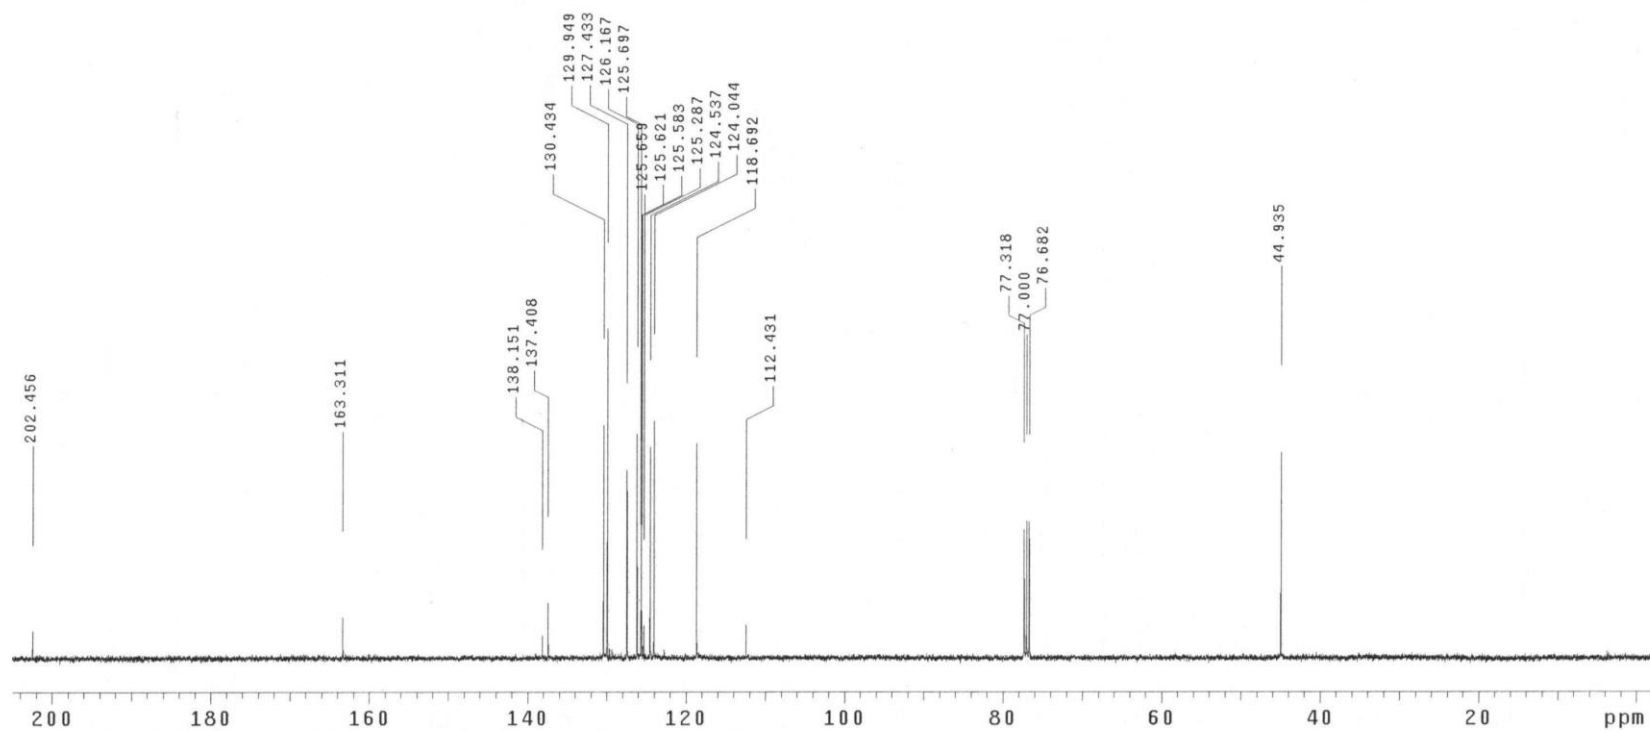

# Compound 4k (<sup>1</sup>H-NMR spectral data)

YT1NAP

Pulse Sequence: s2pu1

UNITYplus-400 "unity400"

Date: May 25 2018

Solvent: CDCl<sub>3</sub>

Ambient temperature

Total 32 repetitions

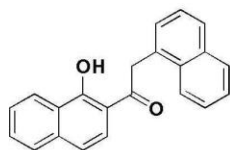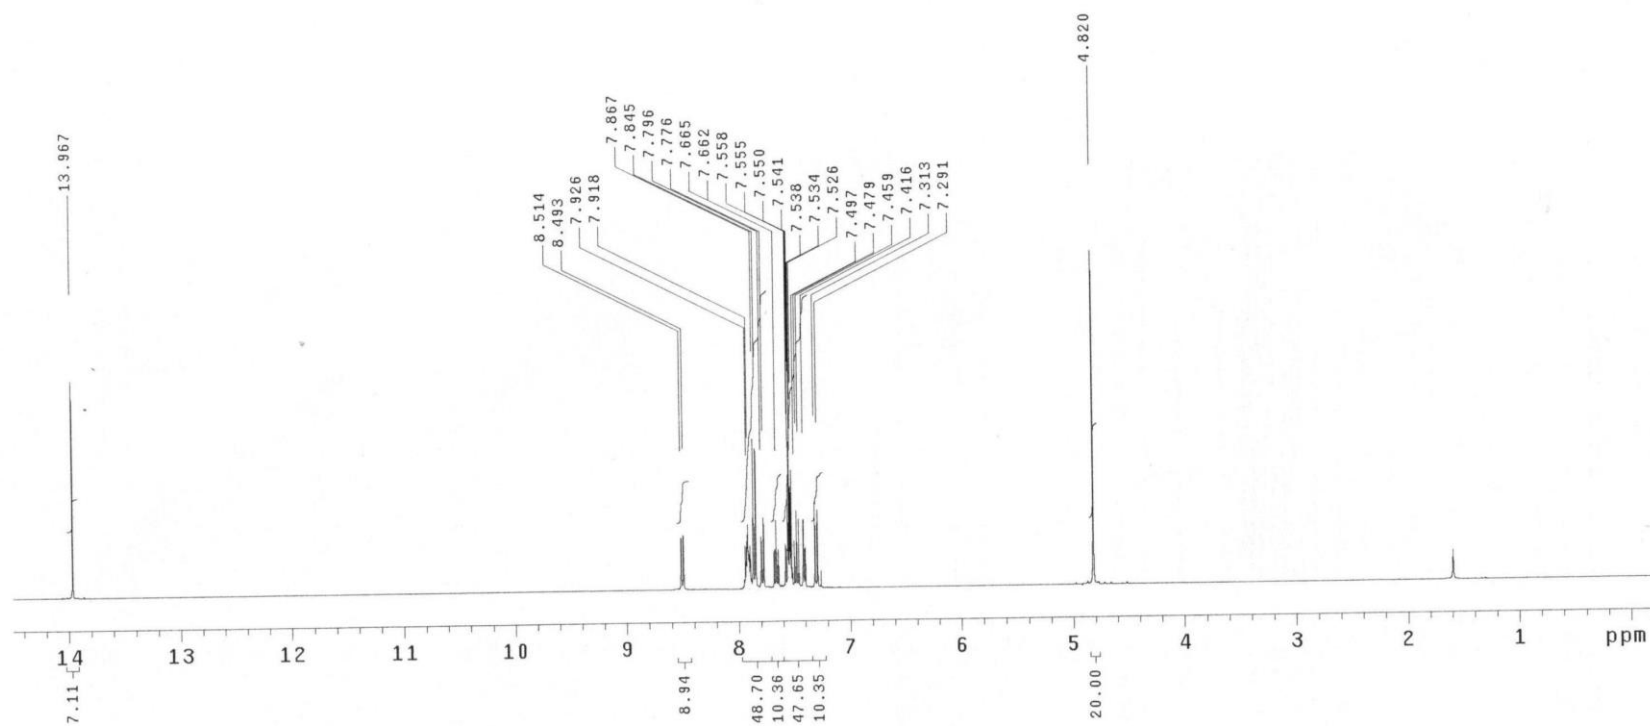

# Compound 4k (<sup>13</sup>C-NMR spectral data)

YT1NAP

Pulse Sequence: s2pu1

UNITYplus-400 "unity400"

Date: May 25 2018

Solvent: CDCl<sub>3</sub>

Ambient temperature

Total 336 repetitions

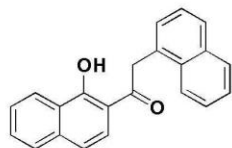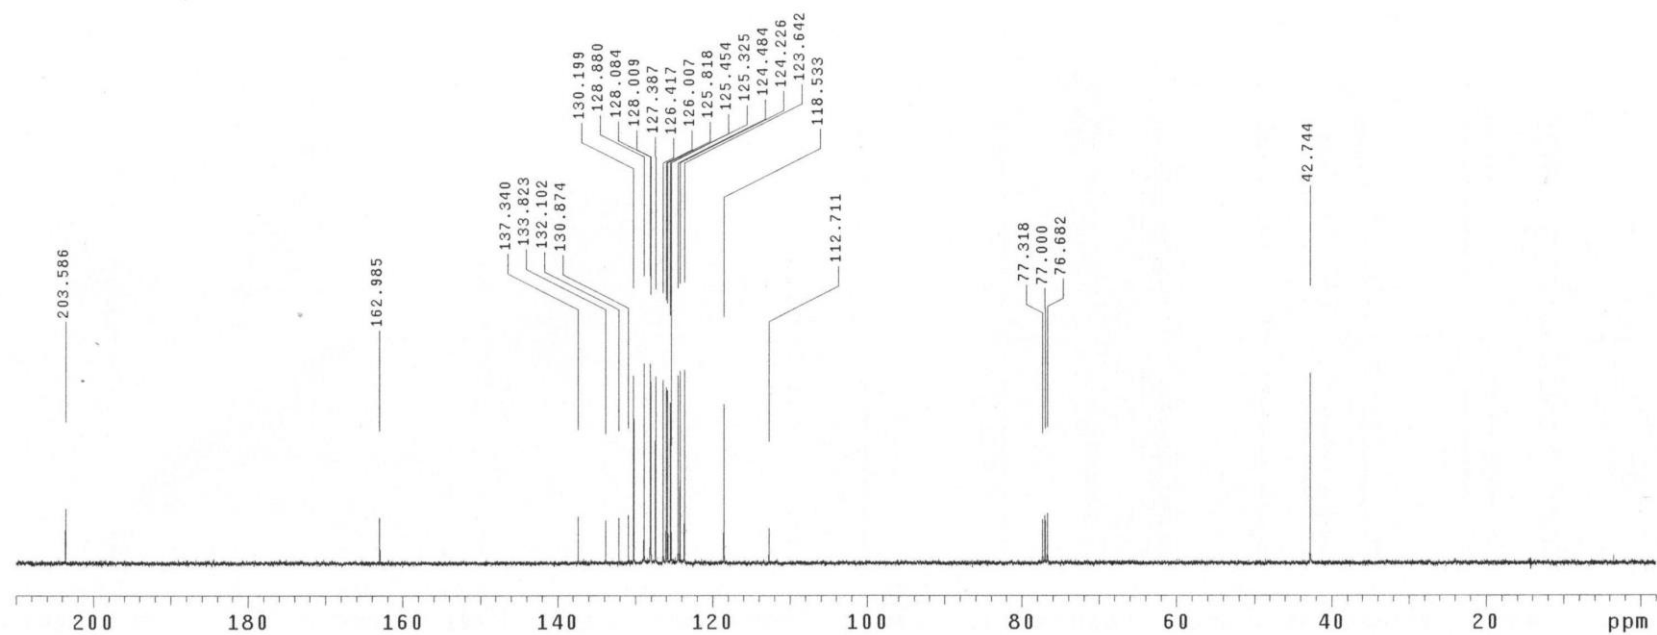

# Compound 4l (<sup>1</sup>H-NMR spectral data)

SHCF3hv

Pulse Sequence: s2pu1

UNITYplus-400 "unity400"

Date: Jul 24 2019

Solvent: CDCl<sub>3</sub>

Ambient temperature

Total 32 repetitions

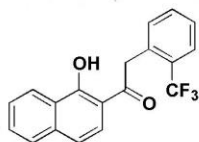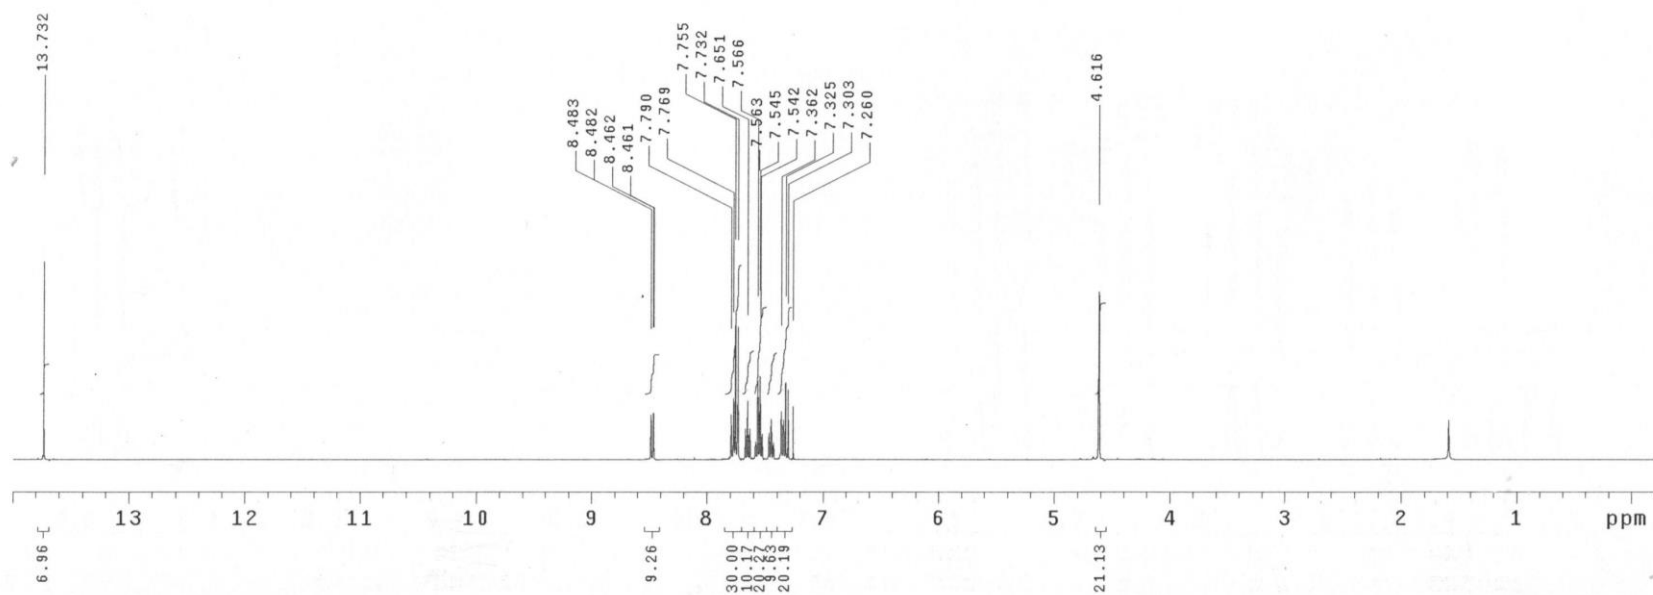



# Compound 4I ( $^{13}\text{C}$ -NMR spectral data)

SHCF3hv

Pulse Sequence: s2pu1

UNITYplus-400 "unity400"

Date: Jul 24 2019

Solvent: CDCl<sub>3</sub>

Ambient temperature

Total 2912 repetitions

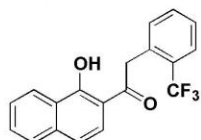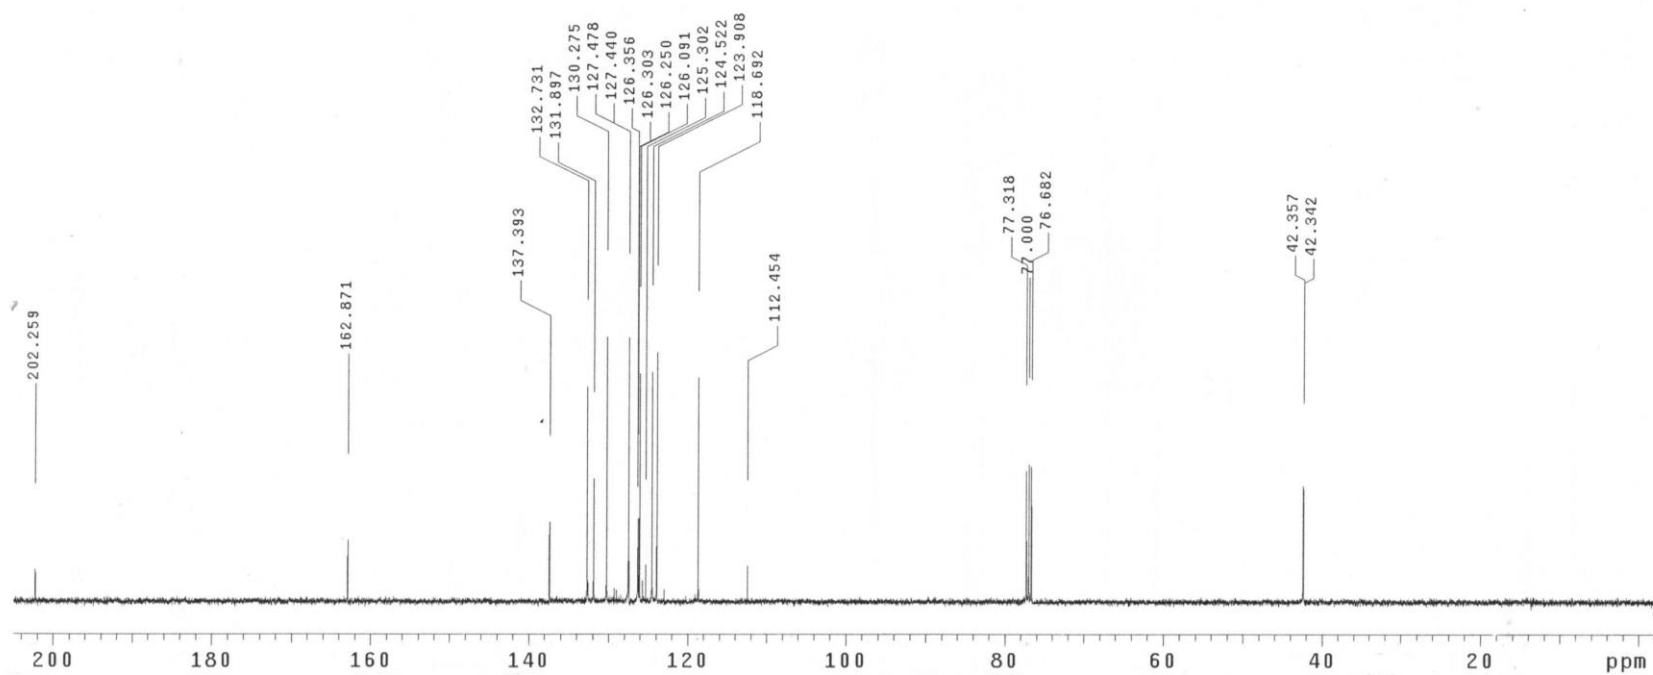

# Compound 4m (<sup>1</sup>H-NMR spectral data-1)

YTOMe2P

Pulse Sequence: s2pu1

UNITYplus-400 "unity400"

Date: Jun 6 2018

Solvent: CDCl<sub>3</sub>

Ambient temperature

Total 32 repetitions

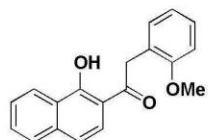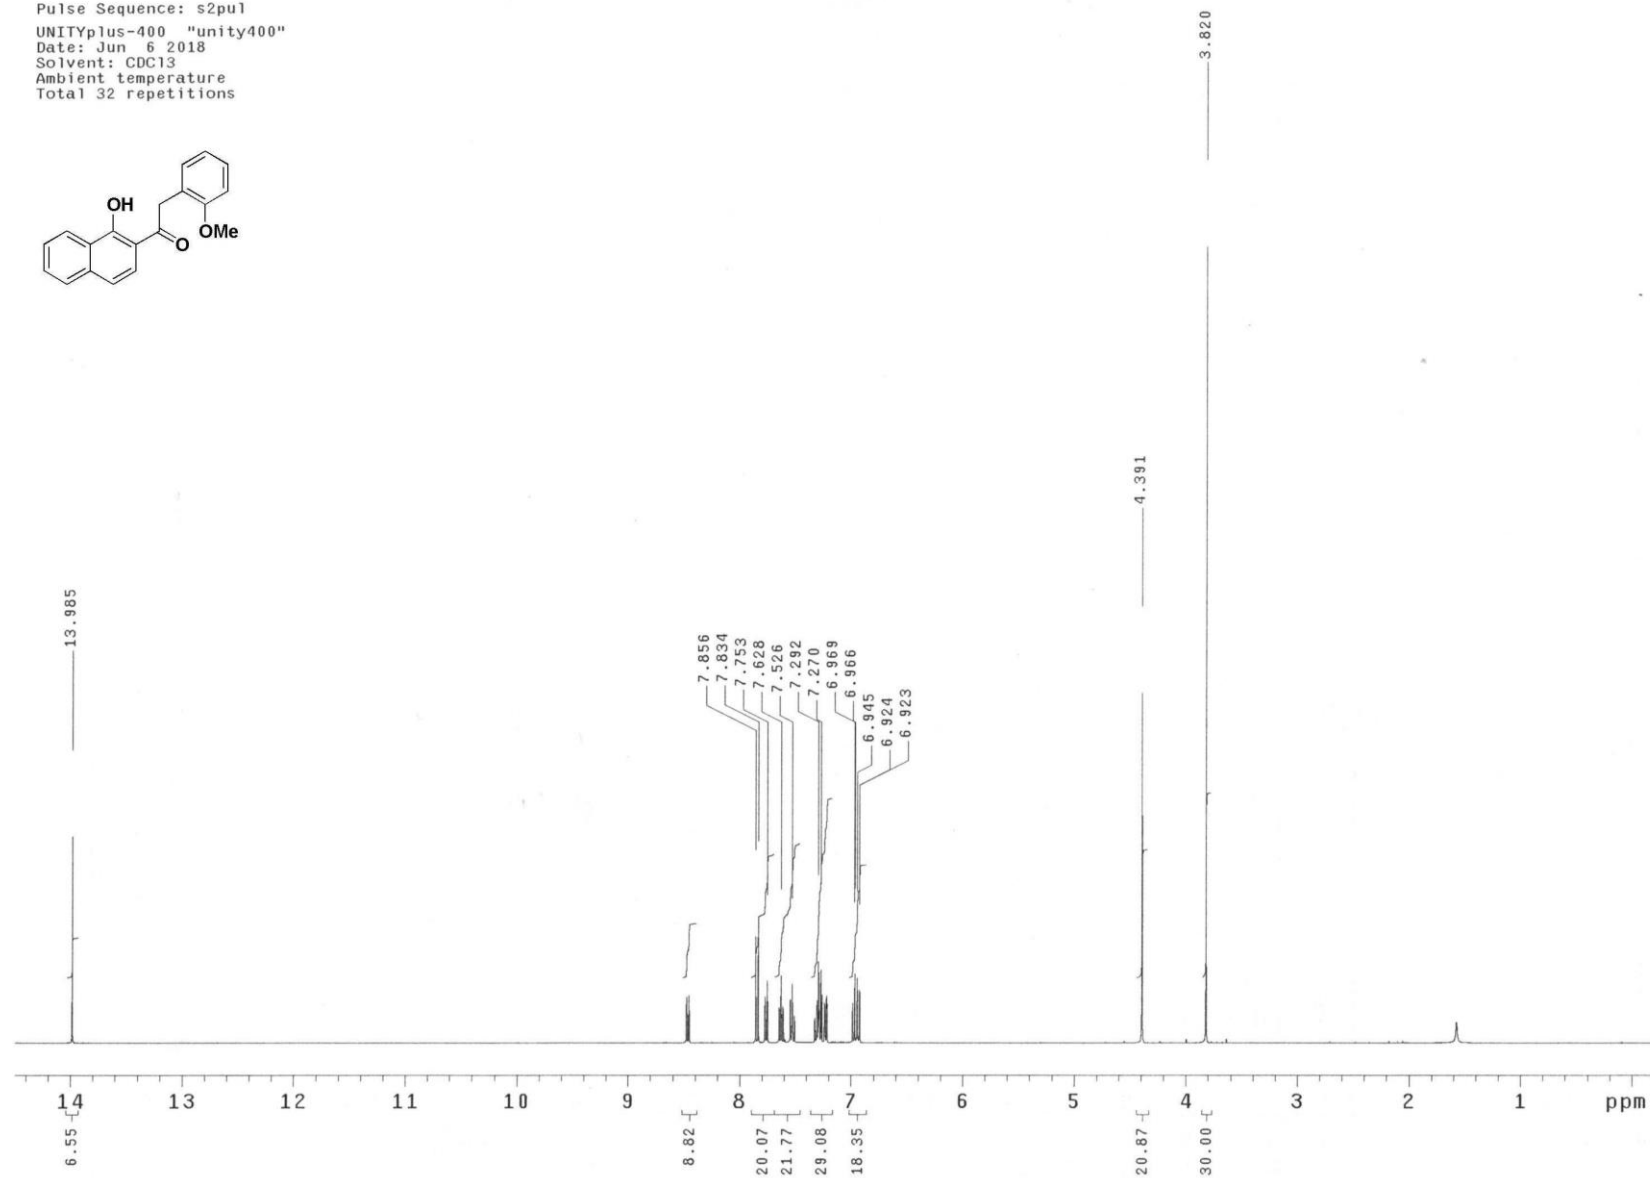

# Compound 4m (<sup>1</sup>H-NMR spectral data-2)

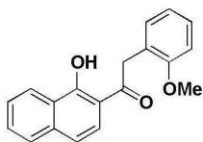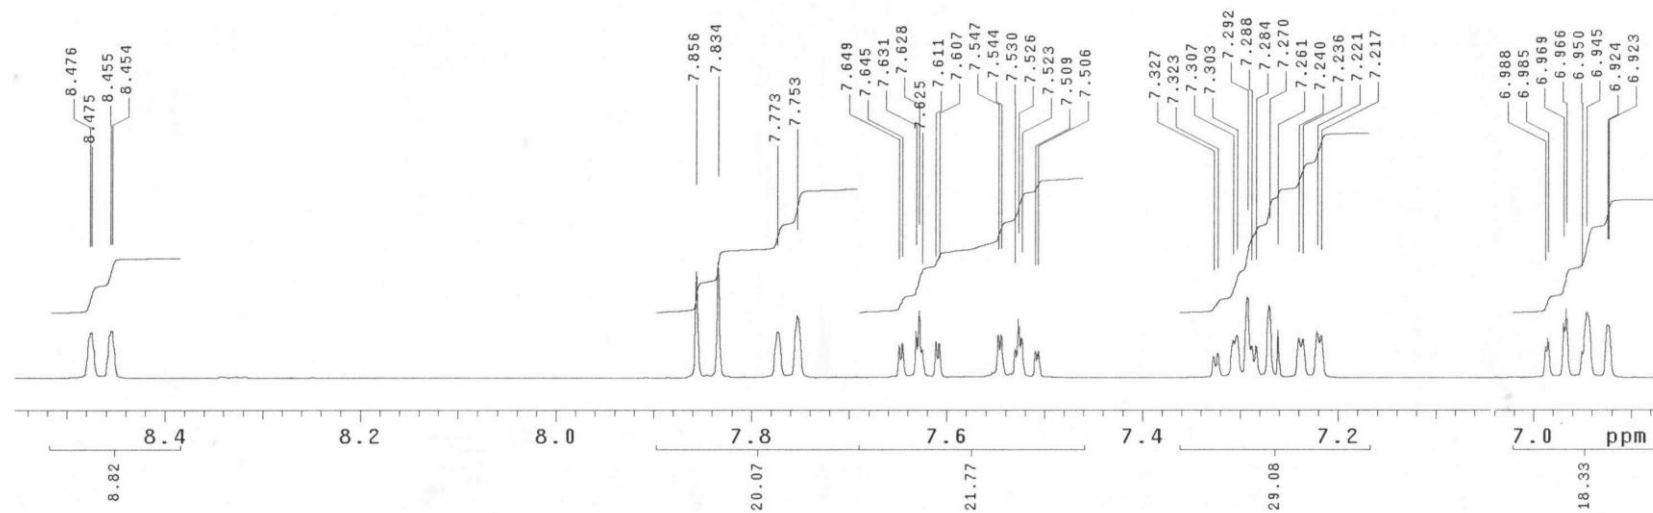

# Compound 4m (<sup>13</sup>C-NMR spectral data)

YTOMe2P

Pulse Sequence: s2pul

UNITYplus-400 "unity400"

Date: Jun 6 2018

Solvent: CDCl<sub>3</sub>

Ambient temperature

Total 1536 repetitions

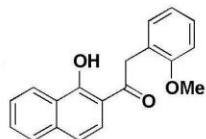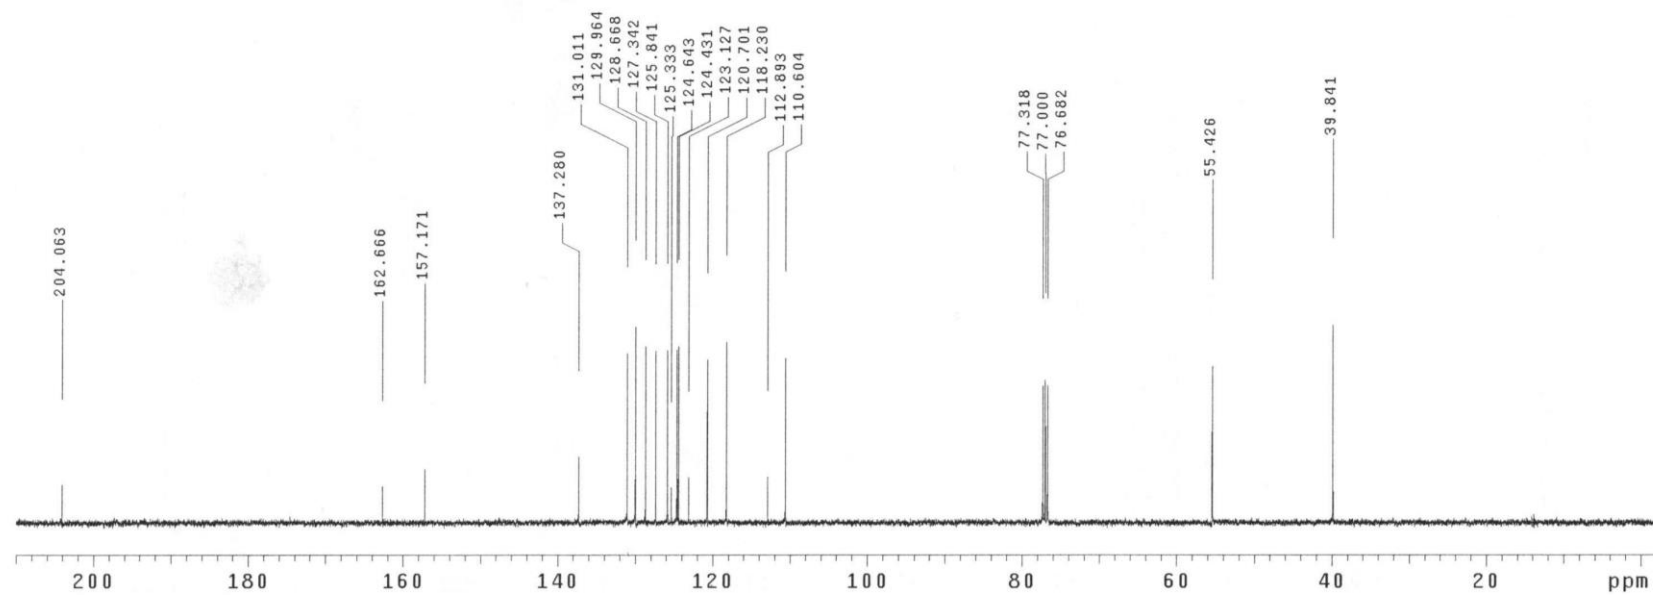

# Compound 4n (<sup>1</sup>H-NMR spectral data)

YTOMeP

Pulse Sequence: s2pu1  
 UNITYplus-400 "unity400"  
 Date: Jun 11 2018  
 Solvent: CDCl<sub>3</sub>  
 Ambient temperature  
 Total 32 repetitions

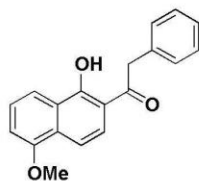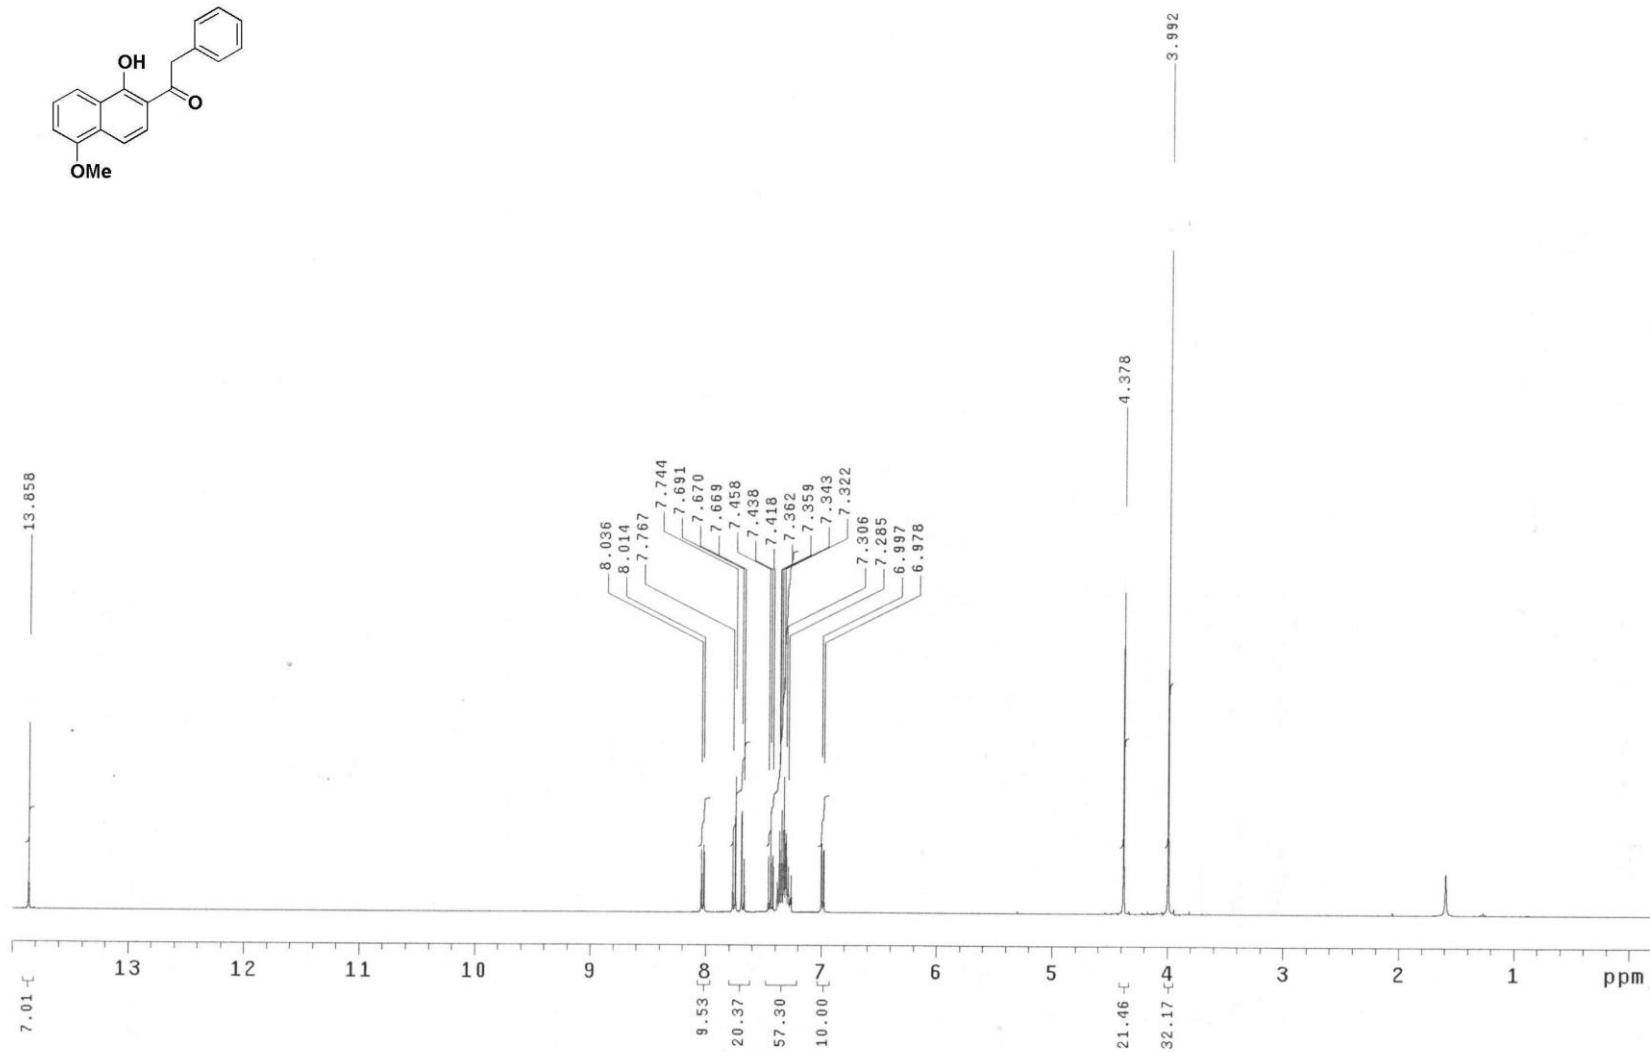

# Compound 4n (<sup>13</sup>C-NMR spectral data)

YTOMeP

Pulse Sequence: s2pu1

UNITYplus-400 "unity400"

Date: Jun 11 2018

Solvent: CDCl<sub>3</sub>

Ambient temperature

Total 672 repetitions

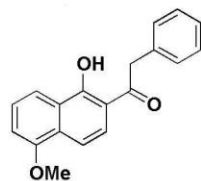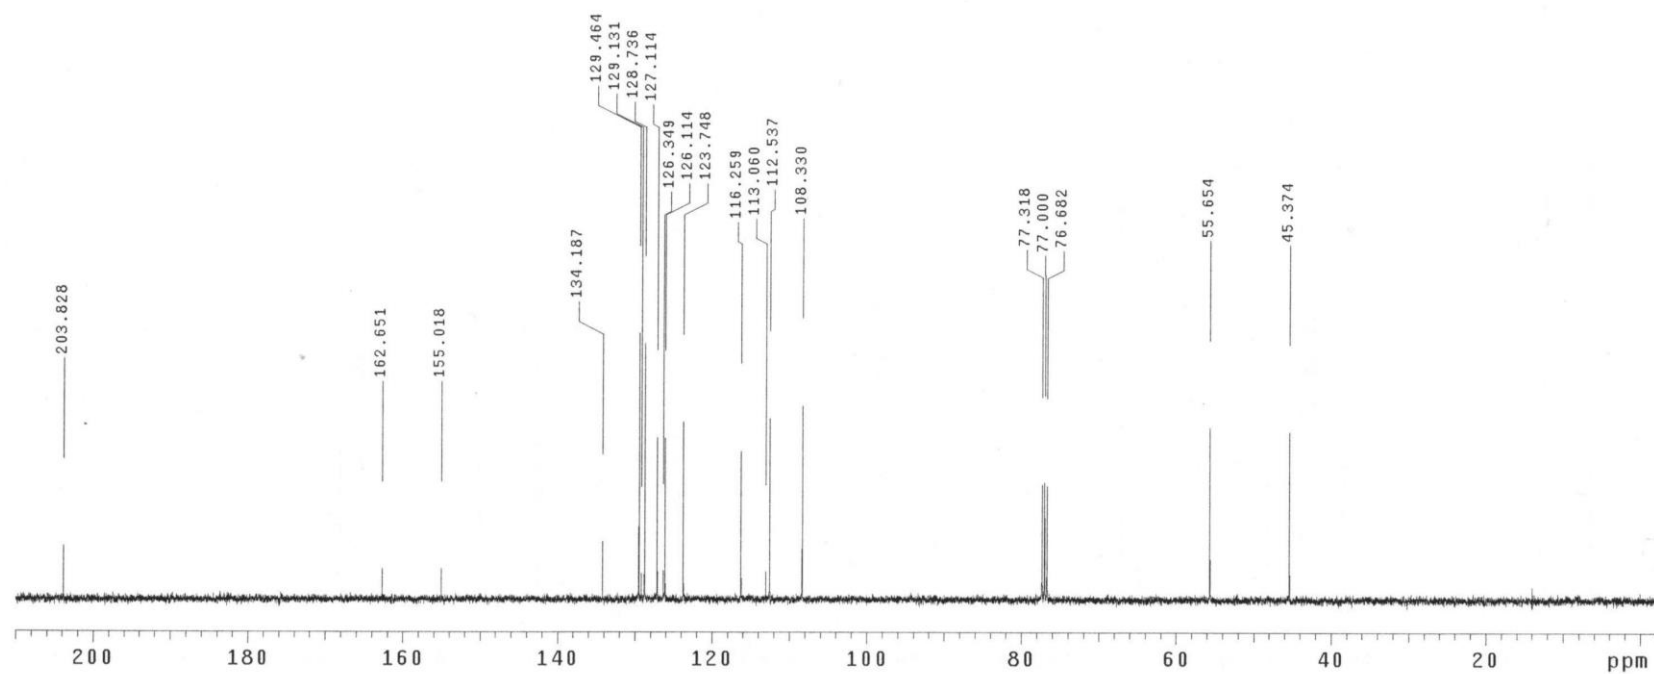

# Compound 4o (<sup>1</sup>H-NMR spectral data)

YT4-OMeP

Pulse Sequence: s2pu1  
 UNITYplus-400 "unity400"  
 Date: Aug 6 2018  
 Solvent: CDCl<sub>3</sub>  
 Ambient temperature  
 Total 32 repetitions

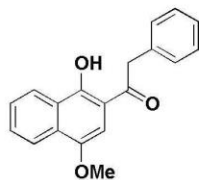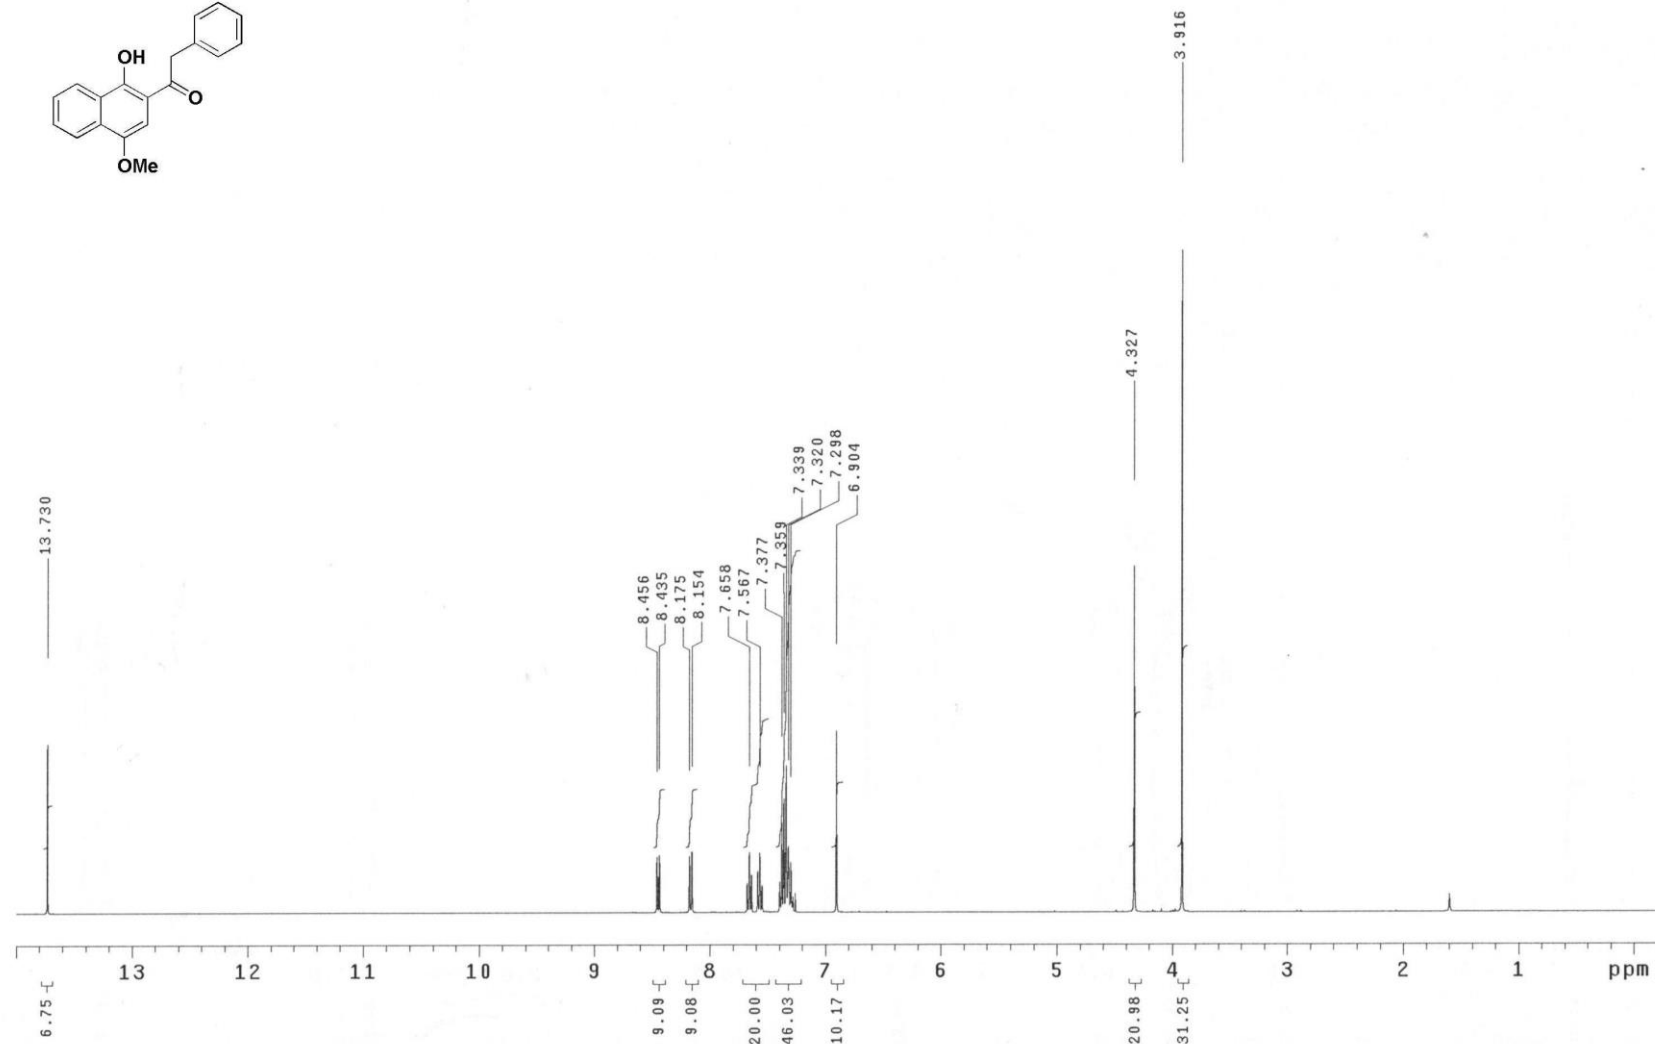

# Compound 4o (<sup>13</sup>C-NMR spectral data)

YT4-OMeP

Pulse Sequence: s2pu1

UNITYplus-400 "unity400"

Date: Aug 6 2018

Solvent: CDCl<sub>3</sub>

Ambient temperature

Total 256 repetitions

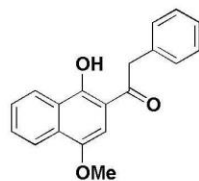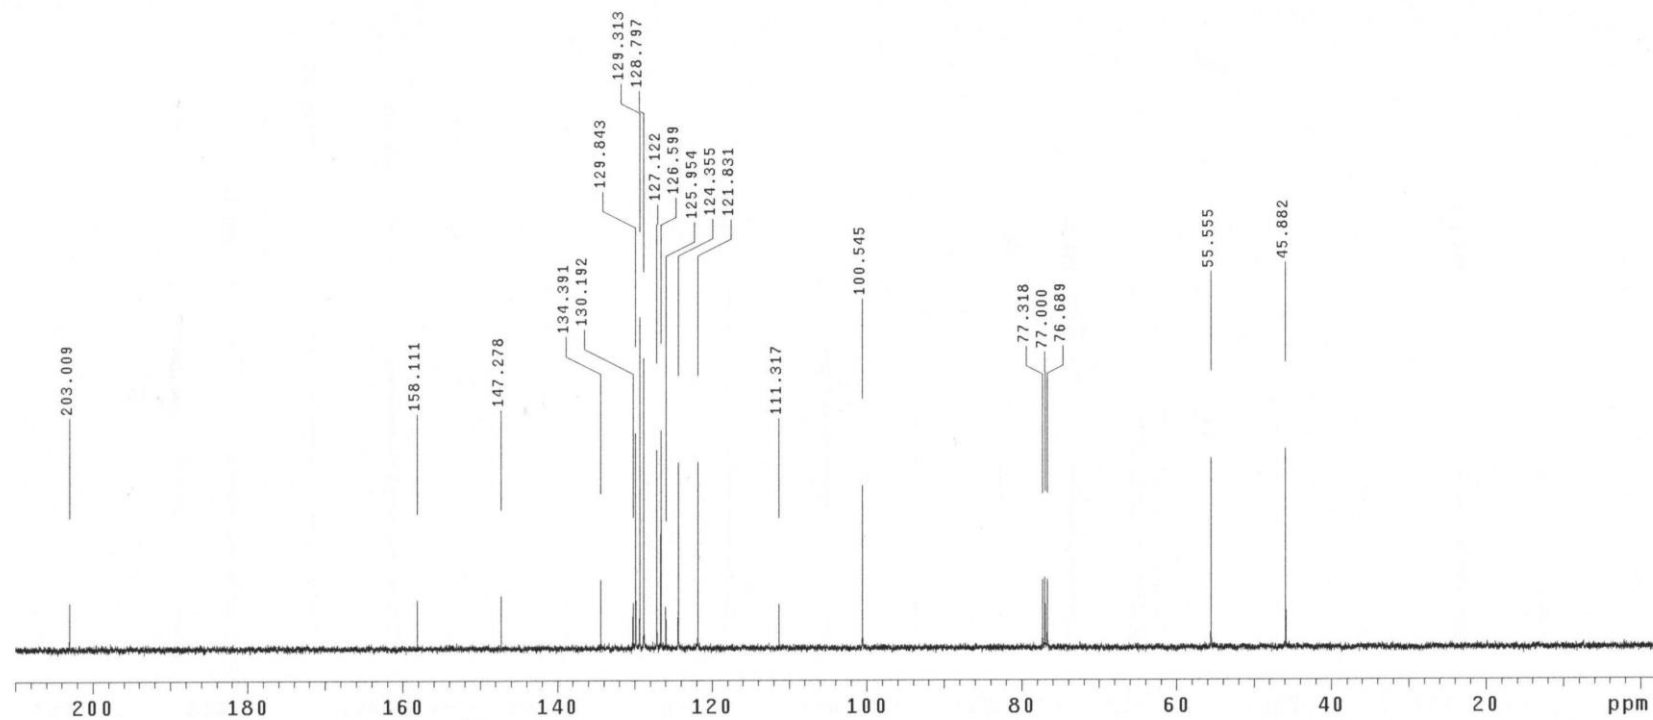



# Compound 4p (<sup>1</sup>H-NMR spectral data-1)

YT4C1Ph

Pulse Sequence: s2pu1

UNITYplus-400 "unity400"

Date: Aug 9 2018

Solvent: CDCl<sub>3</sub>

Ambient temperature

Total 32 repetitions

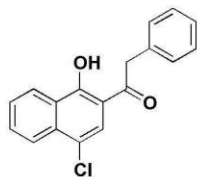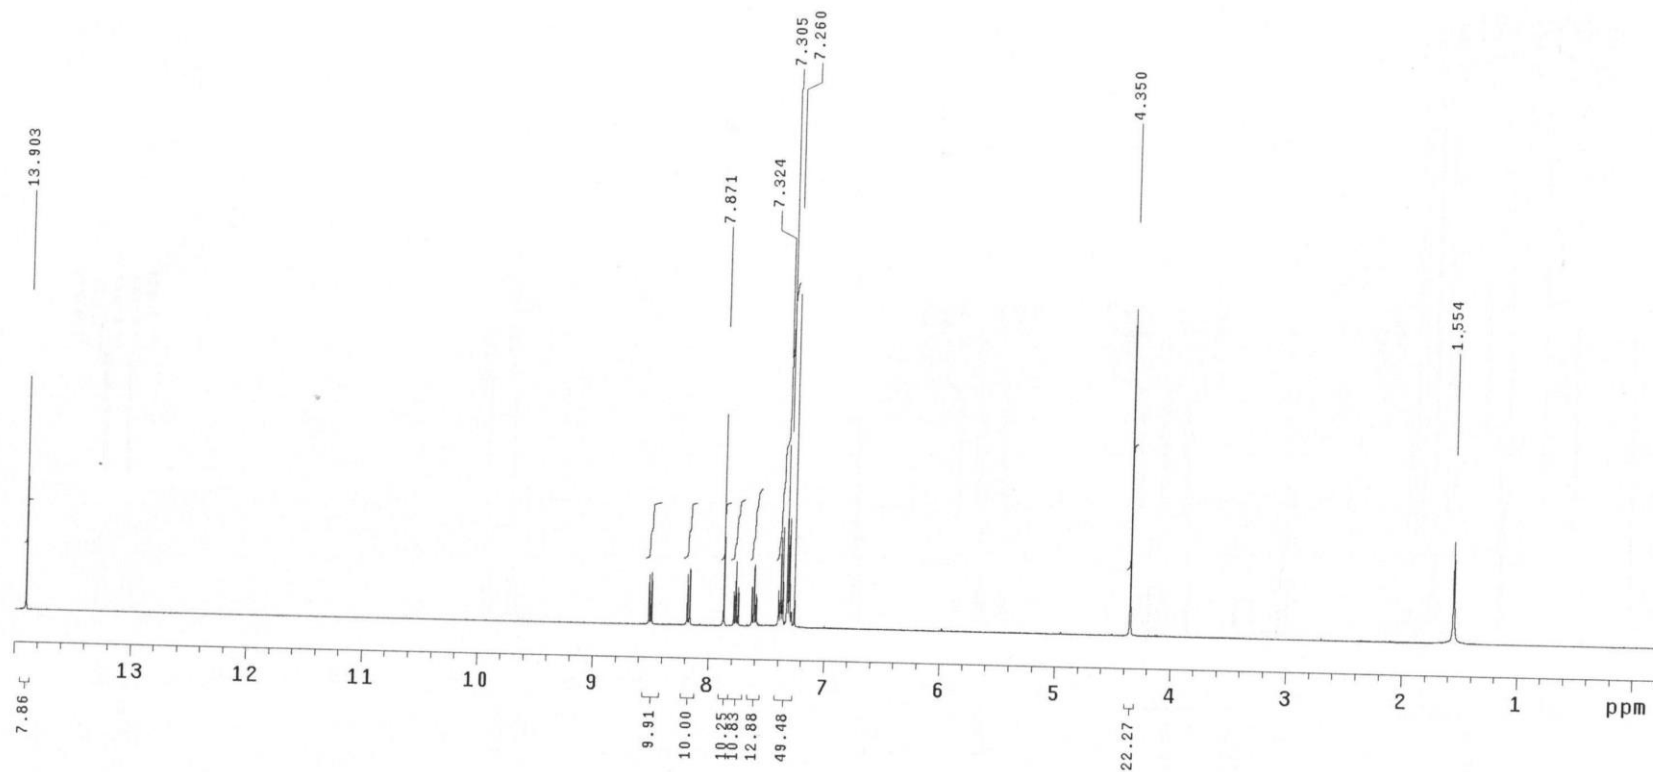

# Compound 4p (<sup>1</sup>H-NMR spectral data-2)

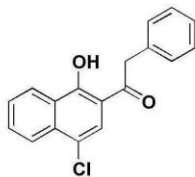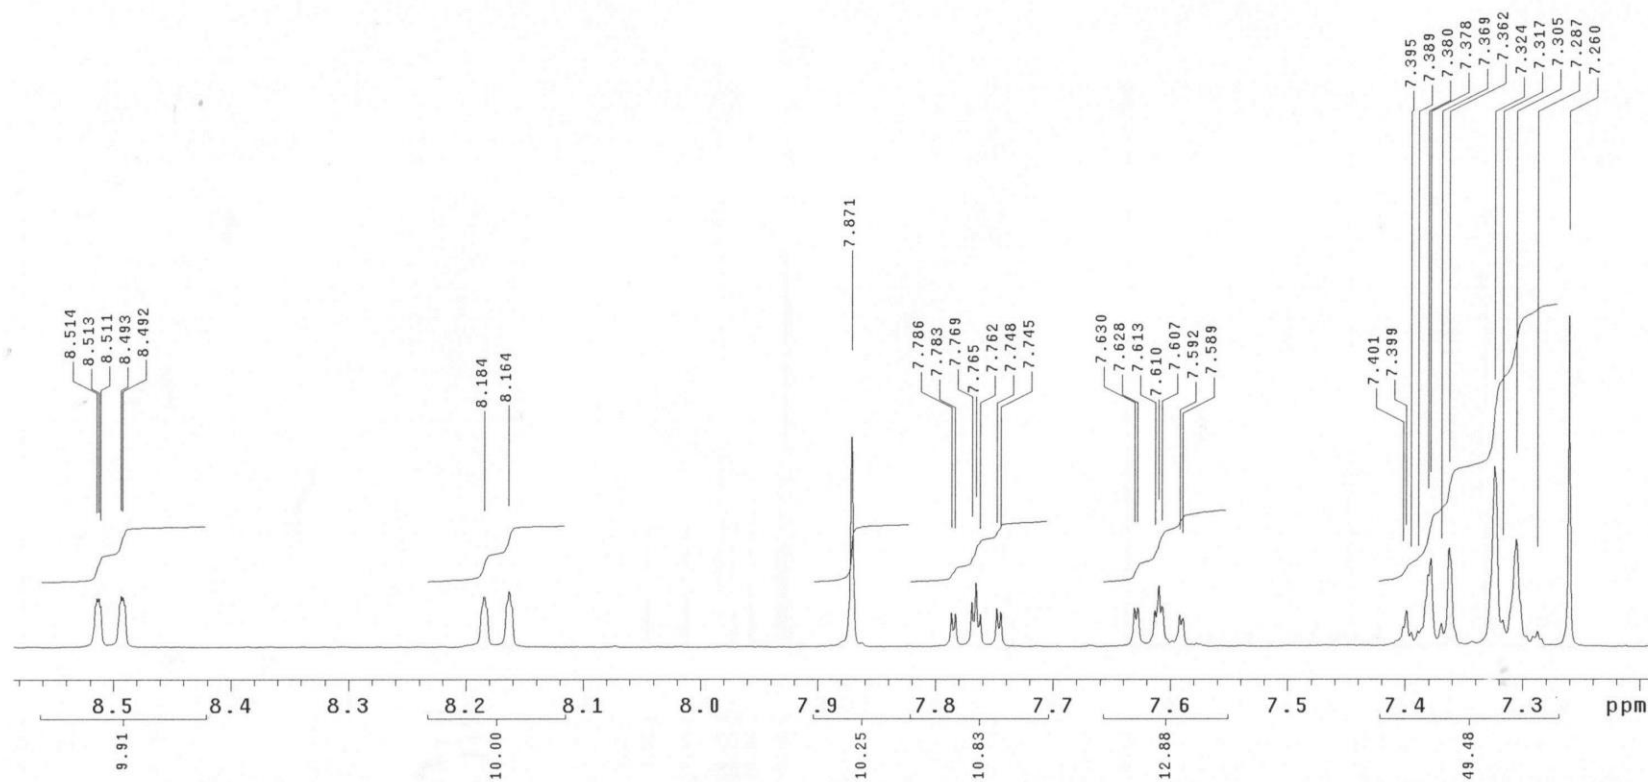

# Compound 4p (<sup>13</sup>C-NMR spectral data-1)

YT4C1Ph

Pulse Sequence: s2pu1  
 UNITYplus-400 "unity400"  
 Date: Aug 9 2018  
 Solvent: CDCl<sub>3</sub>  
 Ambient temperature  
 Total 5104 repetitions

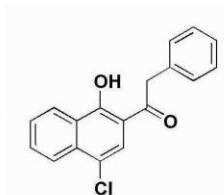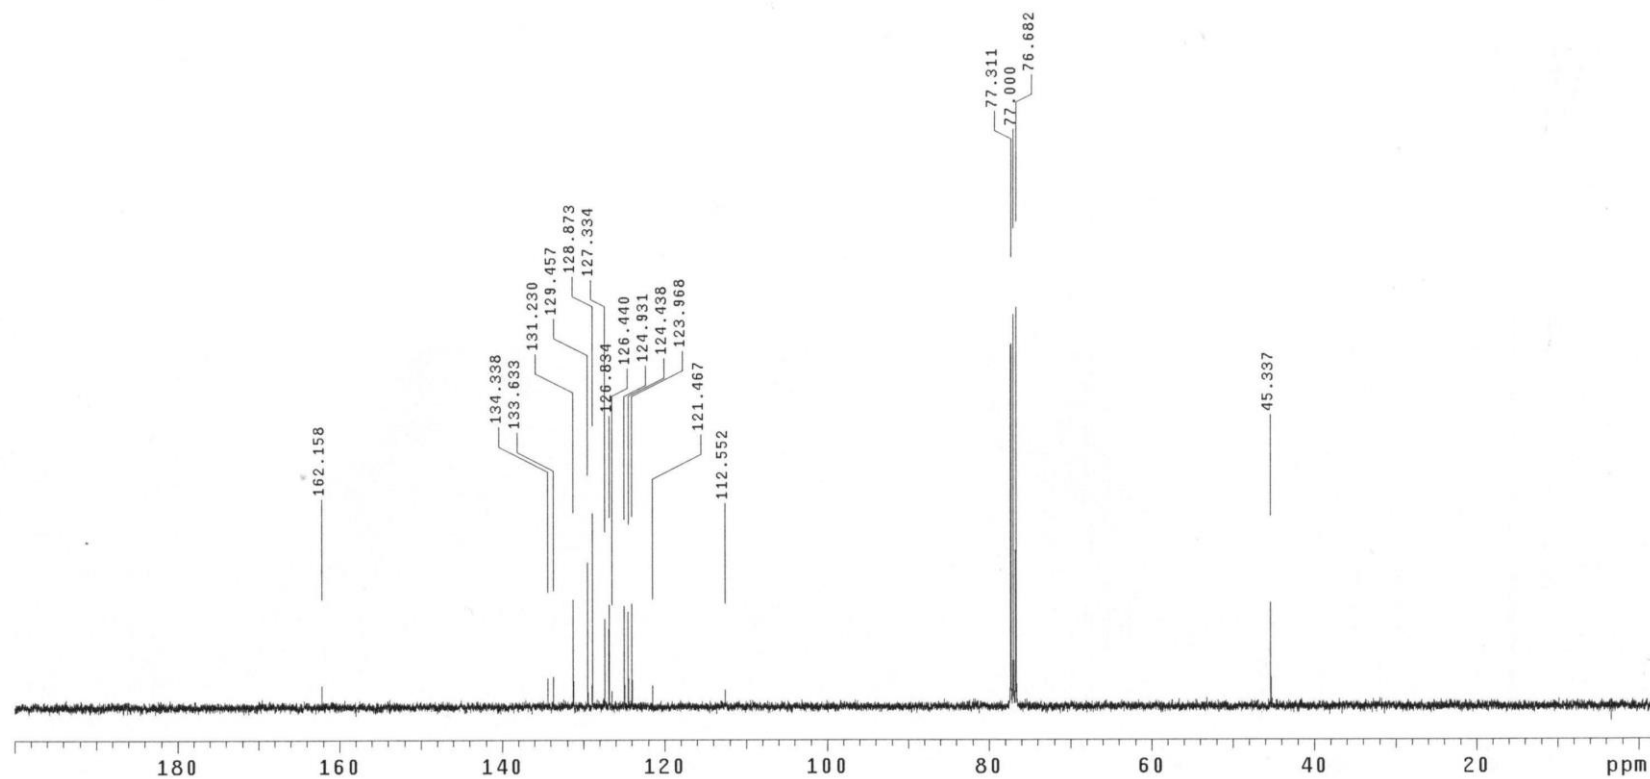

# Compound 4p ( $^{13}\text{C}$ -NMR spectral data-2)

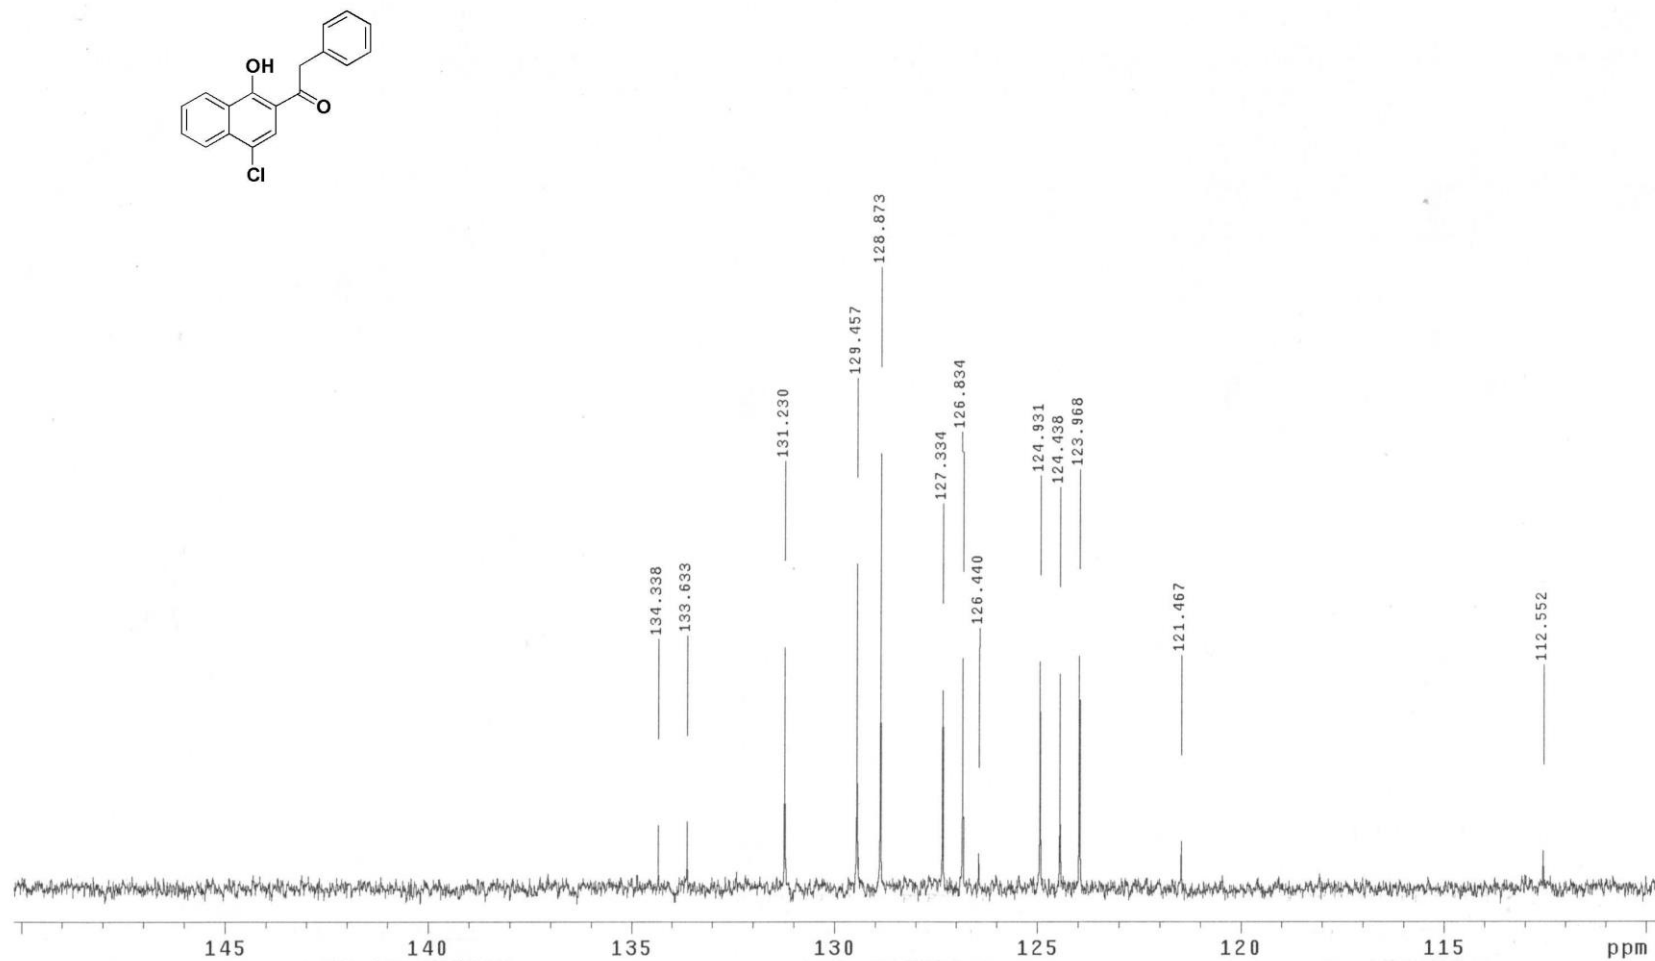

# Compound 4q (<sup>1</sup>H-NMR spectral data)

YT2Xup

Pulse Sequence: s2pu1

UNITYplus-400 "unity400"

Date: Jun 6 2018

Solvent: CDCl<sub>3</sub>

Ambient temperature

Total 32 Repetitions

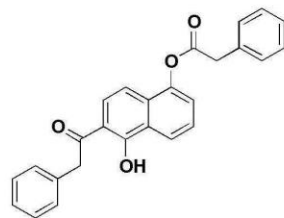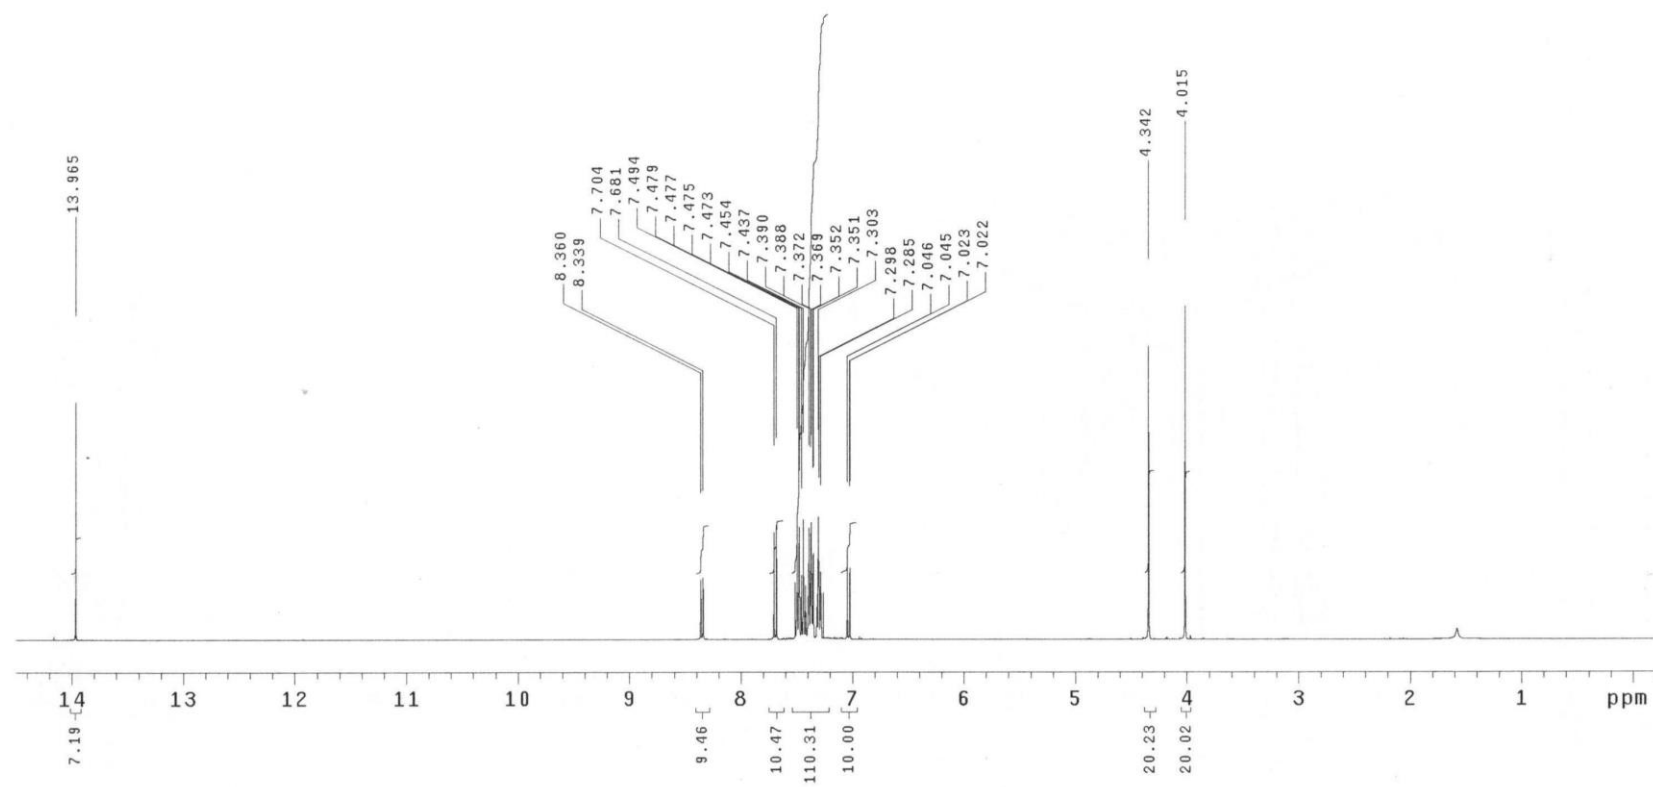

# Compound 4q (<sup>13</sup>C-NMR spectral data)

YT2Xup

Pulse Sequence: s2pu1

UNITYplus-400 "unity400"

Date: Jun 6 2018

Solvent: CDCl<sub>3</sub>

Ambient temperature

Total 544 repetitions

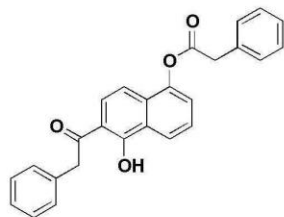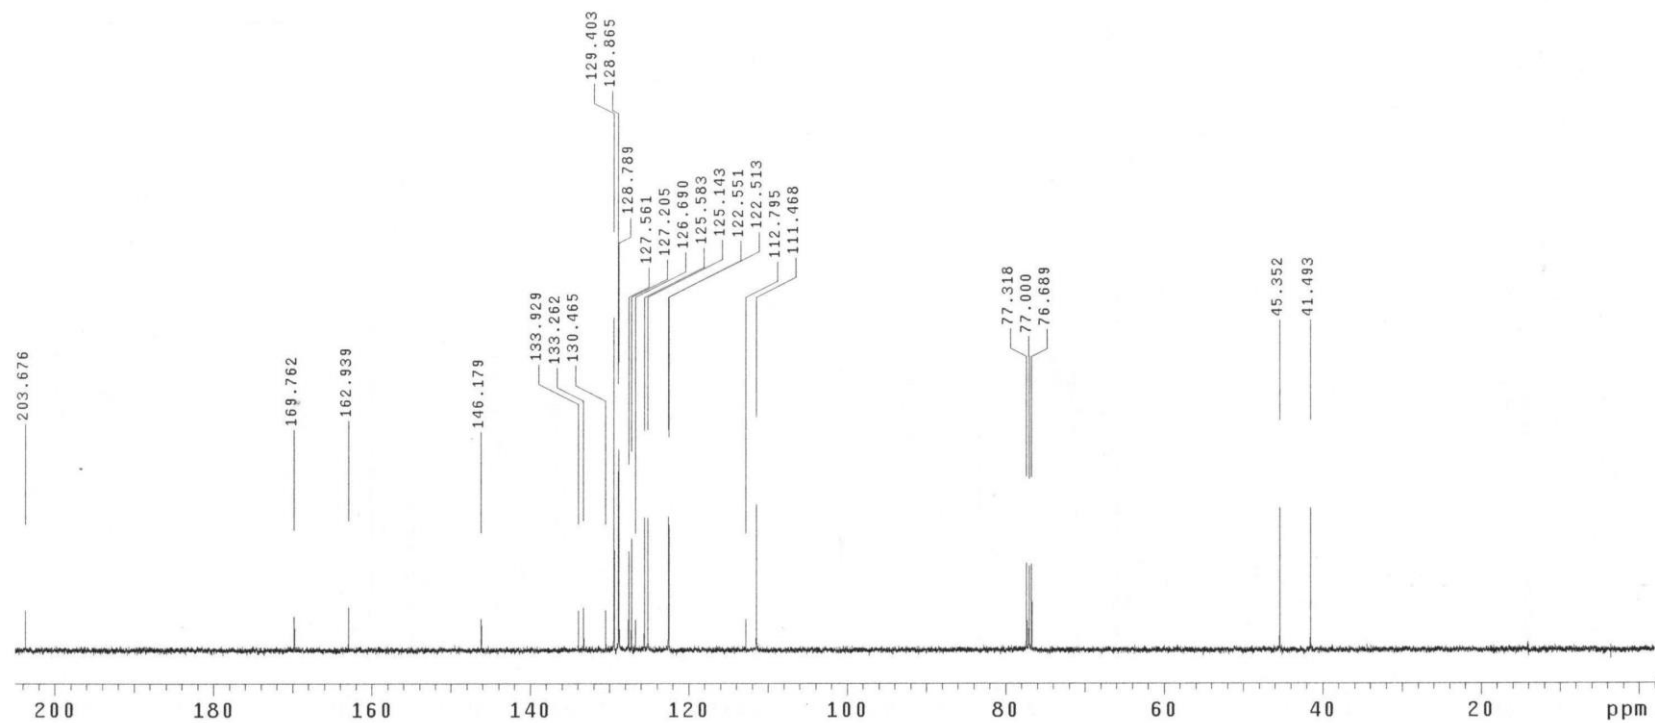

# Compound 5a (<sup>1</sup>H-NMR spectral data-1)

YT4749

Pulse Sequence: s2pu1  
 UNITYplus-400 "unity400"  
 Date: Mar 5 2018  
 Solvent: CDCl<sub>3</sub>  
 Ambient temperature  
 Total 56 repetitions

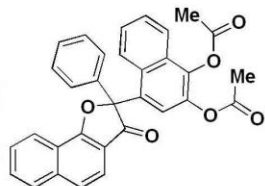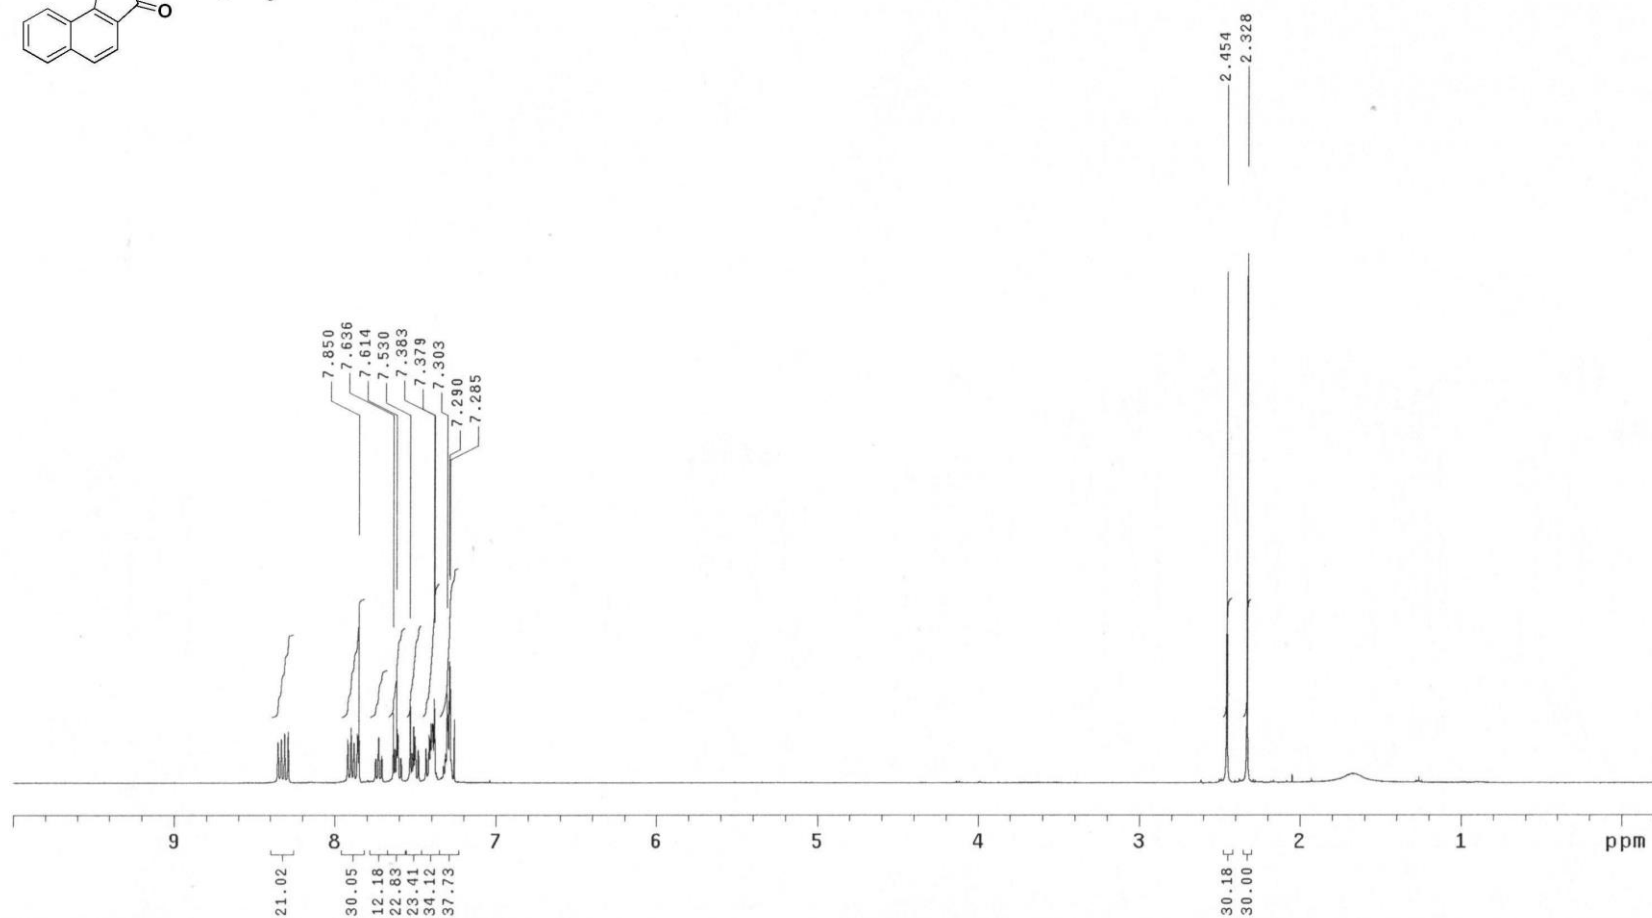

# Compound 5a (<sup>1</sup>H-NMR spectral data-2)

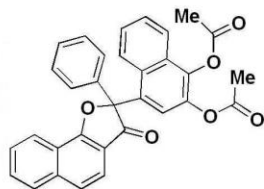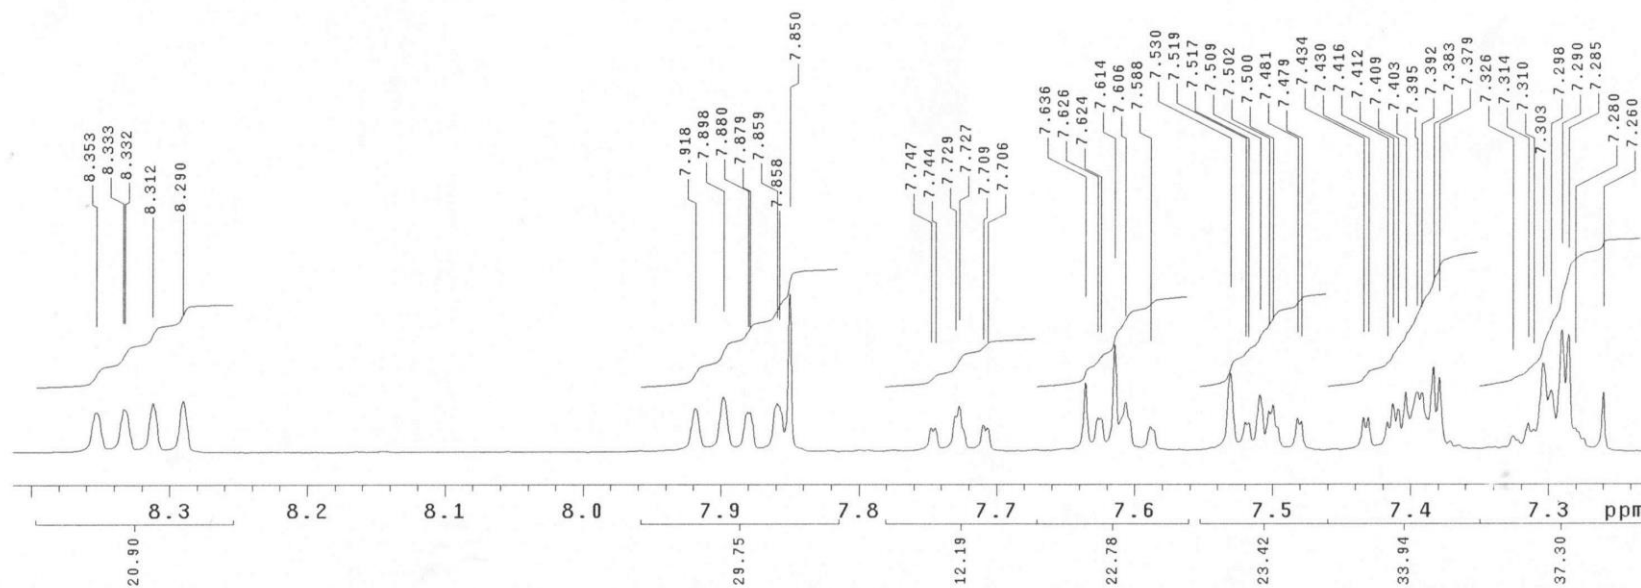



# Compound 5a (<sup>13</sup>C-NMR spectral data)

YT4749

Pulse Sequence: s2pu1  
UNITYplus-400 "unity400"  
Date: Mar 5 2018  
Solvent: CDCl<sub>3</sub>  
Ambient temperature  
Total 3360 repetitions

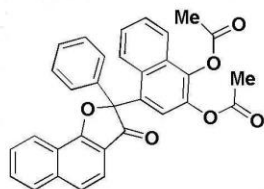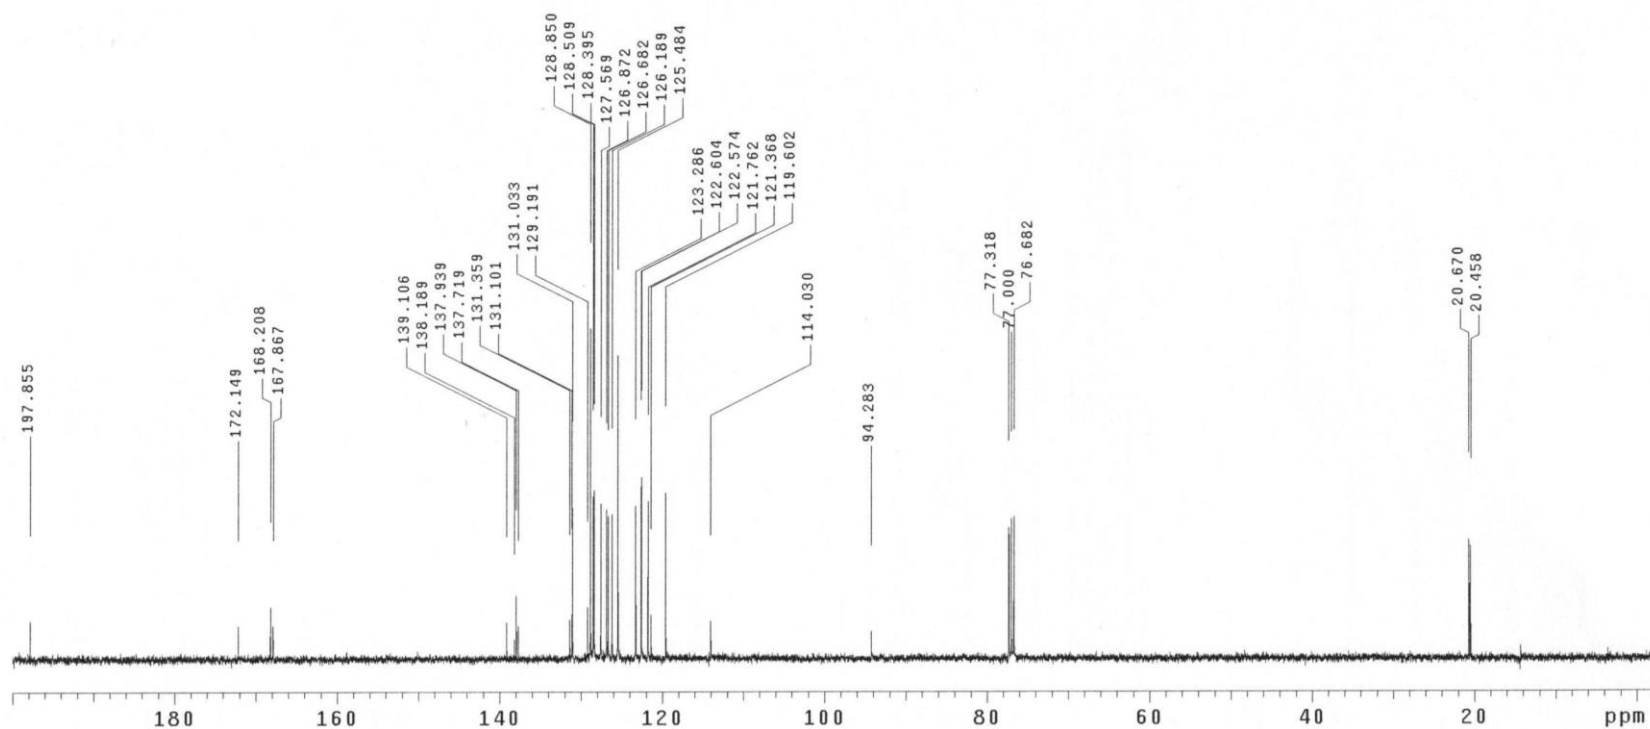

# Compound 5b (<sup>1</sup>H-NMR spectral data-1)

YT2Me0

Pulse Sequence: s2pu1

UNITYplus-400 "unity400"

Date: May 10 2018

Solvent: CDCl<sub>3</sub>

Ambient temperature

Total 80 repetitions

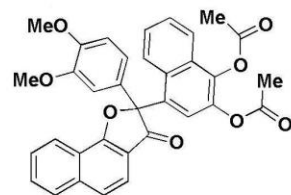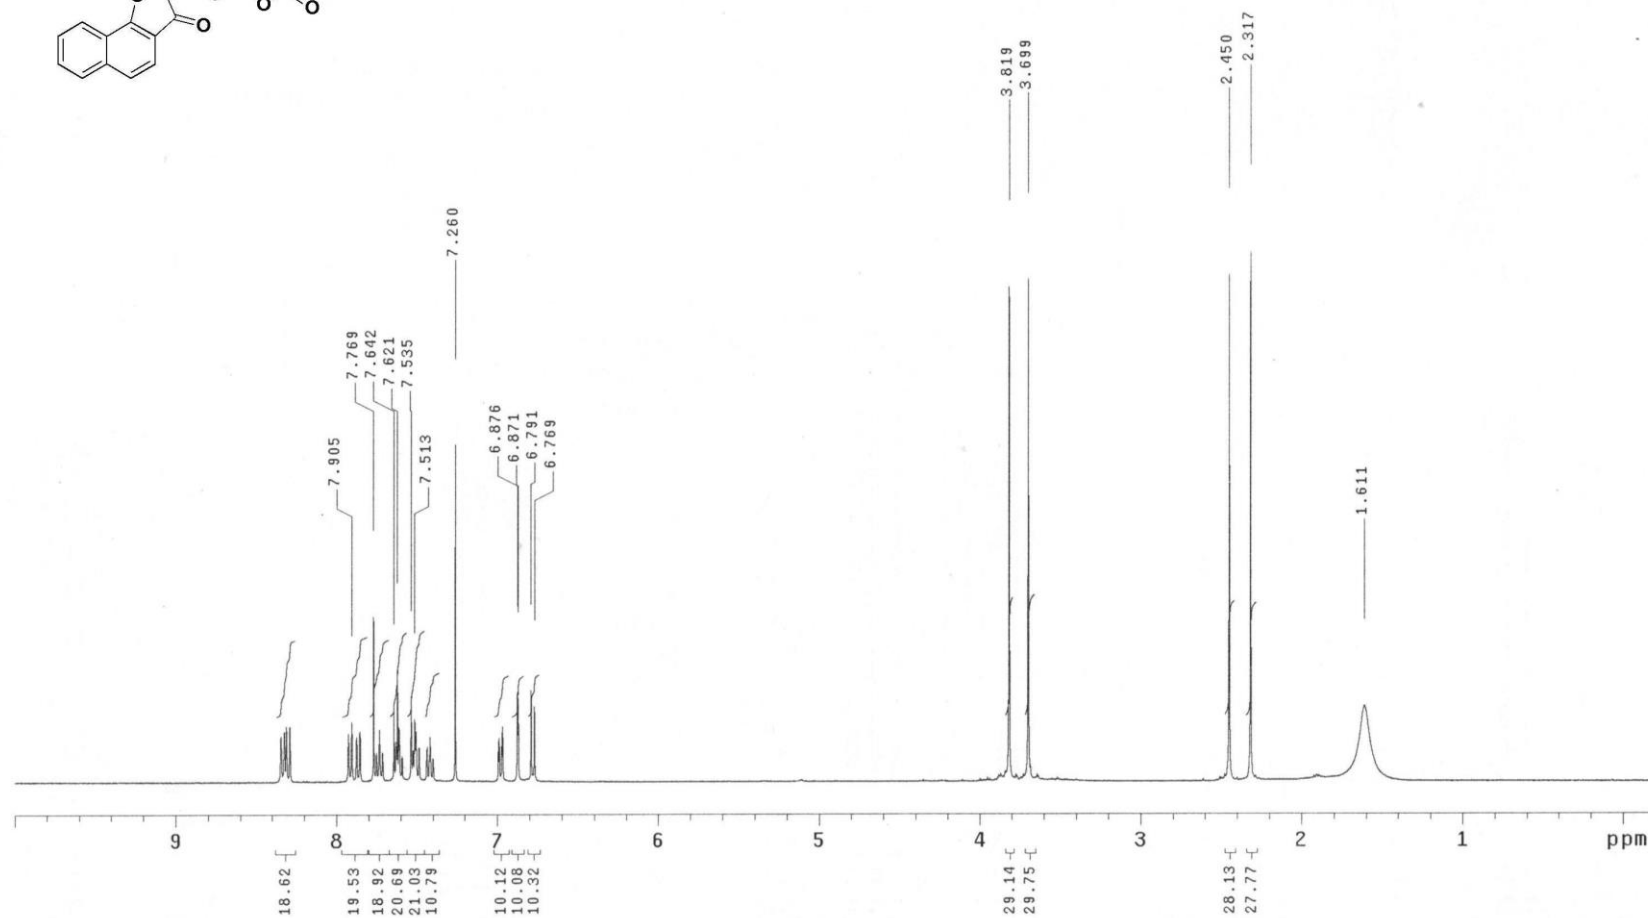

# Compound 5b (<sup>1</sup>H-NMR spectral data-2)

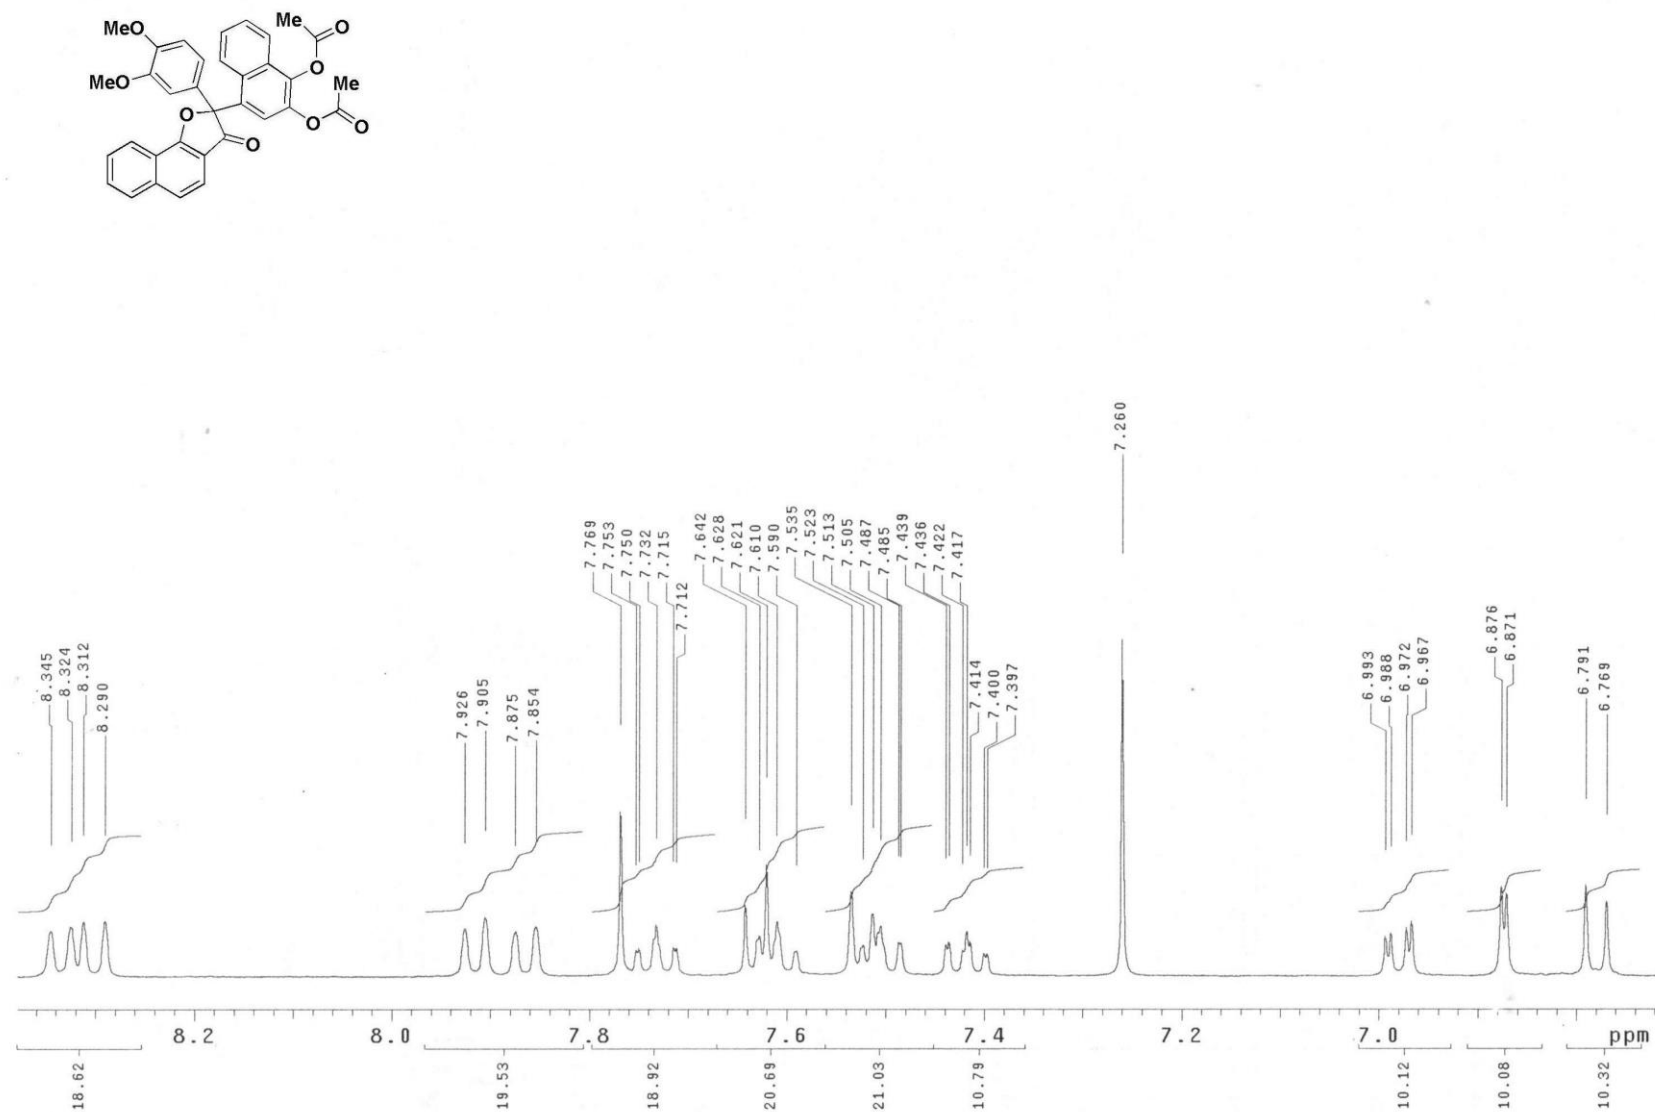

# Compound 5b (<sup>13</sup>C-NMR spectral data-1)

YT2MeO

Pulse Sequence: s2pu1

UNITYplus-400 "unity400"

Date: May 10 2018

Solvent: CDCl<sub>3</sub>

Ambient temperature

Total 20480 repetitions

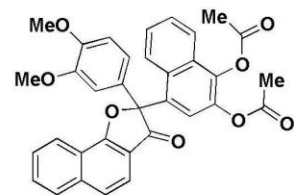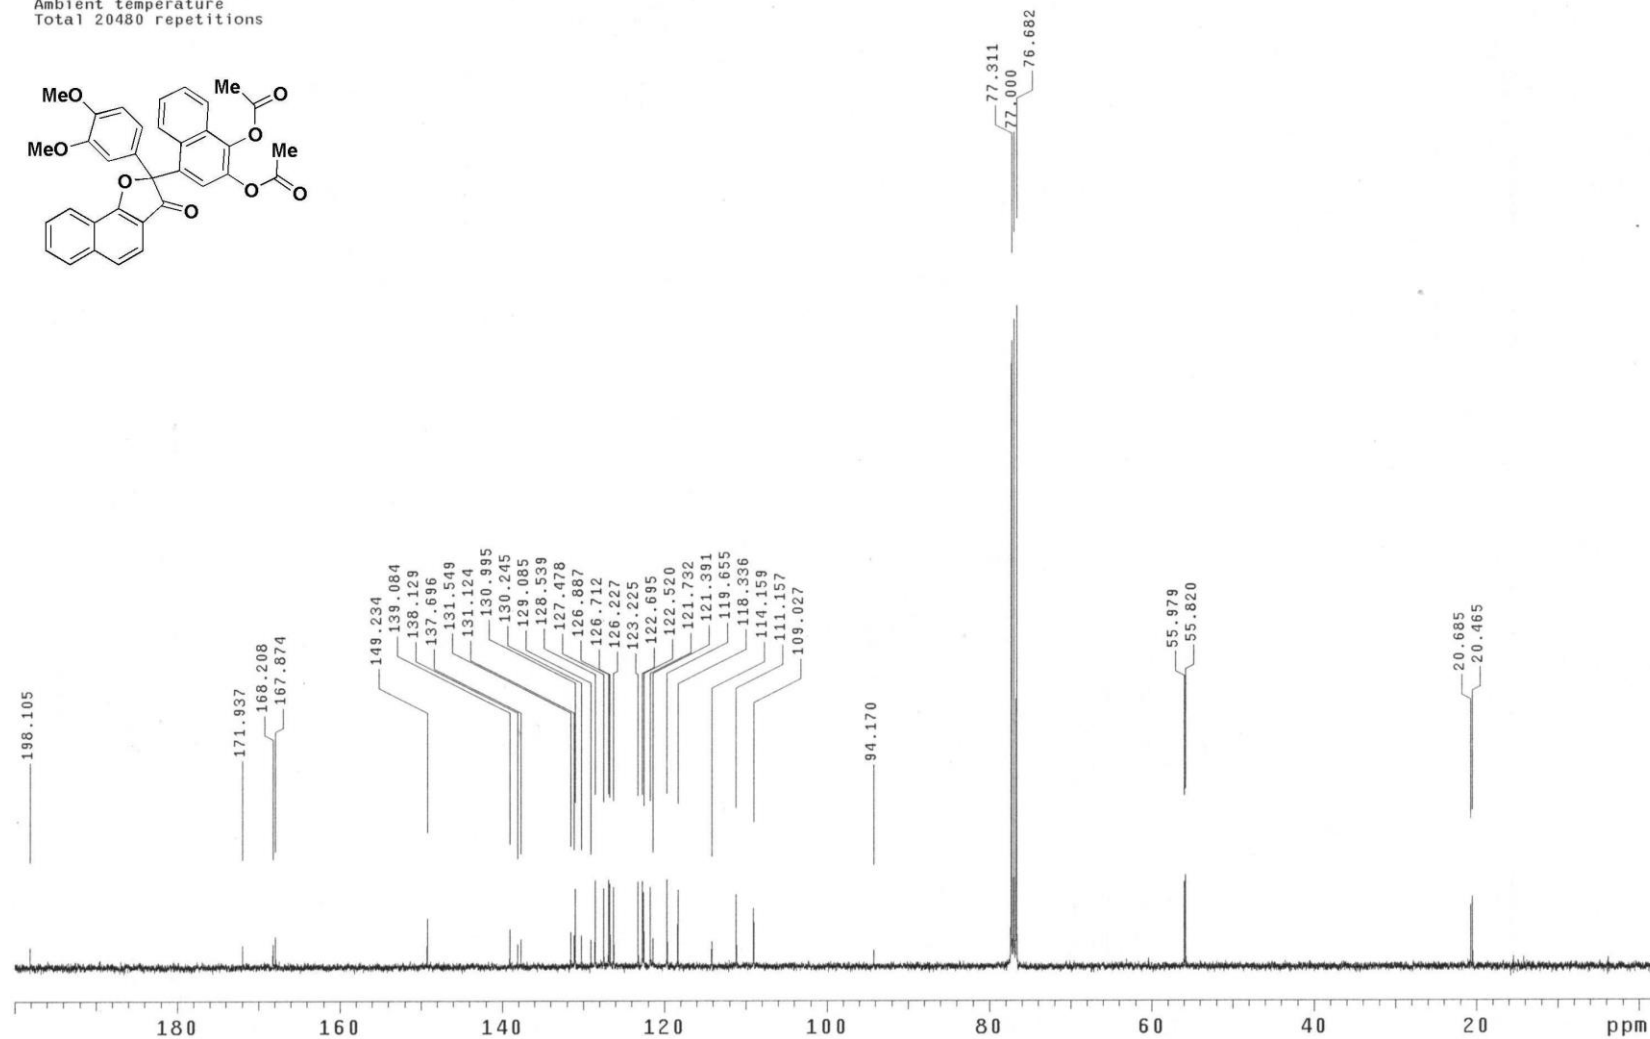

# Compound 5b ( $^{13}\text{C}$ -NMR spectral data-2)

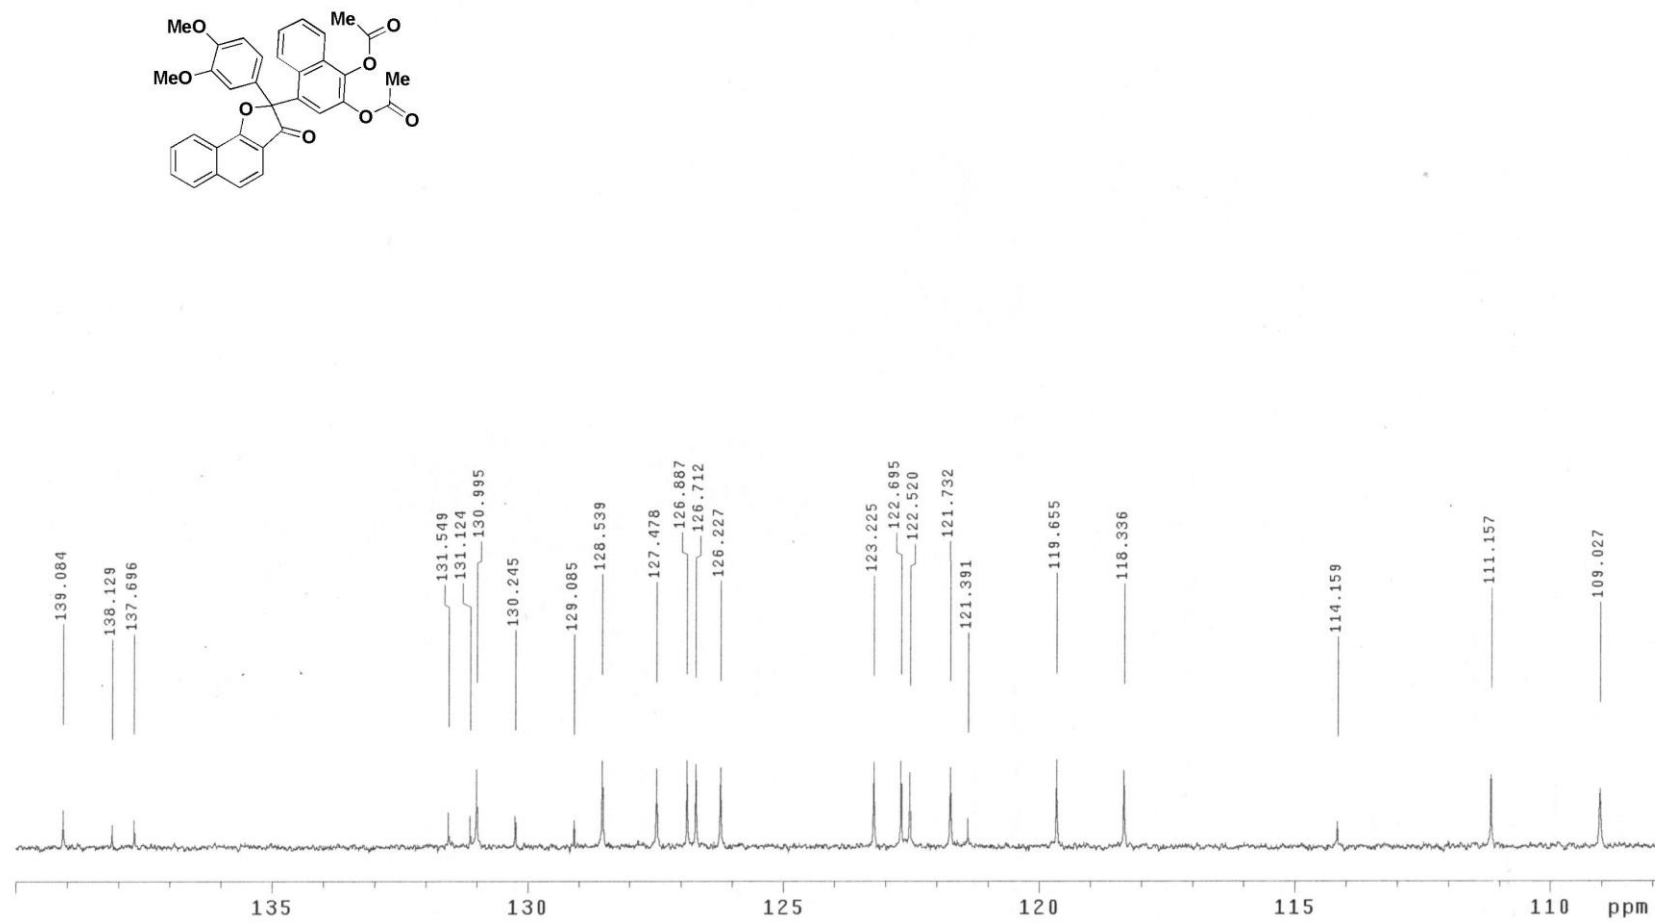

# Compound 5c (<sup>1</sup>H-NMR spectral data-1)

YTF4749

Pulse Sequence: s2pu1

UNITYplus-400 "unity400"

Date: Mar 27 2018

Solvent: CDCl<sub>3</sub>

Ambient temperature

Total 32 repetitions

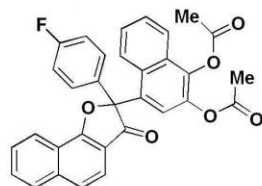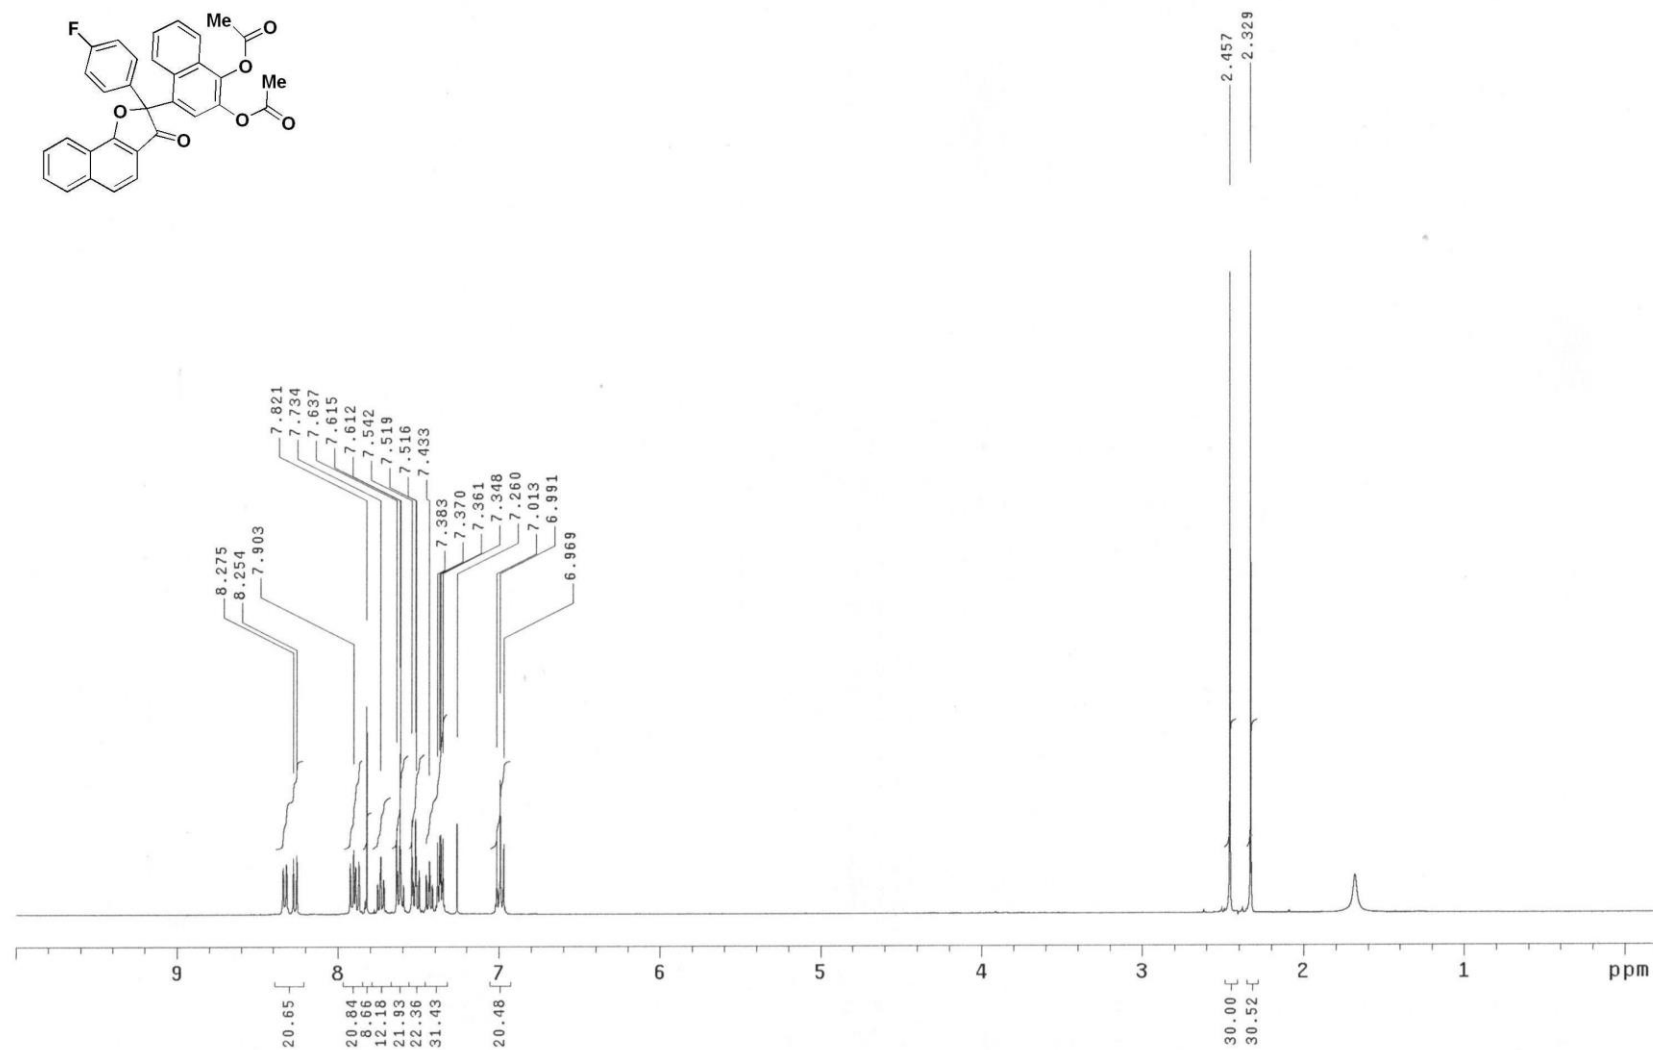

# Compound 5c (<sup>1</sup>H-NMR spectral data-2)

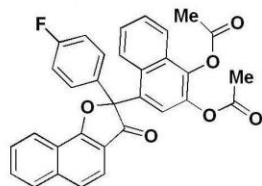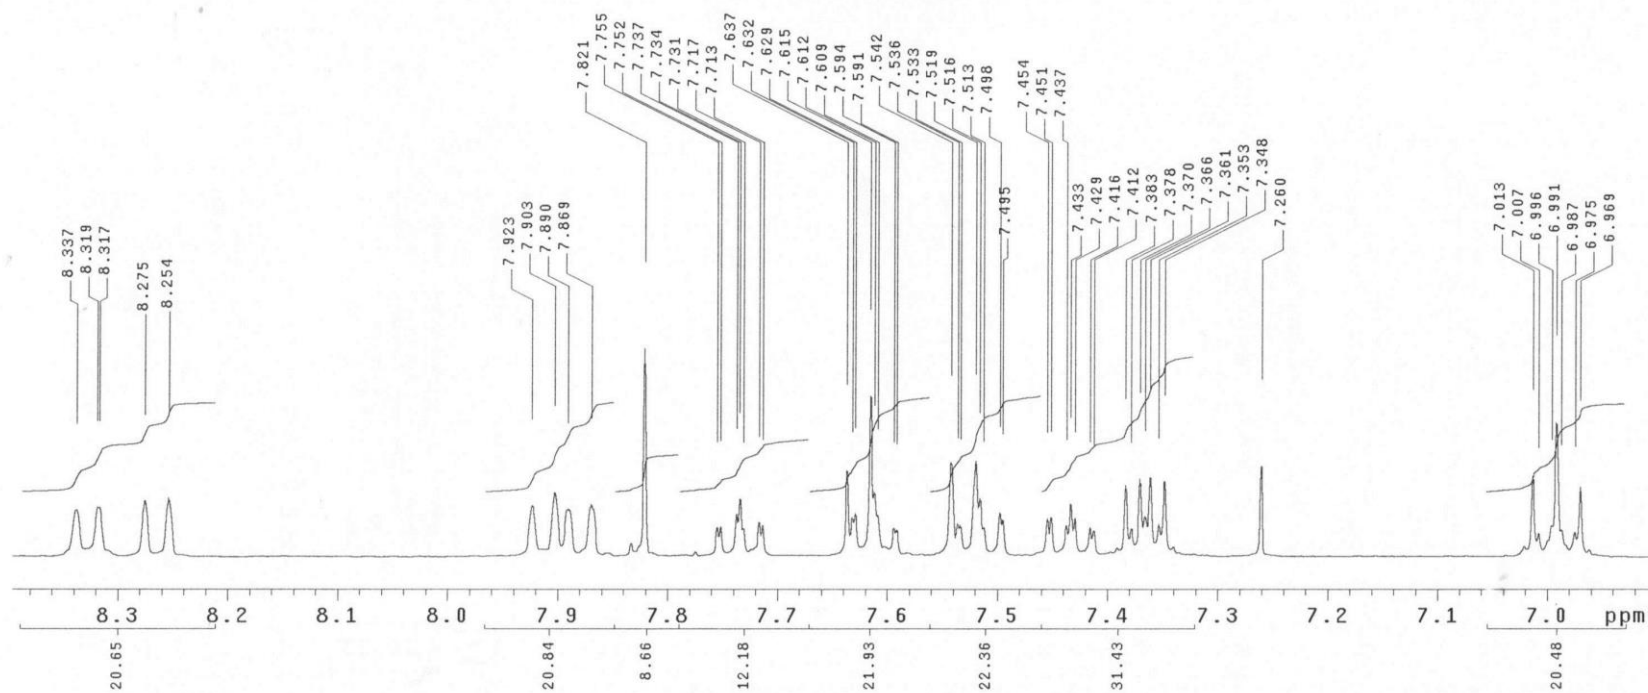

# Compound 5c (<sup>13</sup>C-NMR spectral data)

YTF4749

Pulse Sequence: s2pu1

UNITYplus-400 "unity400"

Date: Mar 27 2018

Solvent: CDCl<sub>3</sub>

Ambient temperature

Total 5056 repetitions

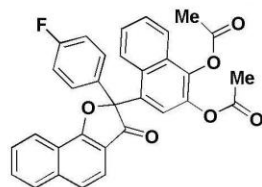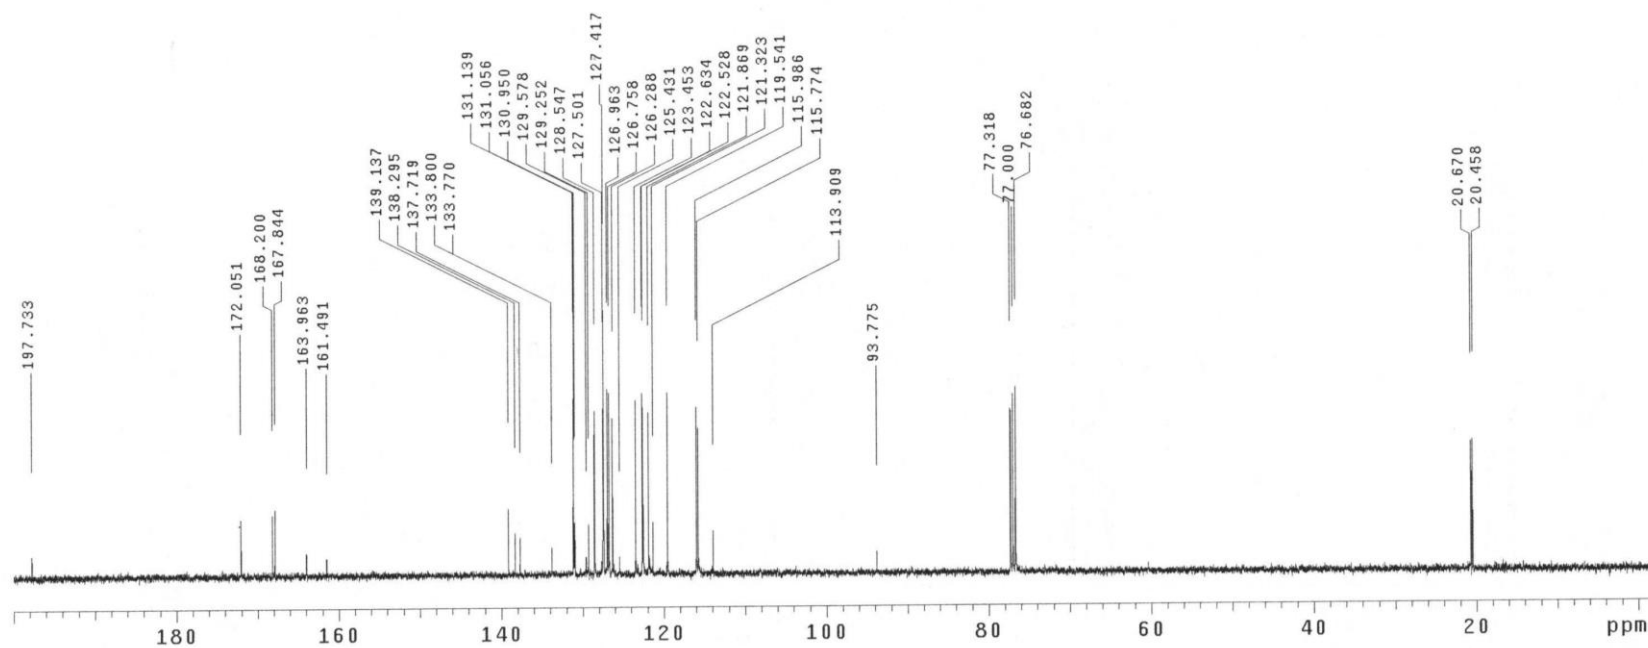



# Compound 5d (<sup>1</sup>H-NMR spectral data-1)

YTM47

Pulse Sequence: s2pu1  
 UNITYplus-400 "unity400"  
 Date: Jun 27 2019  
 Solvent: CDCl<sub>3</sub>  
 Ambient temperature  
 Total 68 repetitions

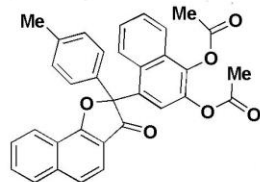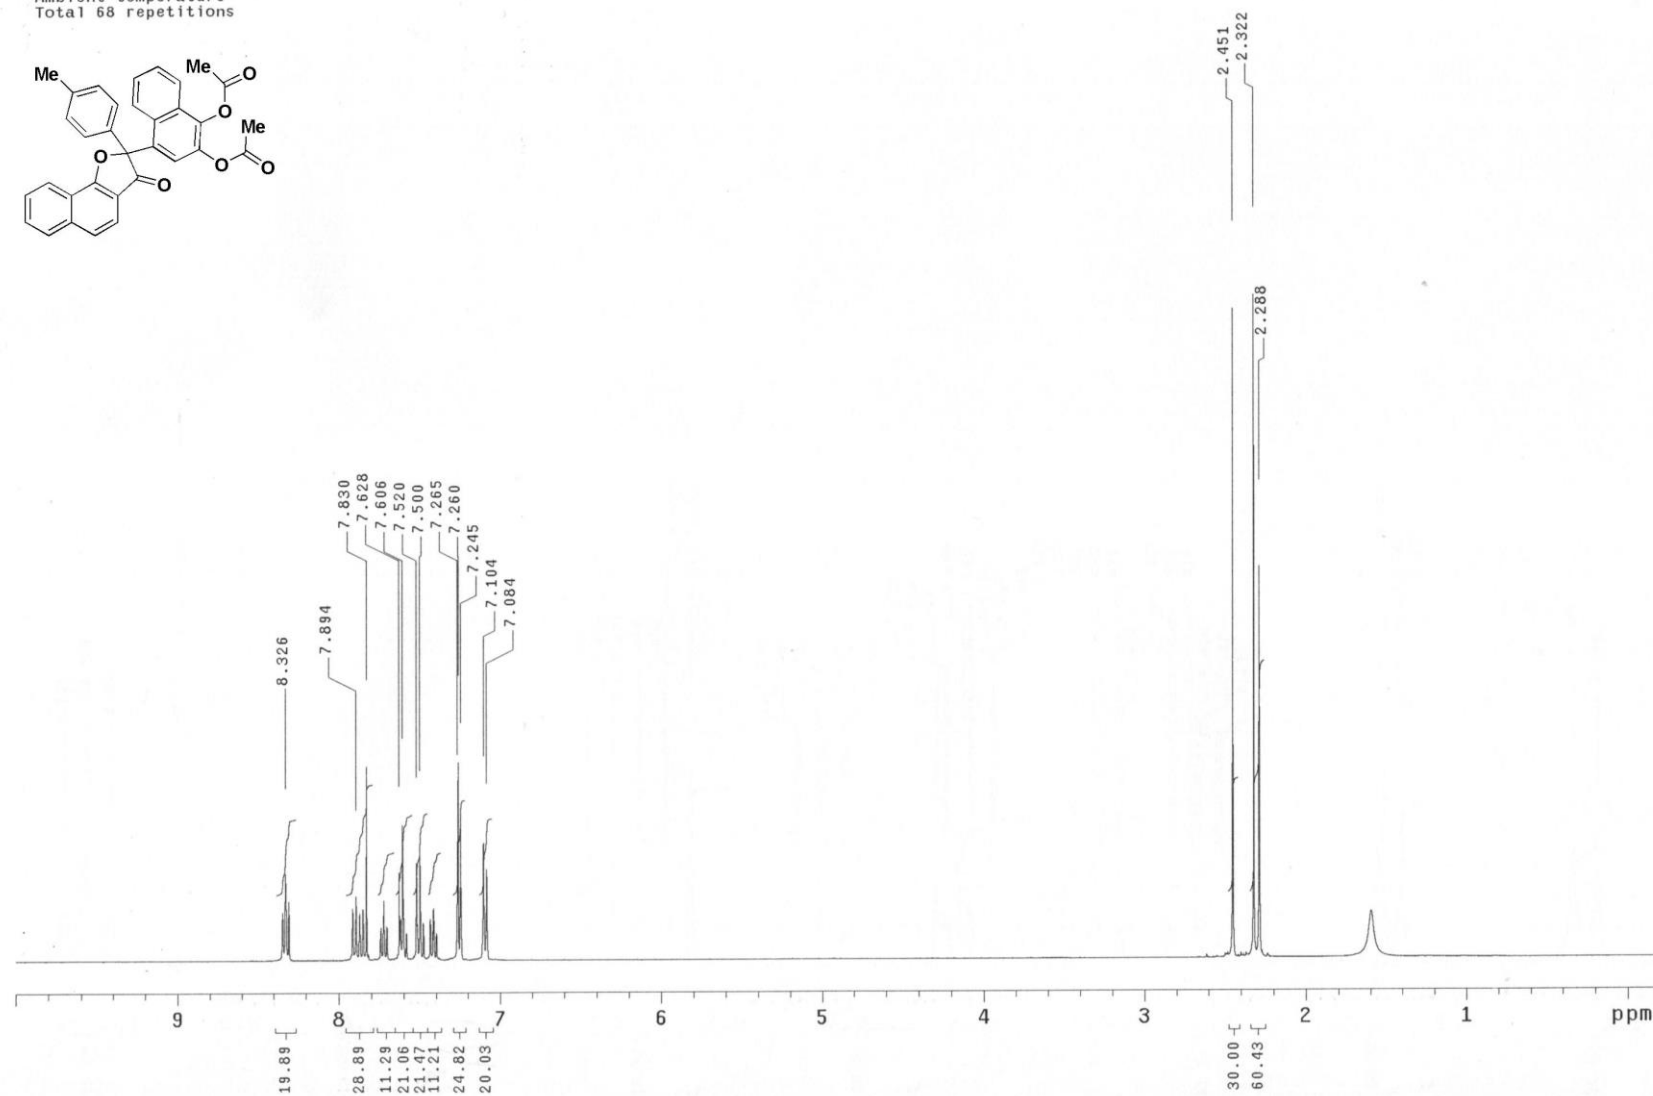

# Compound 5d (<sup>1</sup>H-NMR spectral data-2)

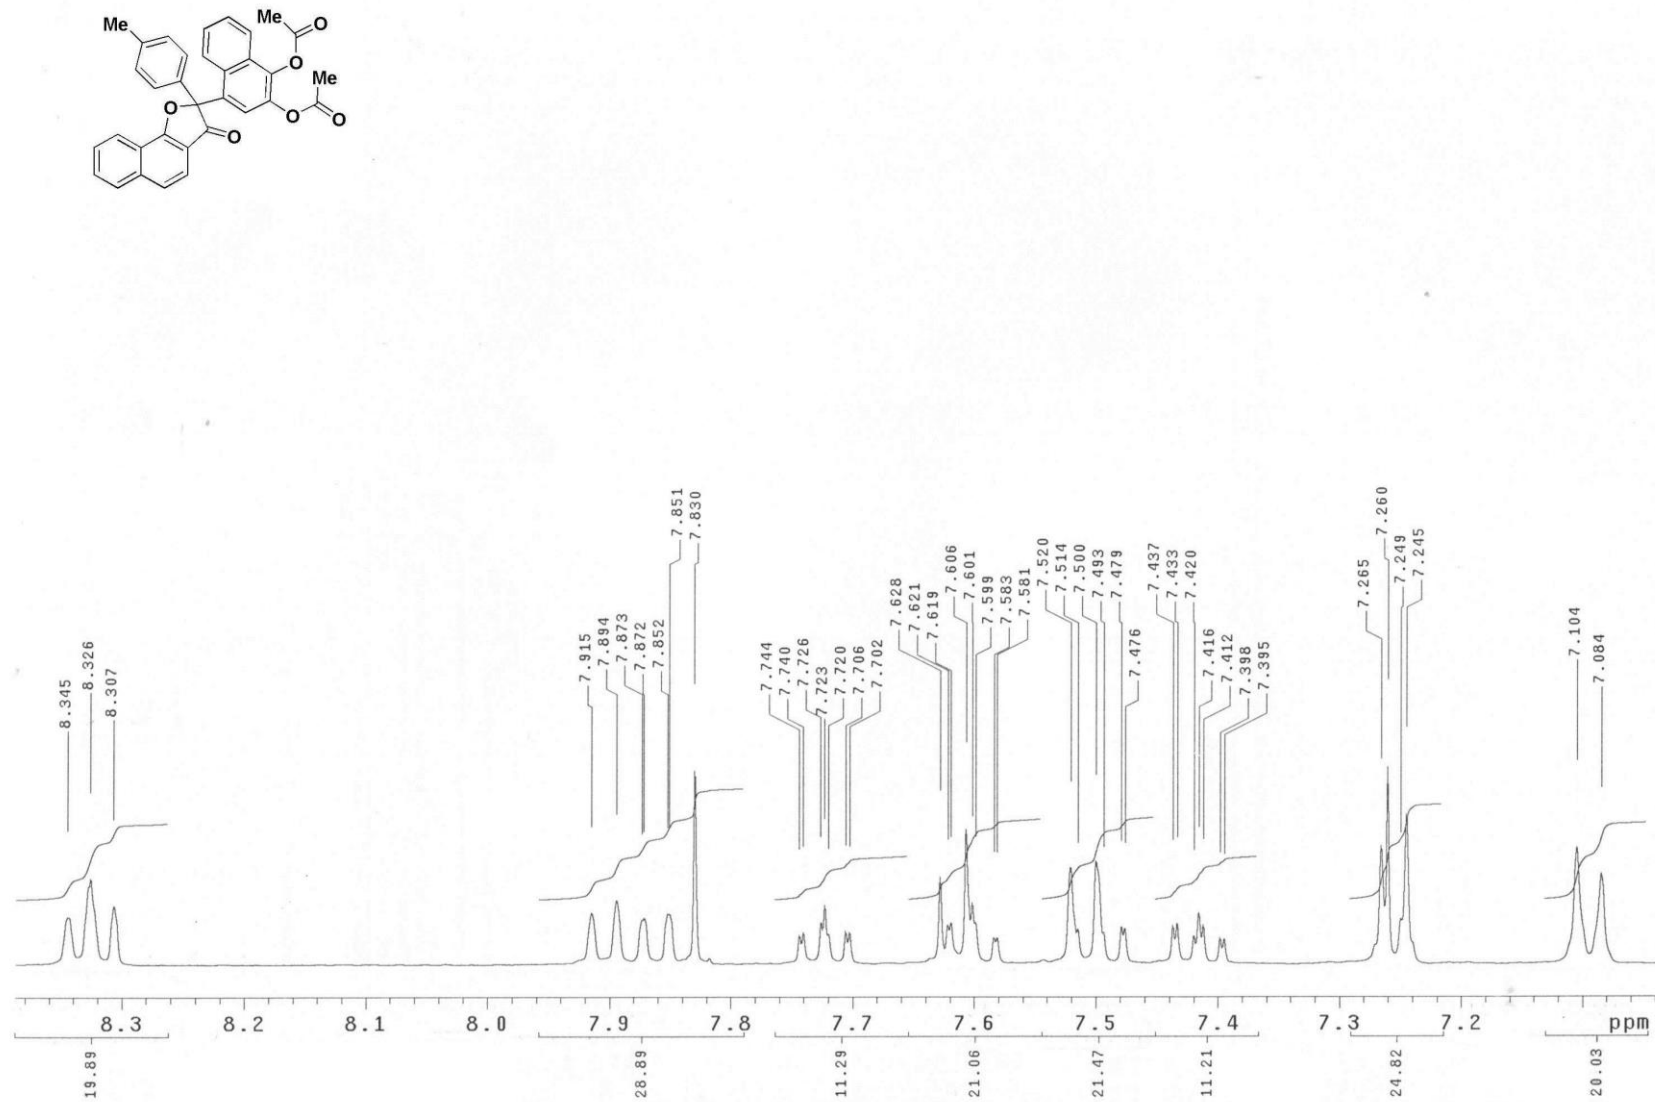

# Compound 5d (<sup>13</sup>C-NMR spectral data)

YTM47

Pulse Sequence: s2pu1  
 UNITYplus-400 "unity400"  
 Date: Mar 12 2018  
 Solvent: CDCl<sub>3</sub>  
 Ambient temperature  
 Total 2896 repetitions

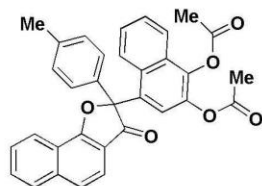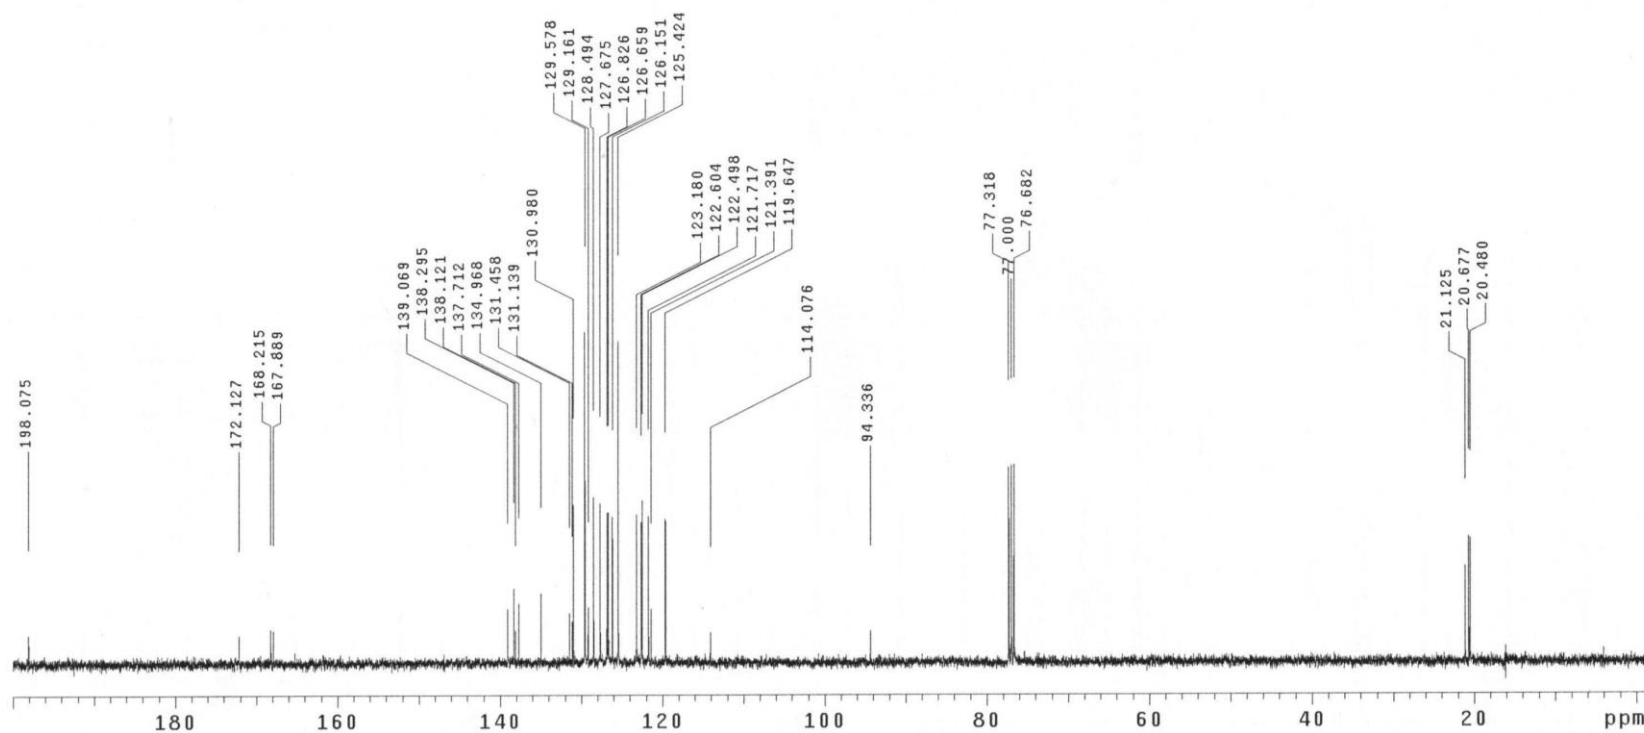

# Compound 5e (<sup>1</sup>H-NMR spectral data-1)

YTPH60

Pulse Sequence: s2pu1

UNITYplus-400 "unity400"

Date: May 3 2018

Solvent: CDCl<sub>3</sub>

Ambient temperature

Total 80 repetitions

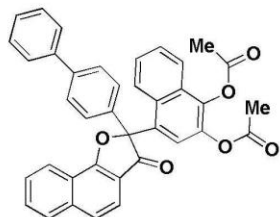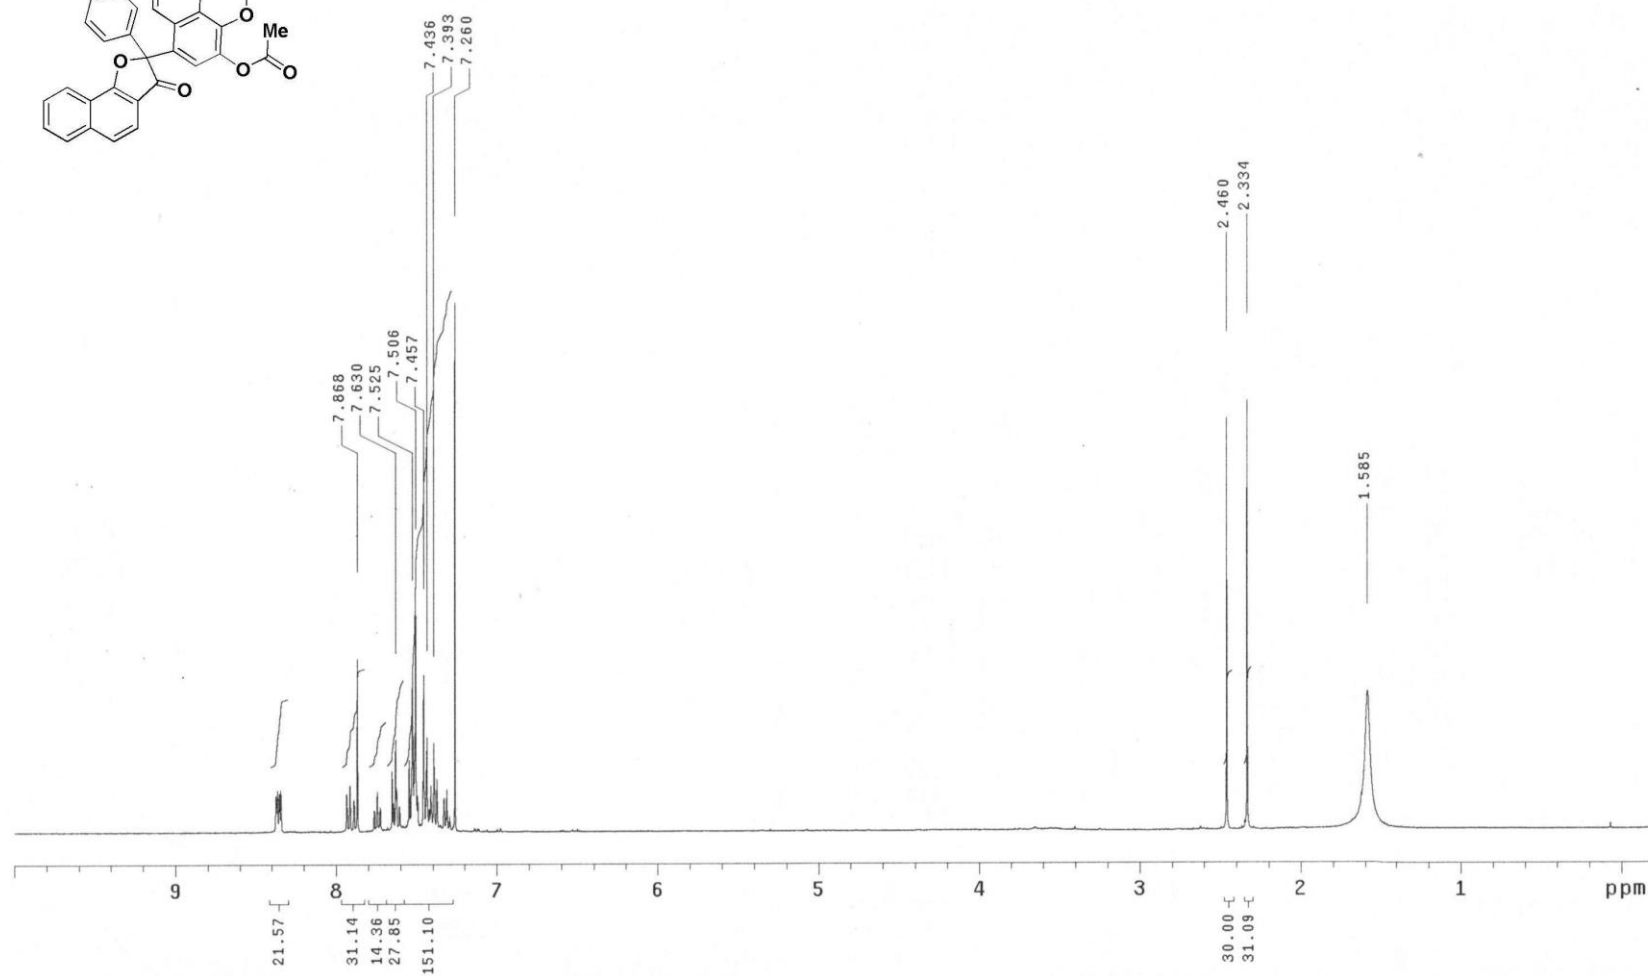

# Compound 5e (<sup>1</sup>H-NMR spectral data-2)

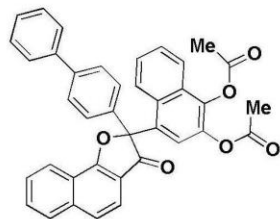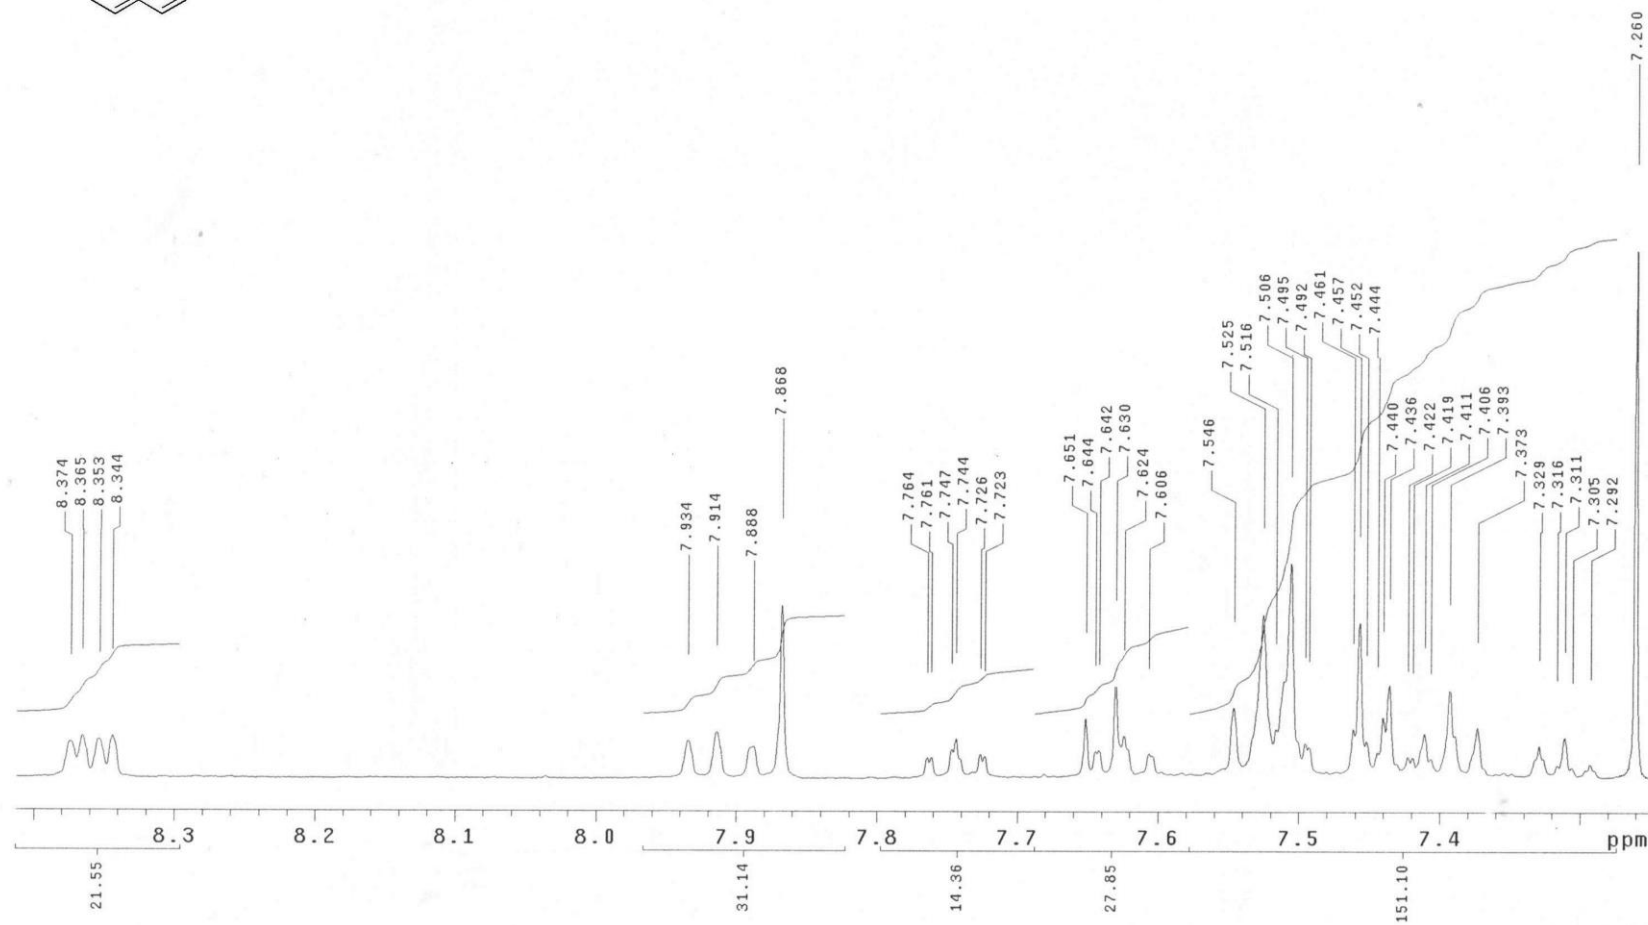

# Compound 5e (<sup>13</sup>C-NMR spectral data-1)

YTPH60

Pulse Sequence: s2pu1  
 UNITYplus-400 "unity400"  
 Date: May 3 2018  
 Solvent: CDCl<sub>3</sub>  
 Ambient temperature  
 Total 20480 repetitions

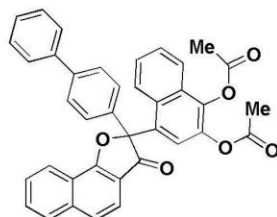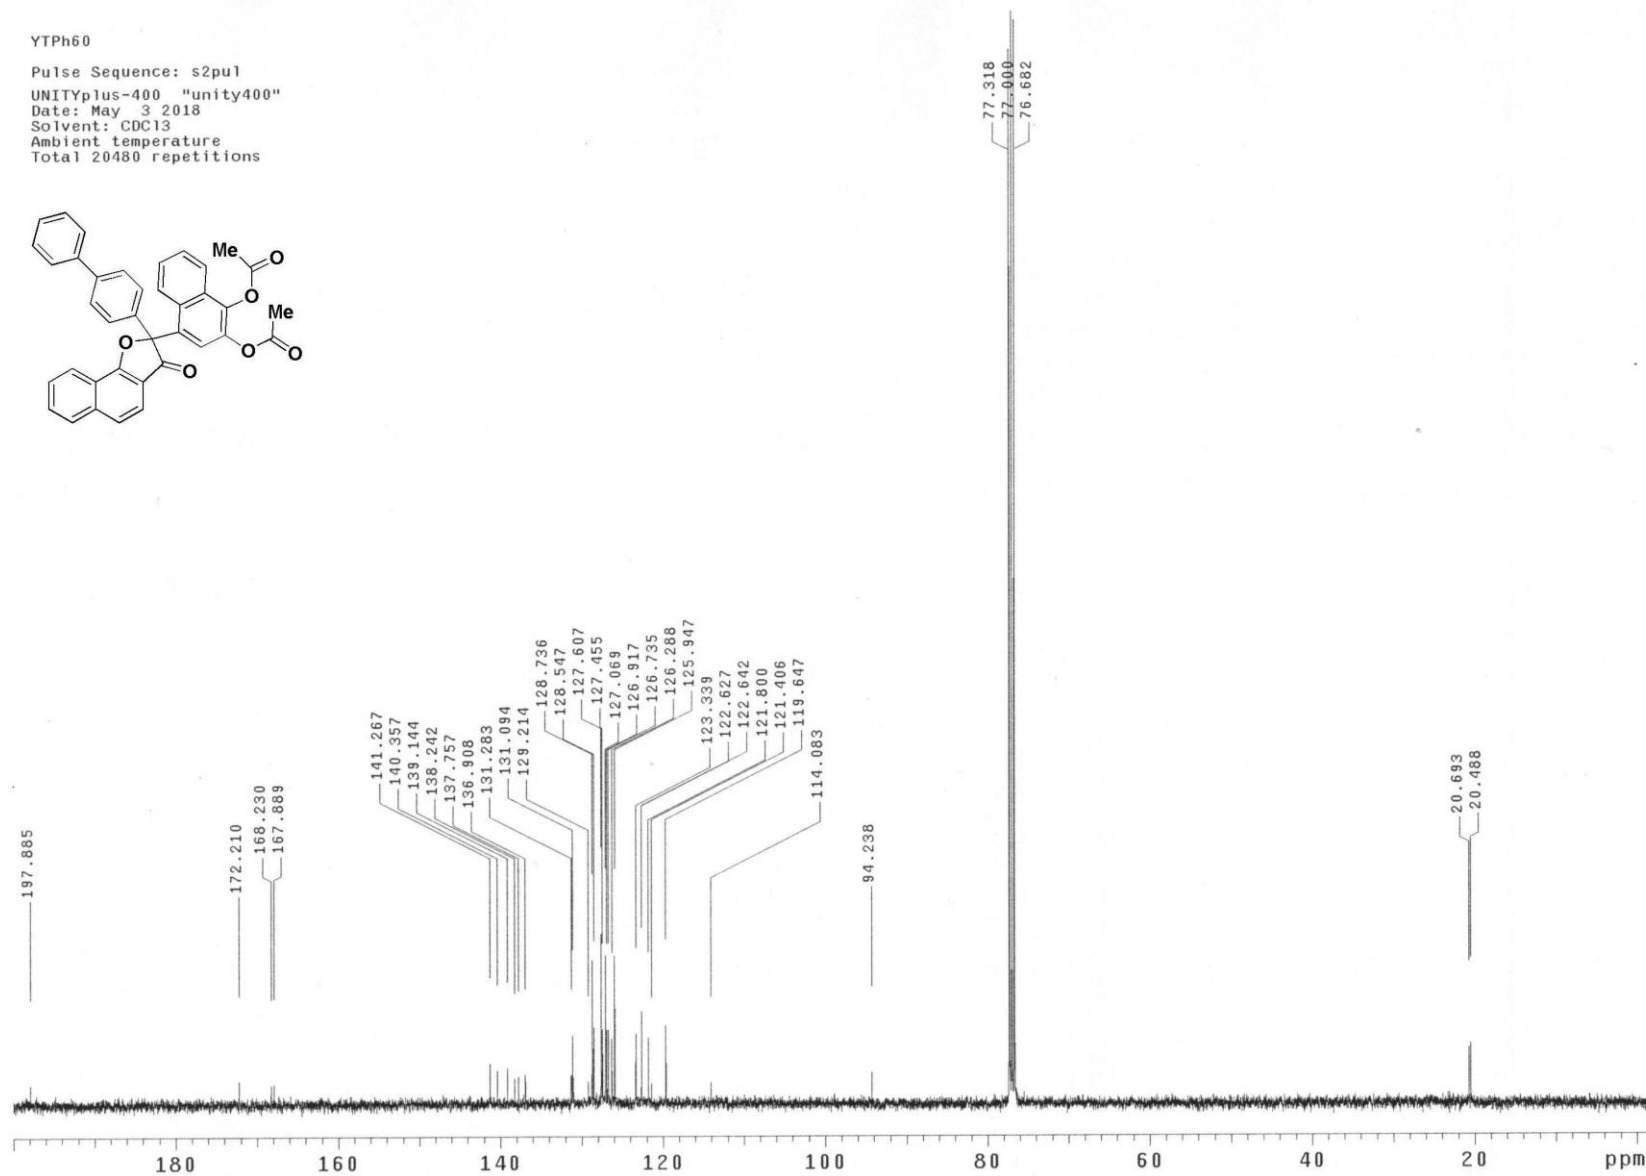

# Compound 5e (<sup>13</sup>C-NMR spectral data-2)

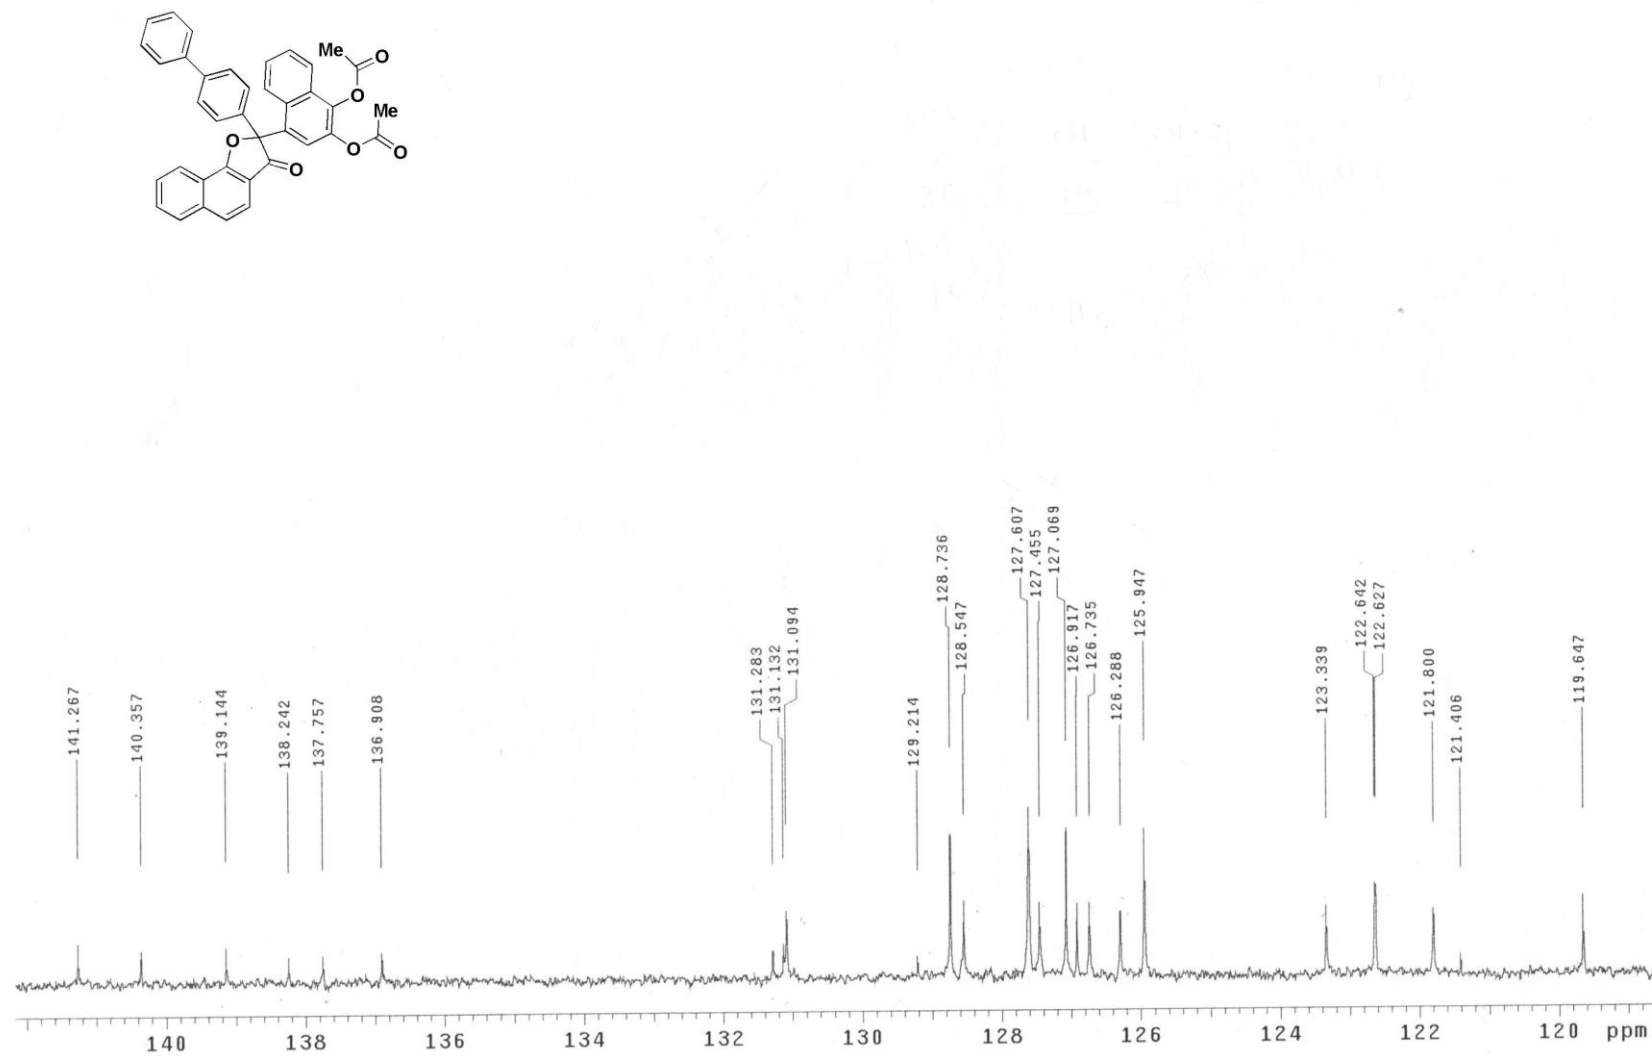

# Compound 5f (<sup>1</sup>H-NMR spectral data-1)

YT02AC20

Pulse Sequence: s2pu1

UNITYplus-400 "unity400"

Date: Jun 22 2018

Solvent: CDCl<sub>3</sub>

Ambient temperature

Total 64 repetitions

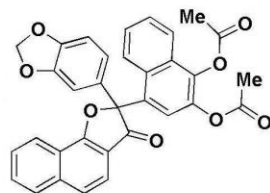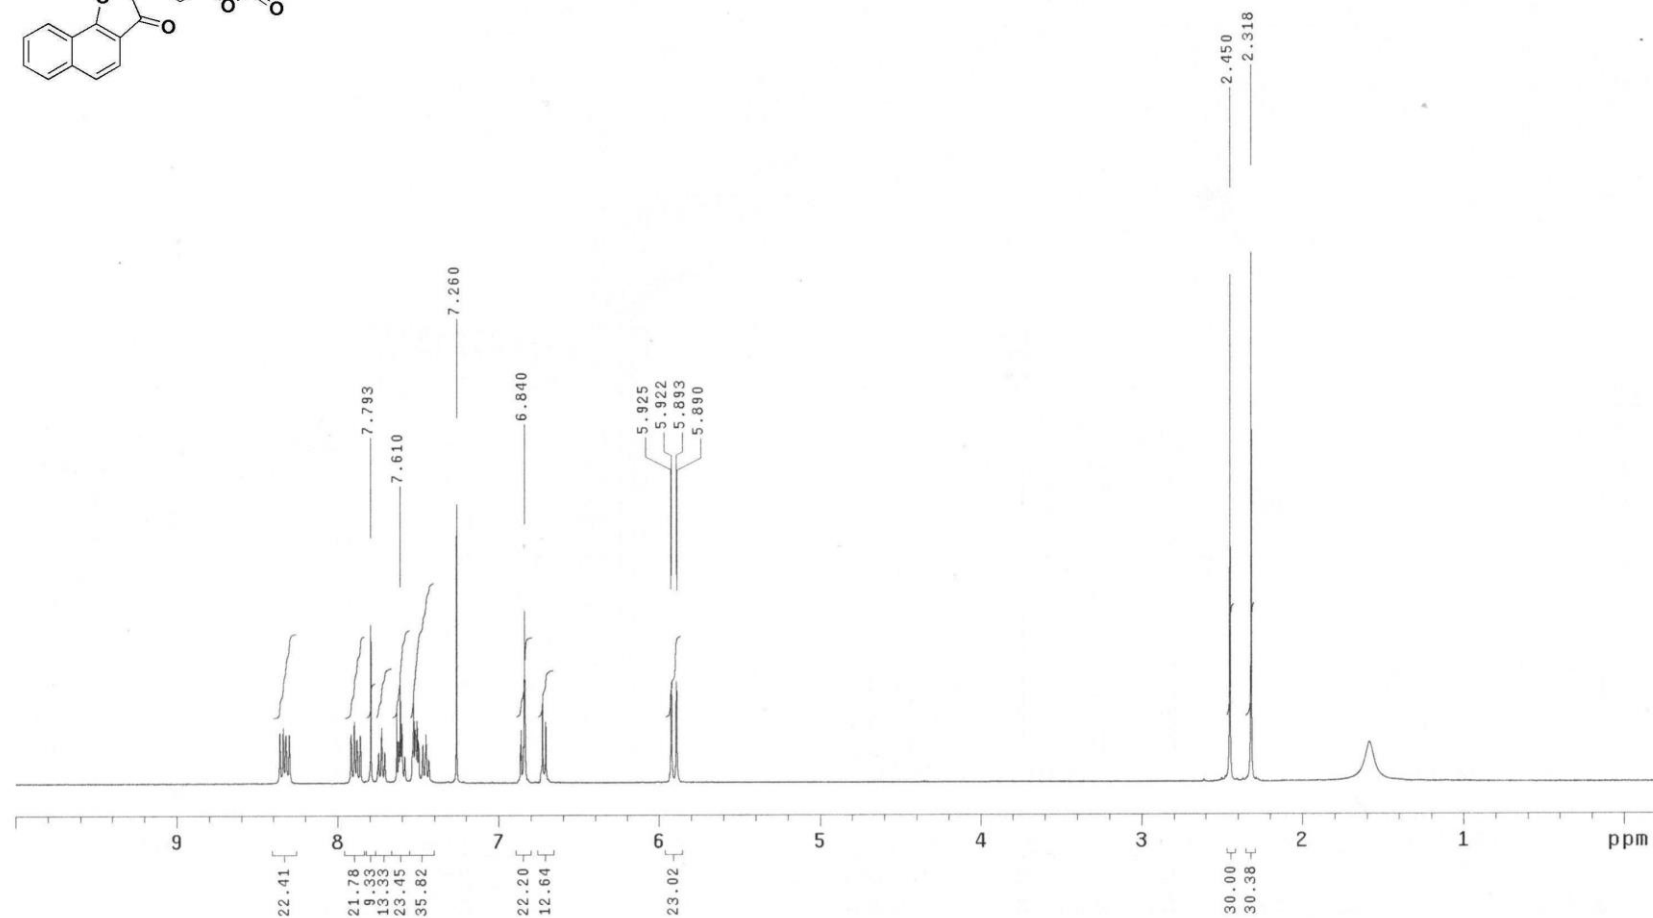



# Compound 5f (<sup>1</sup>H-NMR spectral data-2)

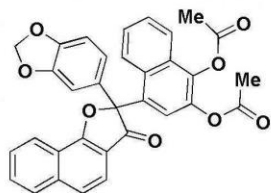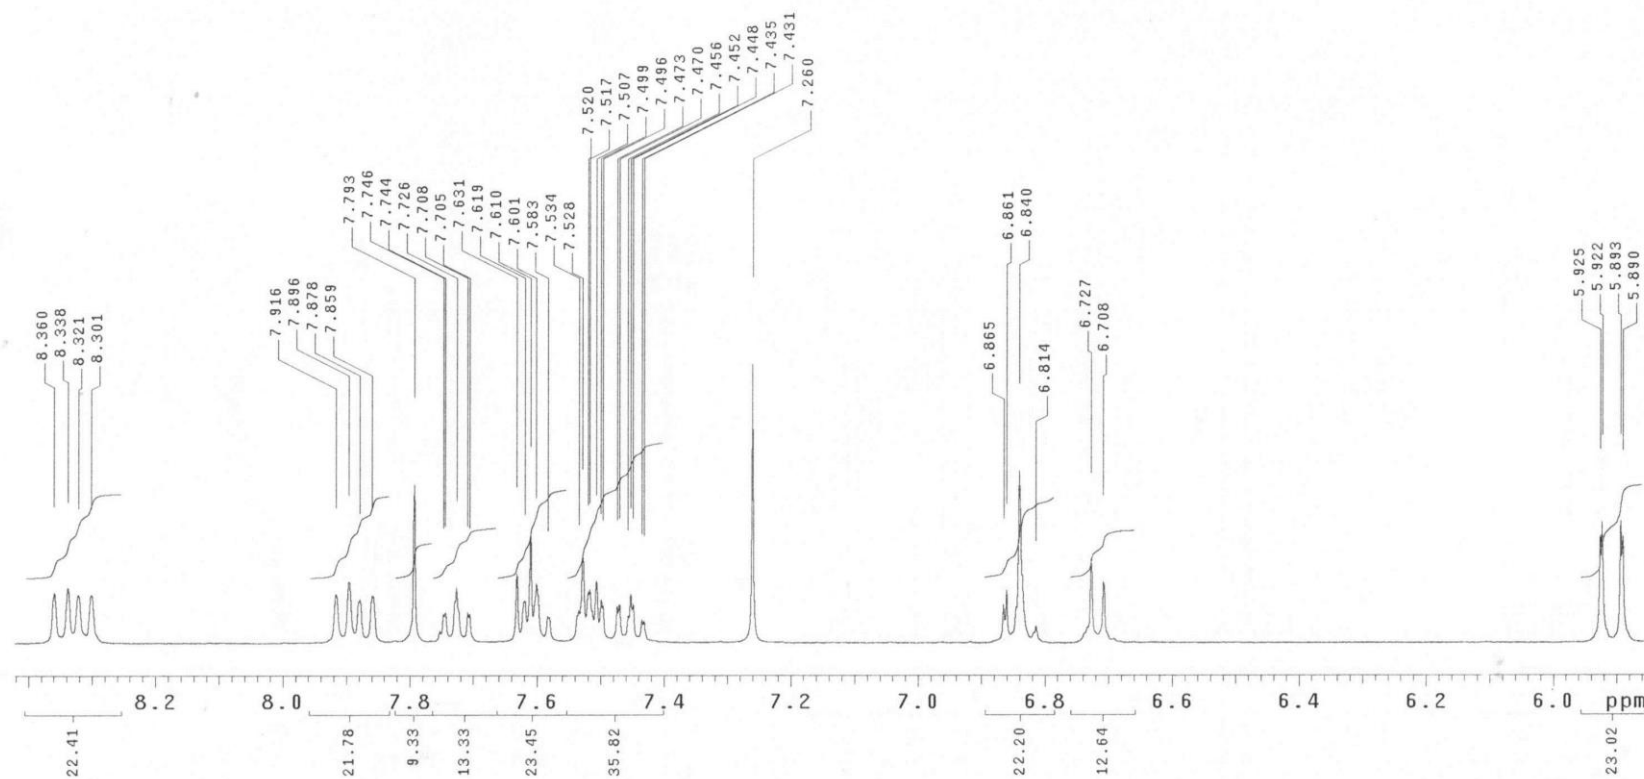

# Compound 5f (<sup>13</sup>C-NMR spectral data)

YT02AC20

Pulse Sequence: s2pu1

UNITYplus-400 "unity400"

Date: Jun 22 2018

Solvent: CDCl<sub>3</sub>

Ambient temperature

Total 7824 repetitions

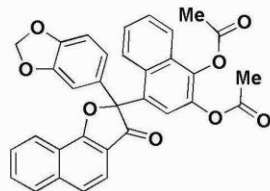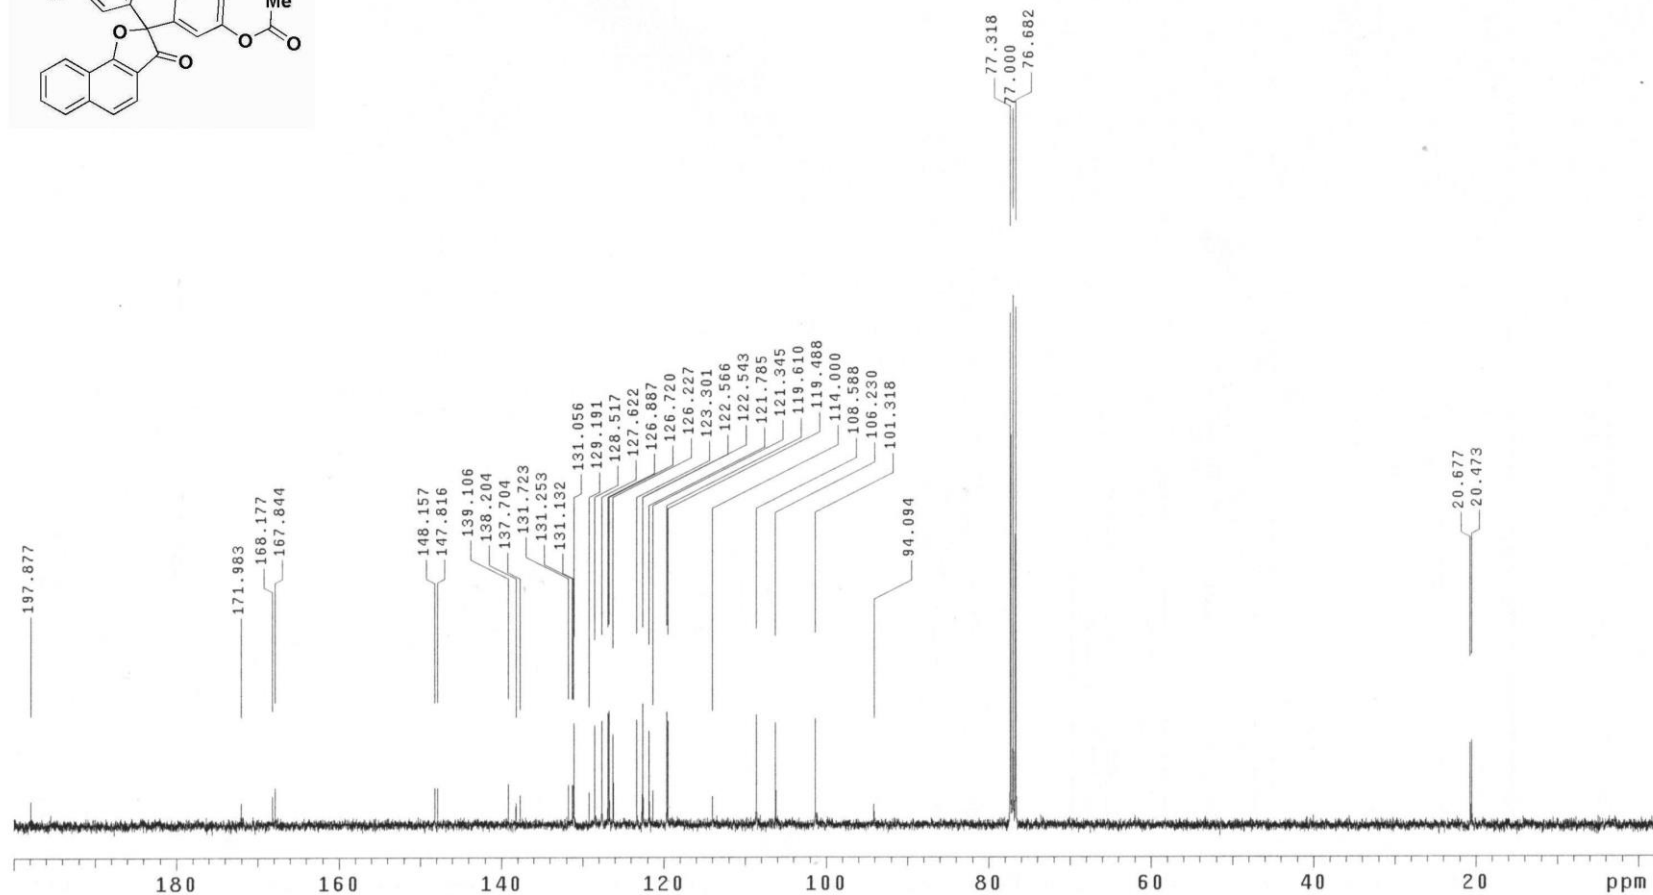

# Compound 5g (<sup>1</sup>H-NMR spectral data-1)

YTN1SP

Pulse Sequence: s2pu1

UNITYplus-400 "unity400"

Date: May 4 2018

Solvent: CDCl<sub>3</sub>

Ambient temperature

Total 32 repetitions

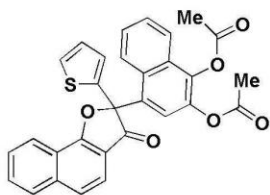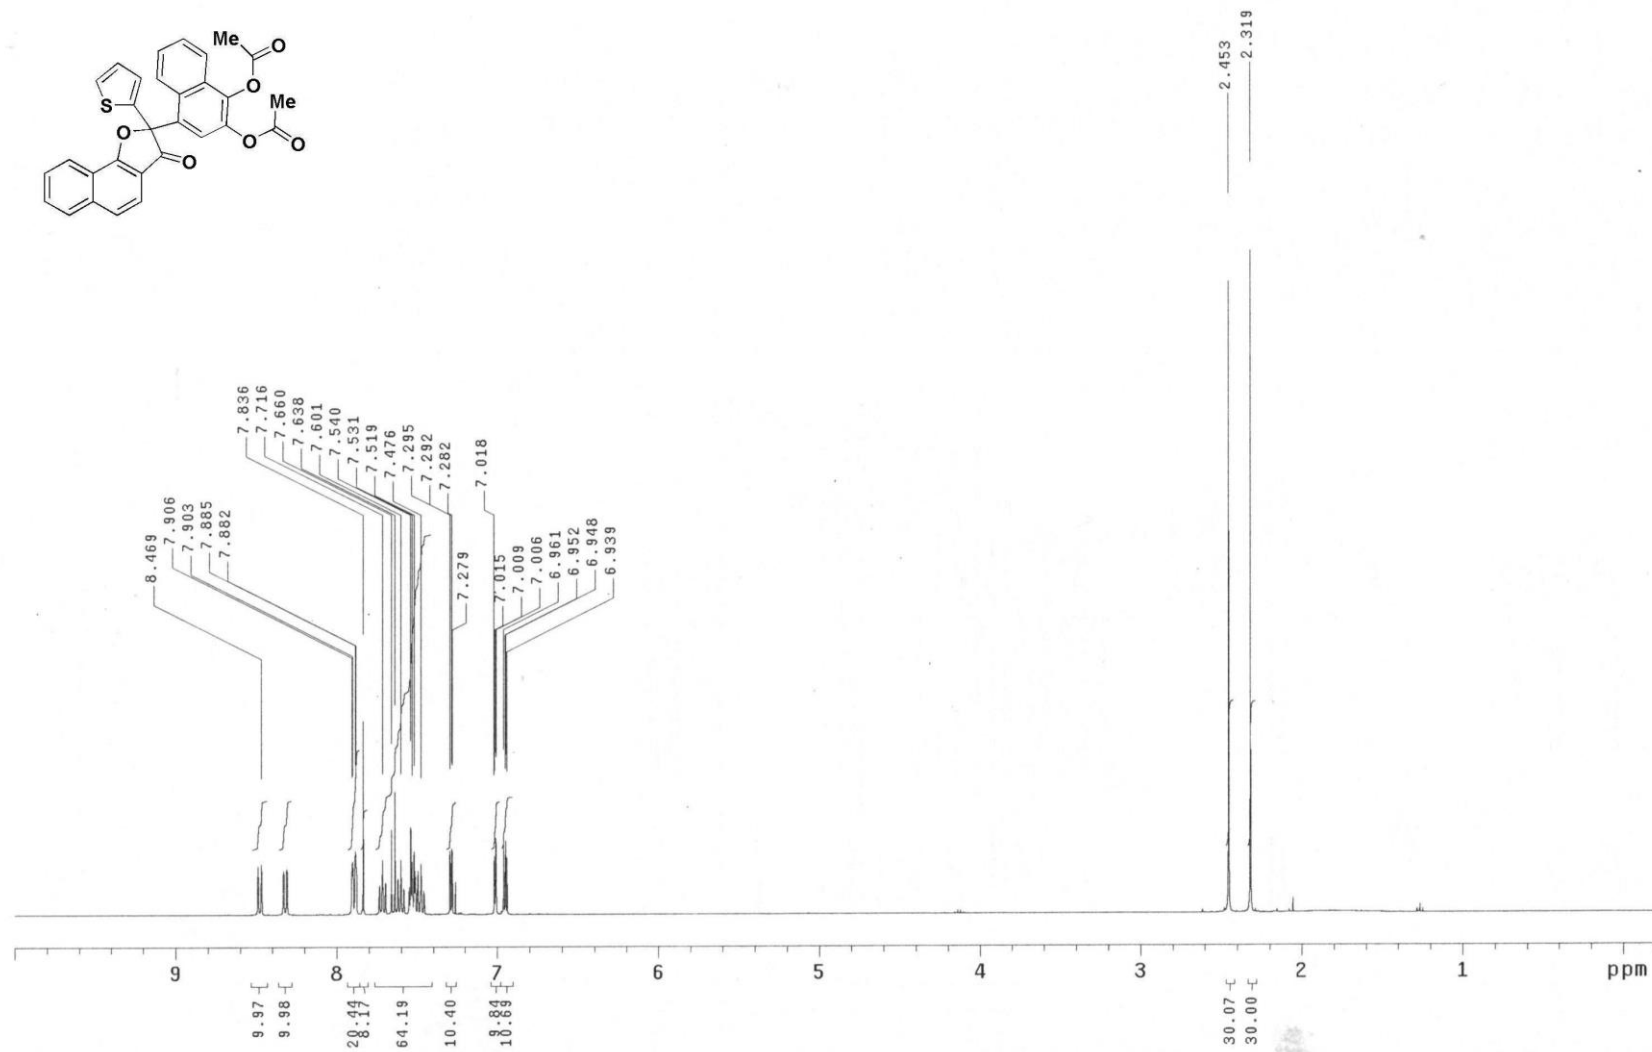

# Compound 5g (<sup>1</sup>H-NMR spectral data-2)

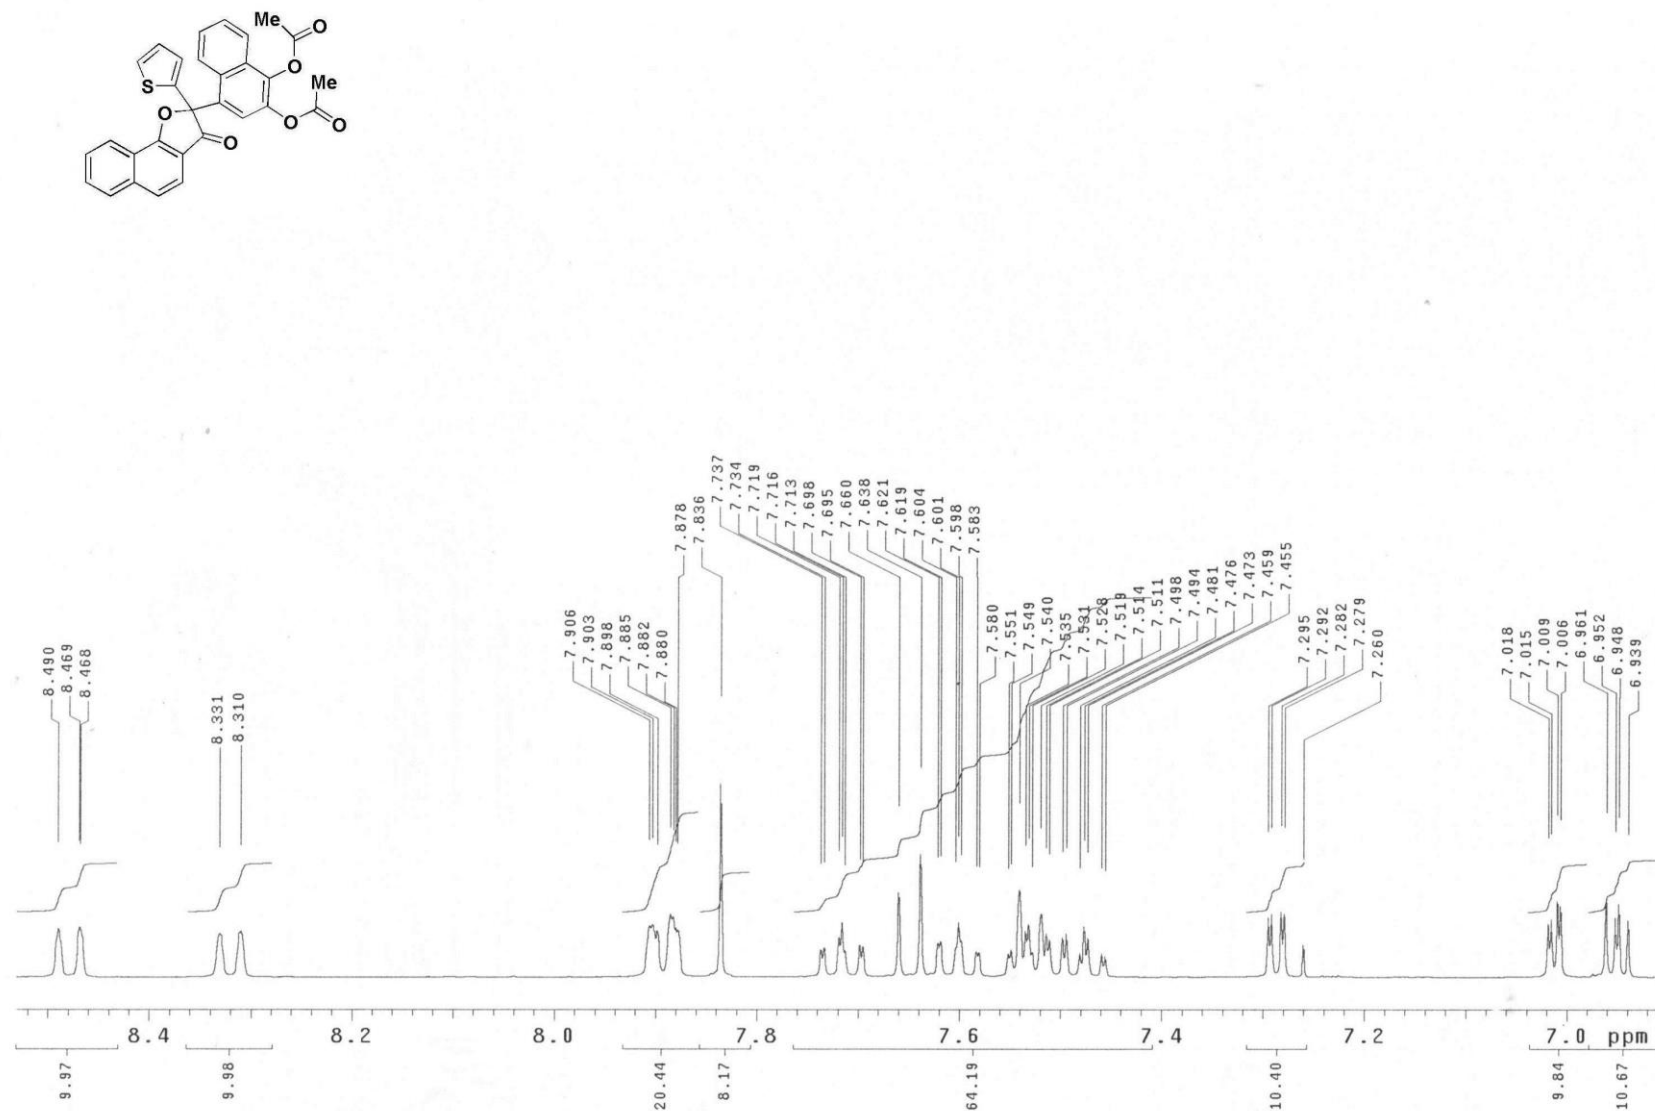

# Compound 5g (<sup>13</sup>C-NMR spectral data)

YTN1SP

Pulse Sequence: s2pu1

UNITYplus-400 "unity400"

Date: May 4 2018

Solvent: CDCl<sub>3</sub>

Ambient temperature

Total 576 repetitions

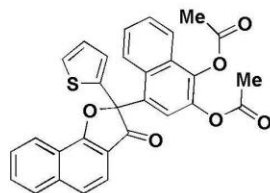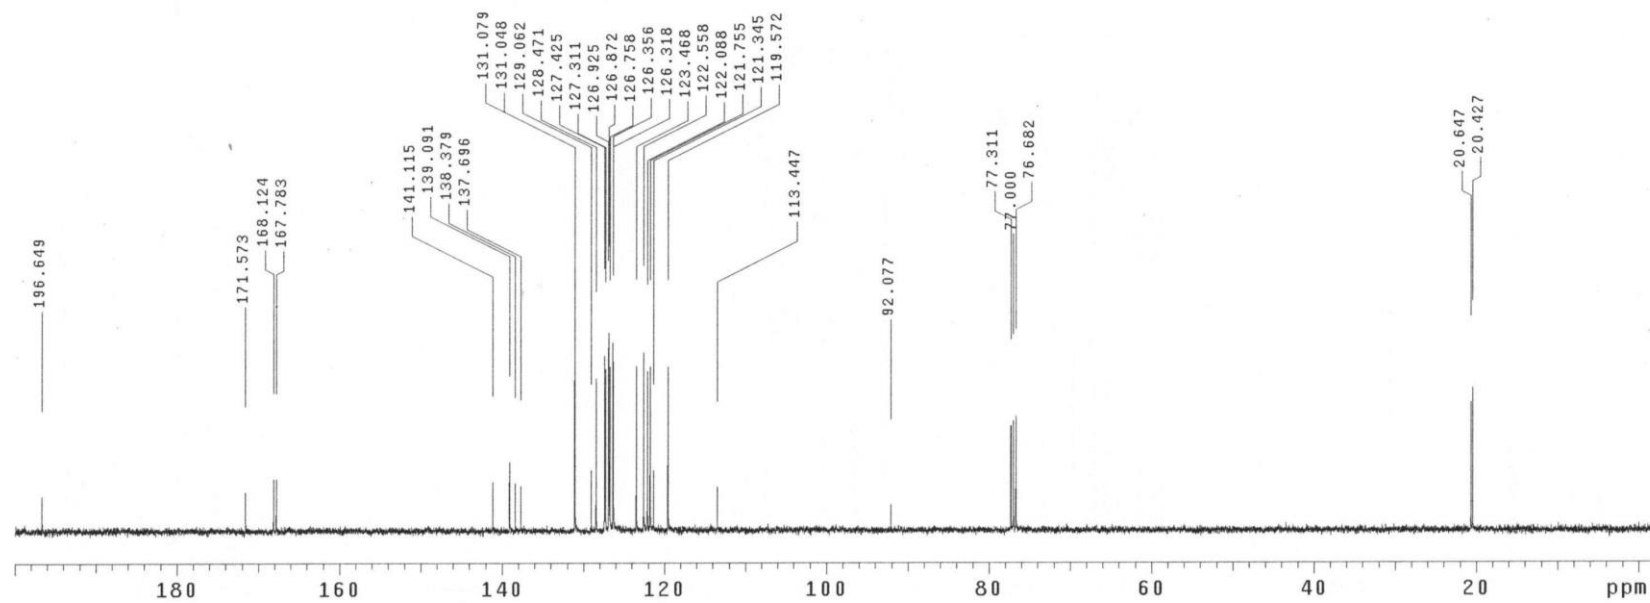

# Compound 5h (<sup>1</sup>H-NMR spectral data-1)

YTB3435

Pulse Sequence: s2pu1

UNITYplus-400 "unity400"

Date: May 10 2018

Solvent: CDCl<sub>3</sub>

Ambient temperature

Total 64 repetitions

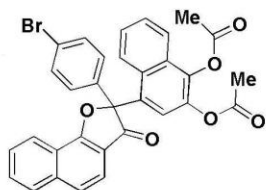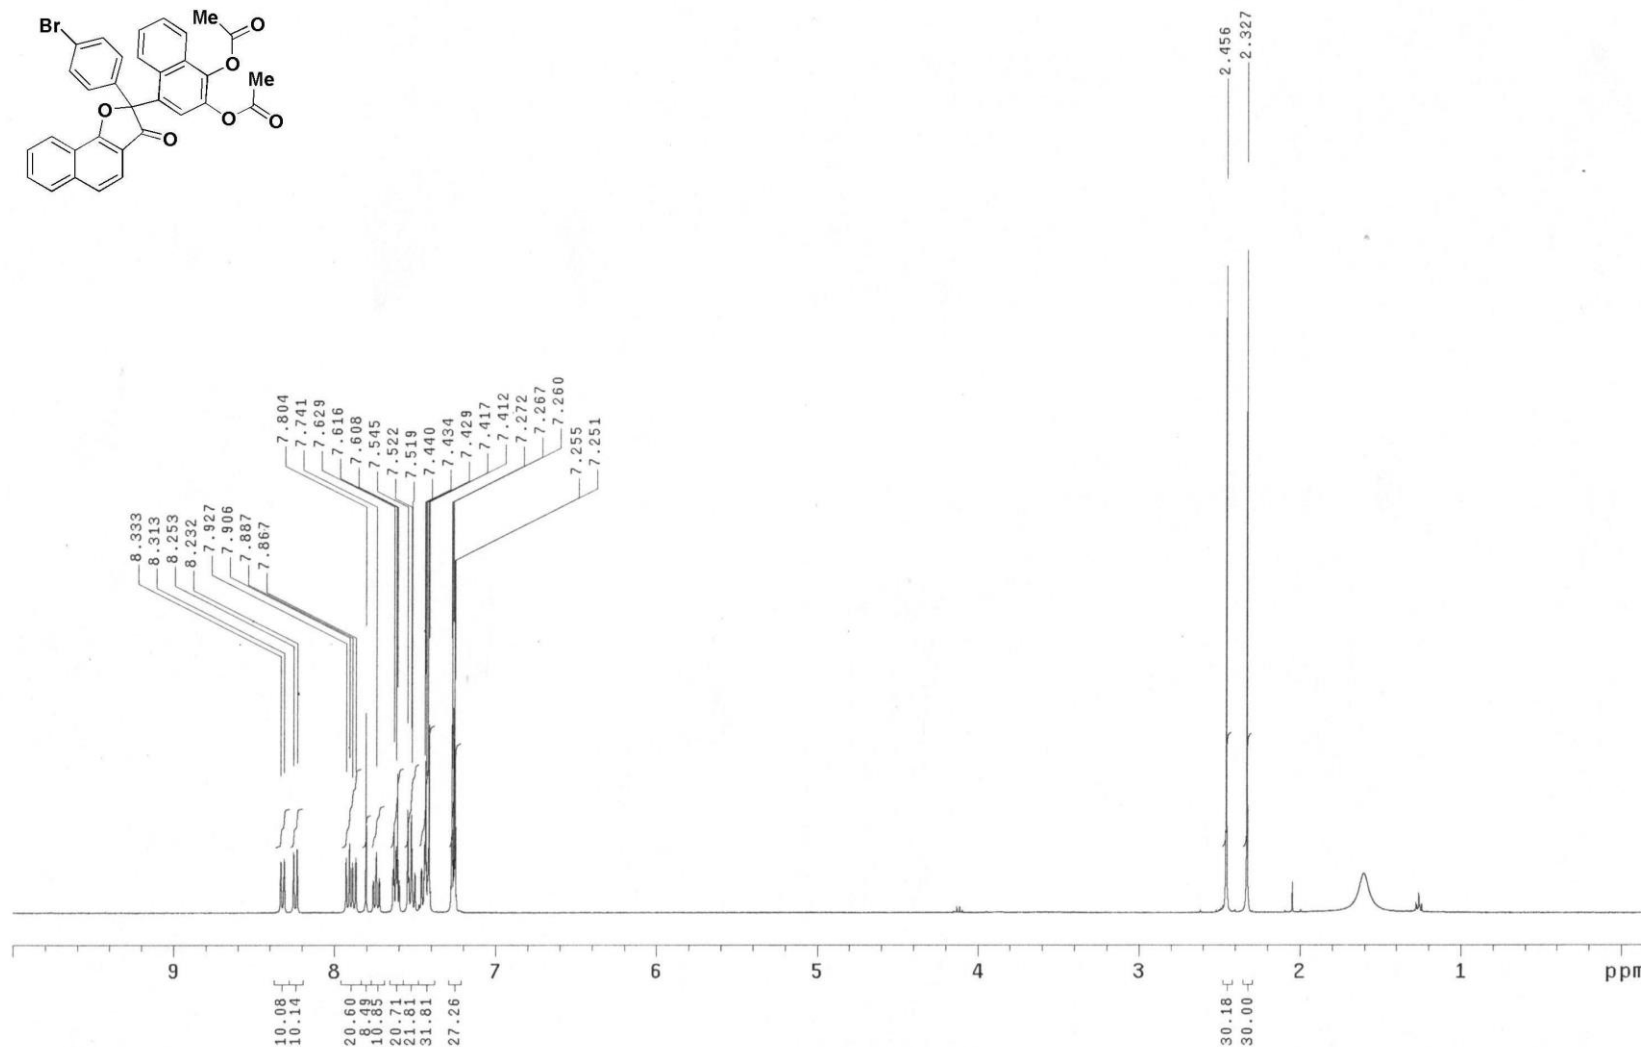

# Compound 5h (<sup>1</sup>H-NMR spectral data-2)

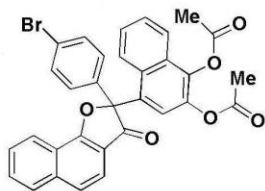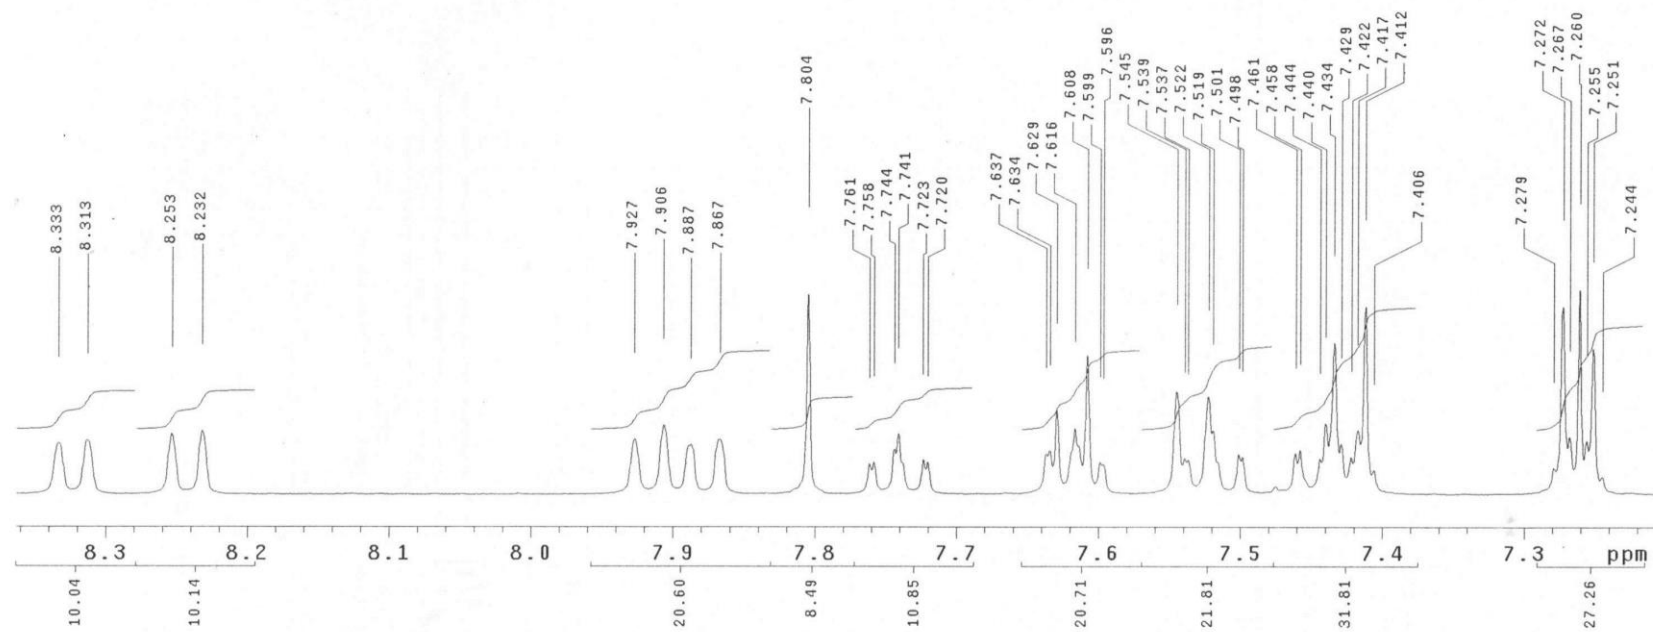

# Compound 5h (<sup>13</sup>C-NMR spectral data)

YTB3435

Pulse Sequence: s2pu1  
 UNITYplus-400 "unity400"  
 Date: May 10 2018  
 Solvent: CDCl<sub>3</sub>  
 Ambient temperature  
 Total 4592 repetitions

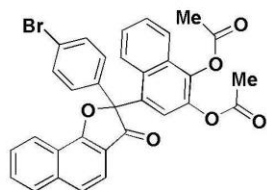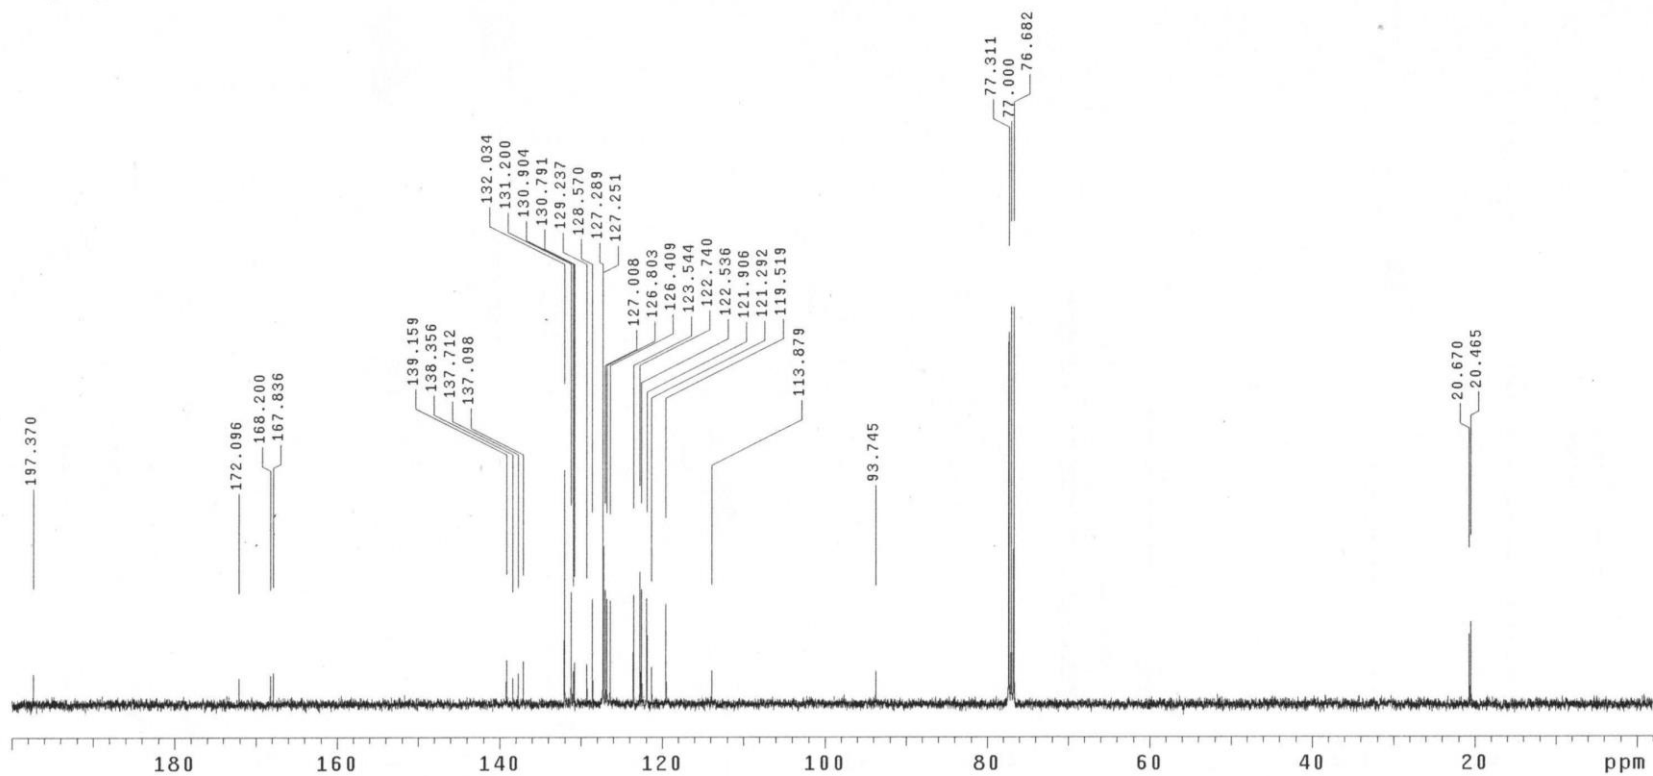



# Compound 5i (<sup>1</sup>H-NMR spectral data-1)

YT2FAC20

Pulse Sequence: s2pu1

UNITYplus-400 "unity400"

Date: May 16 2018

Solvent: CDCl<sub>3</sub>

Ambient temperature

Total 32 repetitions

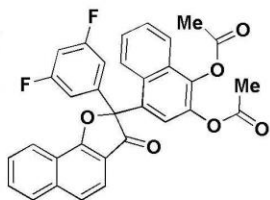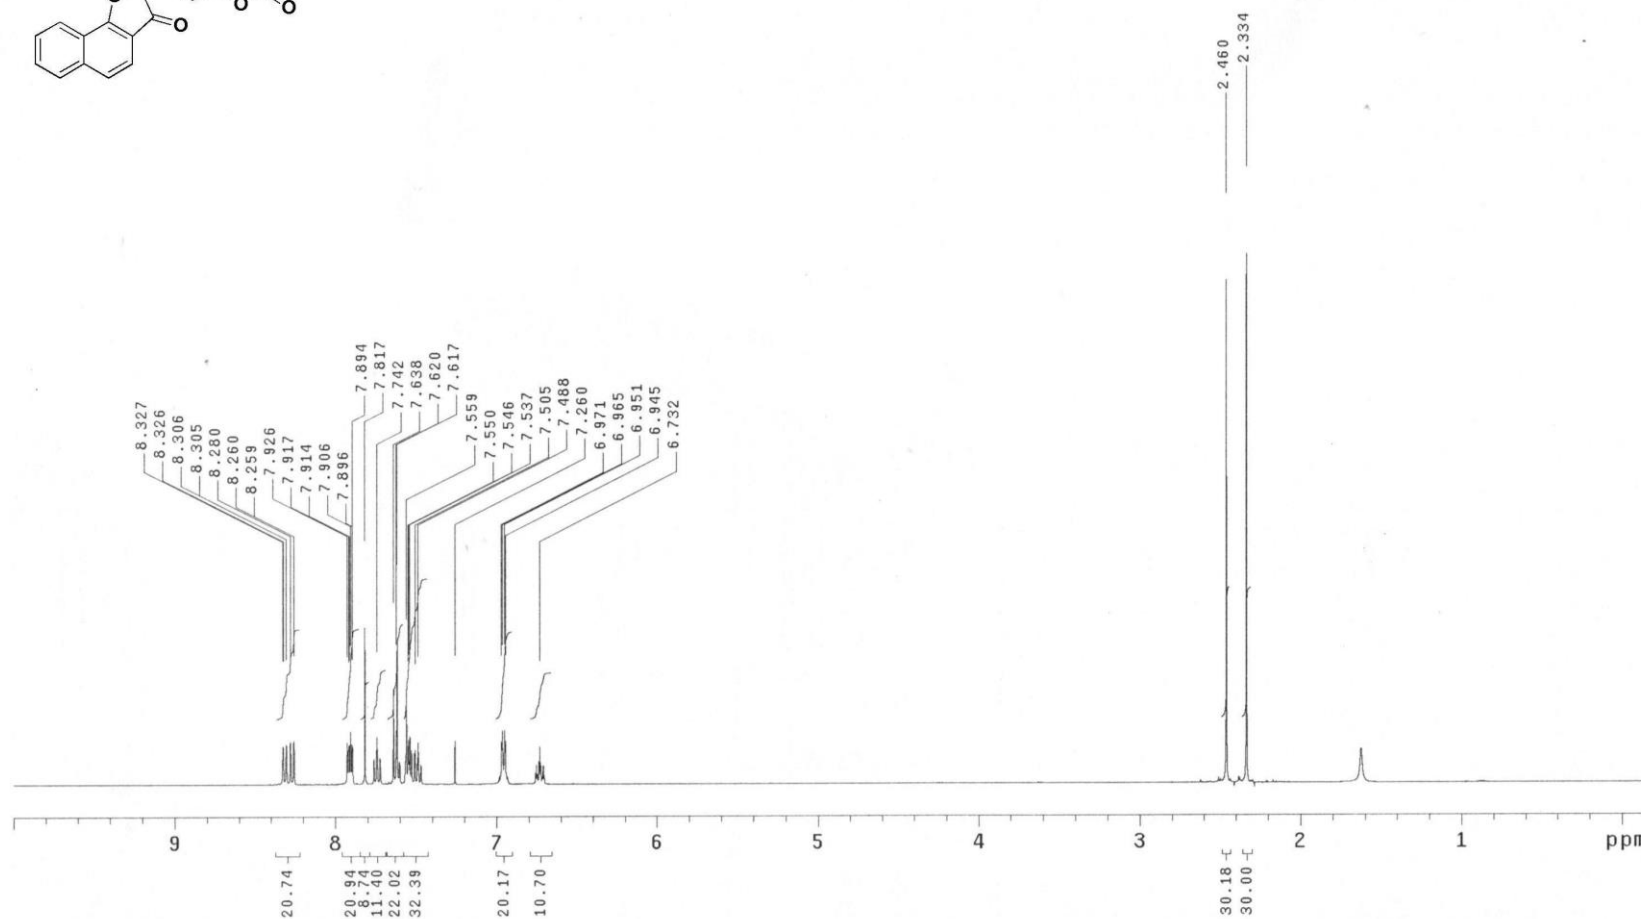

# Compound 5i (<sup>1</sup>H-NMR spectral data-2)

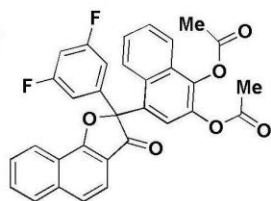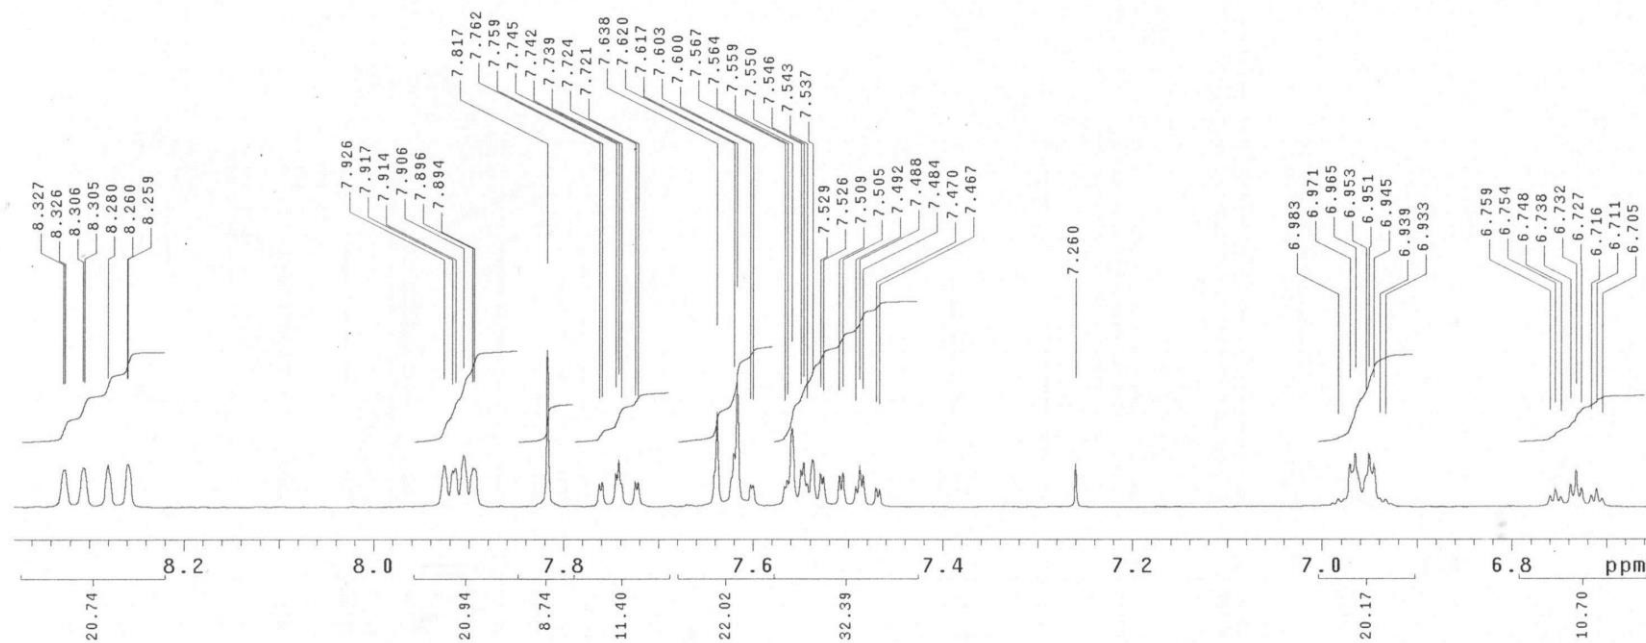

# Compound 5i (<sup>13</sup>C-NMR spectral data)

YT2FAC20

Pulse Sequence: s2pu1  
UNITYplus-400 "unity400"  
Date: May 16 2018  
Solvent: CDCl<sub>3</sub>  
Ambient temperature  
Total 3680 repetitions

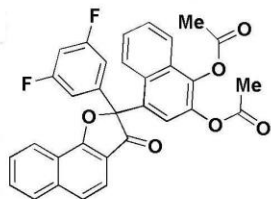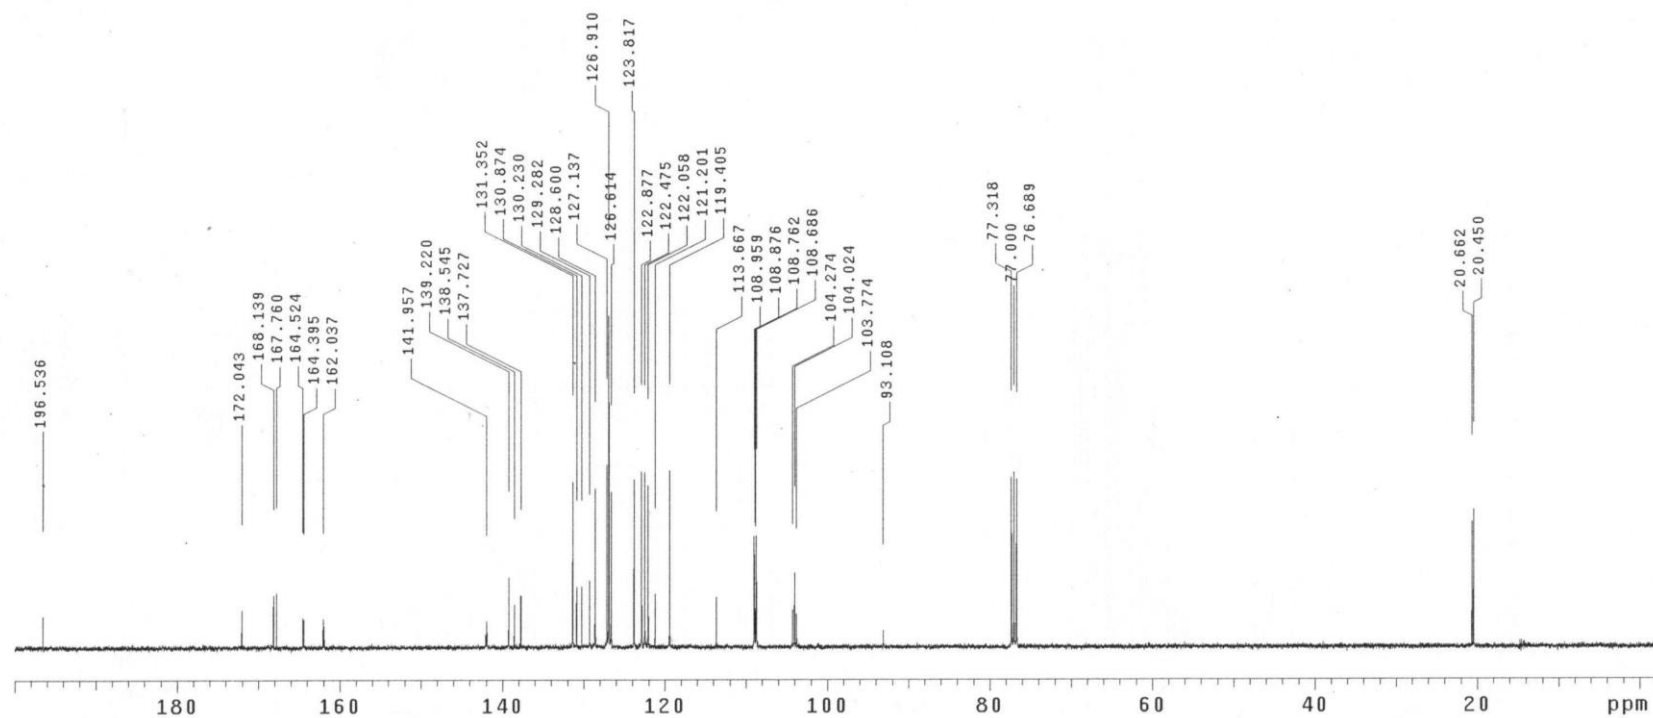

# Compound 5j (<sup>1</sup>H-NMR spectral data-1)

YTCF3AC20

Pulse Sequence: s2pu1

UNITYplus-400 "unity400"

Date: Jun 7 2018

Solvent: CDC13

Ambient temperature

Total 32 repetitions

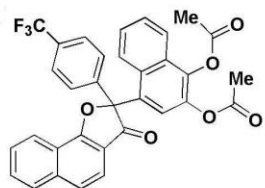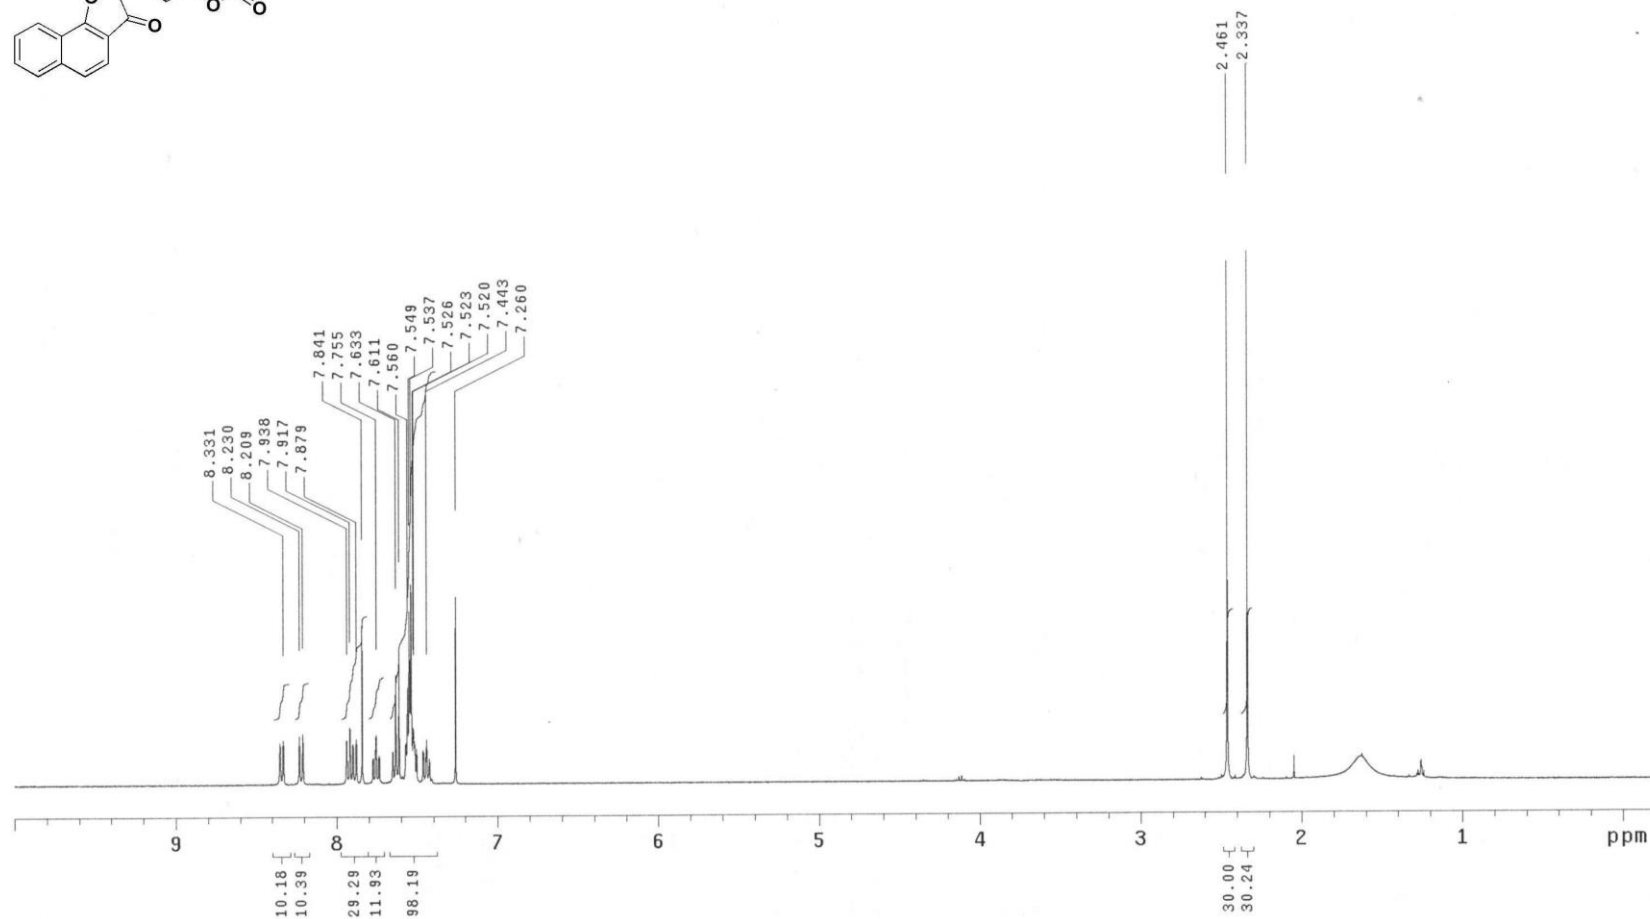

# Compound 5j (<sup>1</sup>H-NMR spectral data-2)

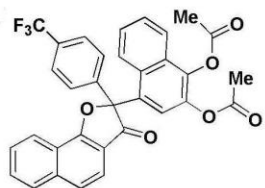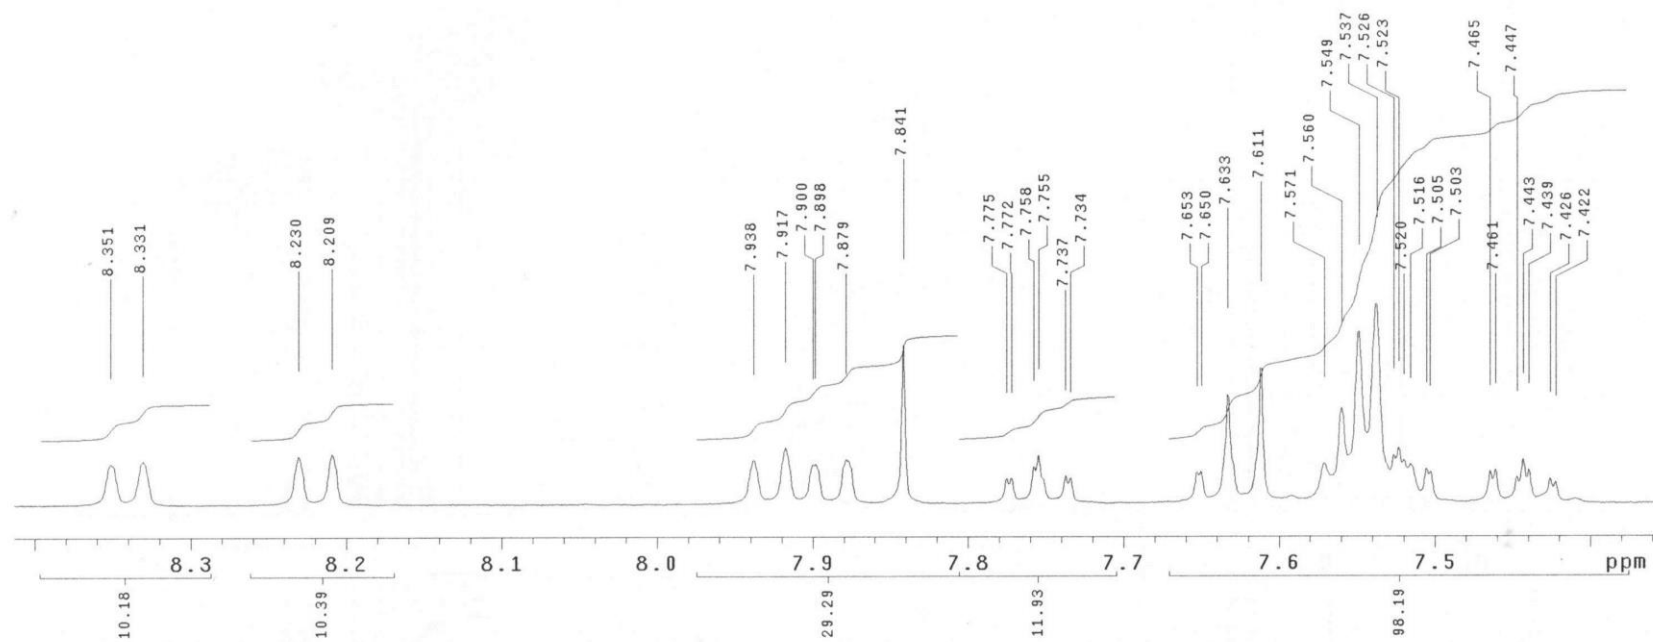

# Compound 5j (<sup>13</sup>C-NMR spectral data)

YTCF3AC20

Pulse Sequence: s2pu1

UNITYplus-400 "unity400"

Date: Jun 7 2018

Solvent: CDCl<sub>3</sub>

Ambient temperature

Total 7568 repetitions

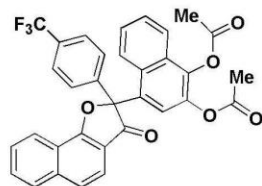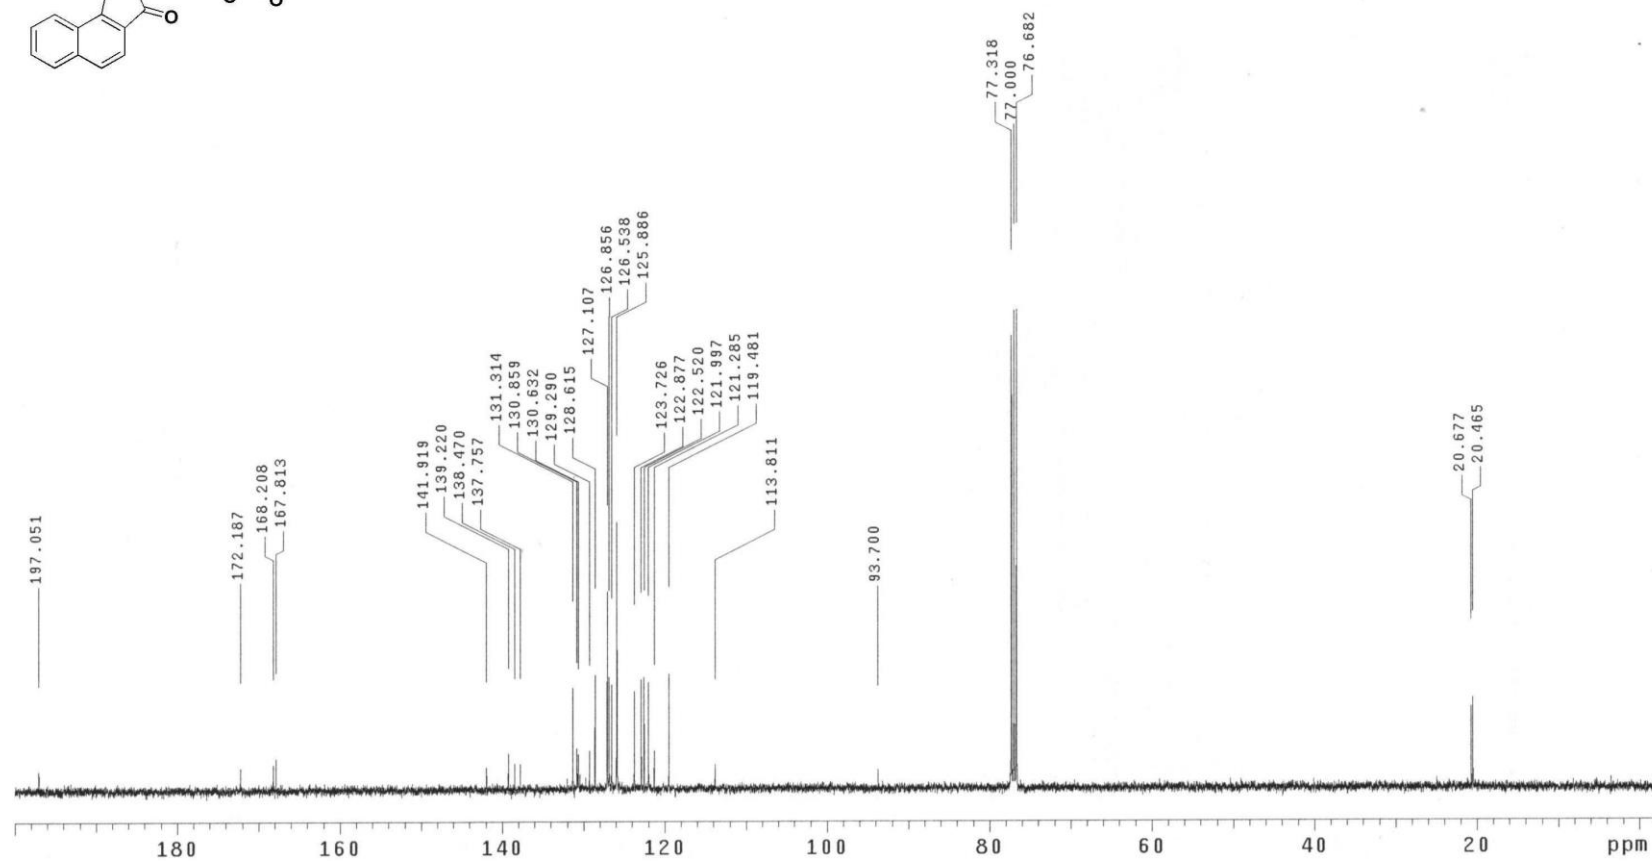

# Compound 5k (<sup>1</sup>H-NMR spectral data-1)

YTNAN

Pulse Sequence: s2pu1

UNITYplus-400 "unity400"

Date: Jun 27 2019

Solvent: CDCl<sub>3</sub>

Ambient temperature

Total 96 repetitions

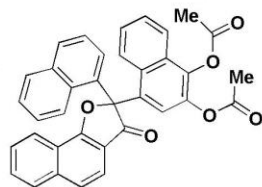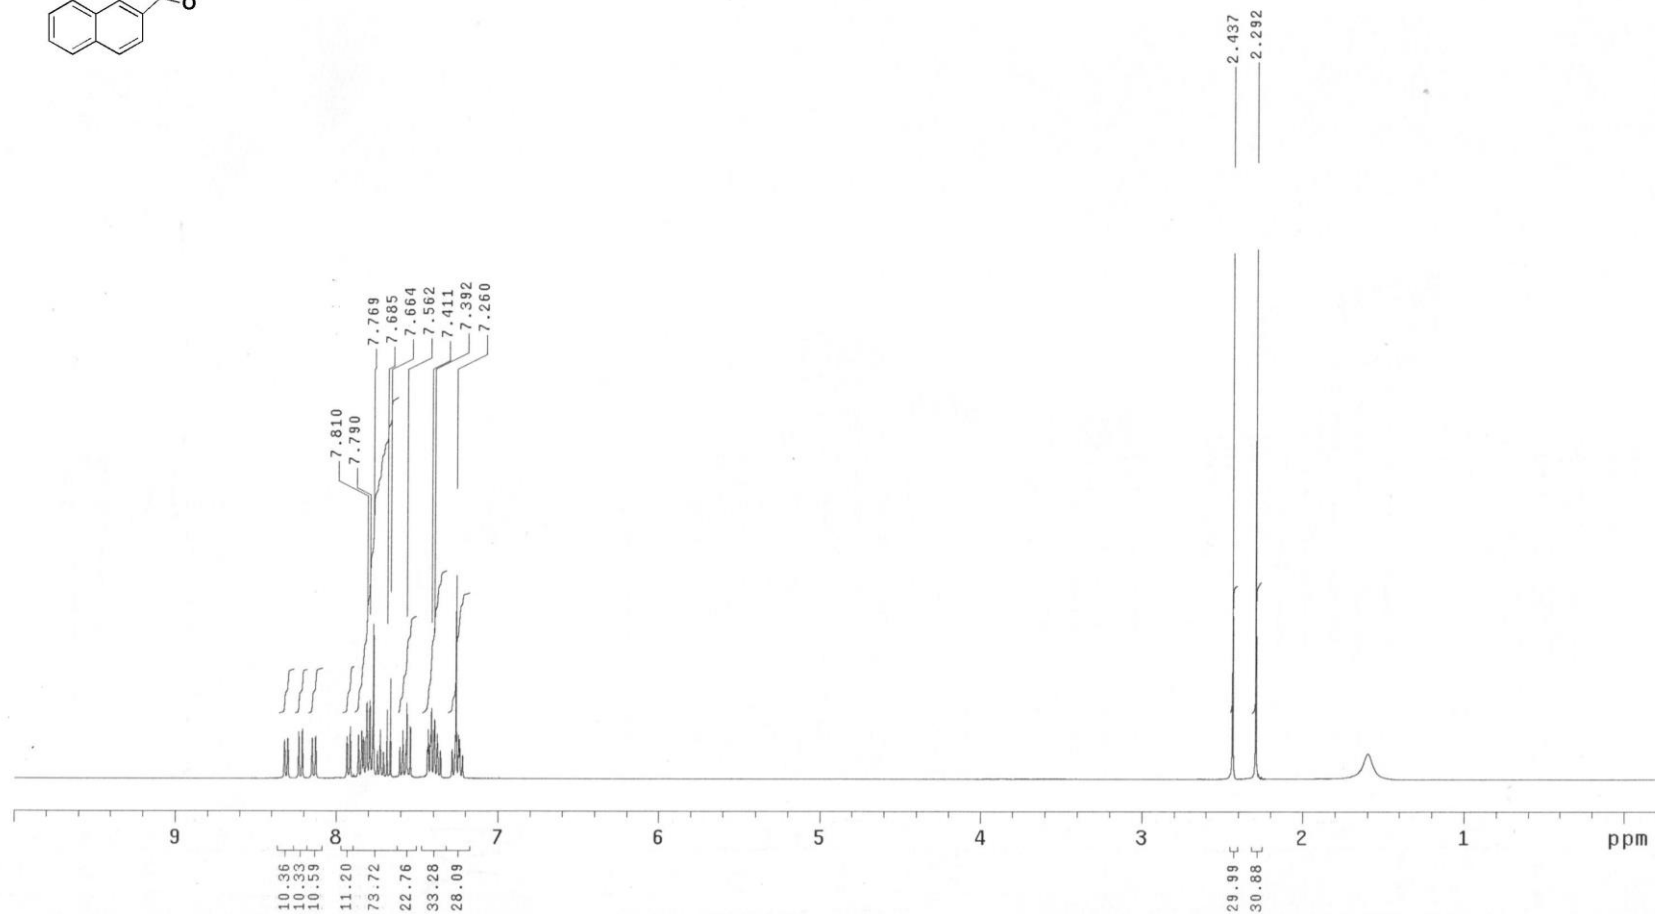

# Compound 5k (<sup>1</sup>H-NMR spectral data-2)

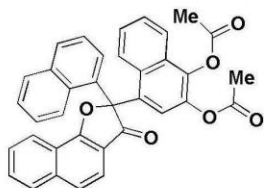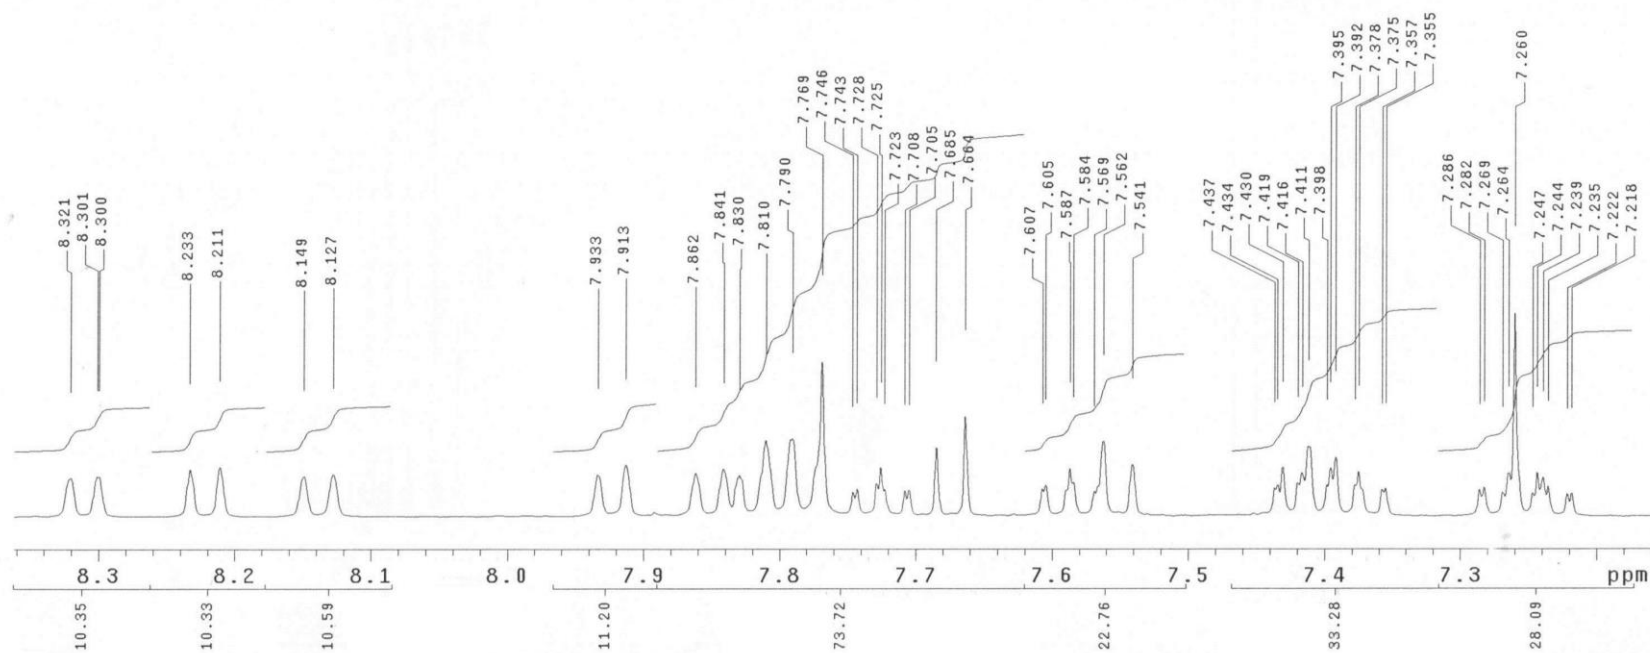



# Compound 5k (<sup>13</sup>C-NMR spectral data-1)

YTNAAc02

Pulse Sequence: s2pu1

UNITYplus-400 "unity400"

Date: Jun 1 2018

Solvent: CDCl<sub>3</sub>

Ambient temperature

Total 2160 repetitions

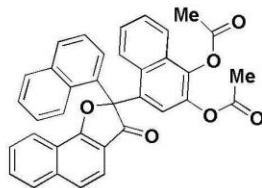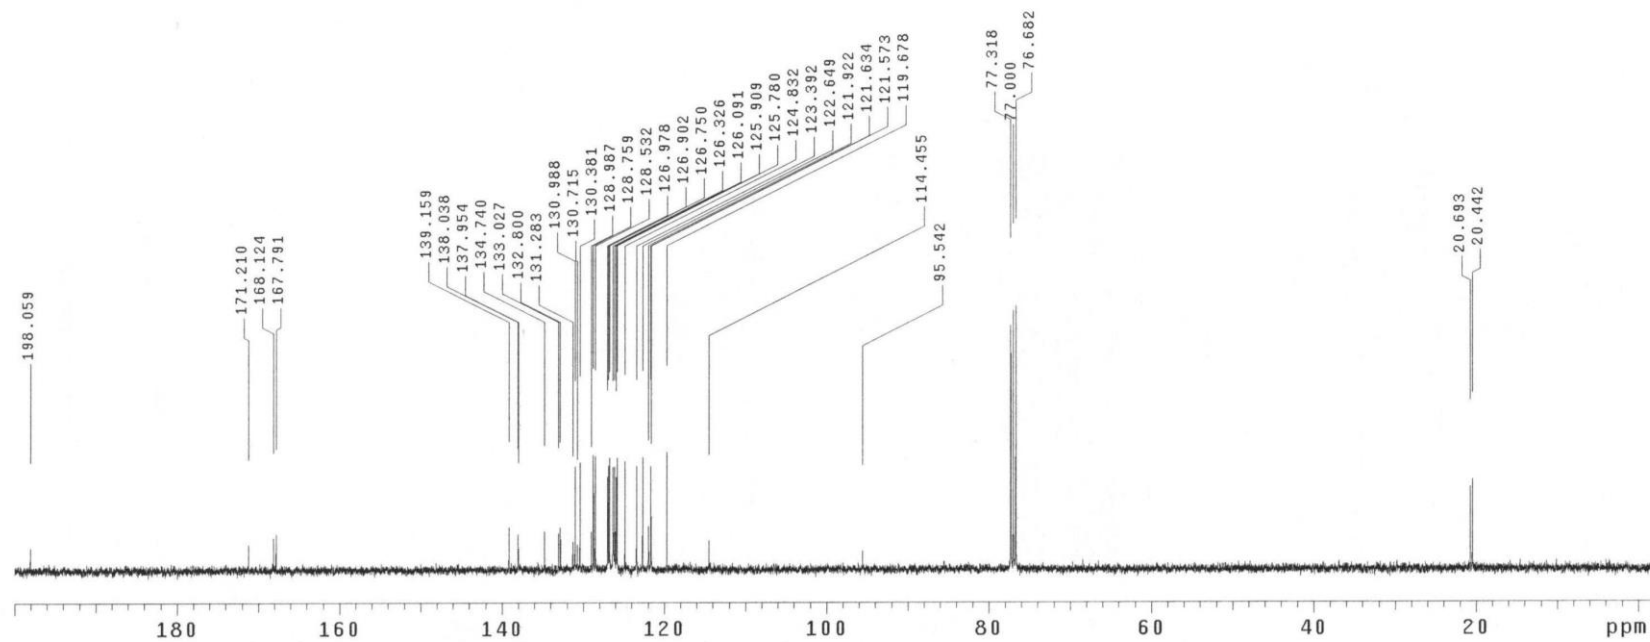

# Compound 5k ( $^{13}\text{C}$ -NMR spectral data-2)

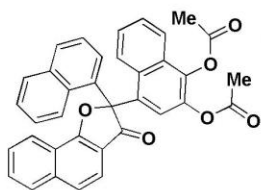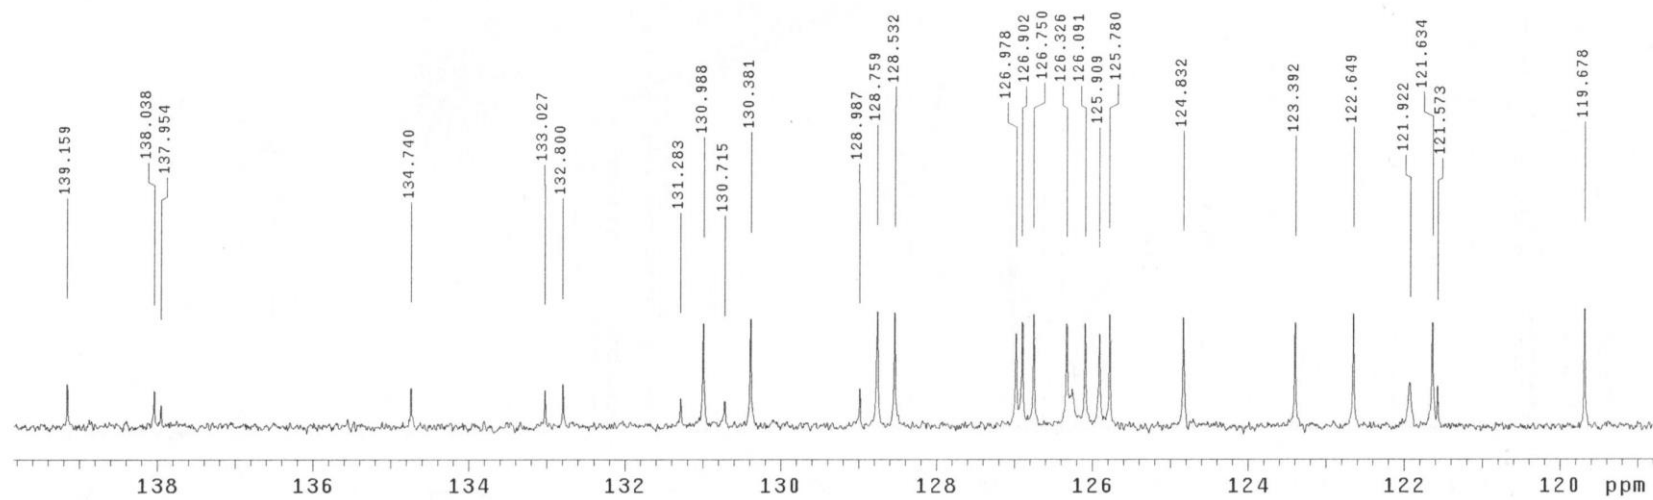

# Compound 5l (<sup>1</sup>H-NMR spectral data)

KTCF30AC

Pulse Sequence: s2pu1

UNITYplus-400 "unity400"

Date: Dec 3 2019

Solvent: CDCl<sub>3</sub>

Ambient temperature

Total 80 repetitions

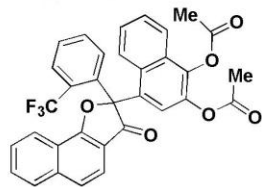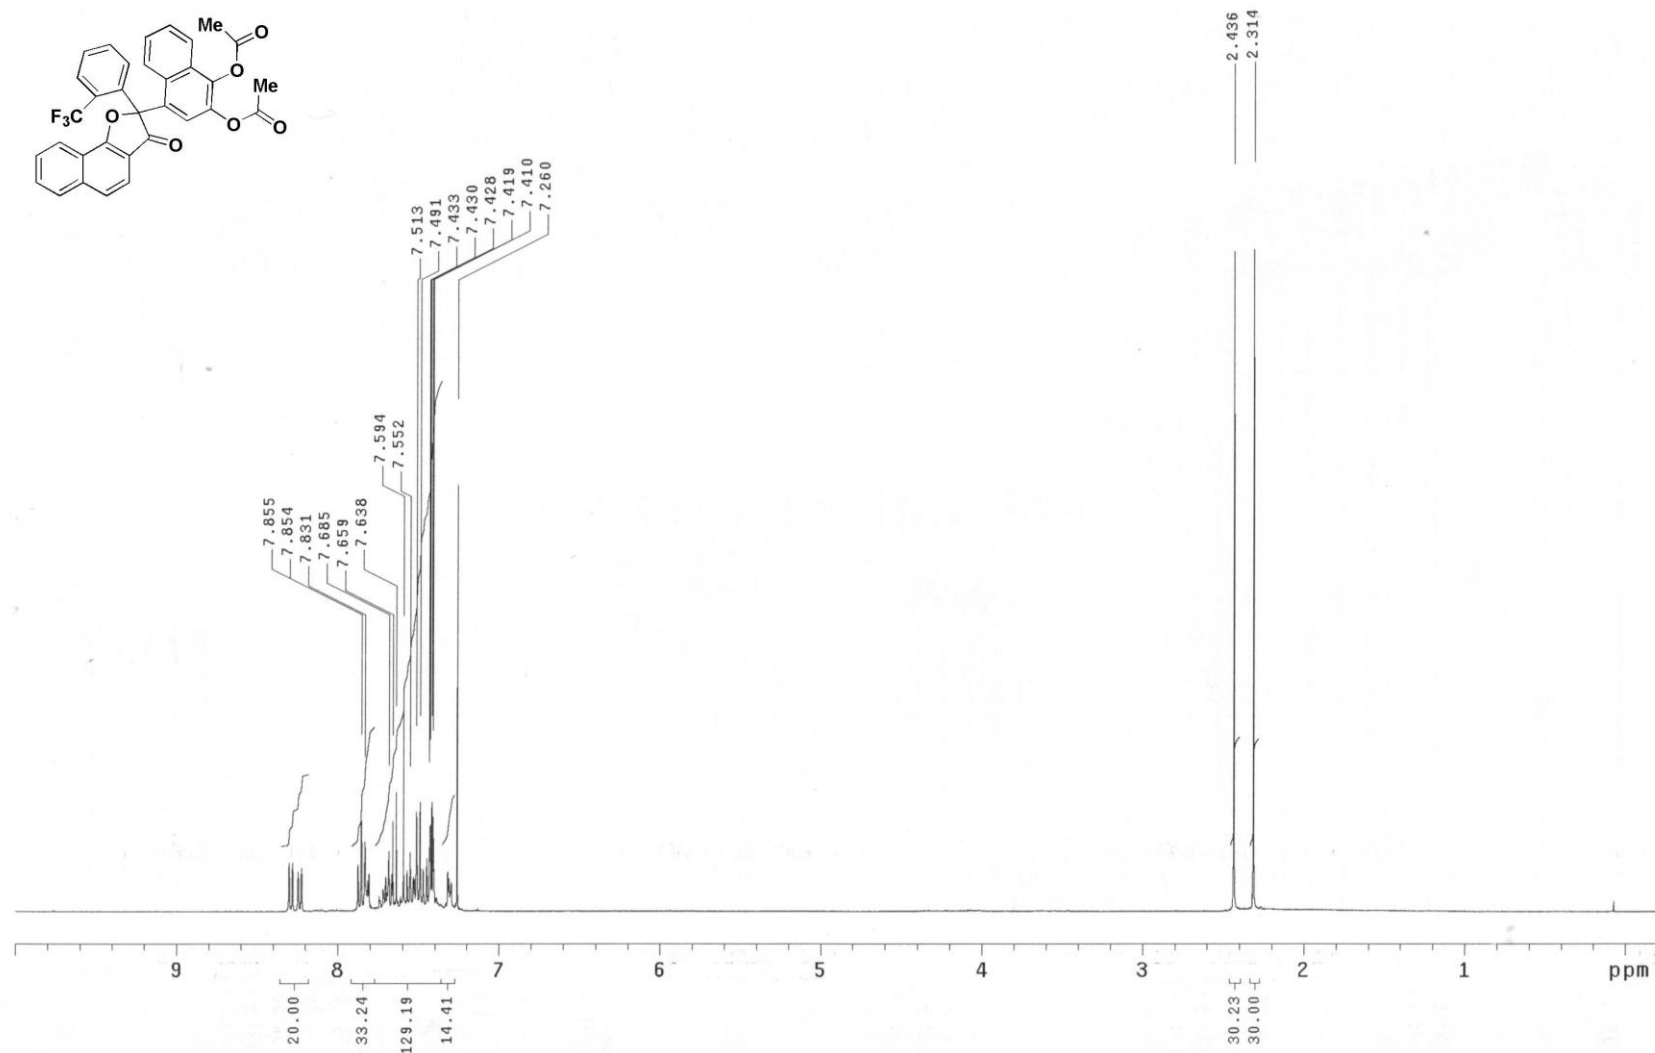

# Compound 5I ( $^{13}\text{C}$ -NMR spectral data)

KTCF30AC

Pulse Sequence: s2pu1

UNITYplus-400 "unity400"

Date: Dec 3 2019

Solvent:  $\text{CDCl}_3$

Ambient temperature

Total 27360 repetitions

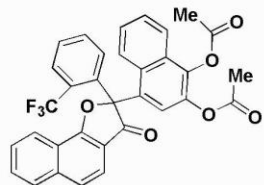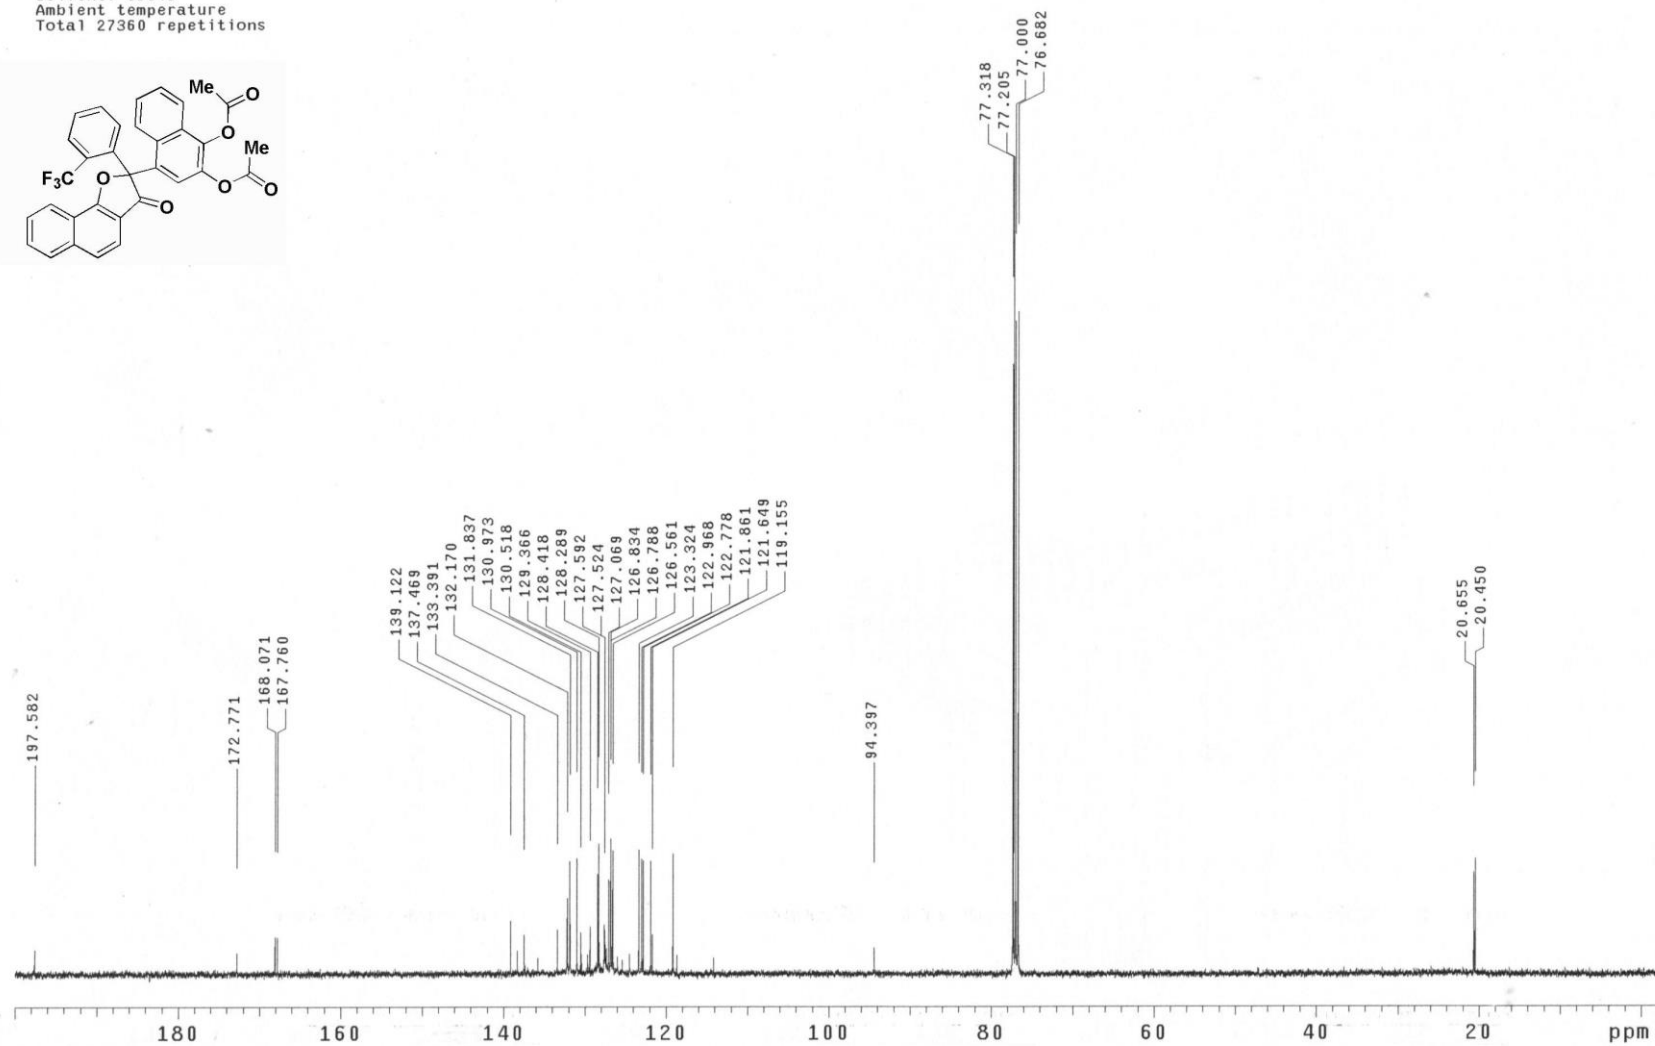

# Compound 6m (<sup>1</sup>H-NMR spectral data-1)

YT2Me0Ac20

Pulse Sequence: s2pu1

UNITYplus-400 "unity400"

Date: Jul 25 2018

Solvent: CDCl<sub>3</sub>

Ambient temperature

Total 160 repetitions

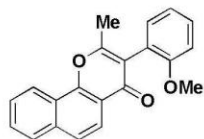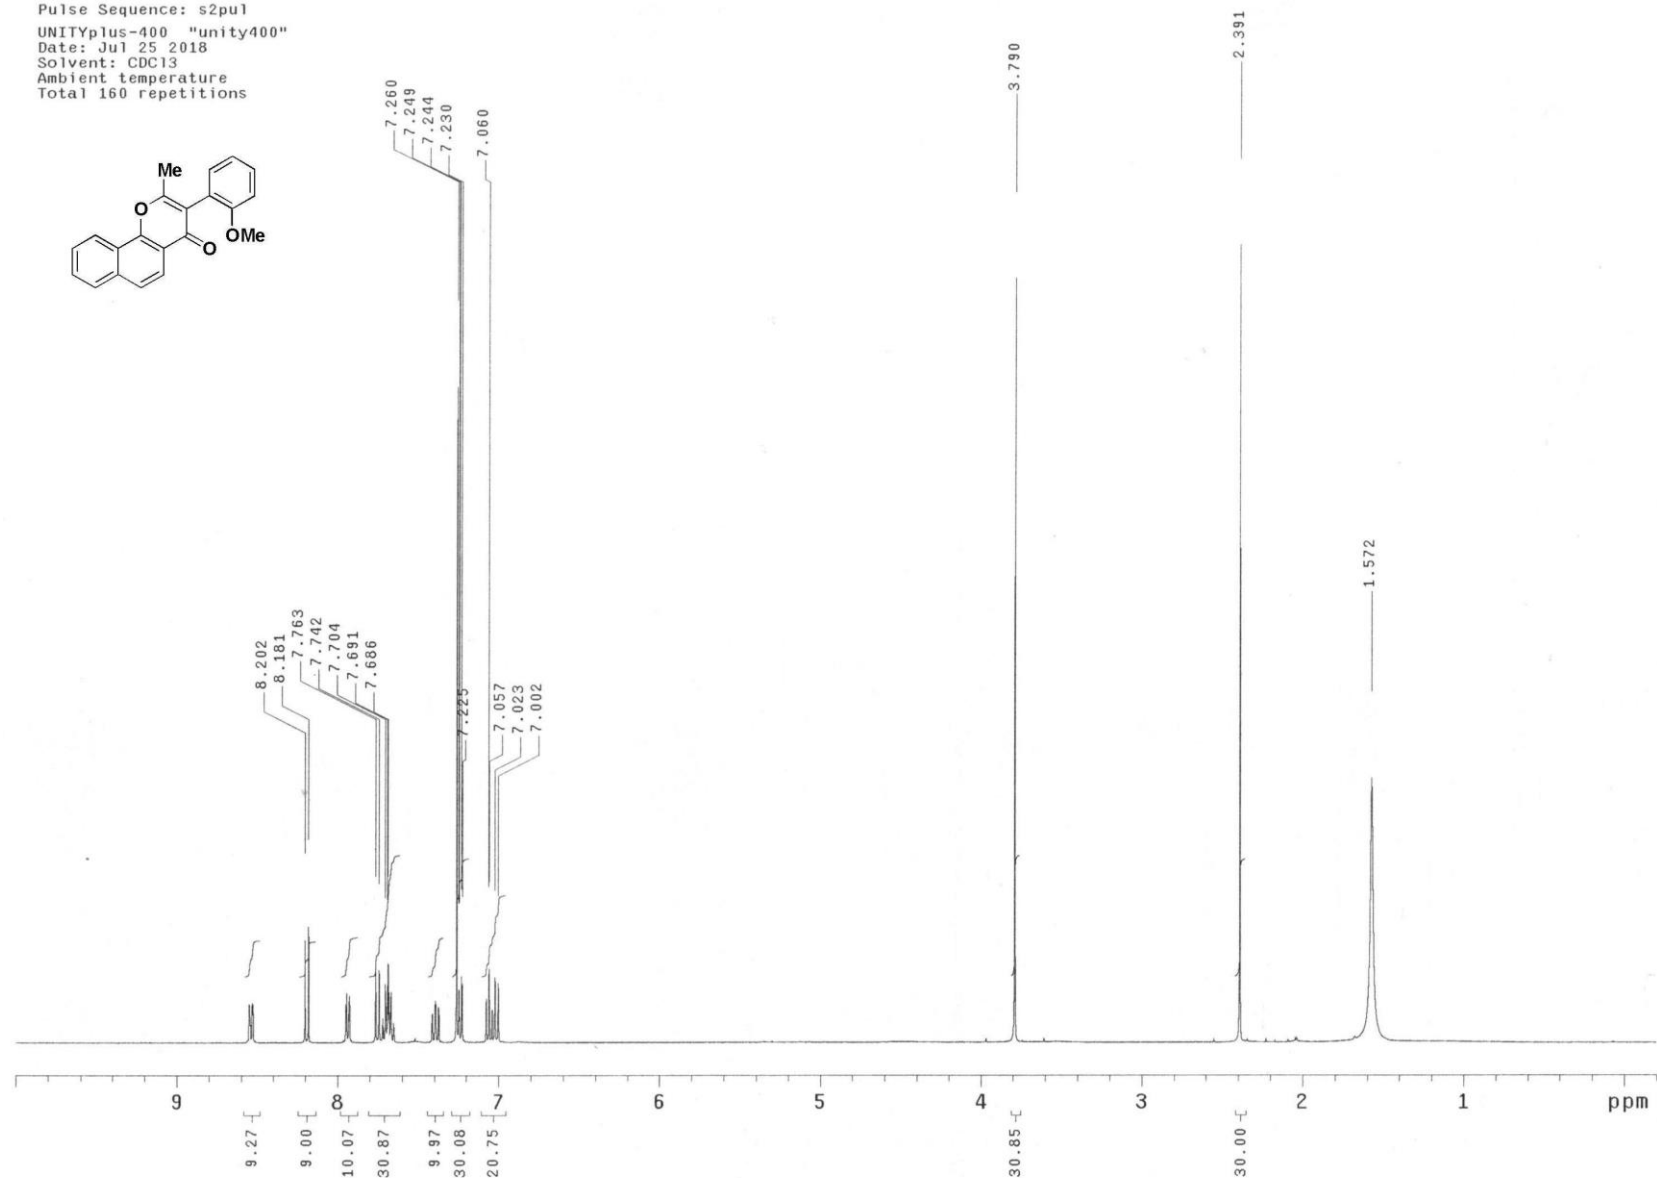

# Compound 6m (<sup>1</sup>H-NMR spectral data-2)

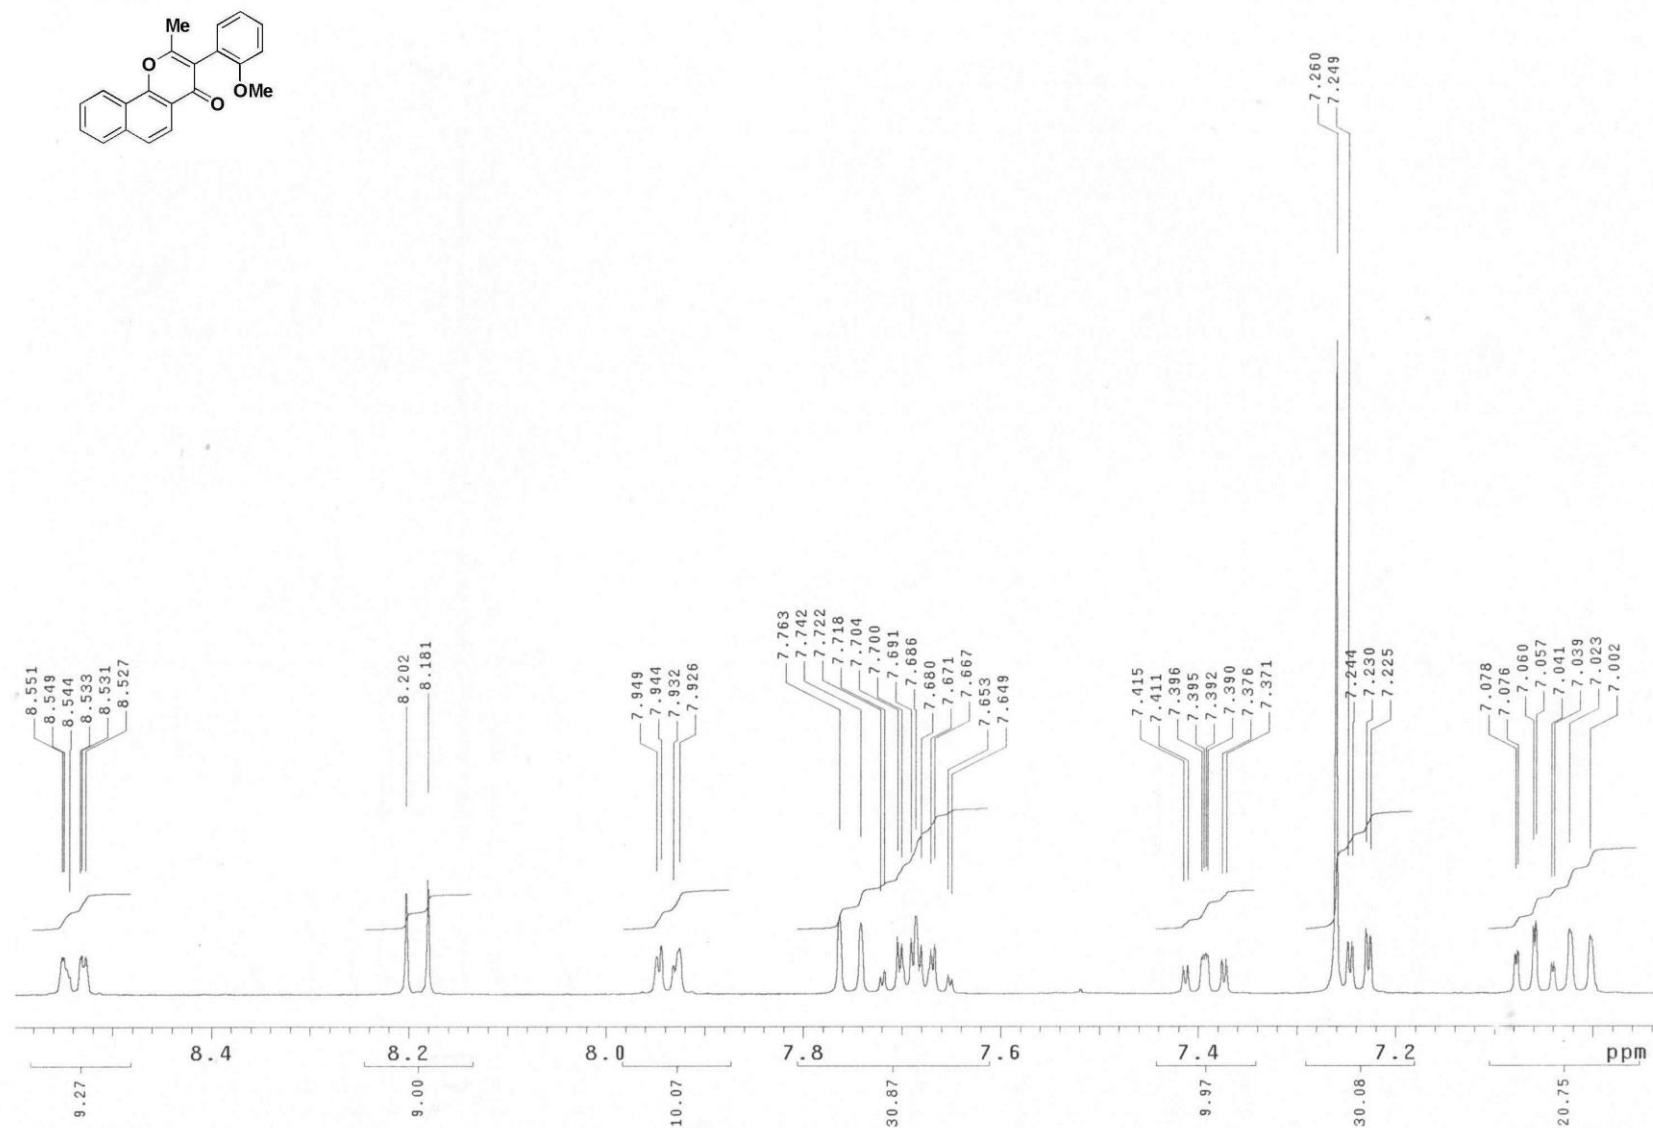

# Compound 6m (<sup>13</sup>C-NMR spectral data-1)

YT2Me0Ac20

Pulse Sequence: s2pu1

UNITYplus-400 "unity400"

Date: Jul 25 2018

Solvent: CDCl<sub>3</sub>

Ambient temperature

Total 27136 repetitions

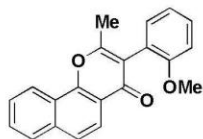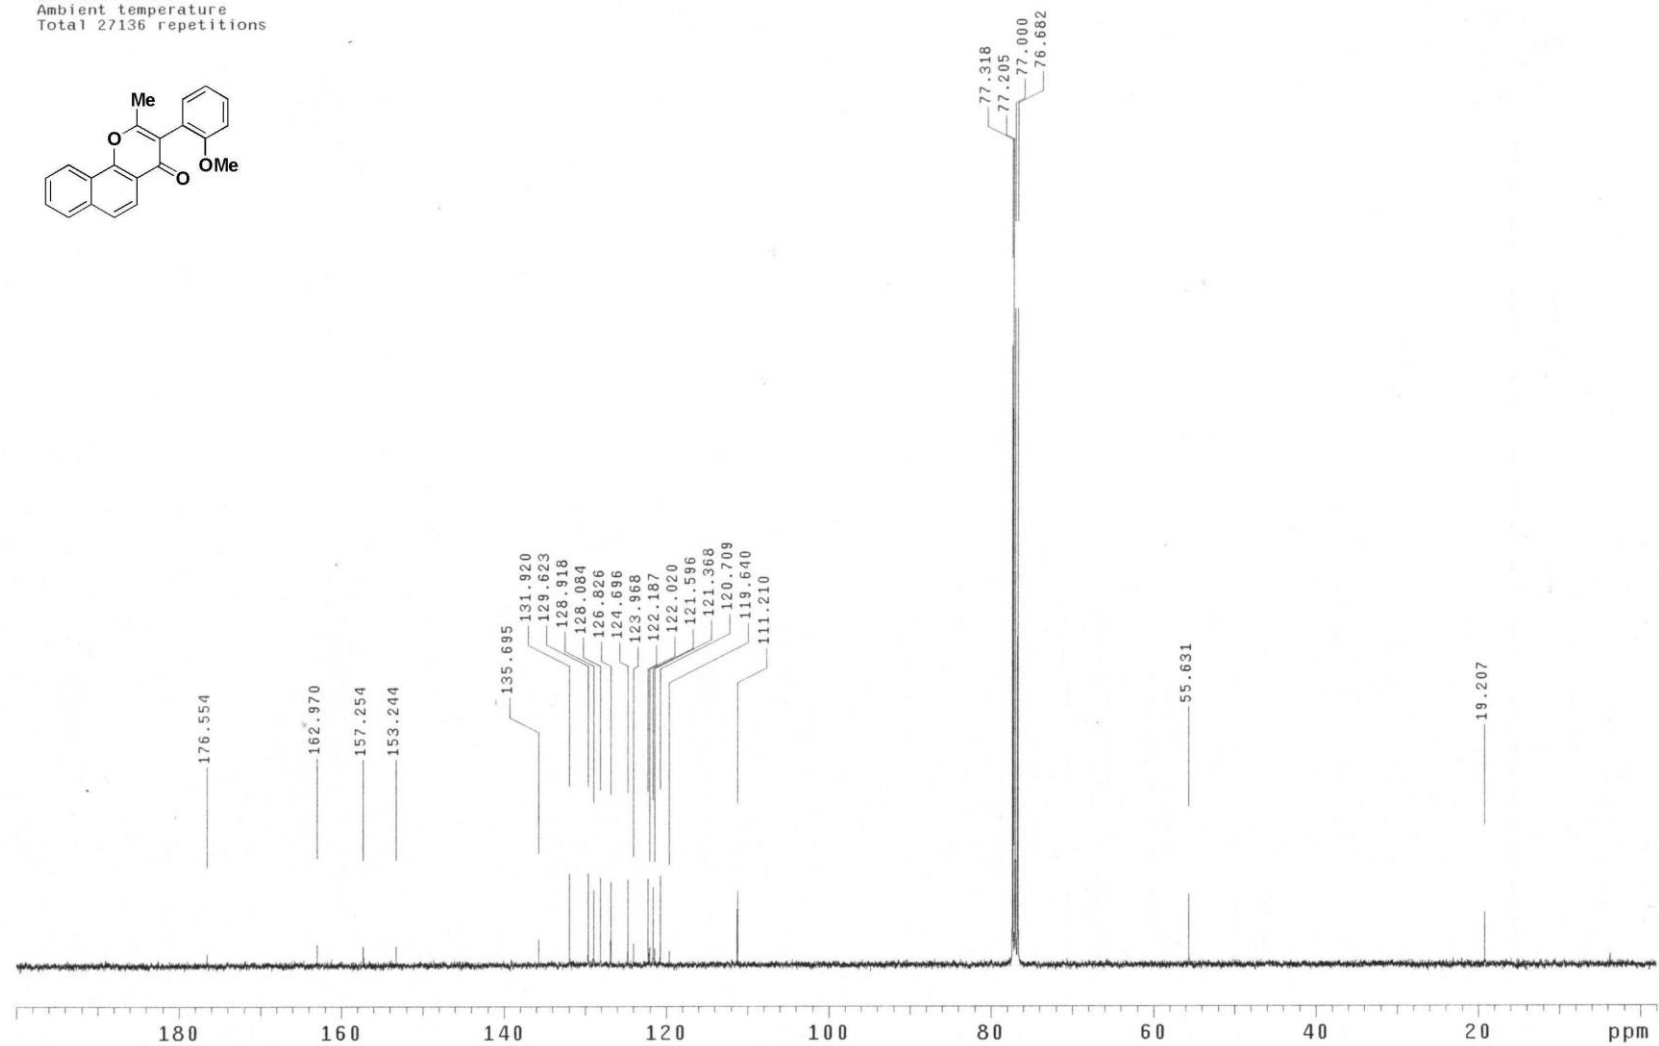

# Compound 6m (<sup>13</sup>C-NMR spectral data-2)

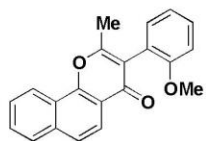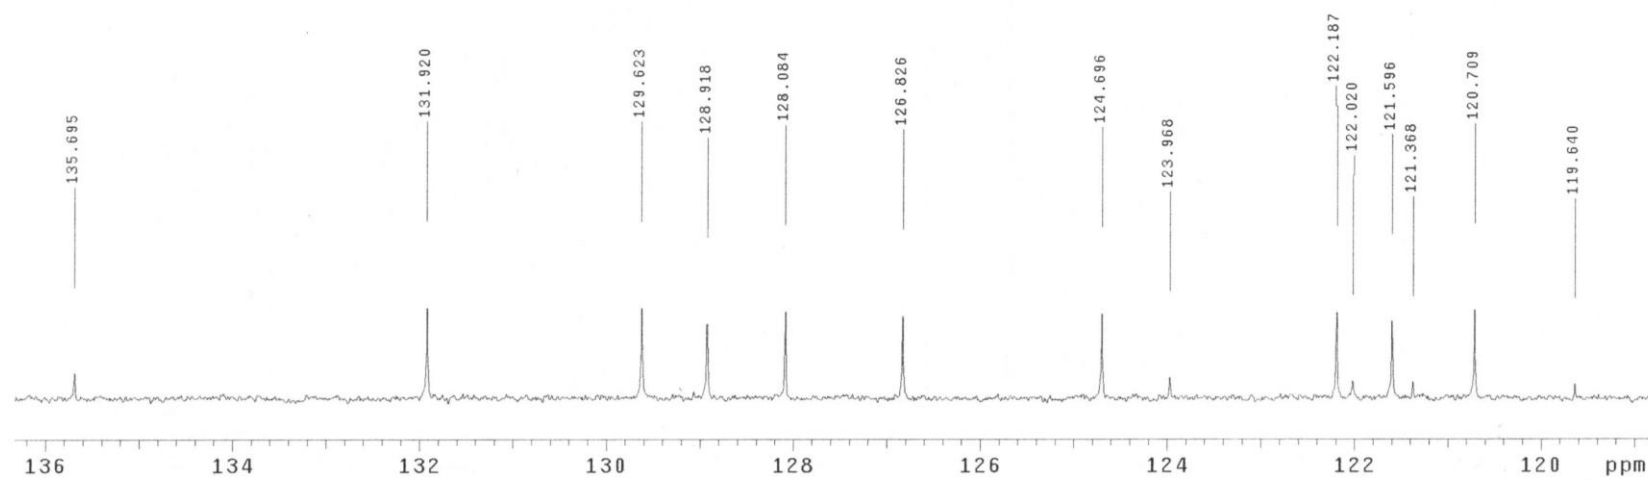



# Compound 6n (<sup>1</sup>H-NMR spectral data-1)

YT150Me

Pulse Sequence: s2pu1  
Mercury-400BB "MerPlus400"  
Date: Jun 28 2018  
Solvent: cdcl3  
Ambient temperature  
Total 32 repetitions

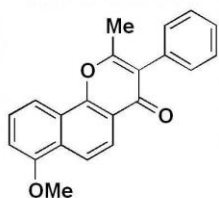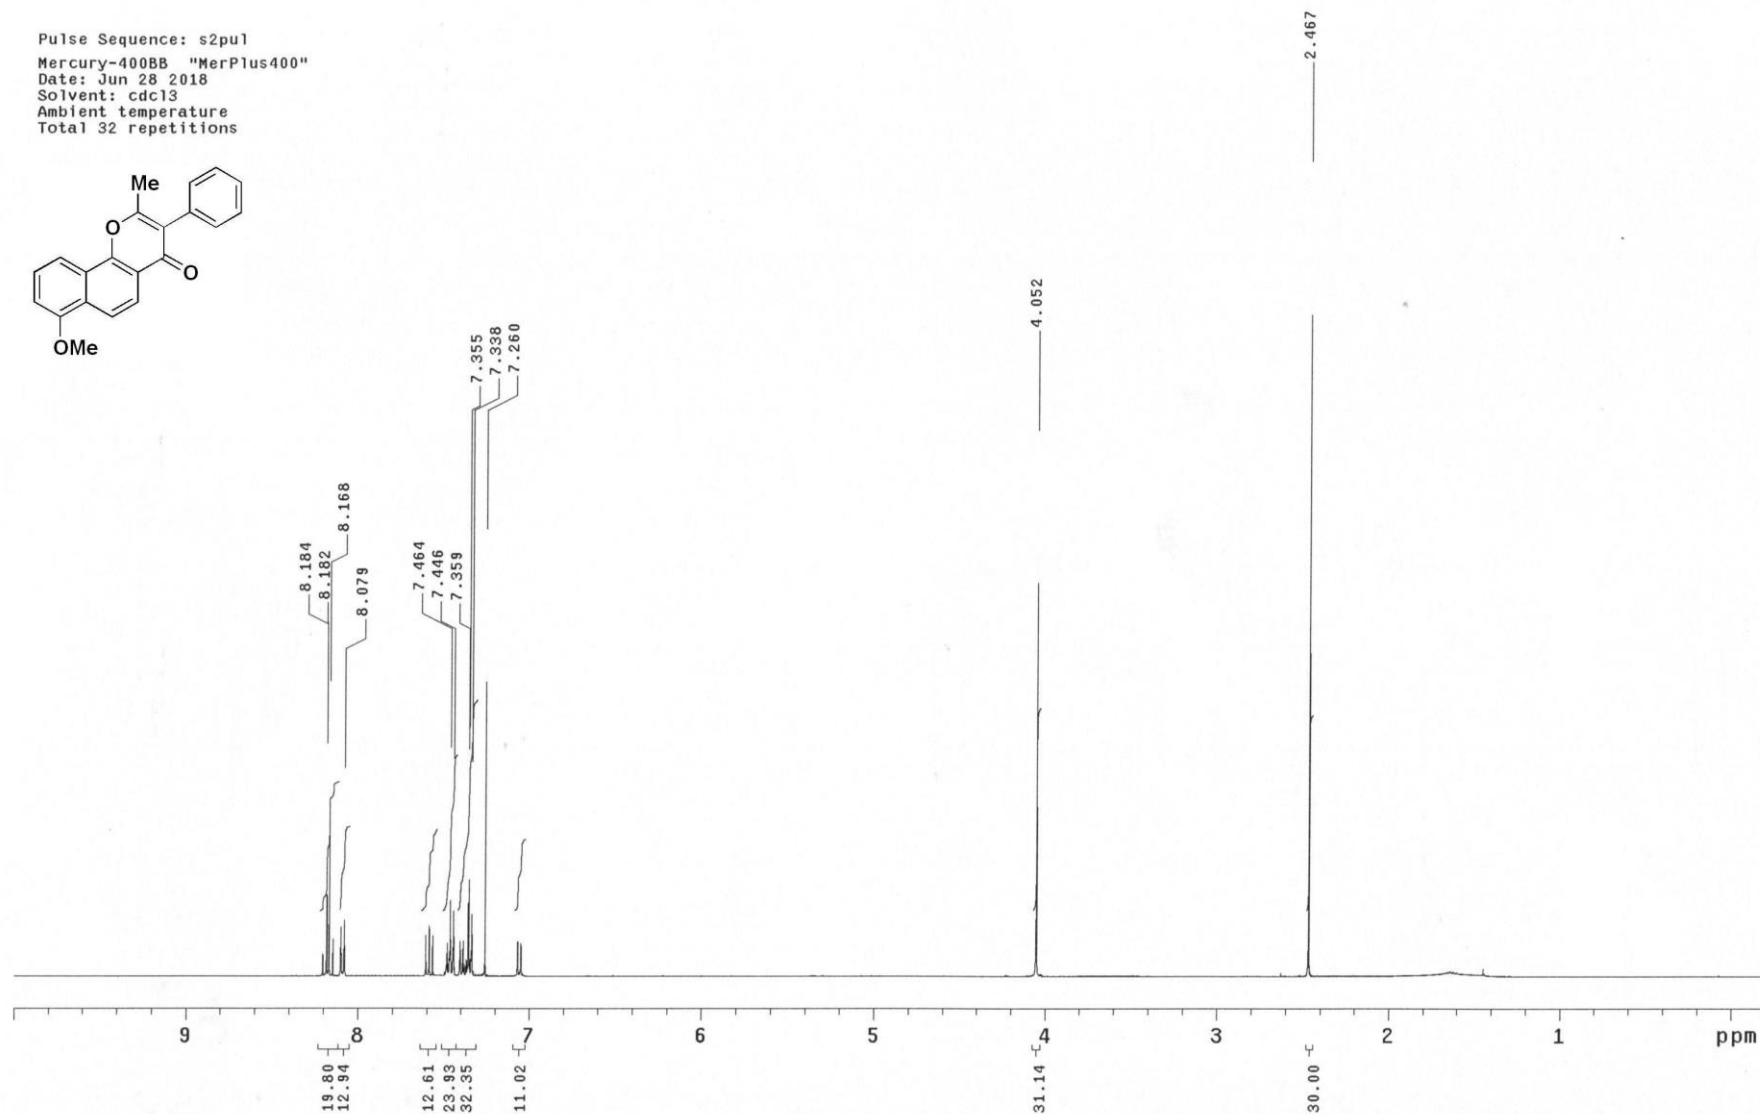

# Compound 6n (<sup>1</sup>H-NMR spectral data-2)

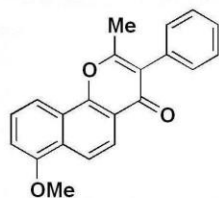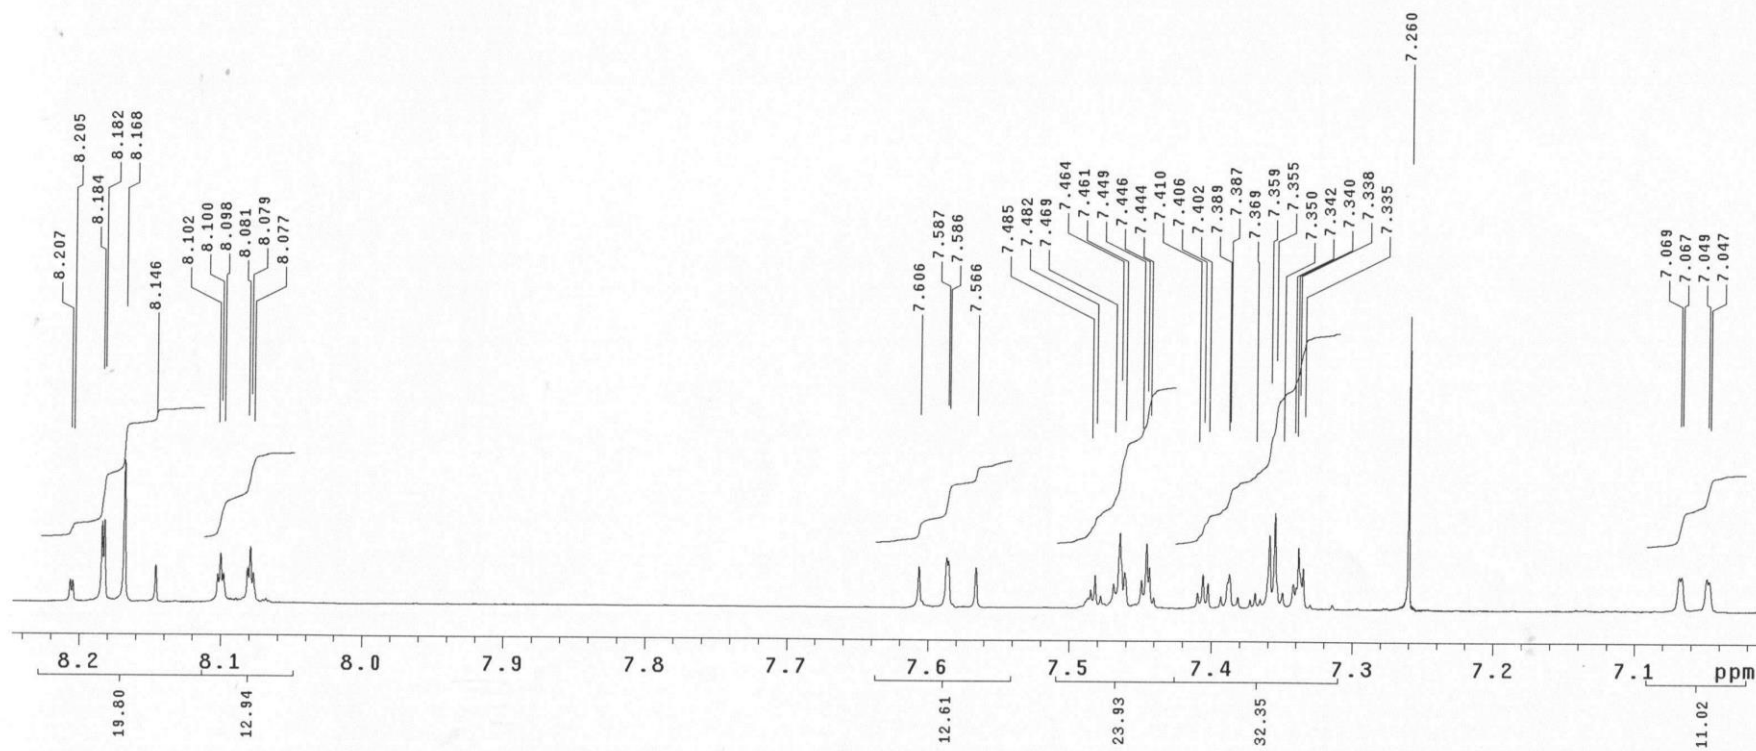

# Compound 6n (<sup>13</sup>C-NMR spectral data)

YT150Me

Pulse Sequence: s2pu1  
Mercury-400BB "MerPlus400"  
Date: Jun 28 2018  
Solvent: cdcl3  
Ambient temperature  
Total 3088 repetitions

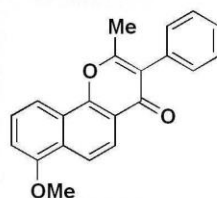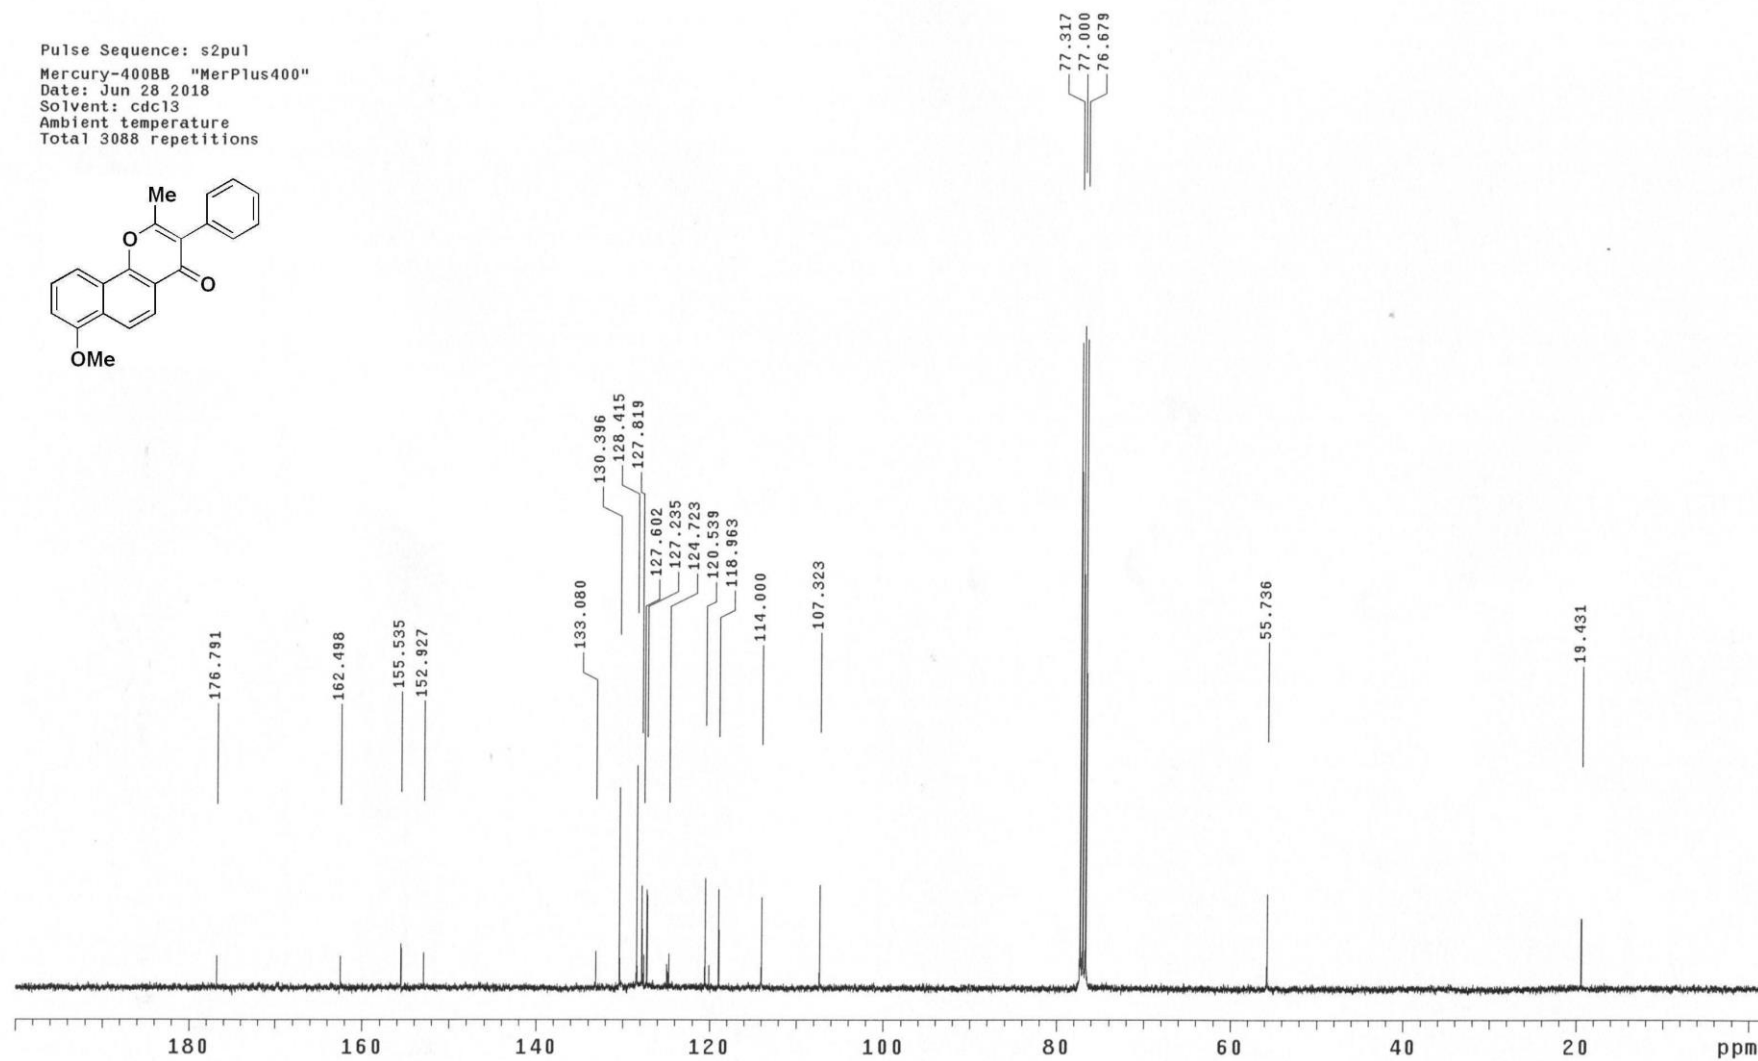

# Compound 6o (<sup>1</sup>H-NMR spectral data-1)

YT4-OMeAC20

Pulse Sequence: s2pul

UNITYplus-400 "unity400"

Date: Sep 13 2018

Solvent: CDCl<sub>3</sub>

Ambient temperature

Total 80 repetitions

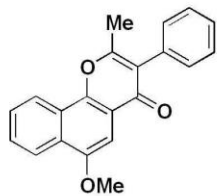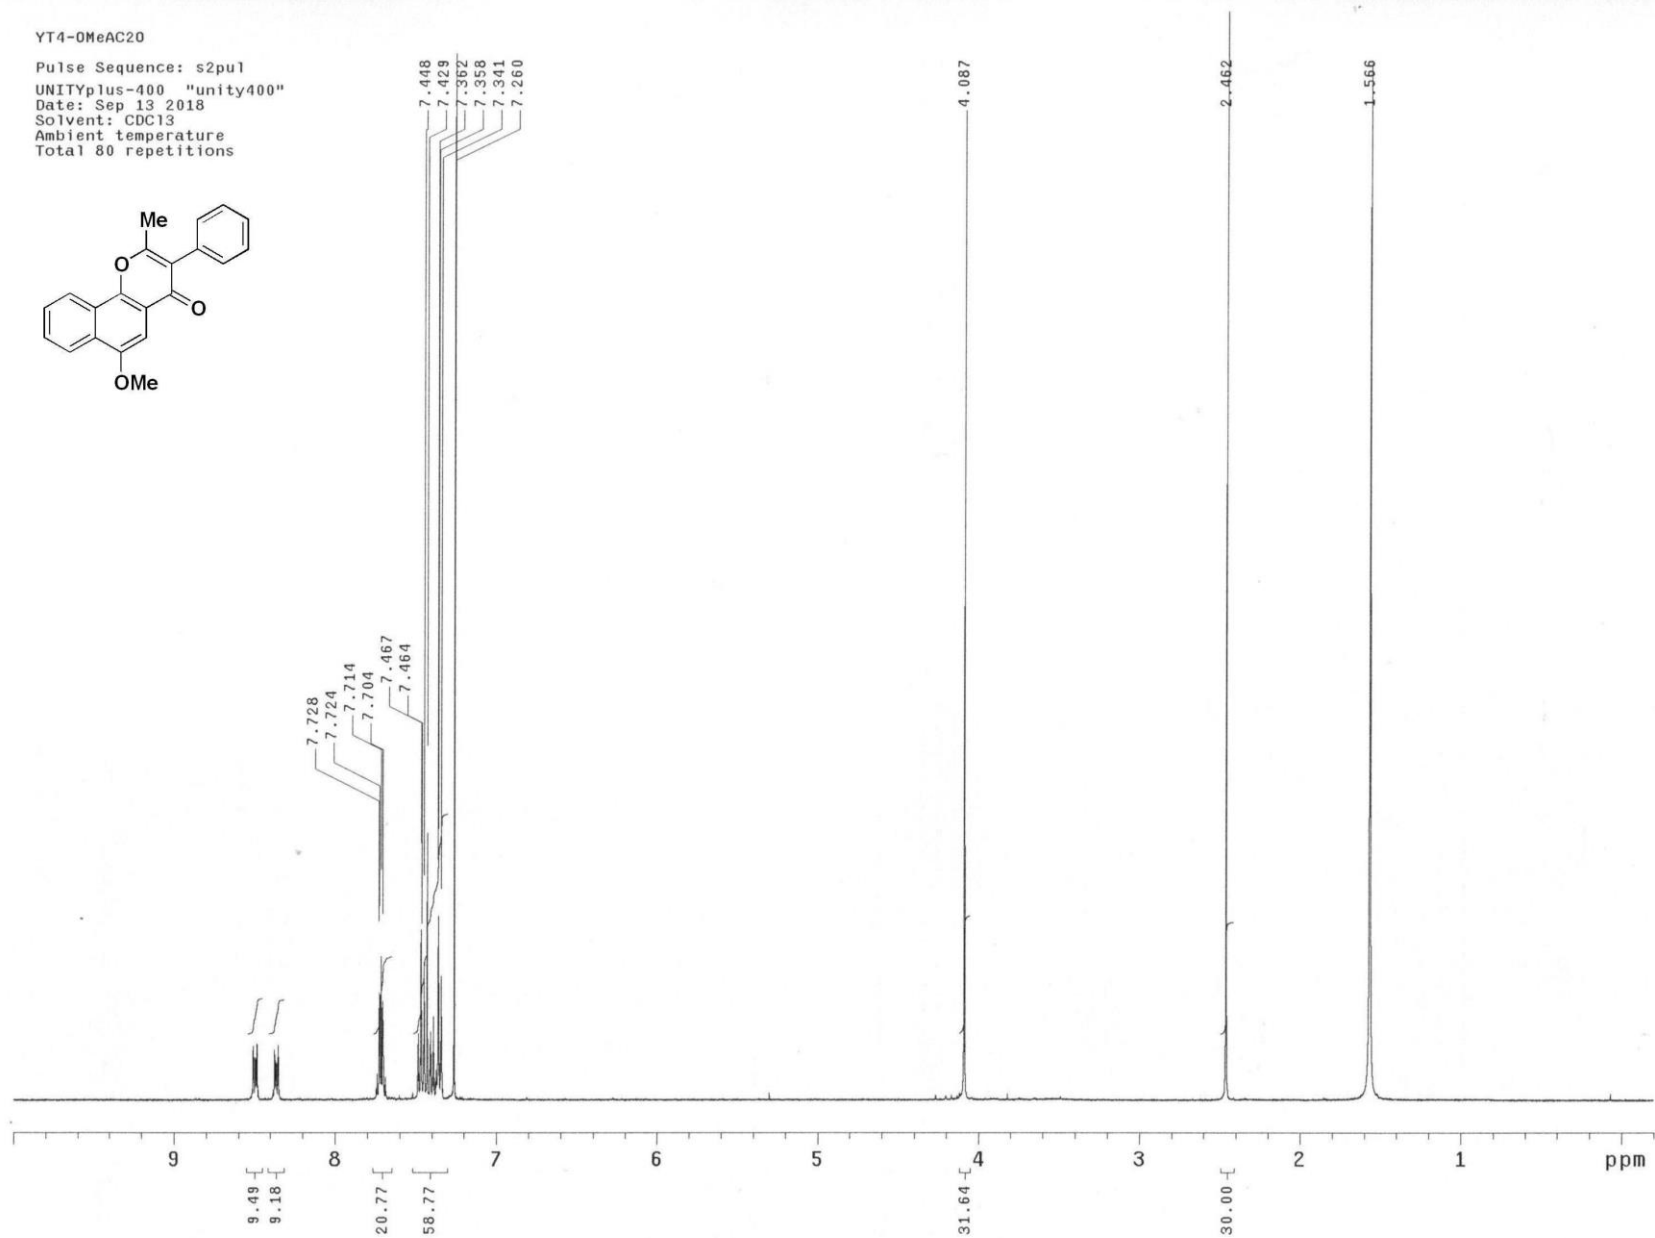

# Compound 6o (<sup>1</sup>H-NMR spectral data-2)

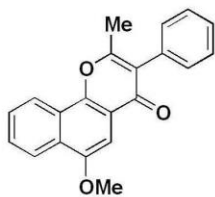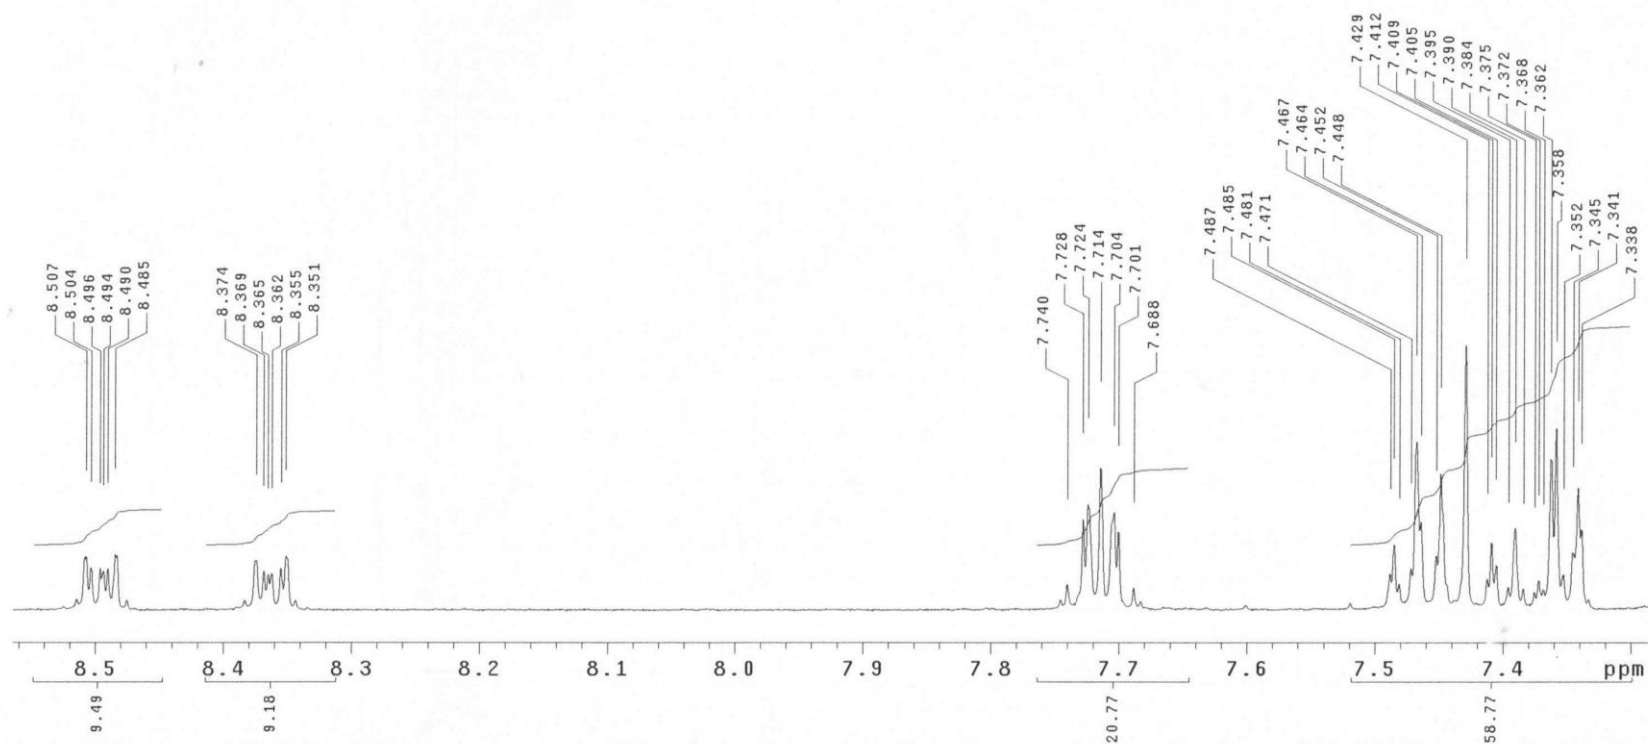

# Compound 6o (<sup>13</sup>C-NMR spectral data)

YT4-OMeAC20

Pulse Sequence: s2pu1

UNITYplus-400 "unity400"

Date: Sep 13 2018

Solvent: CDCl<sub>3</sub>

Ambient temperature

Total 30496 repetitions

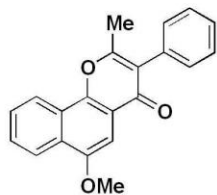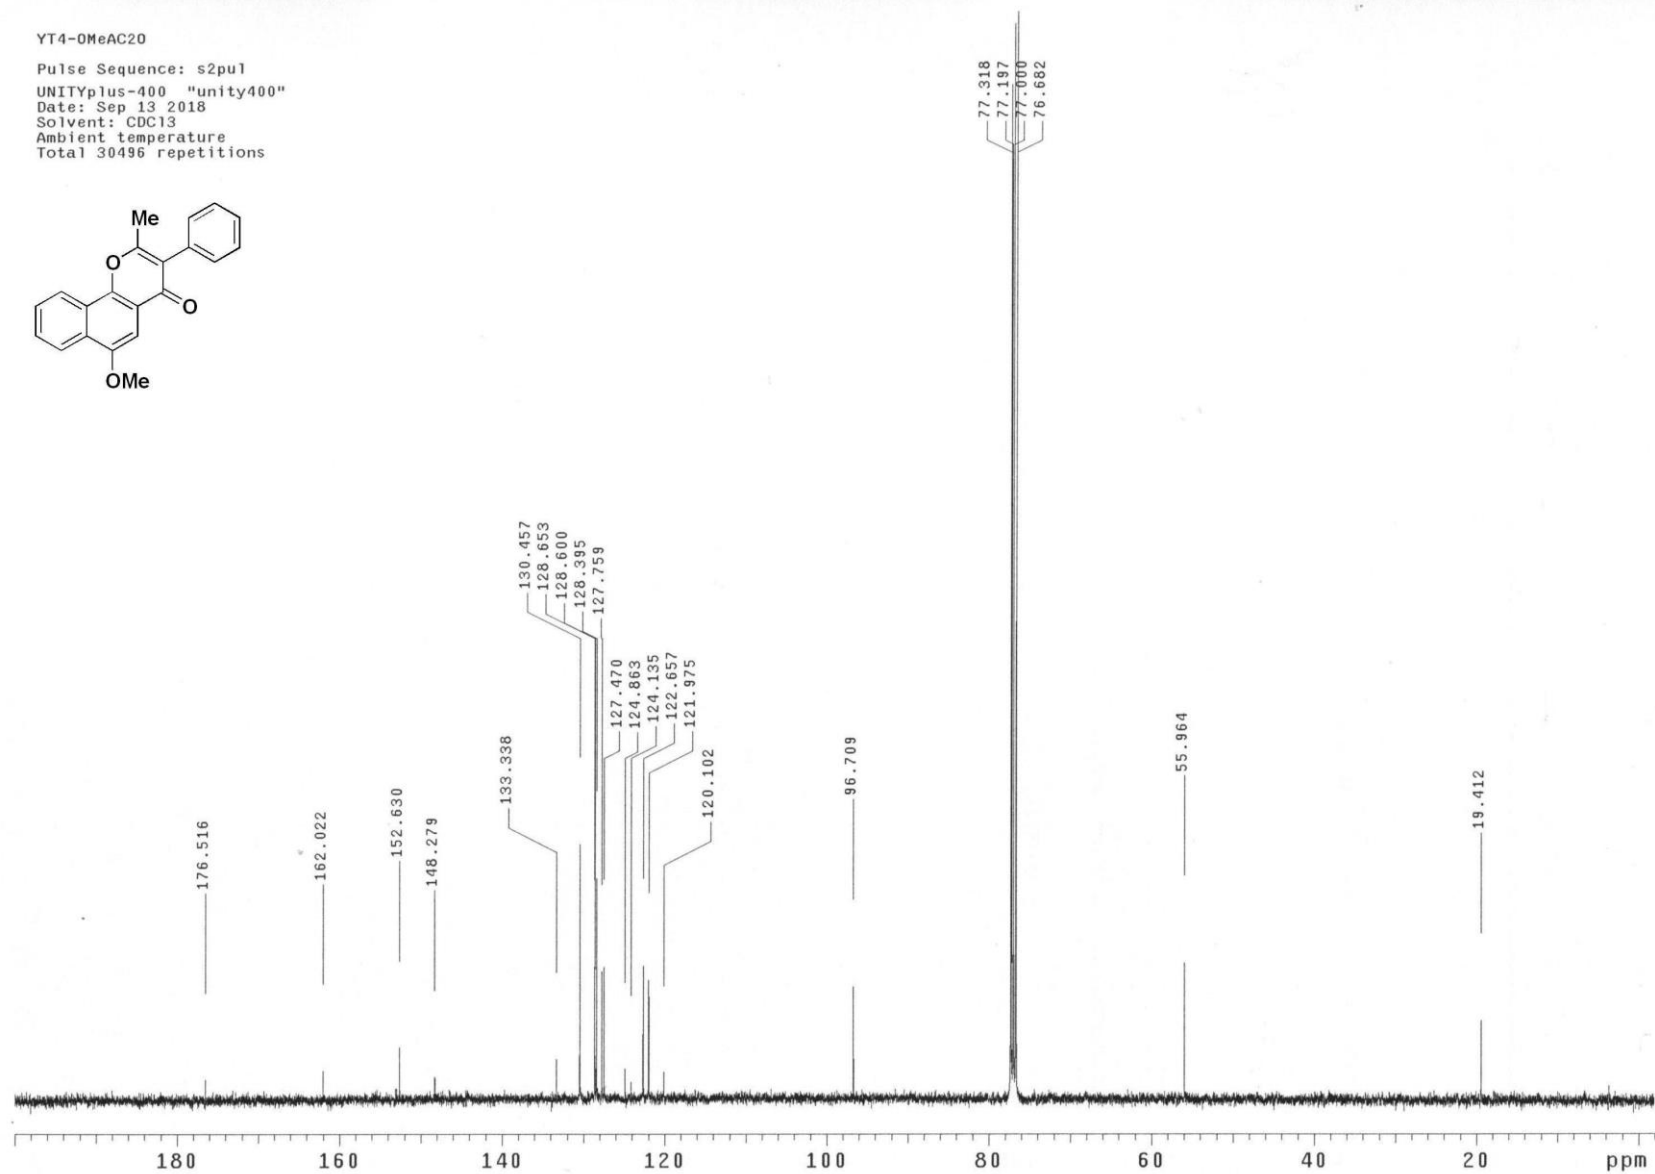

# Compound 6p (<sup>1</sup>H-NMR spectral data-1)

YT4-C1AC20

Pulse Sequence: s2pu1  
UNITYplus-400 "unity400"  
Date: Aug 8 2018  
Solvent: CDCl<sub>3</sub>  
Ambient temperature  
Total 32 Repetitions

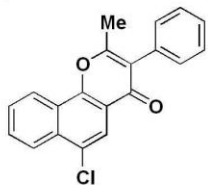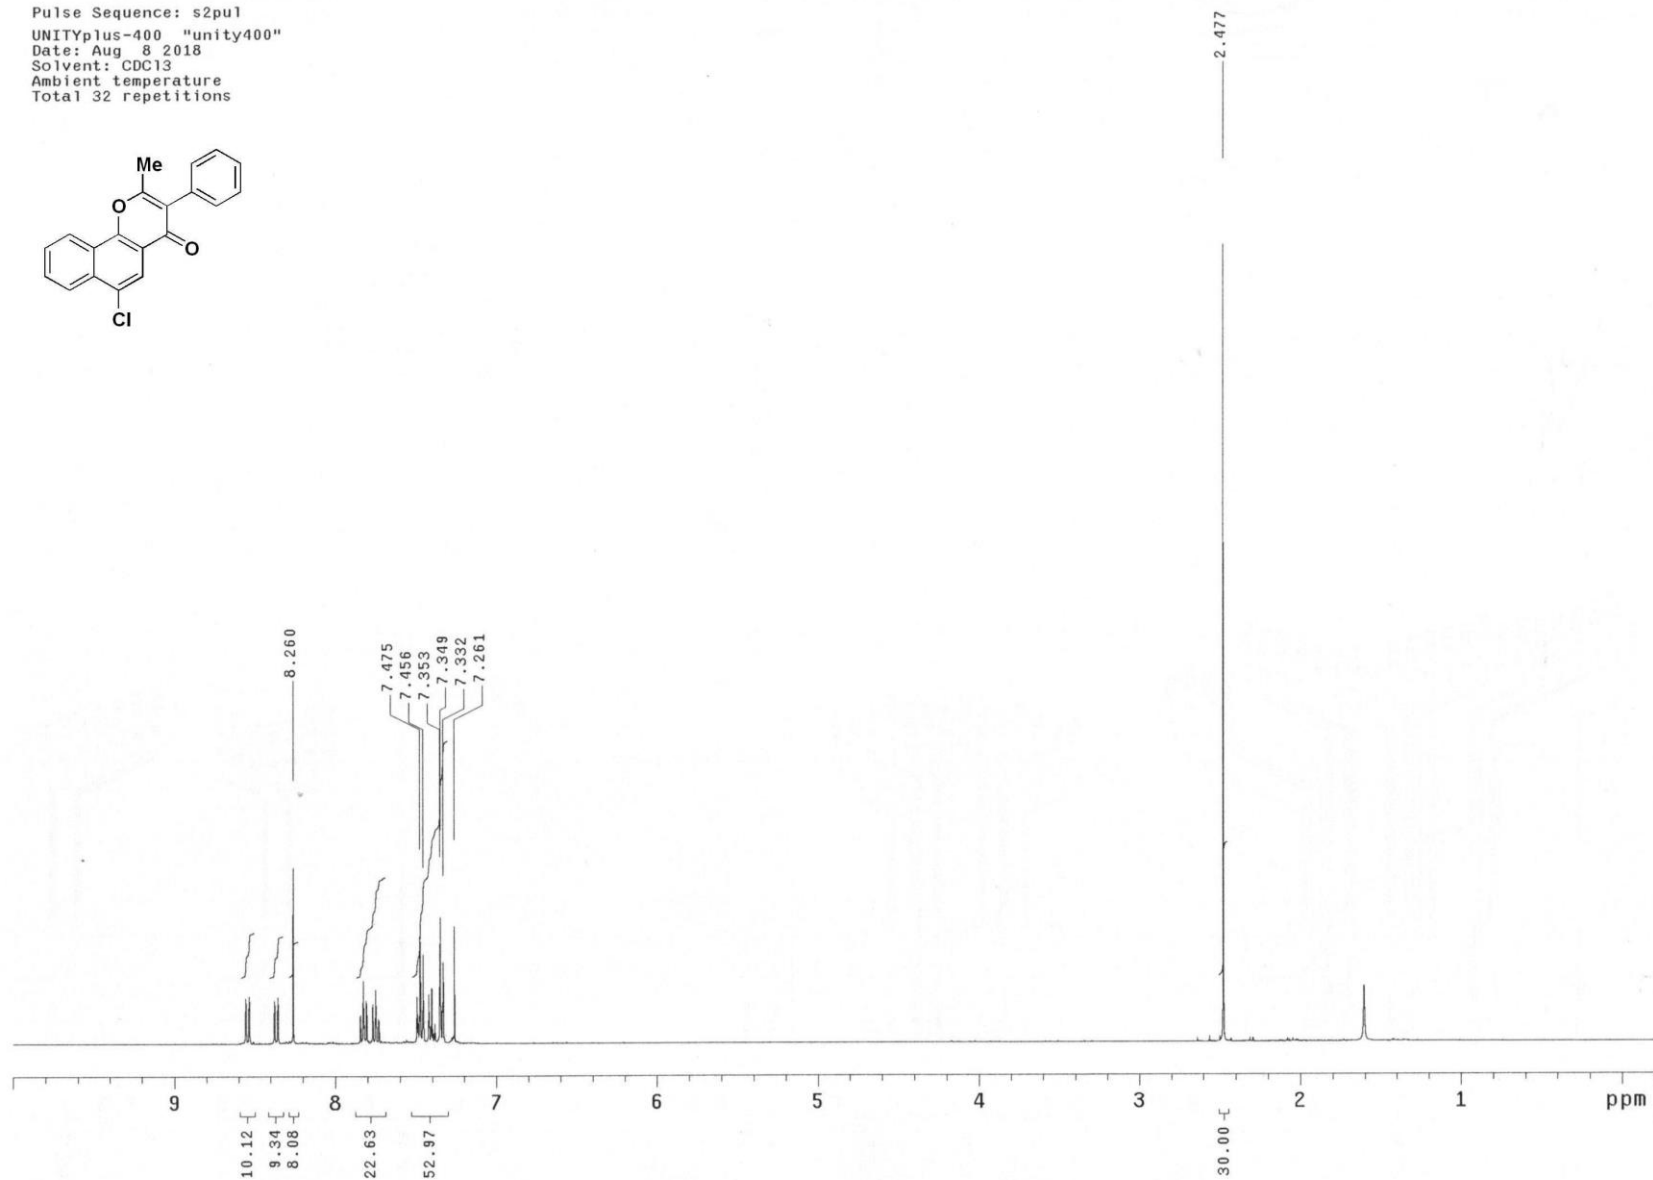

# Compound 6p (<sup>1</sup>H-NMR spectral data-2)

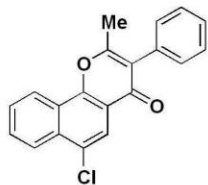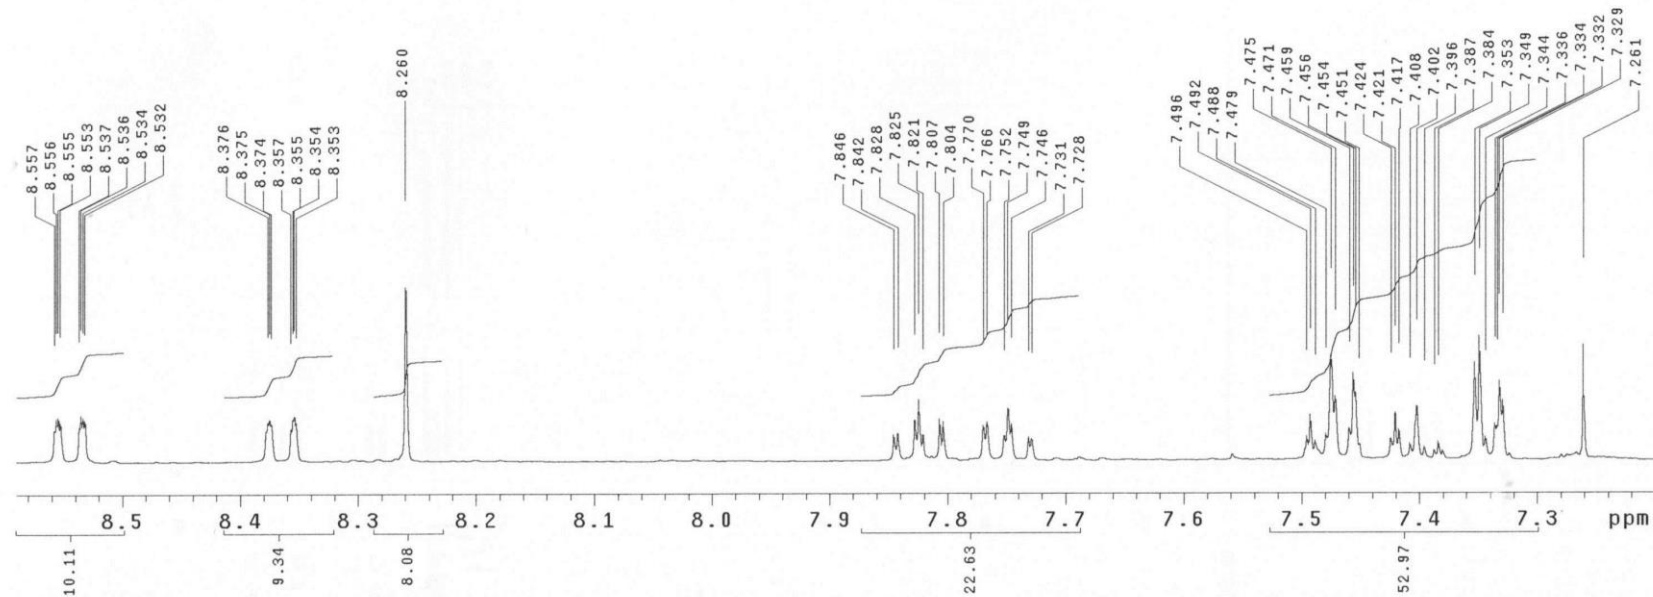



# Compound 6p ( $^{13}\text{C}$ -NMR spectral data)

YT4-C1AC20

Pulse Sequence: s2pu1

UNITYplus-400 "unity400"

Date: Aug 8 2018

Solvent:  $\text{CDCl}_3$

Ambient temperature

Total 1104 repetitions

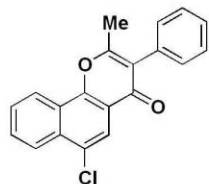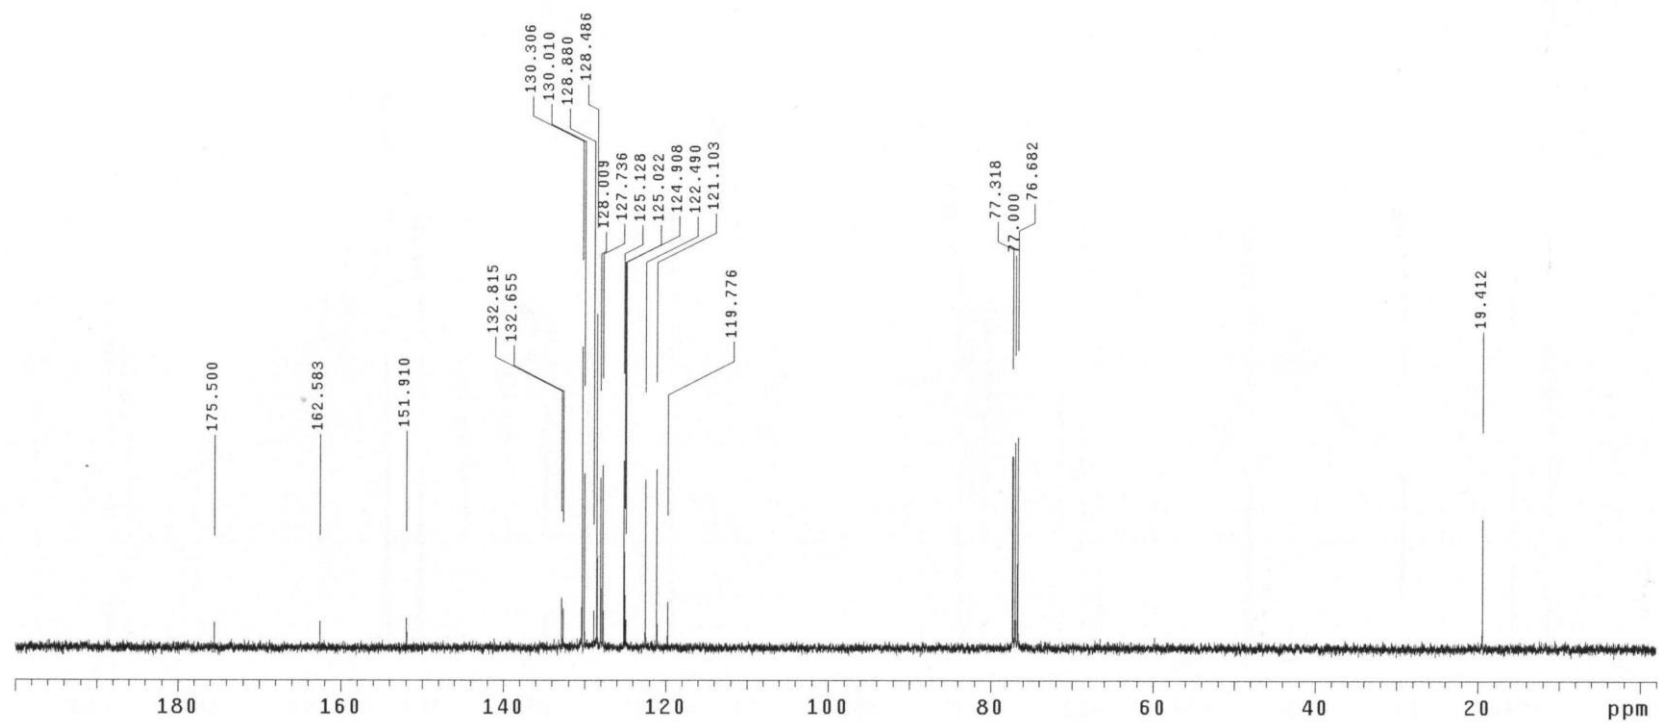

# Compound 8a (<sup>1</sup>H-NMR spectral data)

SPhPh20

Pulse Sequence: s2pu1

UNITYplus-400 "unity400"

Date: May 23 2018

Solvent: CDCl<sub>3</sub>

Ambient temperature

Total 32 repetitions

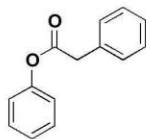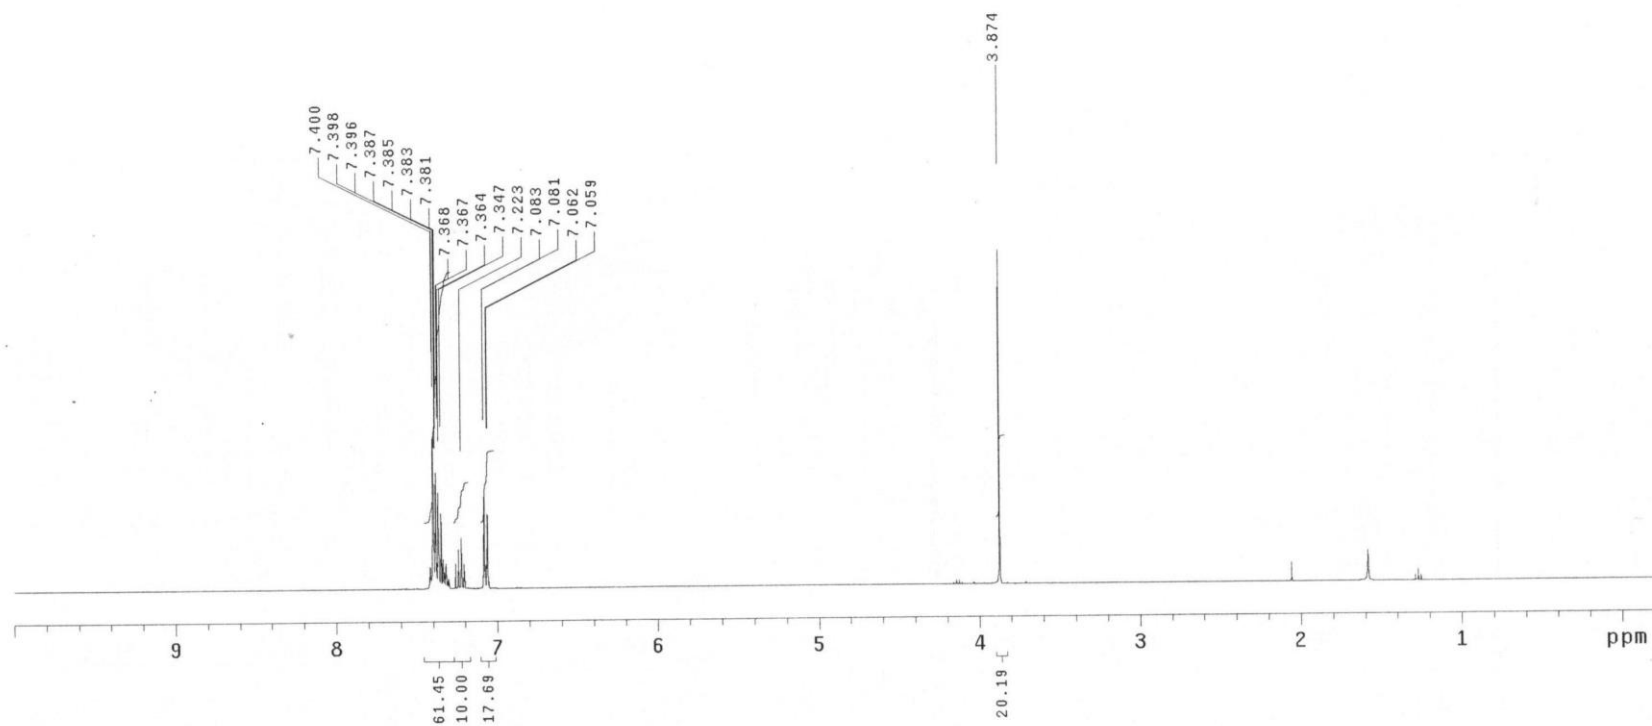

# Compound 8a ( $^{13}\text{C}$ -NMR spectral data)

SHPh20

Pulse Sequence: s2pu1

UNITYplus-400 "unity400"

Date: May 23 2018

Solvent:  $\text{CDCl}_3$

Ambient temperature

Total 560 repetitions

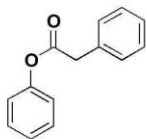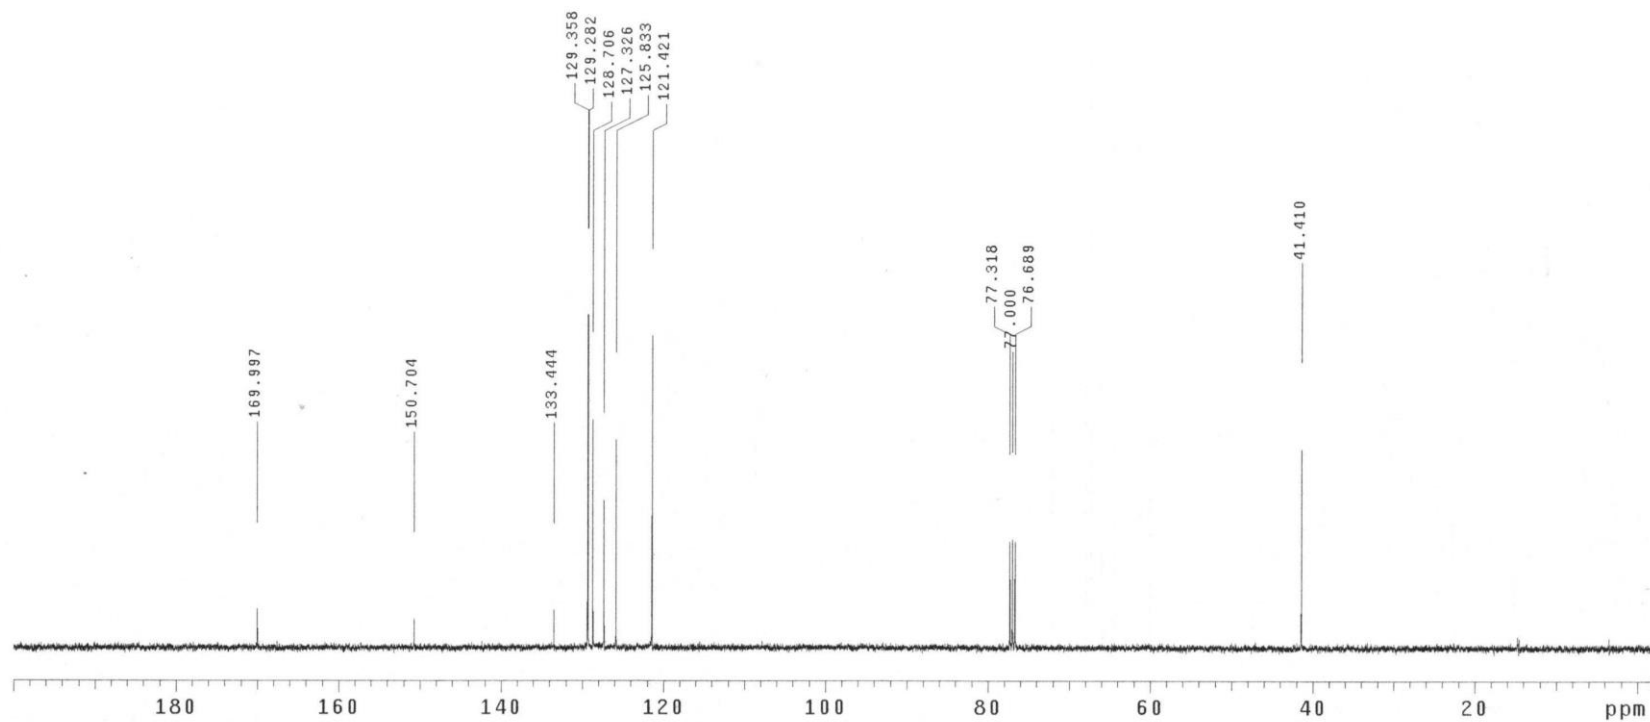

# Compound 8b (<sup>1</sup>H-NMR spectral data)

SHF20

Pulse Sequence: s2pu1

UNITYplus-400 "unity400"

Date: May 28 2018

Solvent: CDCl<sub>3</sub>

Ambient temperature

Total 32 repetitions

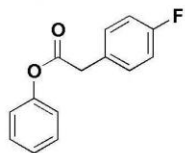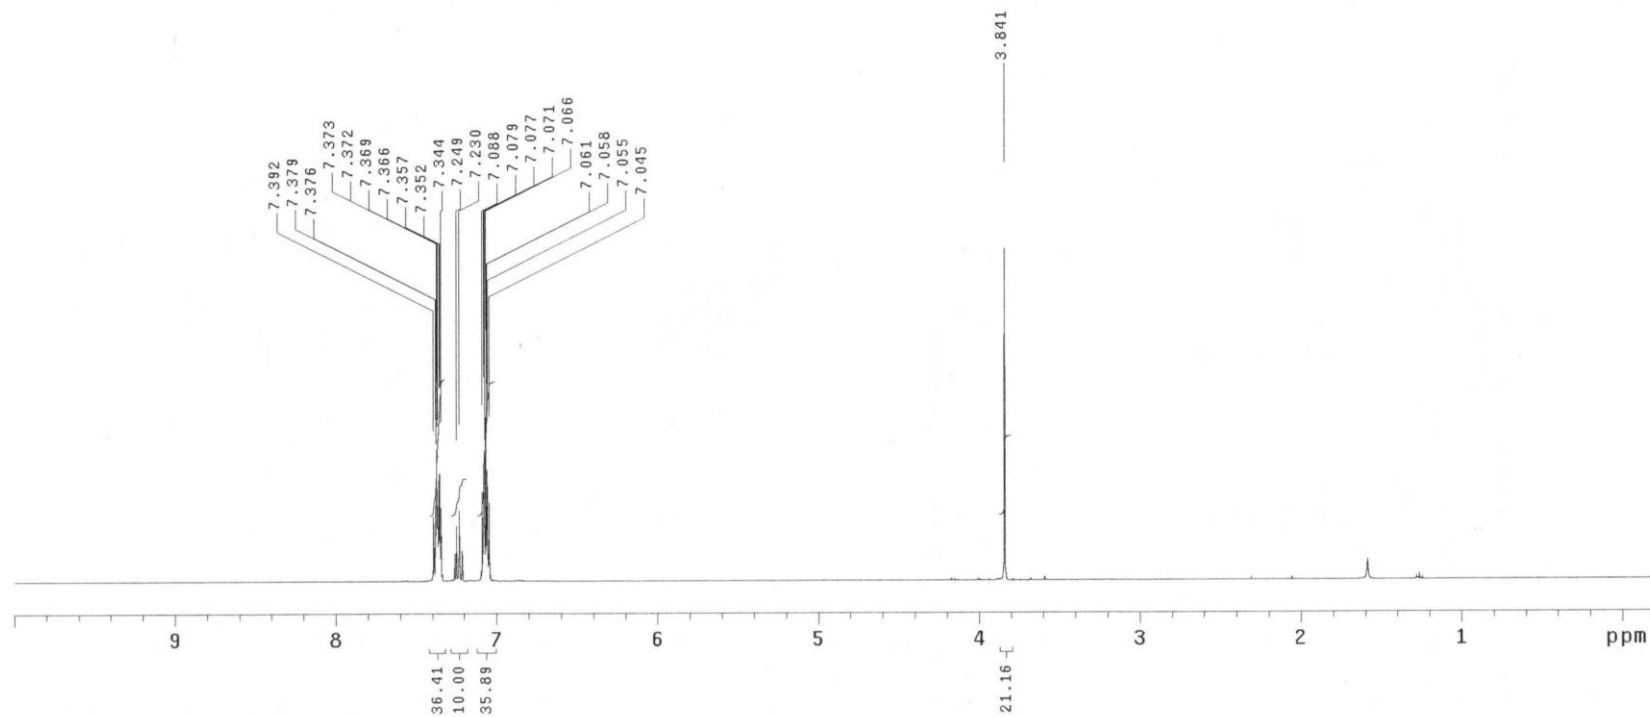

# Compound 8b ( $^{13}\text{C}$ -NMR spectral data)

SHF20

Pulse Sequence: s2pu1  
UNITYplus-400 "unity400"  
Date: May 28 2018  
Solvent: CDCl<sub>3</sub>  
Ambient temperature  
Total 1136 repetitions

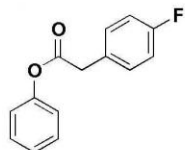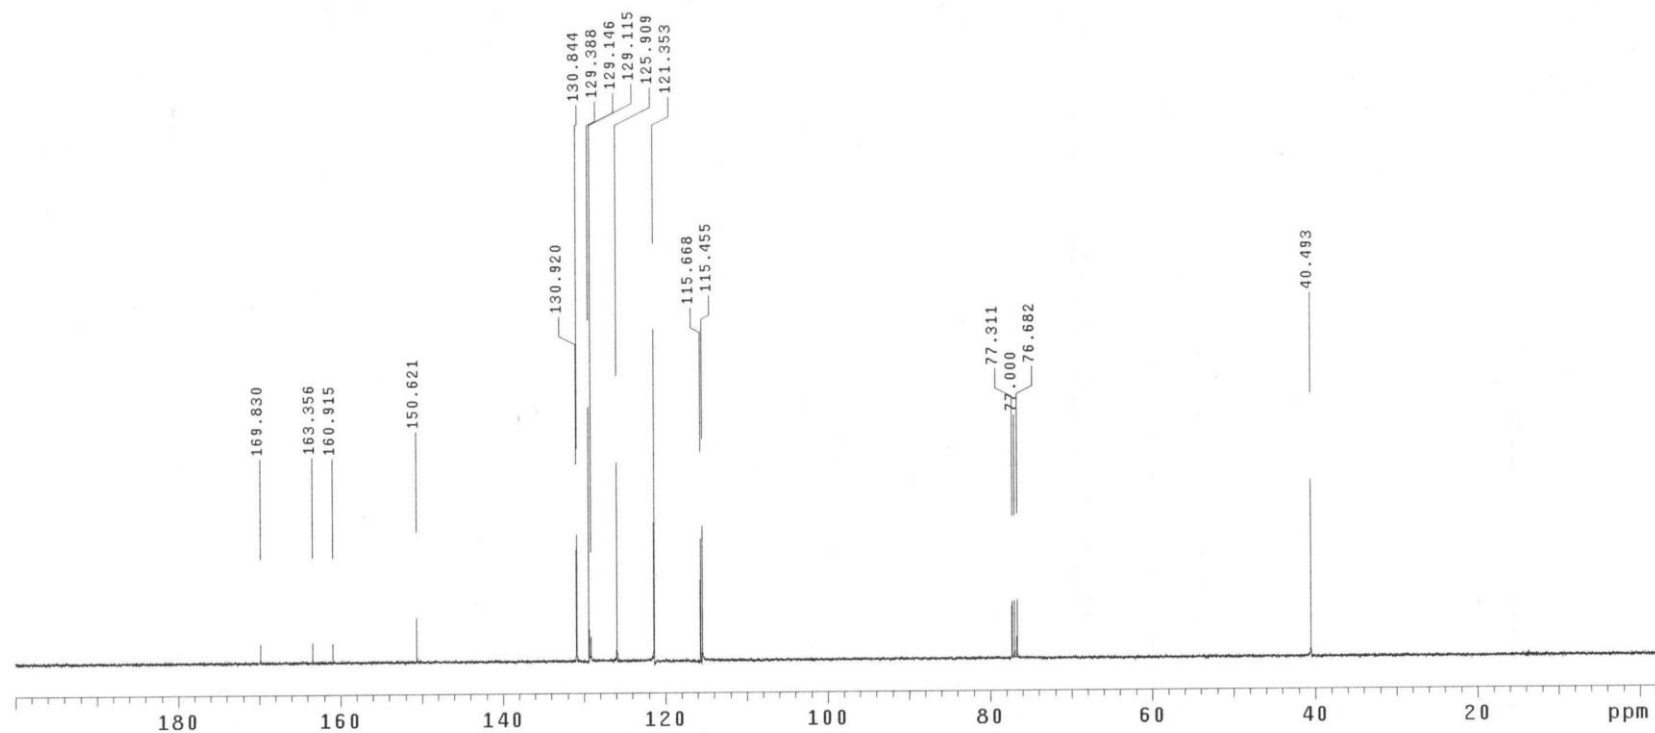

# Compound 8c (<sup>1</sup>H-NMR spectral data)

SHB1Ph

Pulse Sequence: s2pu1

UNITYplus-400 "unity400"

Date: Jun 8 2018

Solvent: CDCl<sub>3</sub>

Ambient temperature

Total 32 repetitions

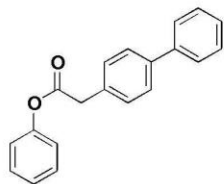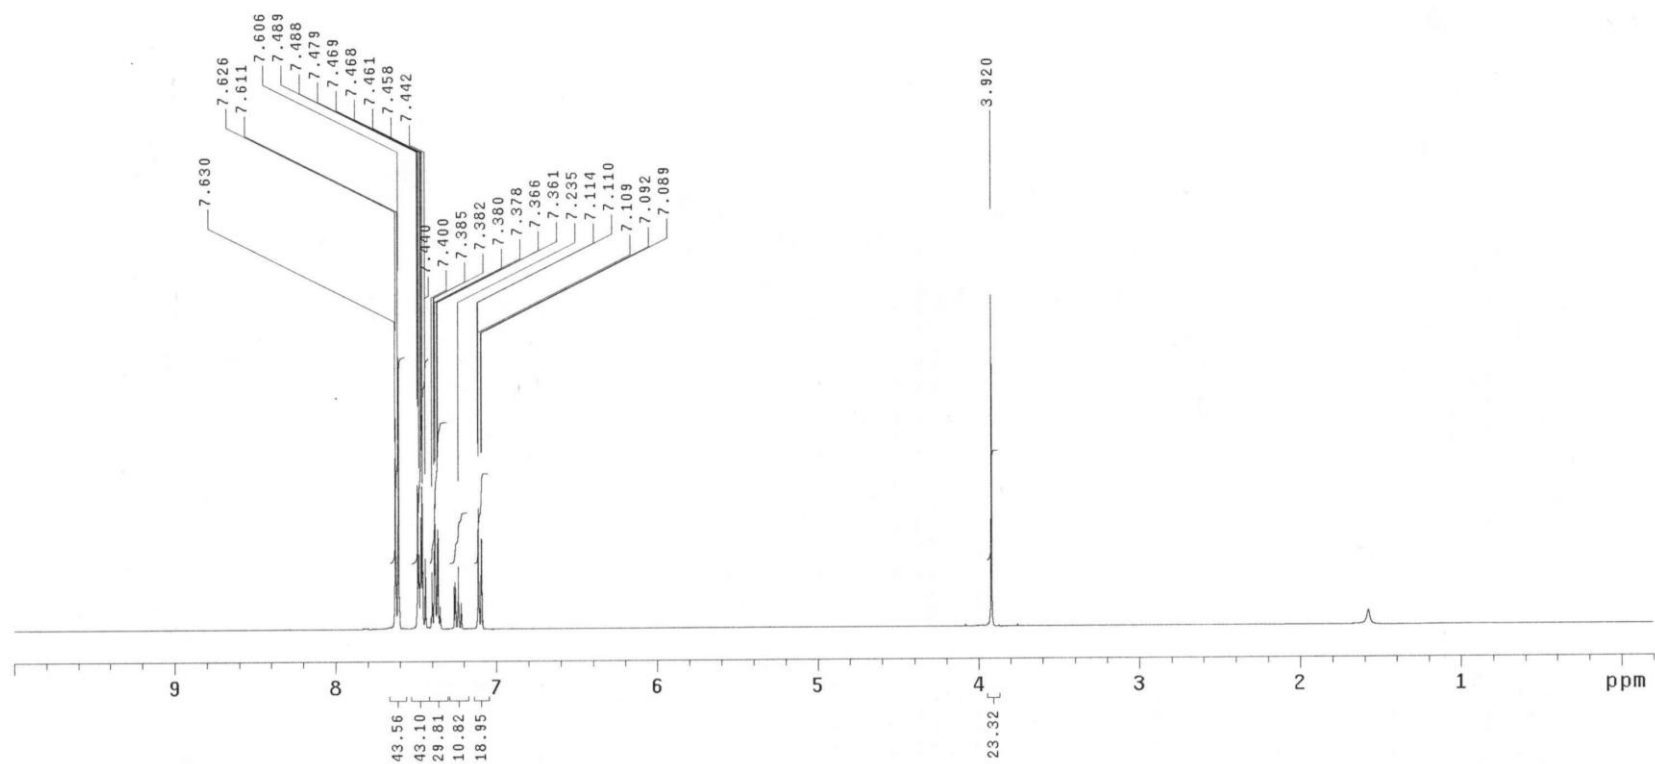

# Compound 8c (<sup>13</sup>C-NMR spectral data)

SHB1Ph

Pulse Sequence: s2pu1

UNITYplus-400 "unity400"

Date: Jun 8 2018

Solvent: CDCl<sub>3</sub>

Ambient temperature

Total 704 repetitions

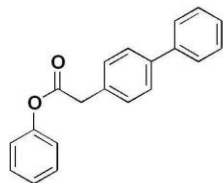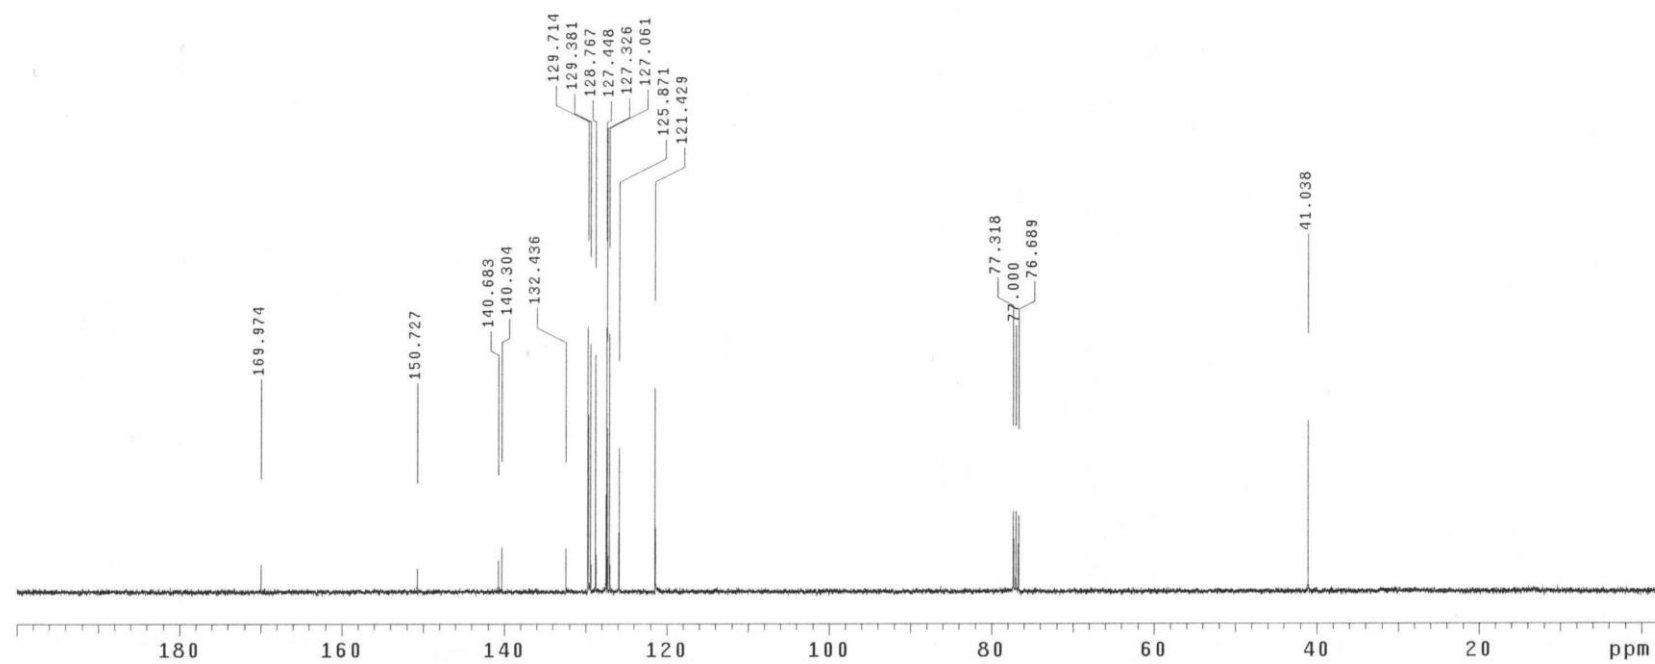

# Compound 8d (<sup>1</sup>H-NMR spectral data)

SH2F19

Pulse Sequence: s2pu1

UNITYplus-400 "unity400"

Date: Jun 6 2018

Solvent: CDCl<sub>3</sub>

Ambient temperature

Total 32 repetitions

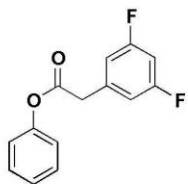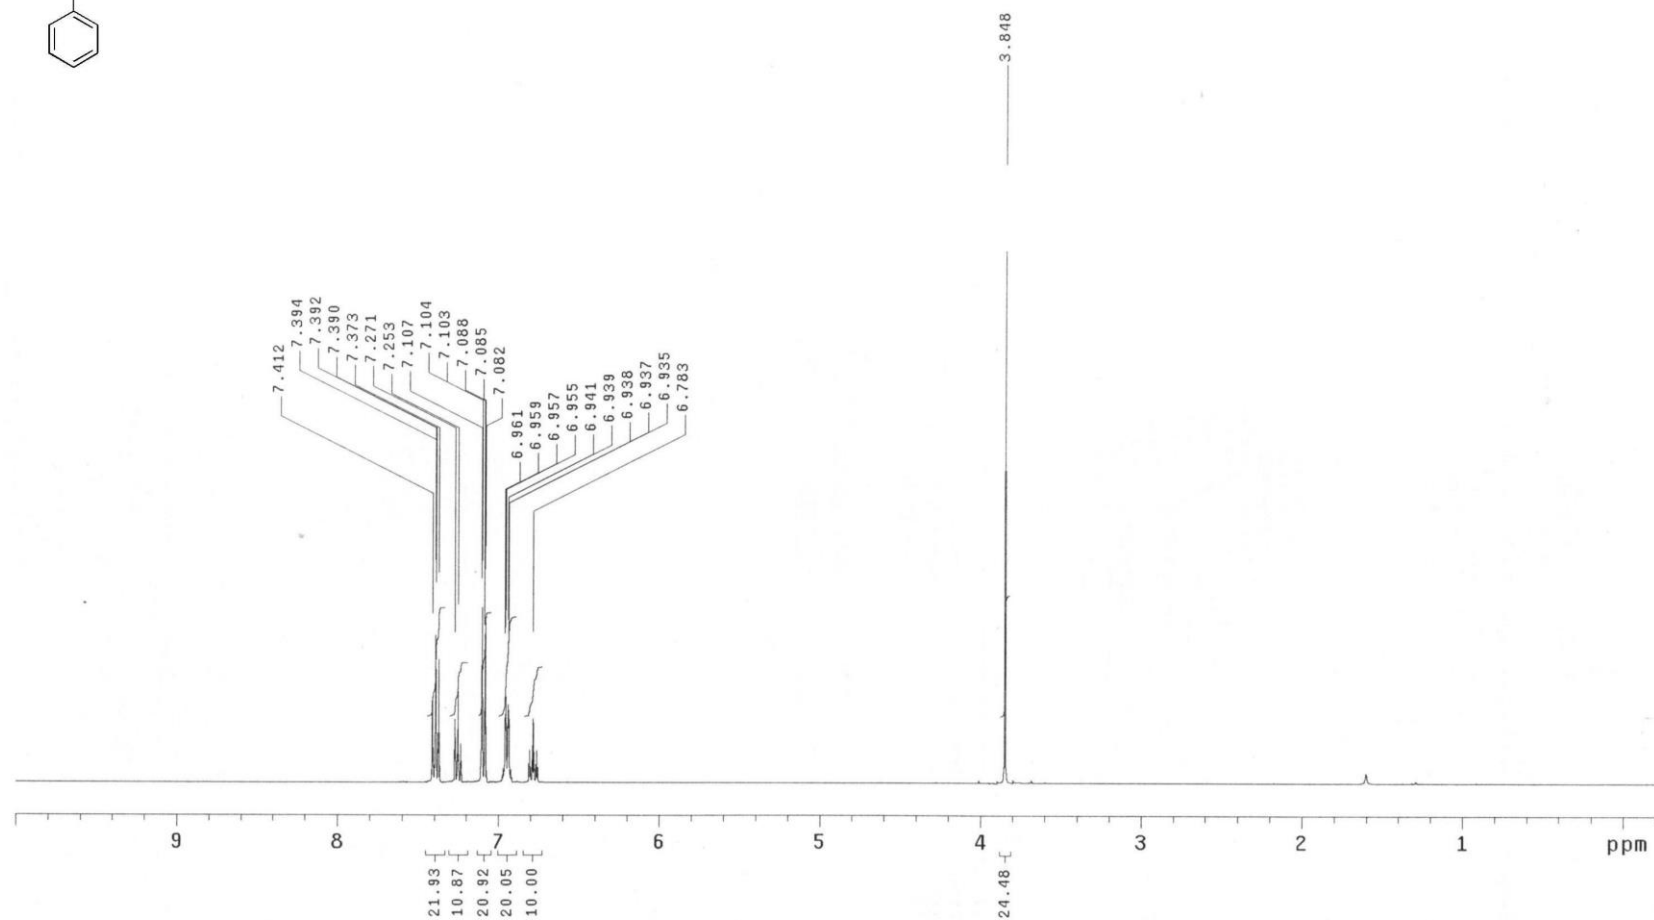



# Compound 8d (<sup>13</sup>C-NMR spectral data)

SH2F19

Pulse Sequence: s2pu1

UNITYplus-400 "unity400"

Date: Jun 6 2018

Solvent: CDCl<sub>3</sub>

Ambient temperature

Total 512 repetitions

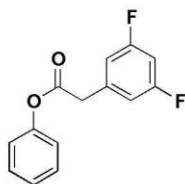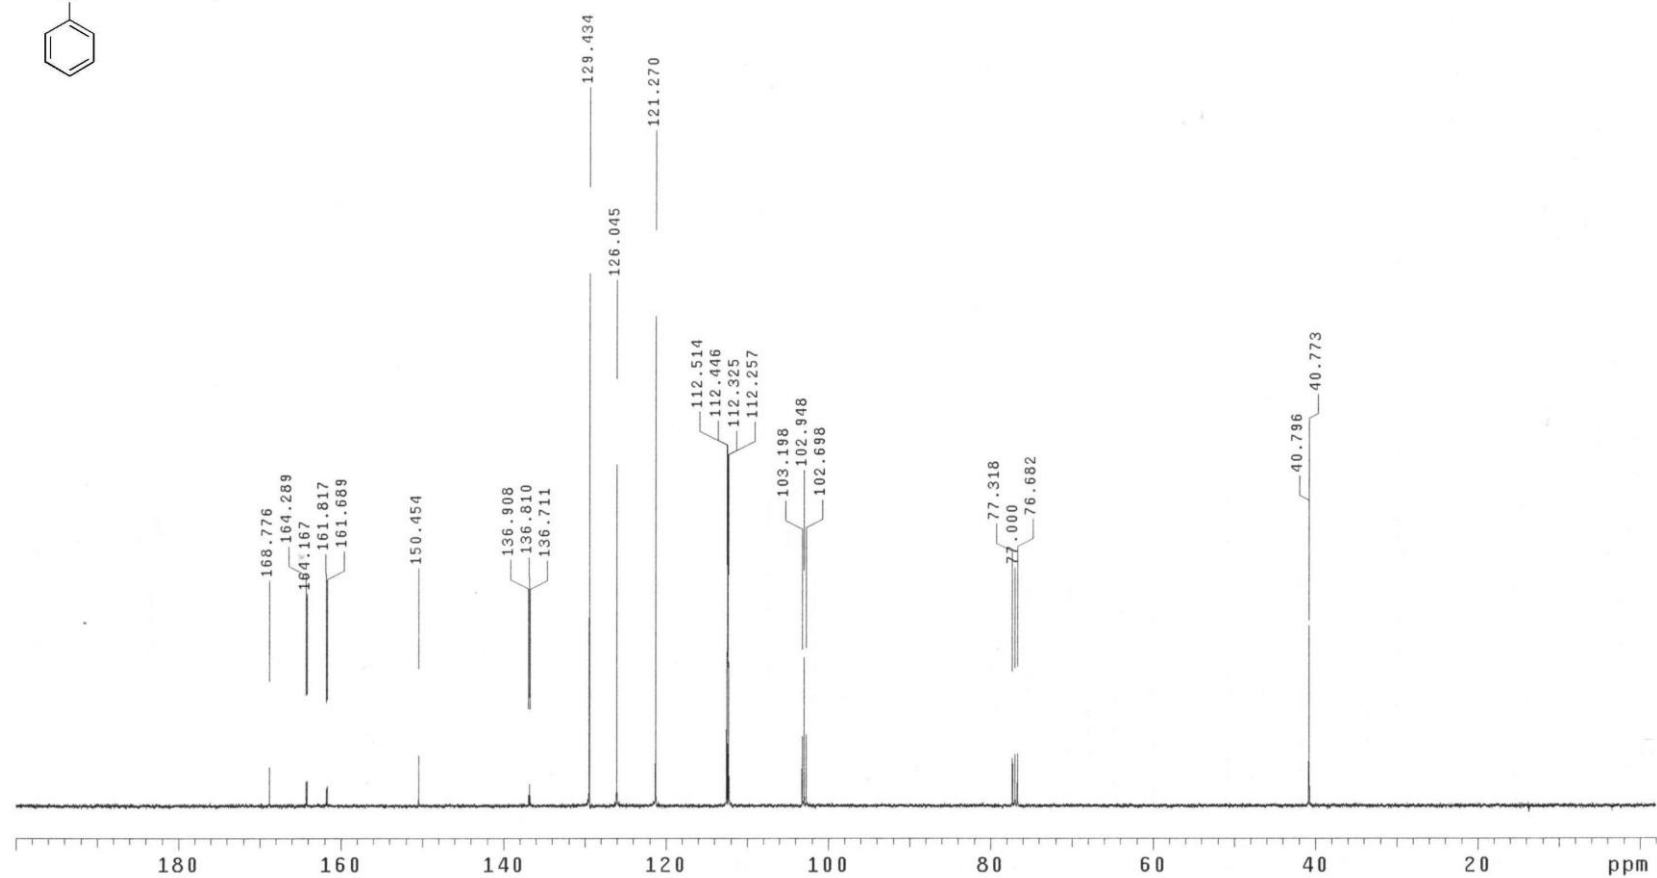

# Compound 8e (<sup>1</sup>H-NMR spectral data)

SHN02 32

Pulse Sequence: s2pu1  
 UNITYplus-400 "unity400"  
 Date: Jun 11 2018  
 Solvent: CDCl<sub>3</sub>  
 Ambient temperature  
 Total 32 repetitions

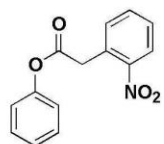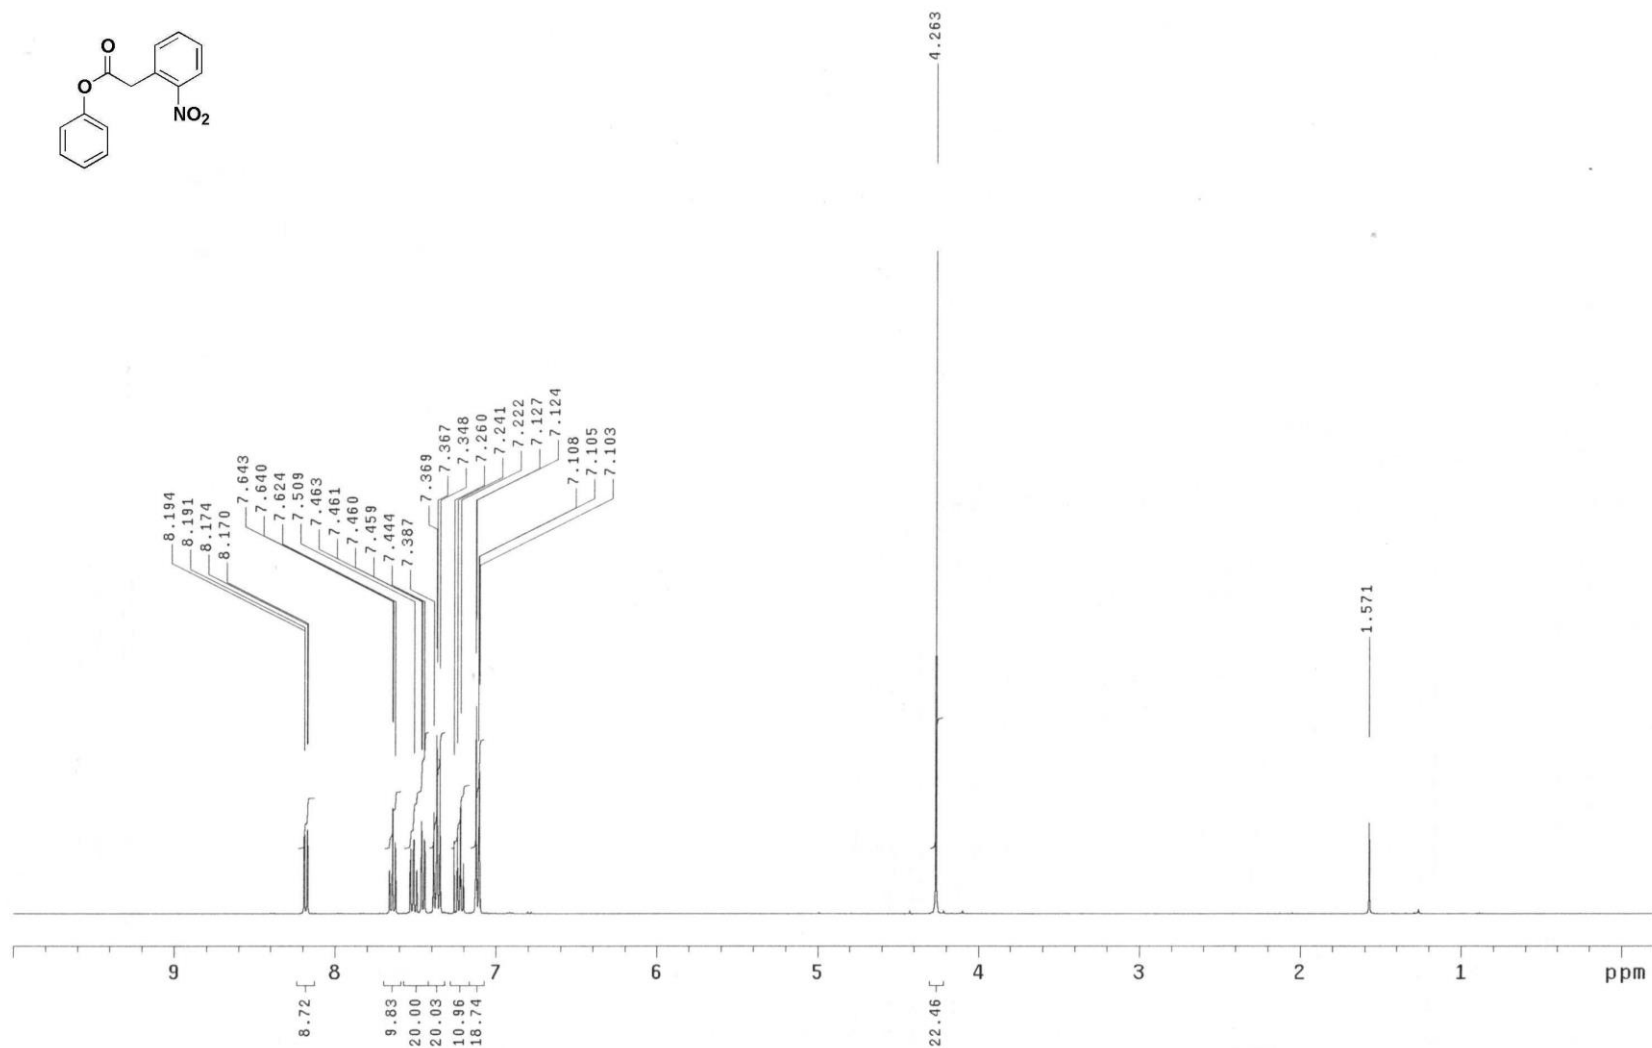

# Compound 8e (<sup>13</sup>C-NMR spectral data)

SHN02 32

Pulse Sequence: s2pul  
UNITYplus-400 "unity400"  
Date: Jun 11 2018  
Solvent: CDCl<sub>3</sub>  
Ambient temperature  
Total 1216 repetitions

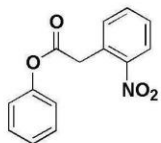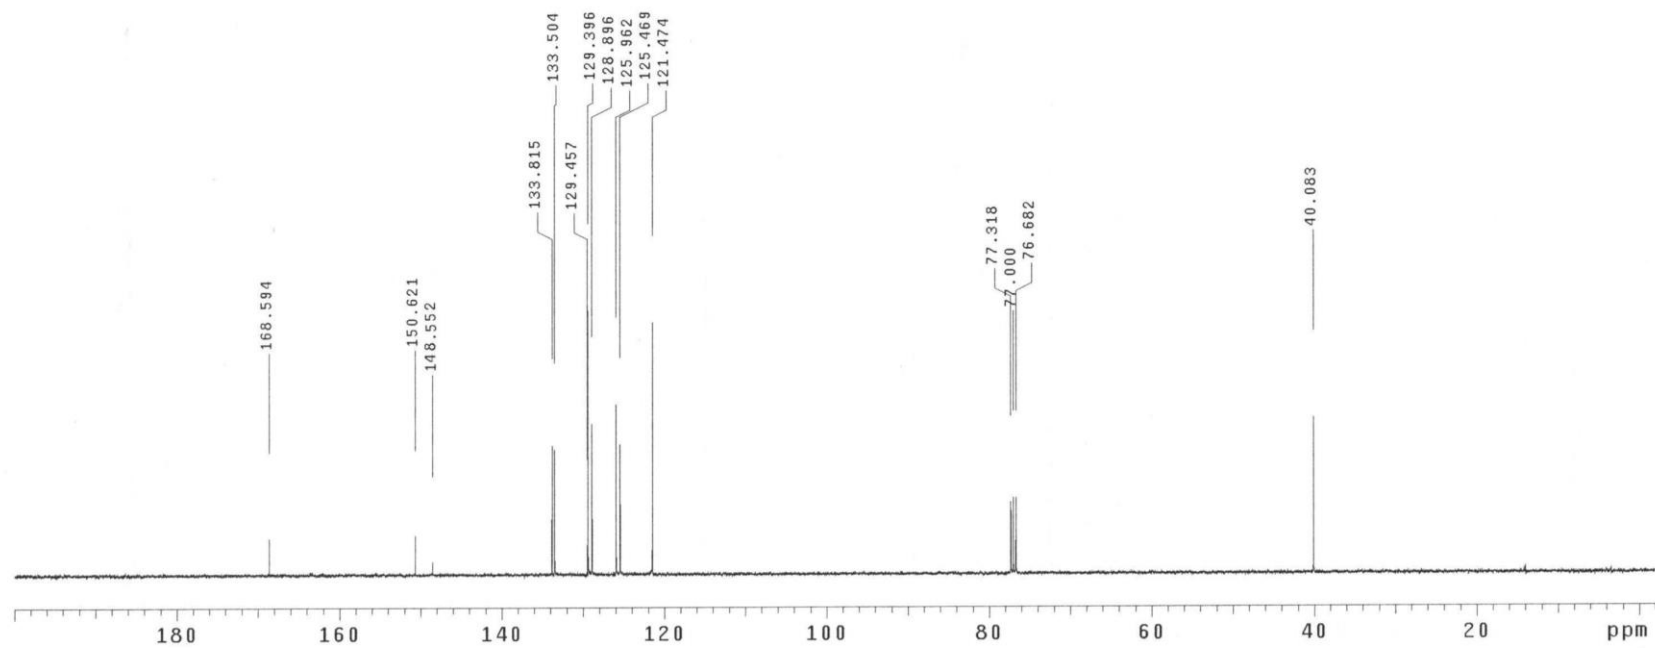

# Compound 8f (<sup>1</sup>H-NMR spectral data)

SHS20

Pulse Sequence: s2pu1  
UNITYplus-400 "unity400"  
Date: Jun 5 2018  
Solvent: CDCl<sub>3</sub>  
Ambient temperature  
Total 32 repetitions

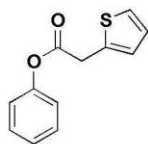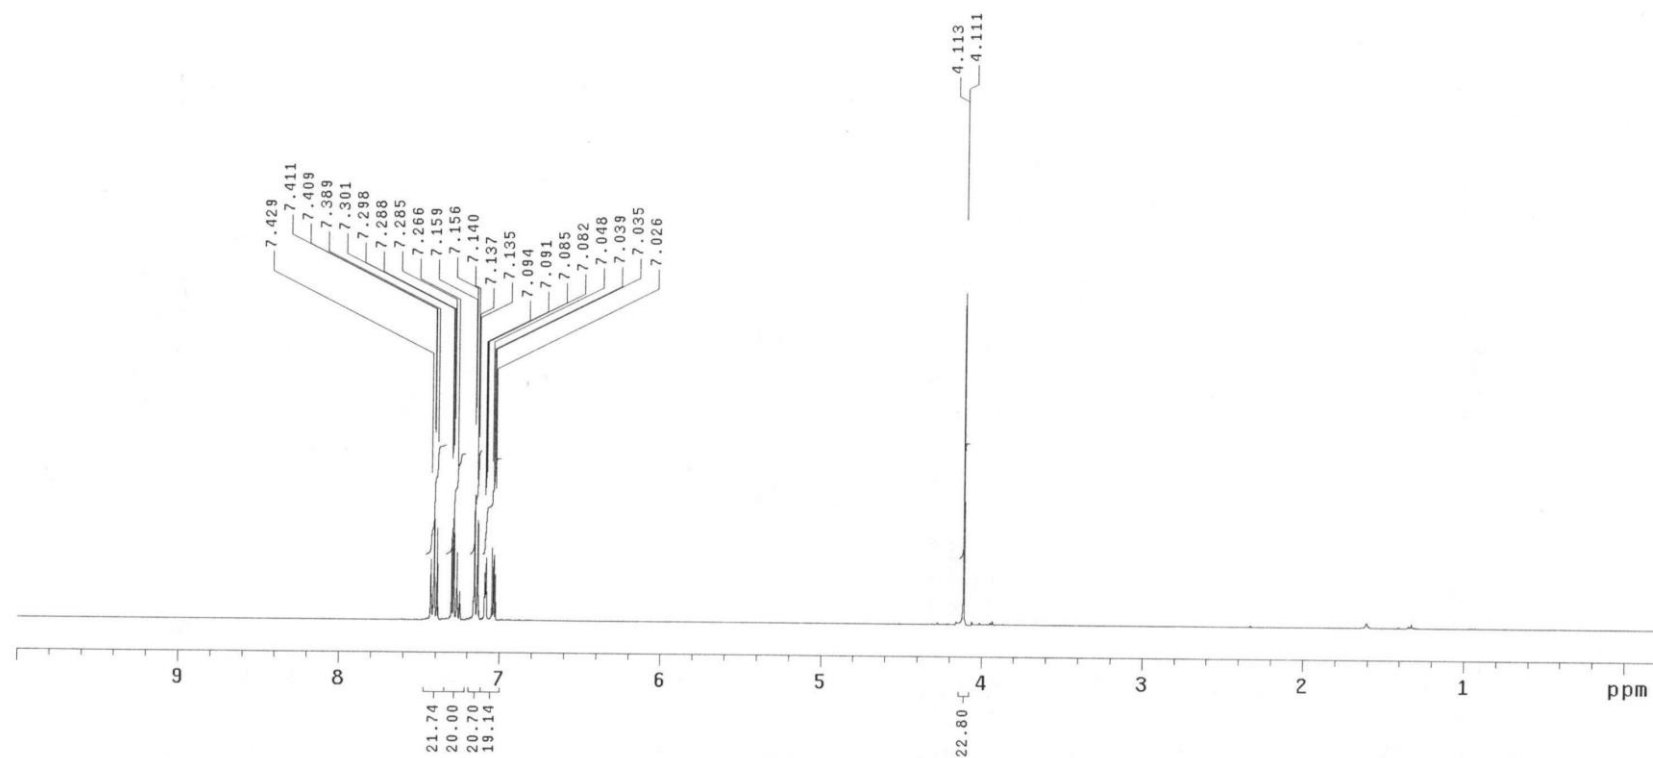

# Compound 8f (<sup>13</sup>C-NMR spectral data)

SHS20

Pulse Sequence: s2pu1

UNITYplus-400 "unity400"

Date: Jun 5 2018

Solvent: CDCl<sub>3</sub>

Ambient temperature

Total 64 repetitions

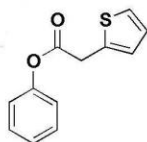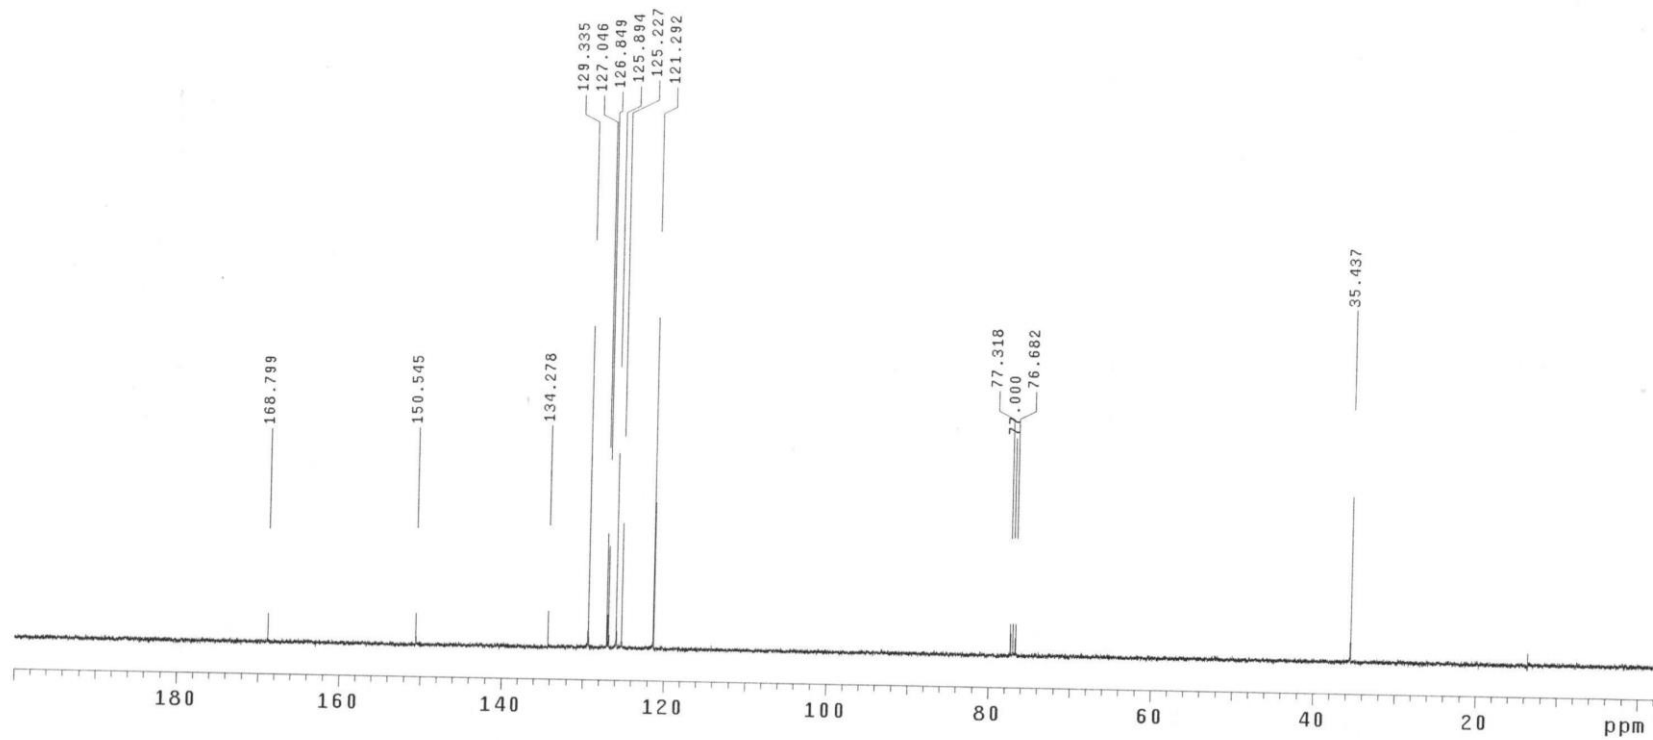

# Compound 9a (<sup>1</sup>H-NMR spectral data)

YTPH1C13

Pulse Sequence: s2pu1

UNITYplus-400 "unity400"

Date: Aug 30 2018

Solvent: CDCl<sub>3</sub>

Ambient temperature

Total 32 repetitions

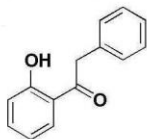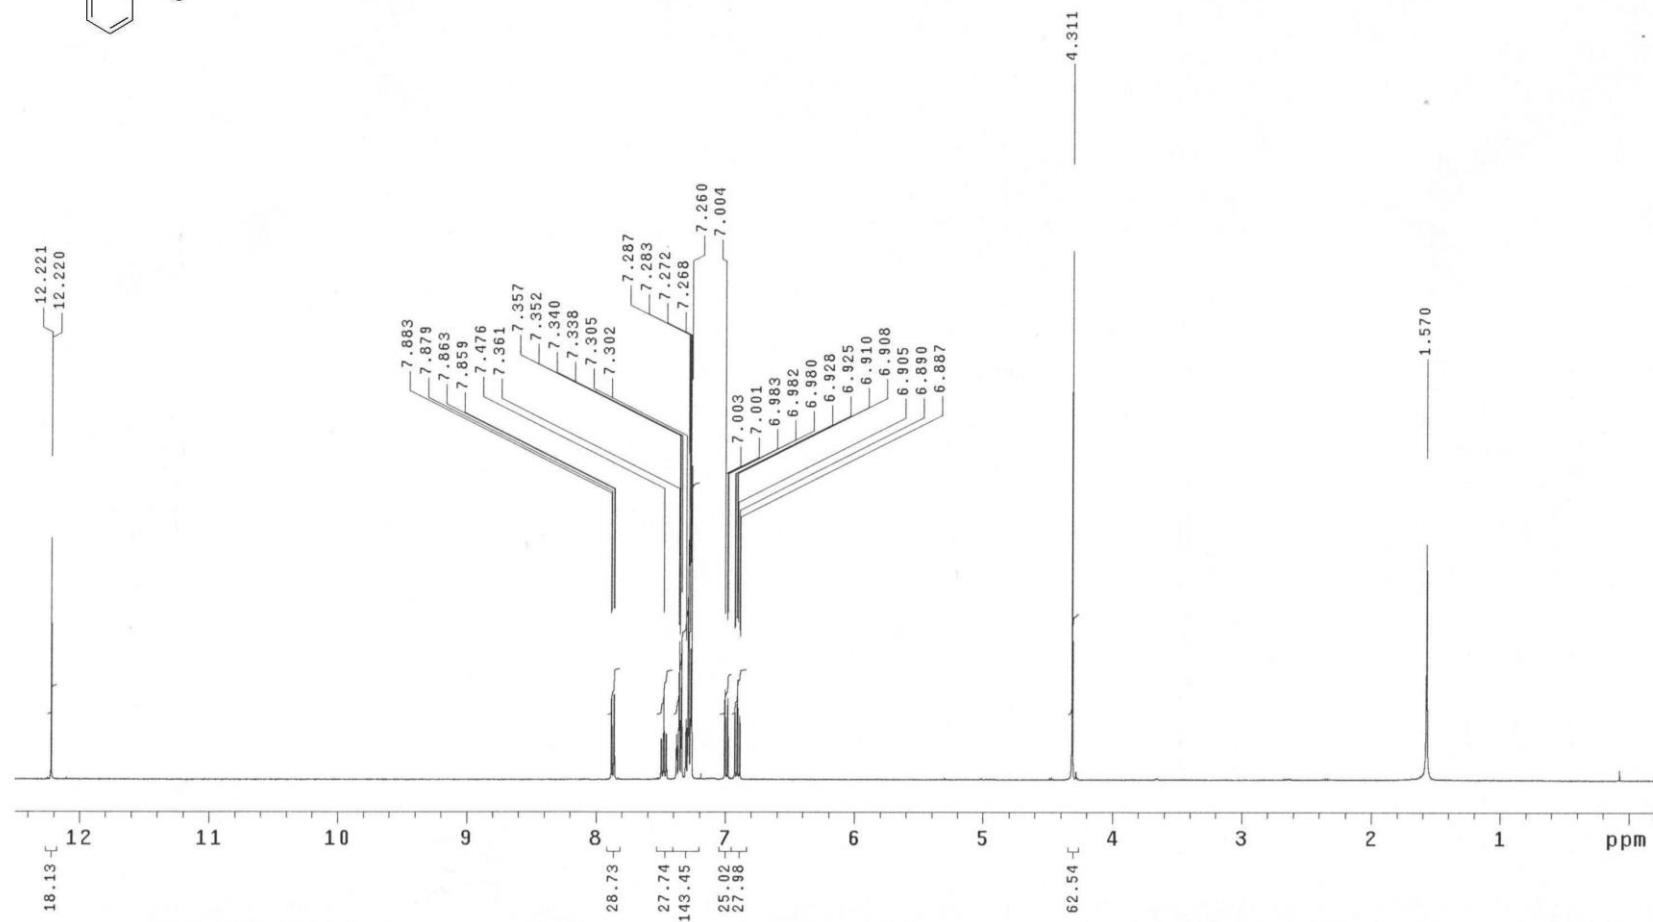

# Compound 9a ( $^{13}\text{C}$ -NMR spectral data)

YTPH41C13

Pulse Sequence: s2pul

UNITYplus-400 "unity400"

Date: Aug 30 2018

Solvent: CDCl<sub>3</sub>

Ambient temperature

Total 2720 repetitions

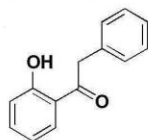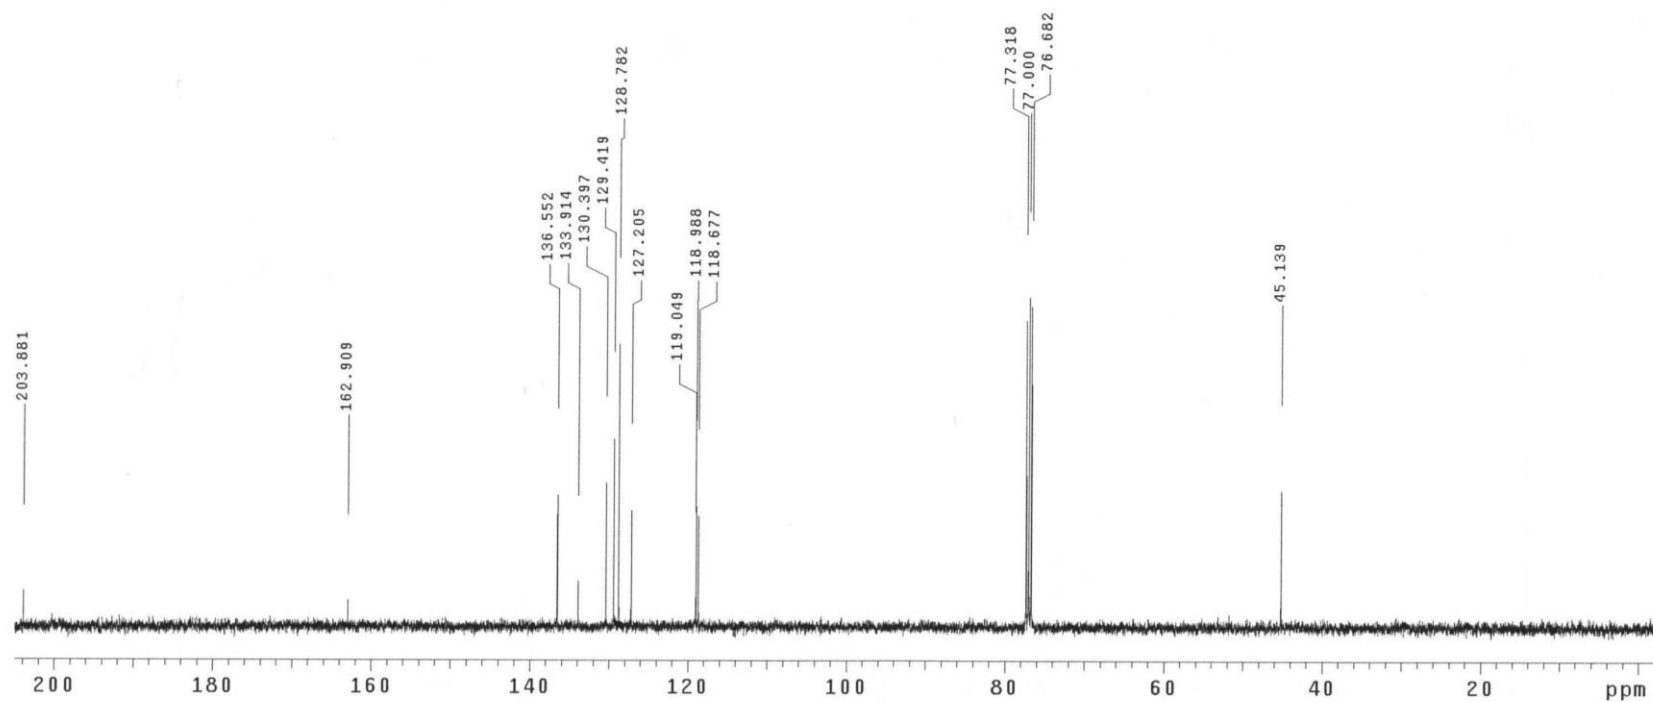

# Compound 9b (<sup>1</sup>H-NMR spectral data)

SHFA1C13

Pulse Sequence: s2pu1

UNITYplus-400 "unity400"

Date: Aug 2 2018

Solvent: CDCl<sub>3</sub>

Ambient temperature

Total 32 repetitions

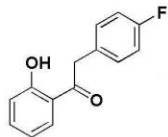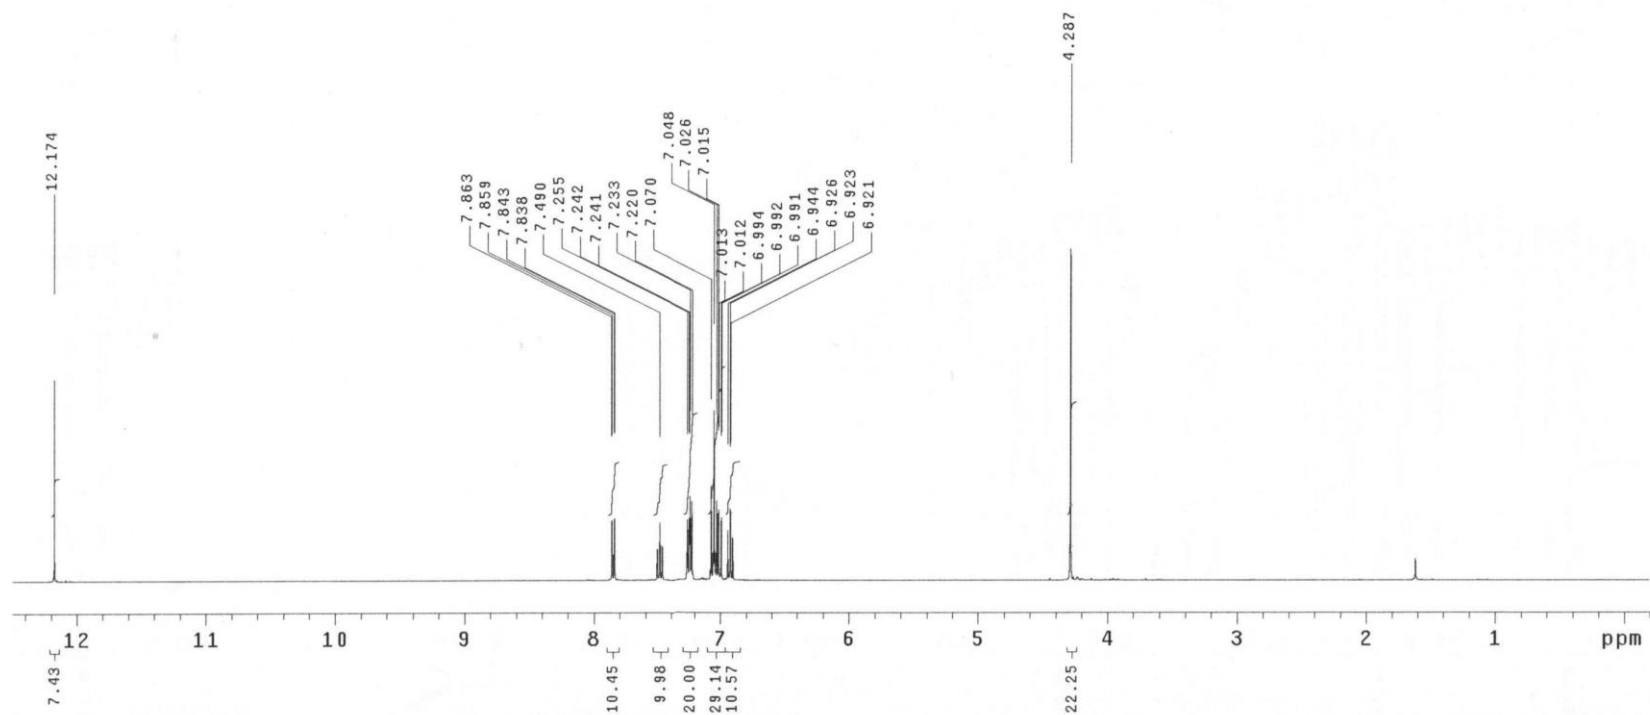



# Compound 9b (<sup>13</sup>C-NMR spectral data)

SHFA1C13

Pulse Sequence: s2pu1

UNITYplus-400 "unity400"

Date: Aug 2 2018

Solvent: CDCl<sub>3</sub>

Ambient temperature

Total 544 repetitions

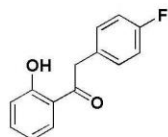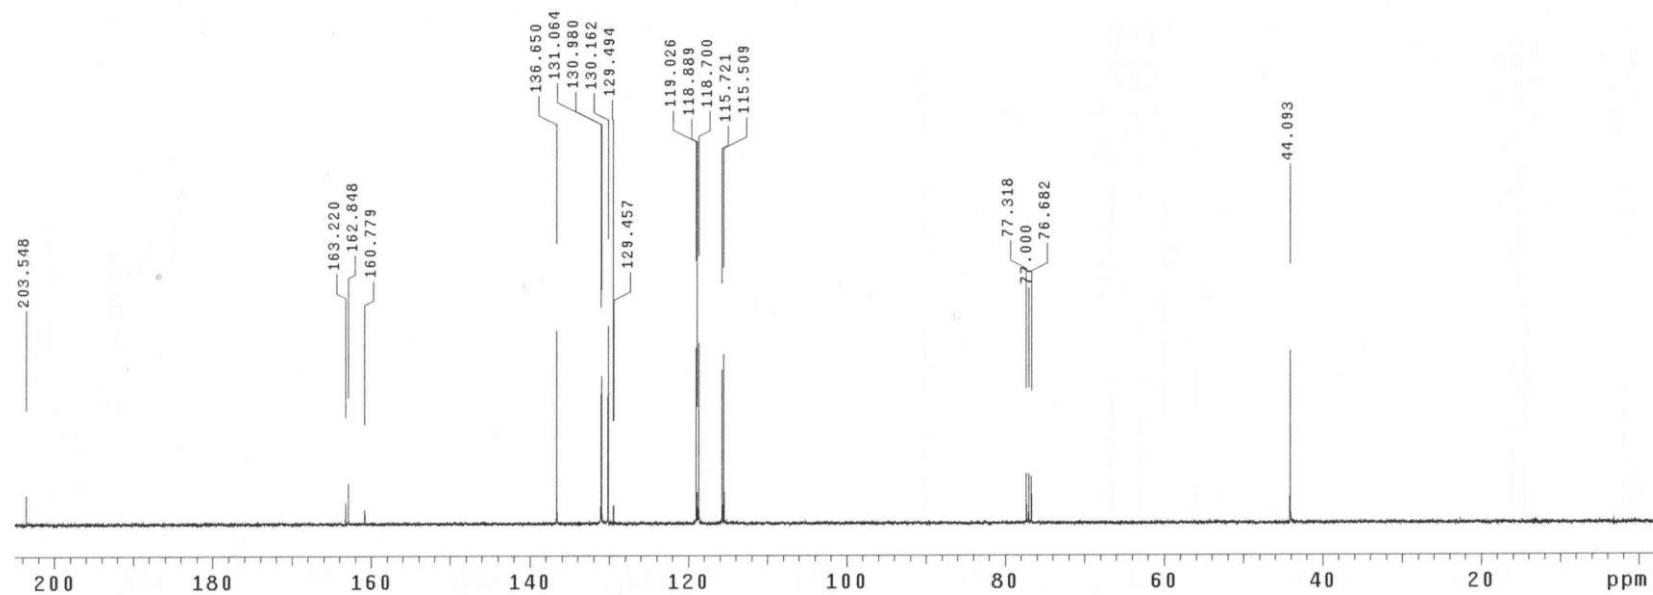

# Compound 9c (<sup>1</sup>H-NMR spectral data-1)

SHBiPhA1C13

Pulse Sequence: s2pu1

UNITYplus-400 "unity400"

Date: Aug 8 2018

Solvent: CDCl<sub>3</sub>

Ambient temperature

Total 32 repetitions

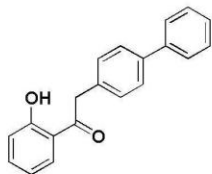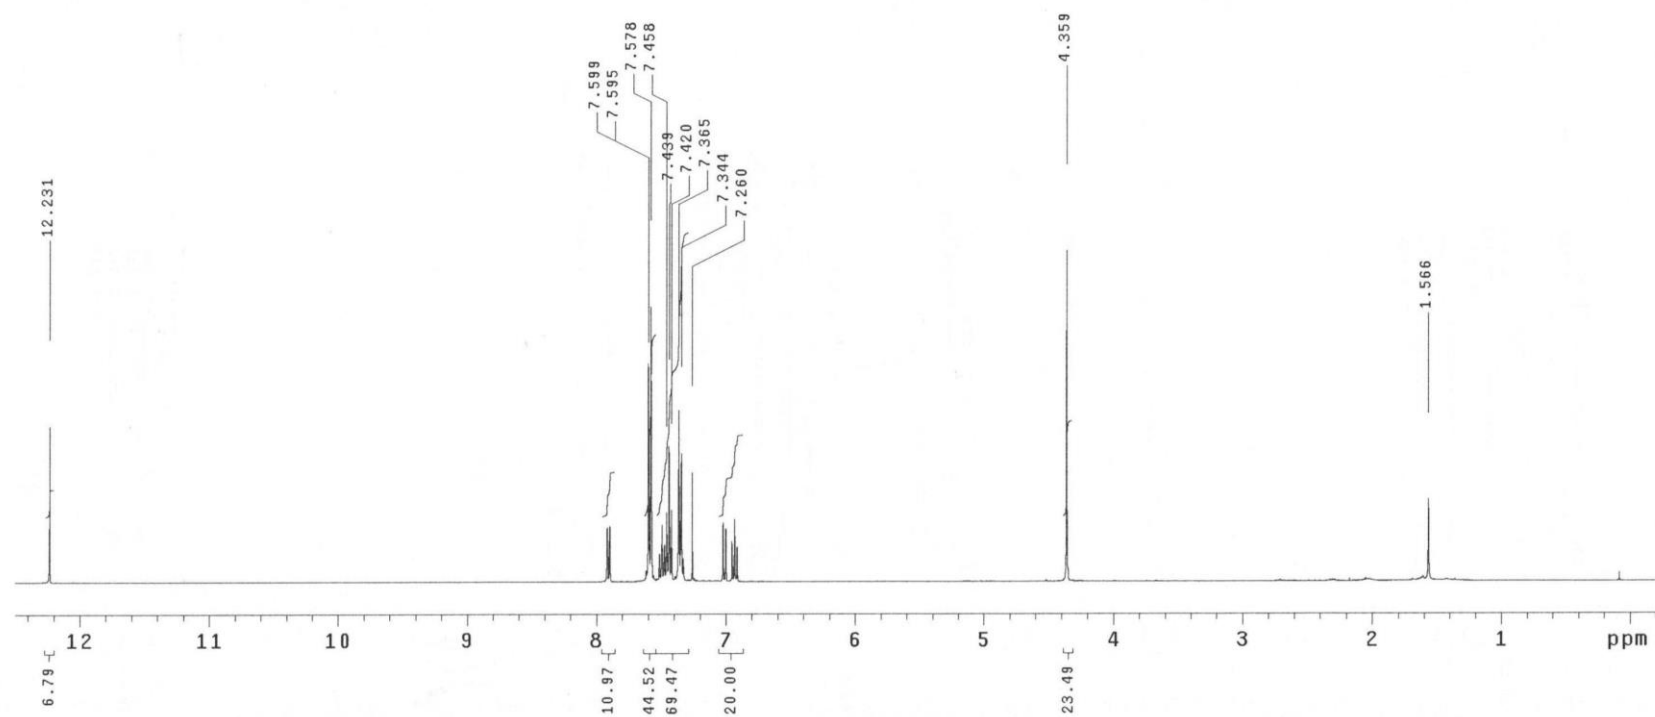

# Compound 9c (<sup>1</sup>H-NMR spectral data-2)

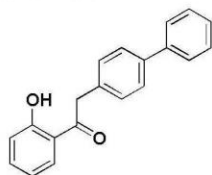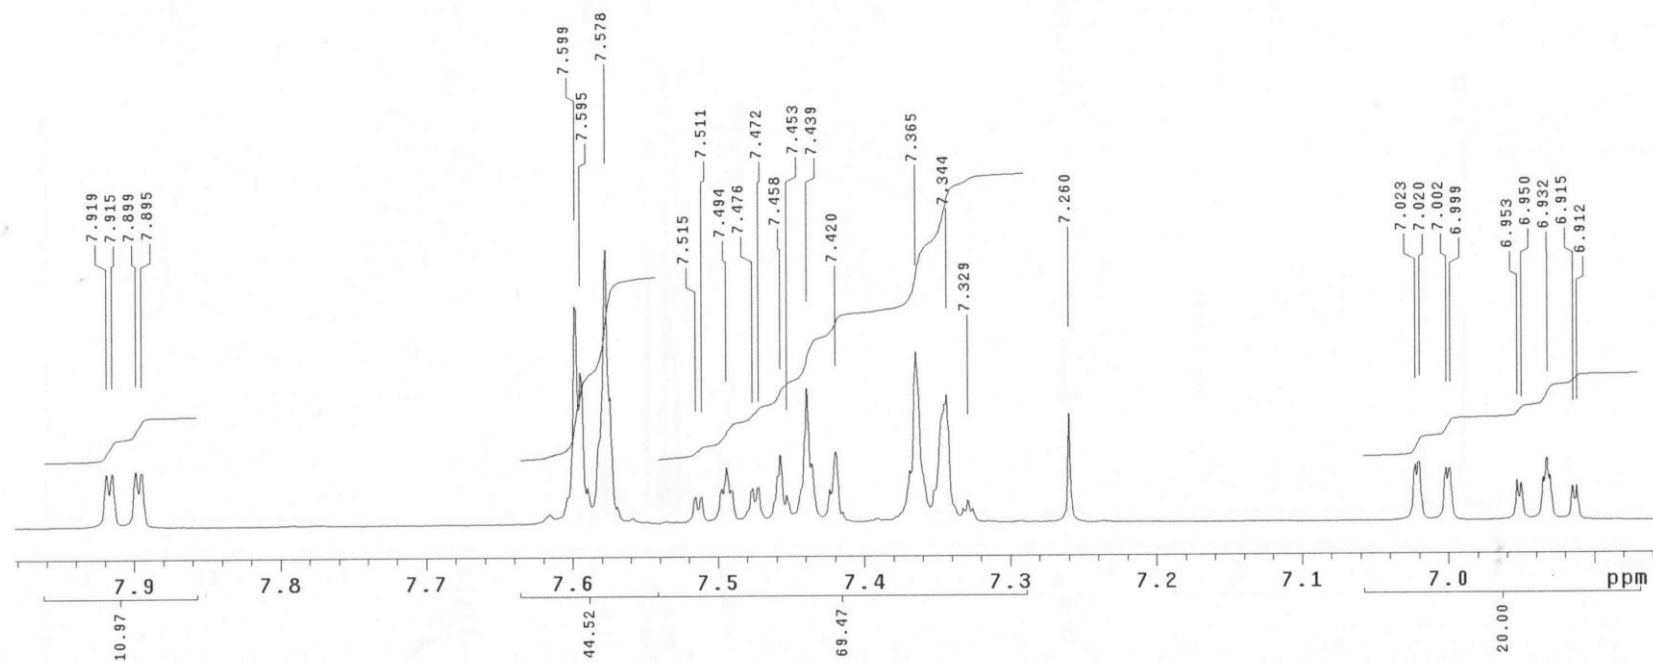

# Compound 9c (<sup>13</sup>C-NMR spectral data)

SHBiPhA1C13

Pulse Sequence: s2pu1

UNITYplus-400 "unity400"

Date: Aug 8 2018

Solvent: CDCl<sub>3</sub>

Ambient temperature

Total 1440 repetitions

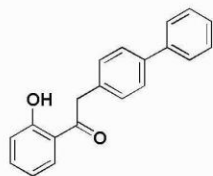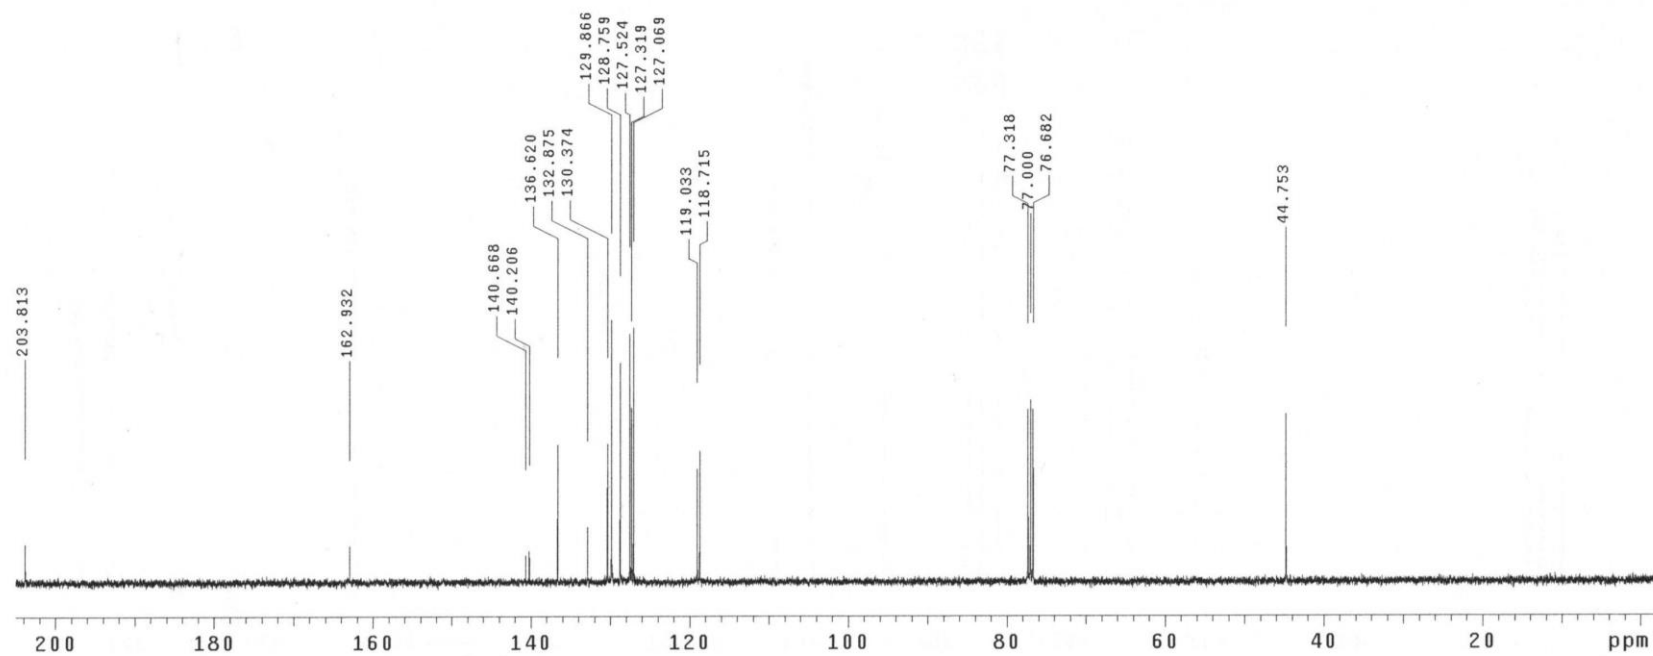

# Compound 9d (<sup>1</sup>H-NMR spectral data)

SH2FA1C13

Pulse Sequence: s2pu1

UNITYplus-400 "unity400"

Date: Aug 15 2018

Solvent: CDCl<sub>3</sub>

Ambient temperature

Total 32 repetitions

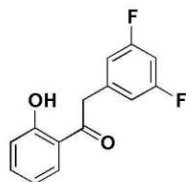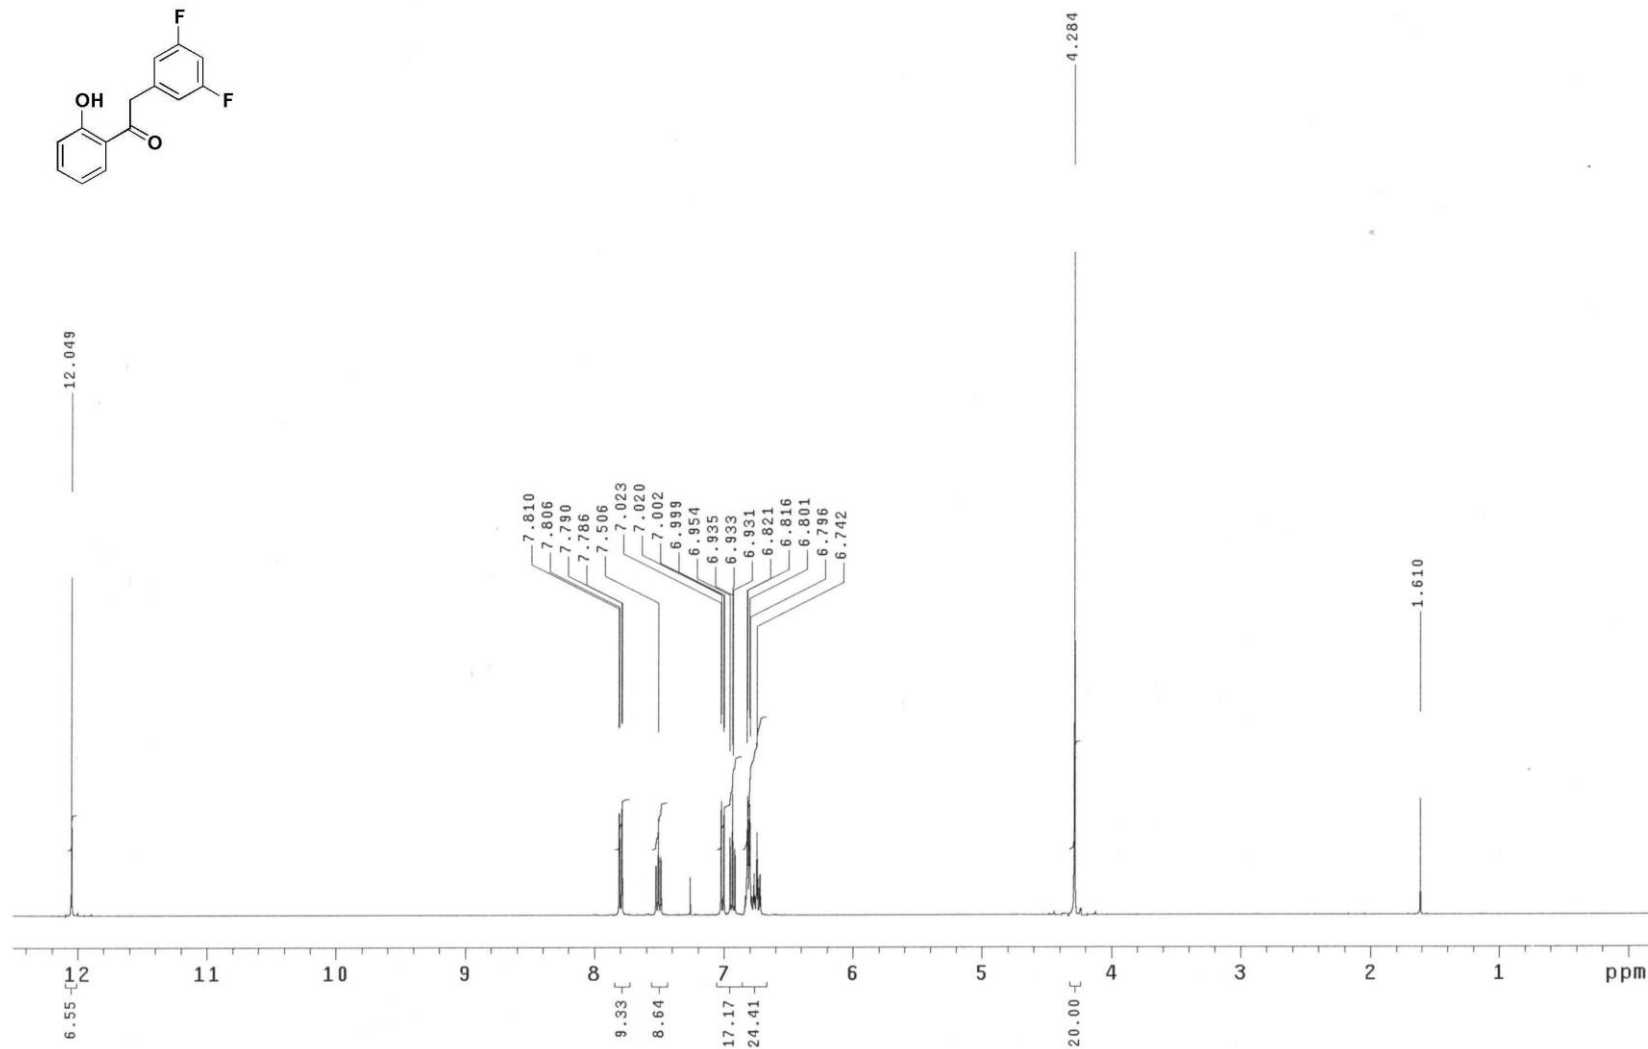

# Compound 9d (<sup>13</sup>C-NMR spectral data)

SH2FA1C13

Pulse Sequence: s2pu1  
UNITYplus-400 "unity400"  
Date: Aug 15 2018  
Solvent: CDCl<sub>3</sub>  
Ambient temperature  
Total 1072 repetitions

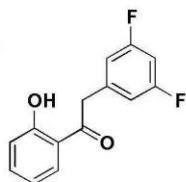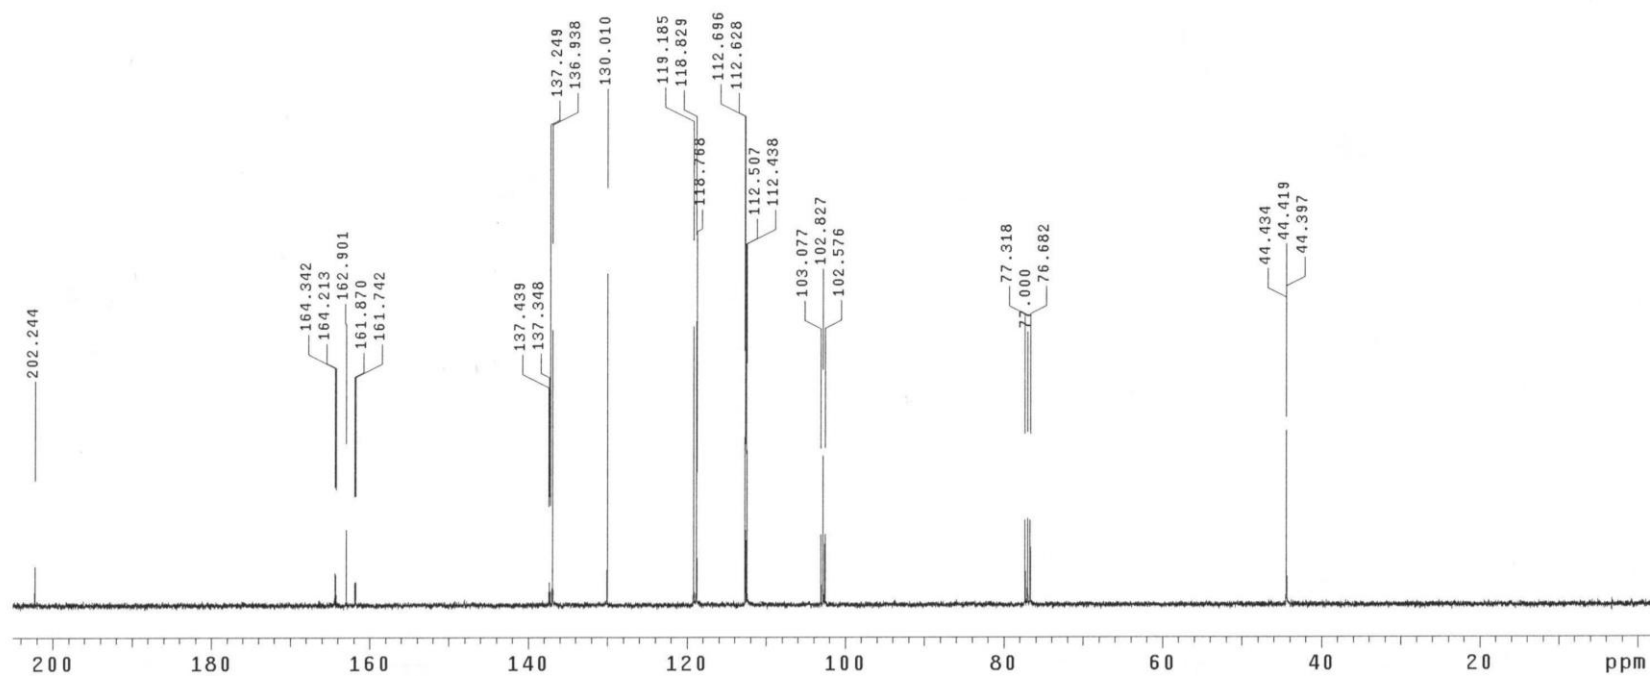

# Compound 9e (<sup>1</sup>H-NMR spectral data)

SHN02A1C13

Pulse Sequence: s2pu1

UNITYplus-400 "unity400"

Date: Aug 23 2018

Solvent: CDCl<sub>3</sub>

Ambient temperature

Total 32 repetitions

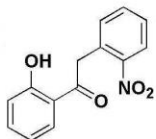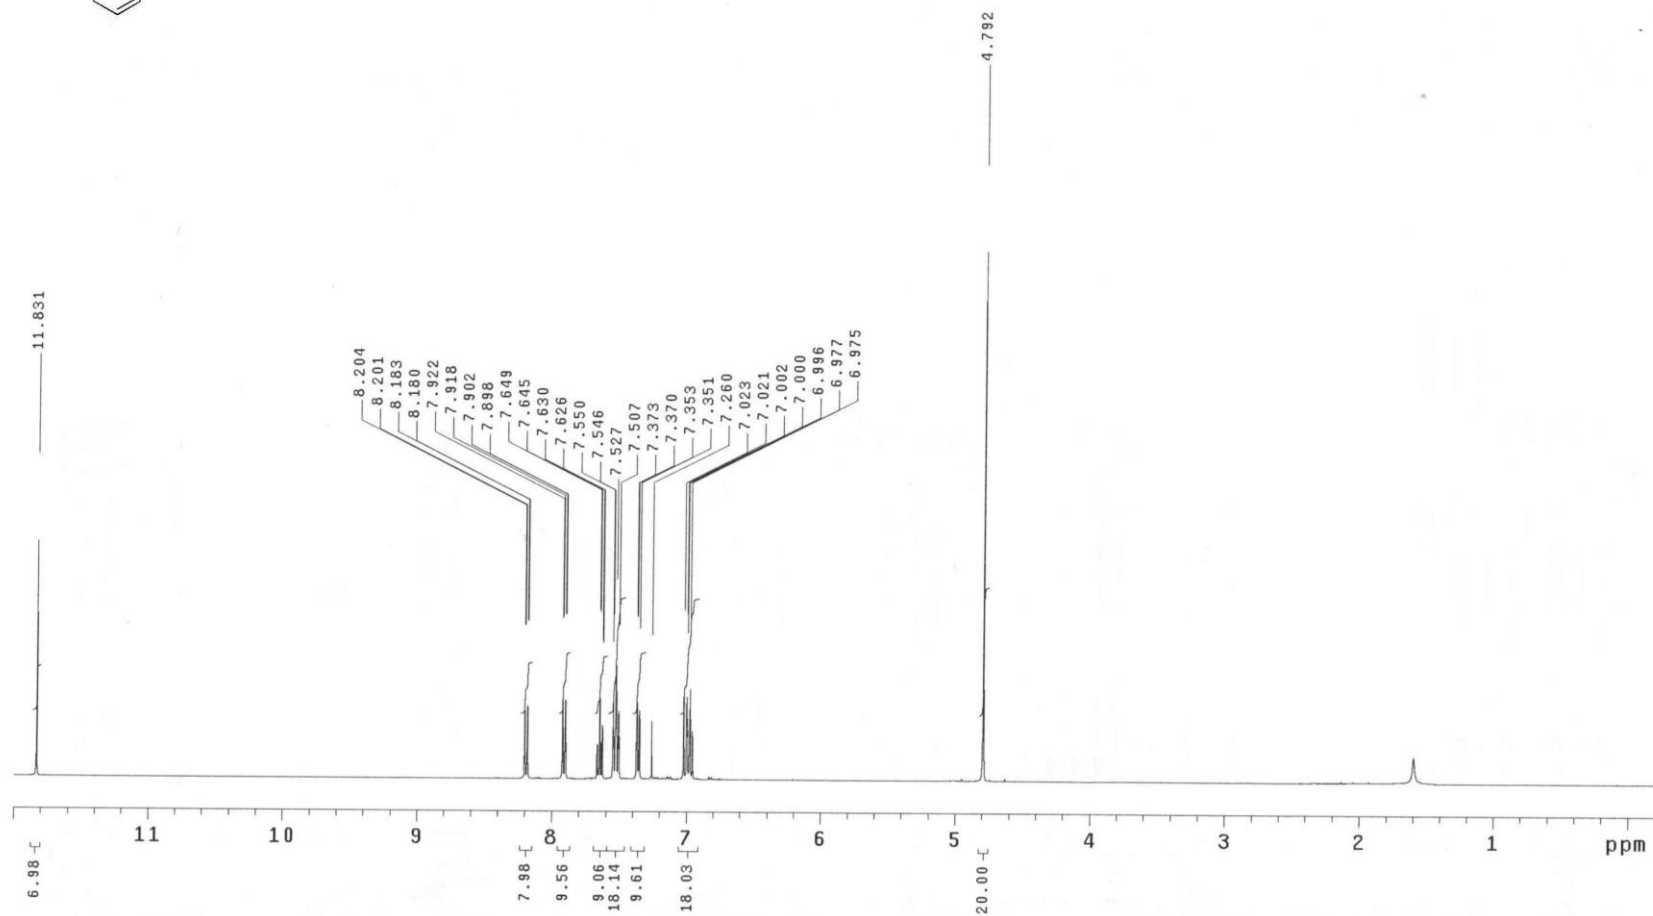

# Compound 9e (<sup>13</sup>C-NMR spectral data)

SHN02A1C13

Pulse Sequence: s2pu1

UNITYplus-400 "unity400"

Date: Aug 23 2018

Solvent: CDCl<sub>3</sub>

Ambient temperature

Total 480 repetitions

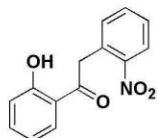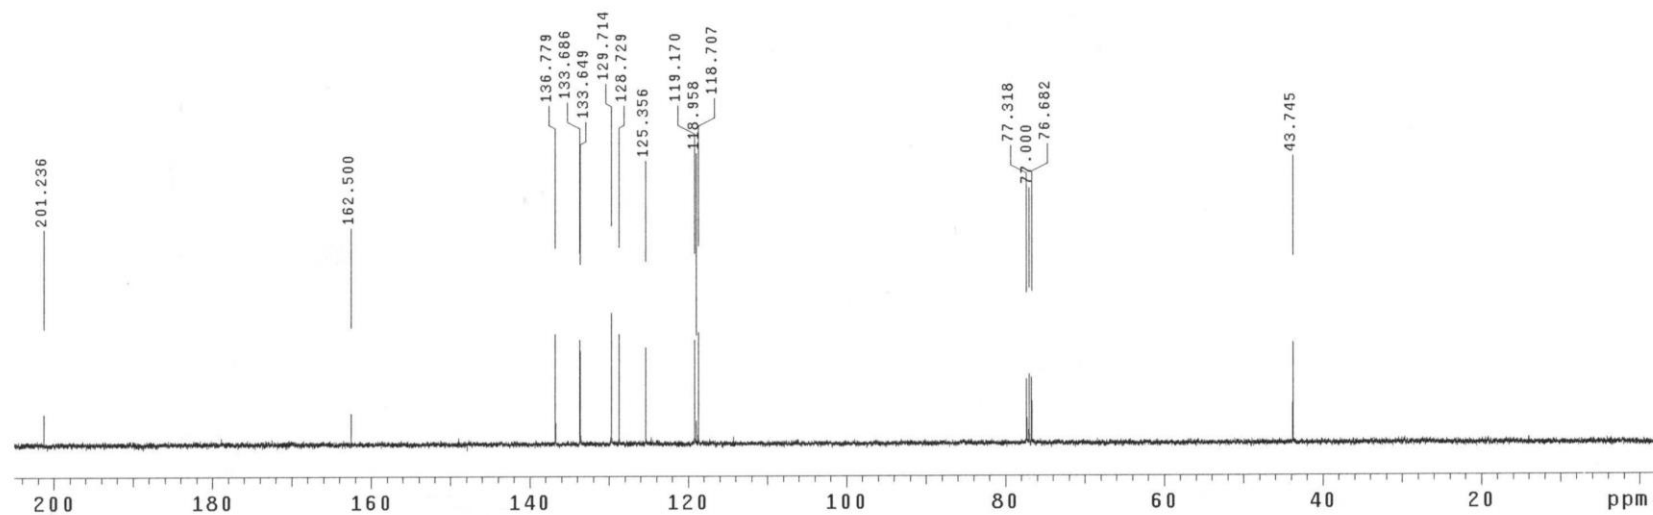



# Compound 10a (<sup>1</sup>H-NMR spectral data-1)

YTPHAC20

Pulse Sequence: s2pu1  
UNITYplus-400 "unity400"  
Date: Sep 11 2018  
Solvent: CDCl<sub>3</sub>  
Ambient temperature  
Total 32 repetitions

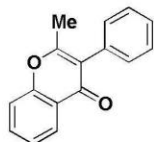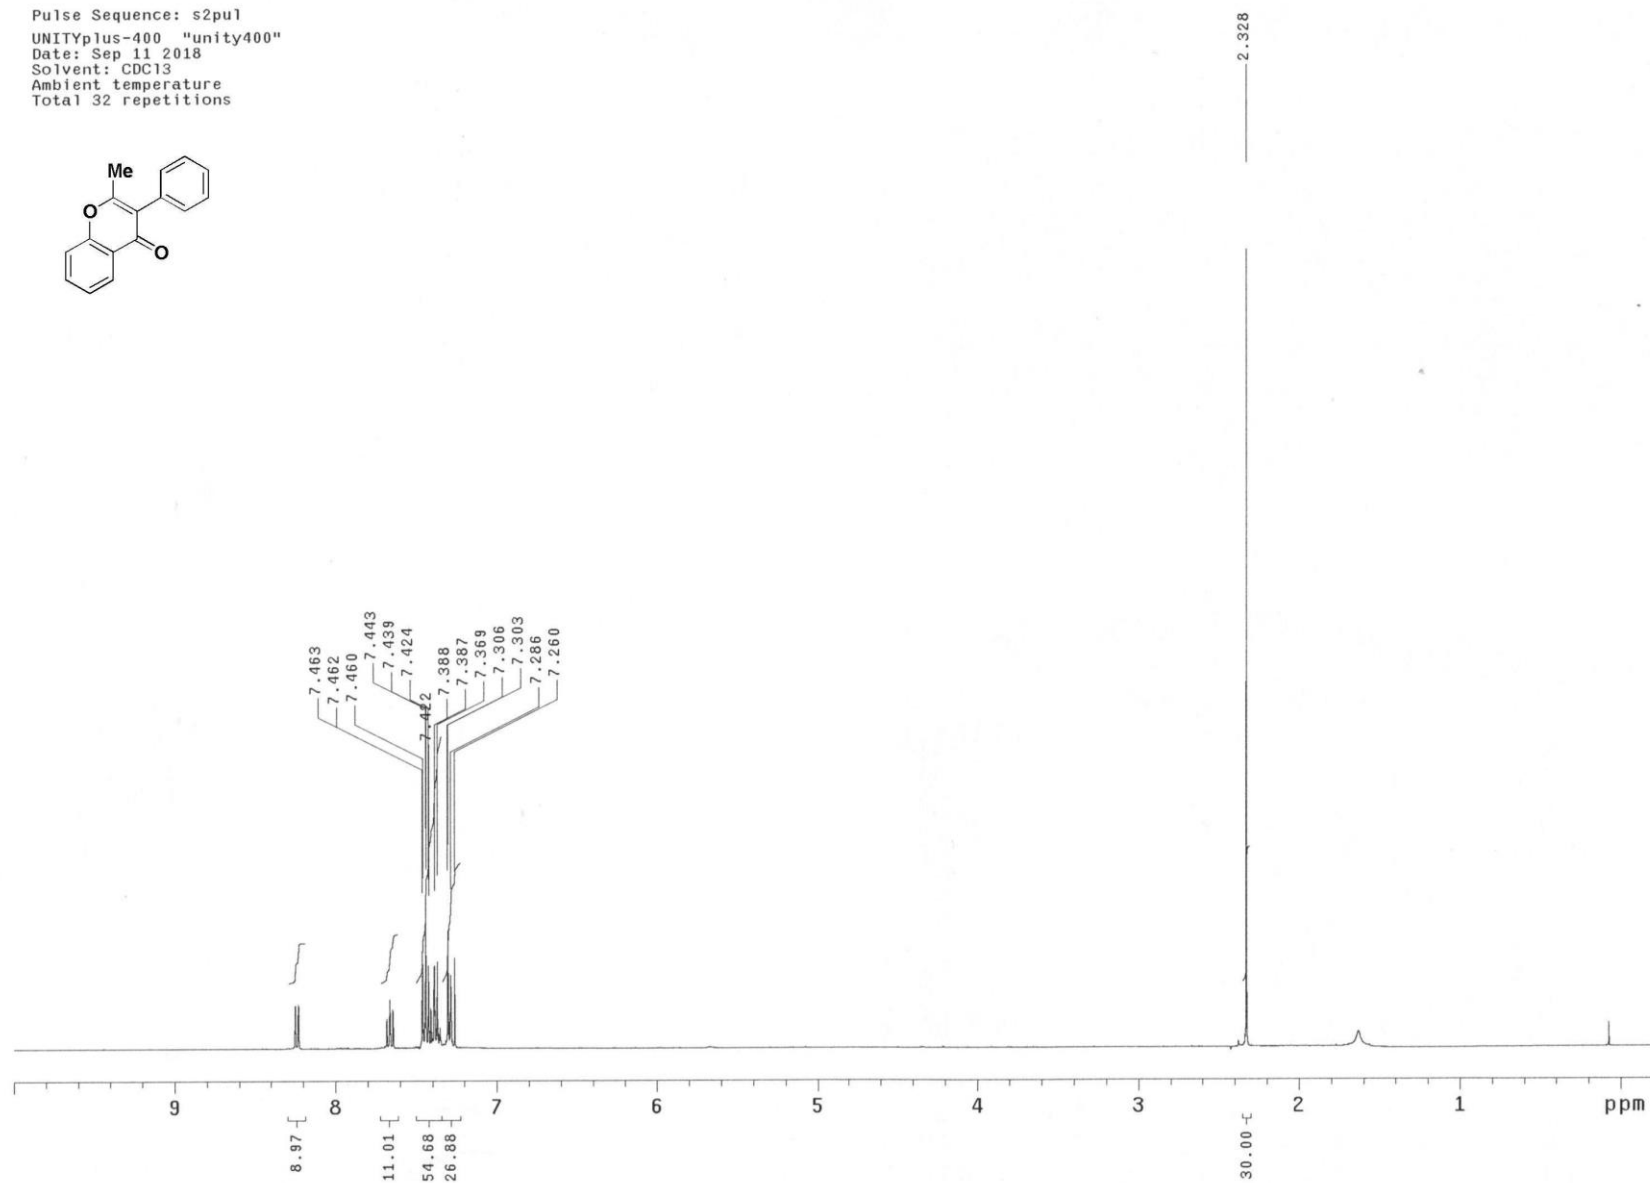

# Compound 10a (<sup>1</sup>H-NMR spectral data-2)

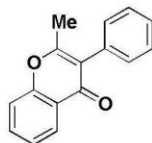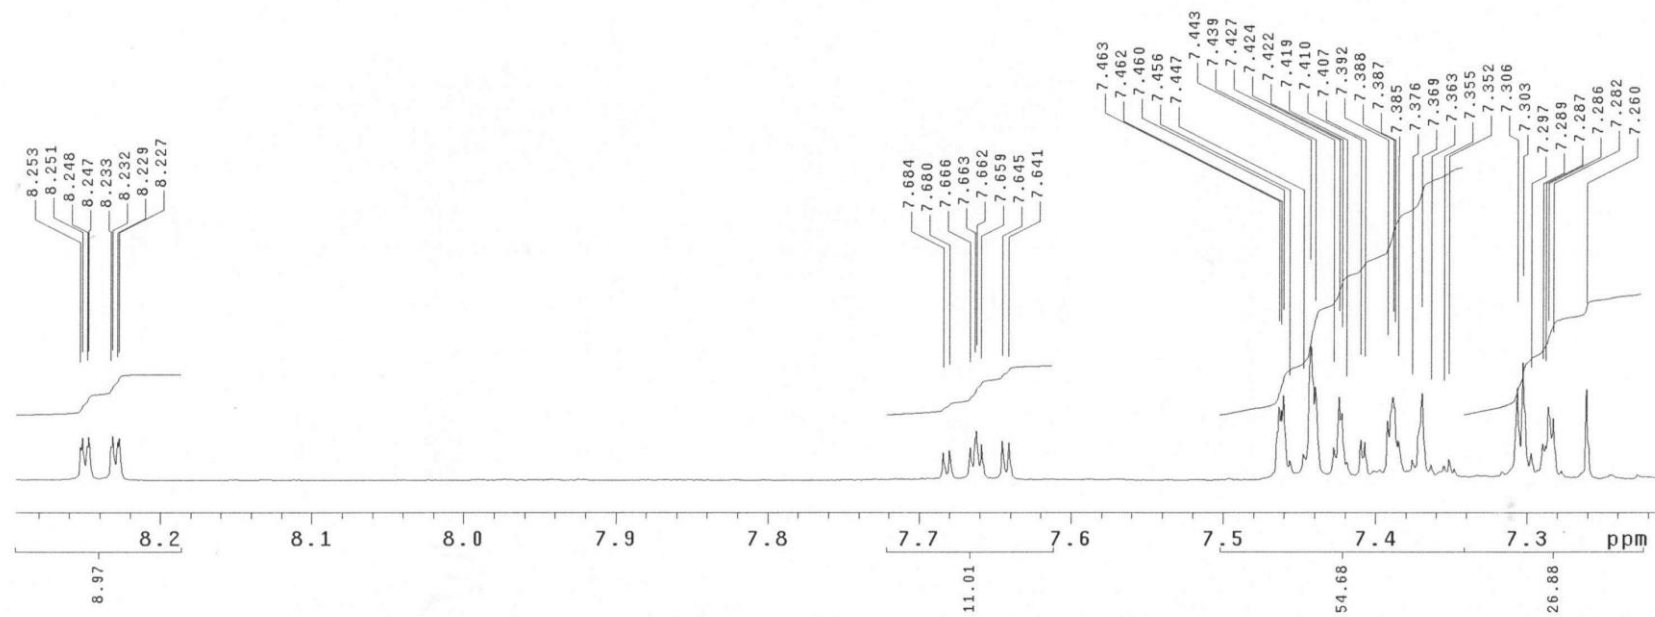

# Compound 10a (<sup>13</sup>C-NMR spectral data)

YTPHAC20

Pulse Sequence: s2pul

UNITYplus-400 "unity400"

Date: Sep 11 2018

Solvent: CDCl<sub>3</sub>

Ambient temperature

Total 2848 repetitions

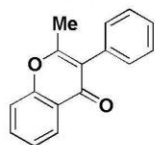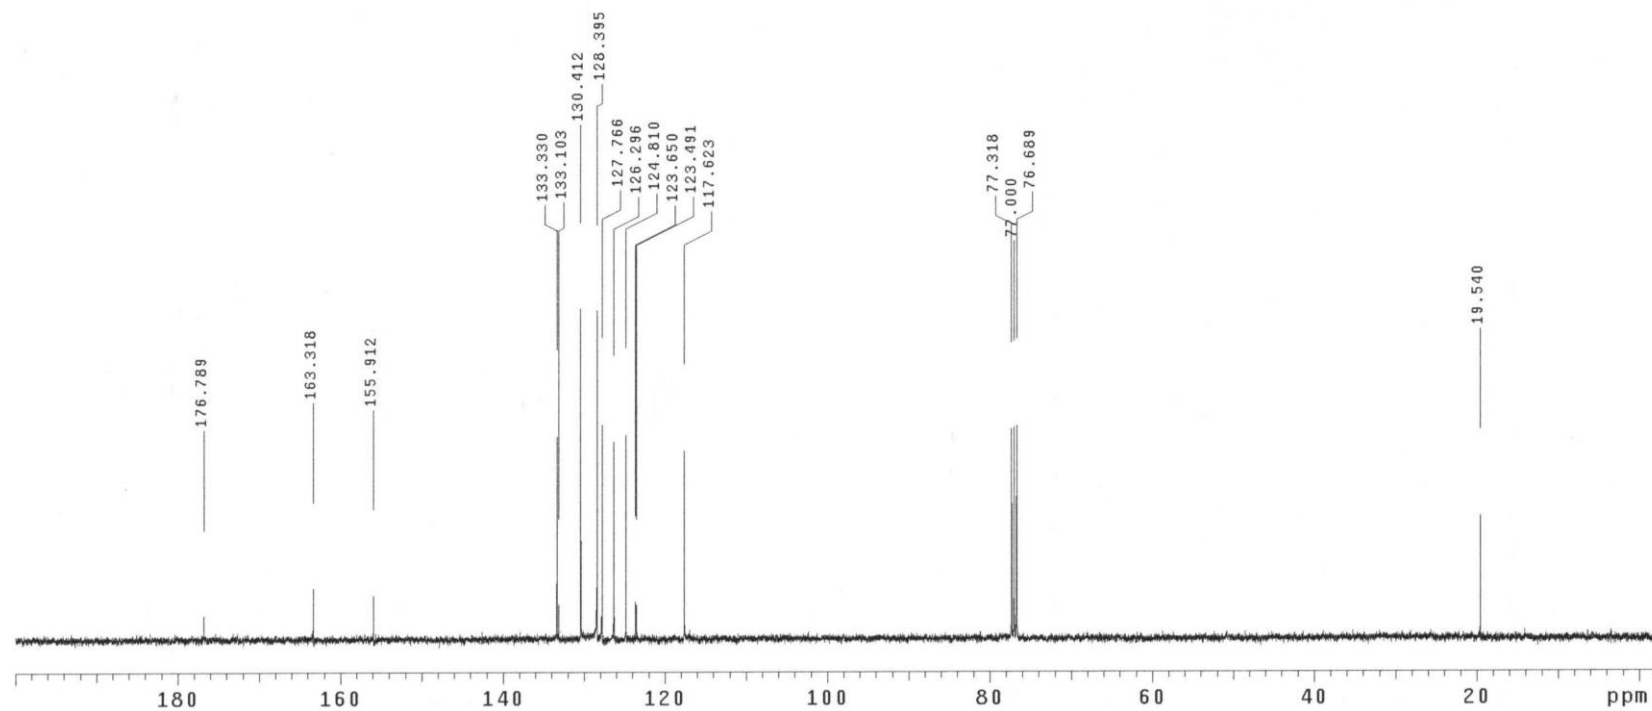

# Compound 10b (<sup>1</sup>H-NMR spectral data-1)

YTFAC20up

Pulse Sequence: s2pu1

UNITYplus-400 "unity400"

Date: Aug 6 2018

Solvent: CDCl<sub>3</sub>

Ambient temperature

Total 32 repetitions

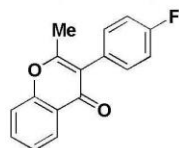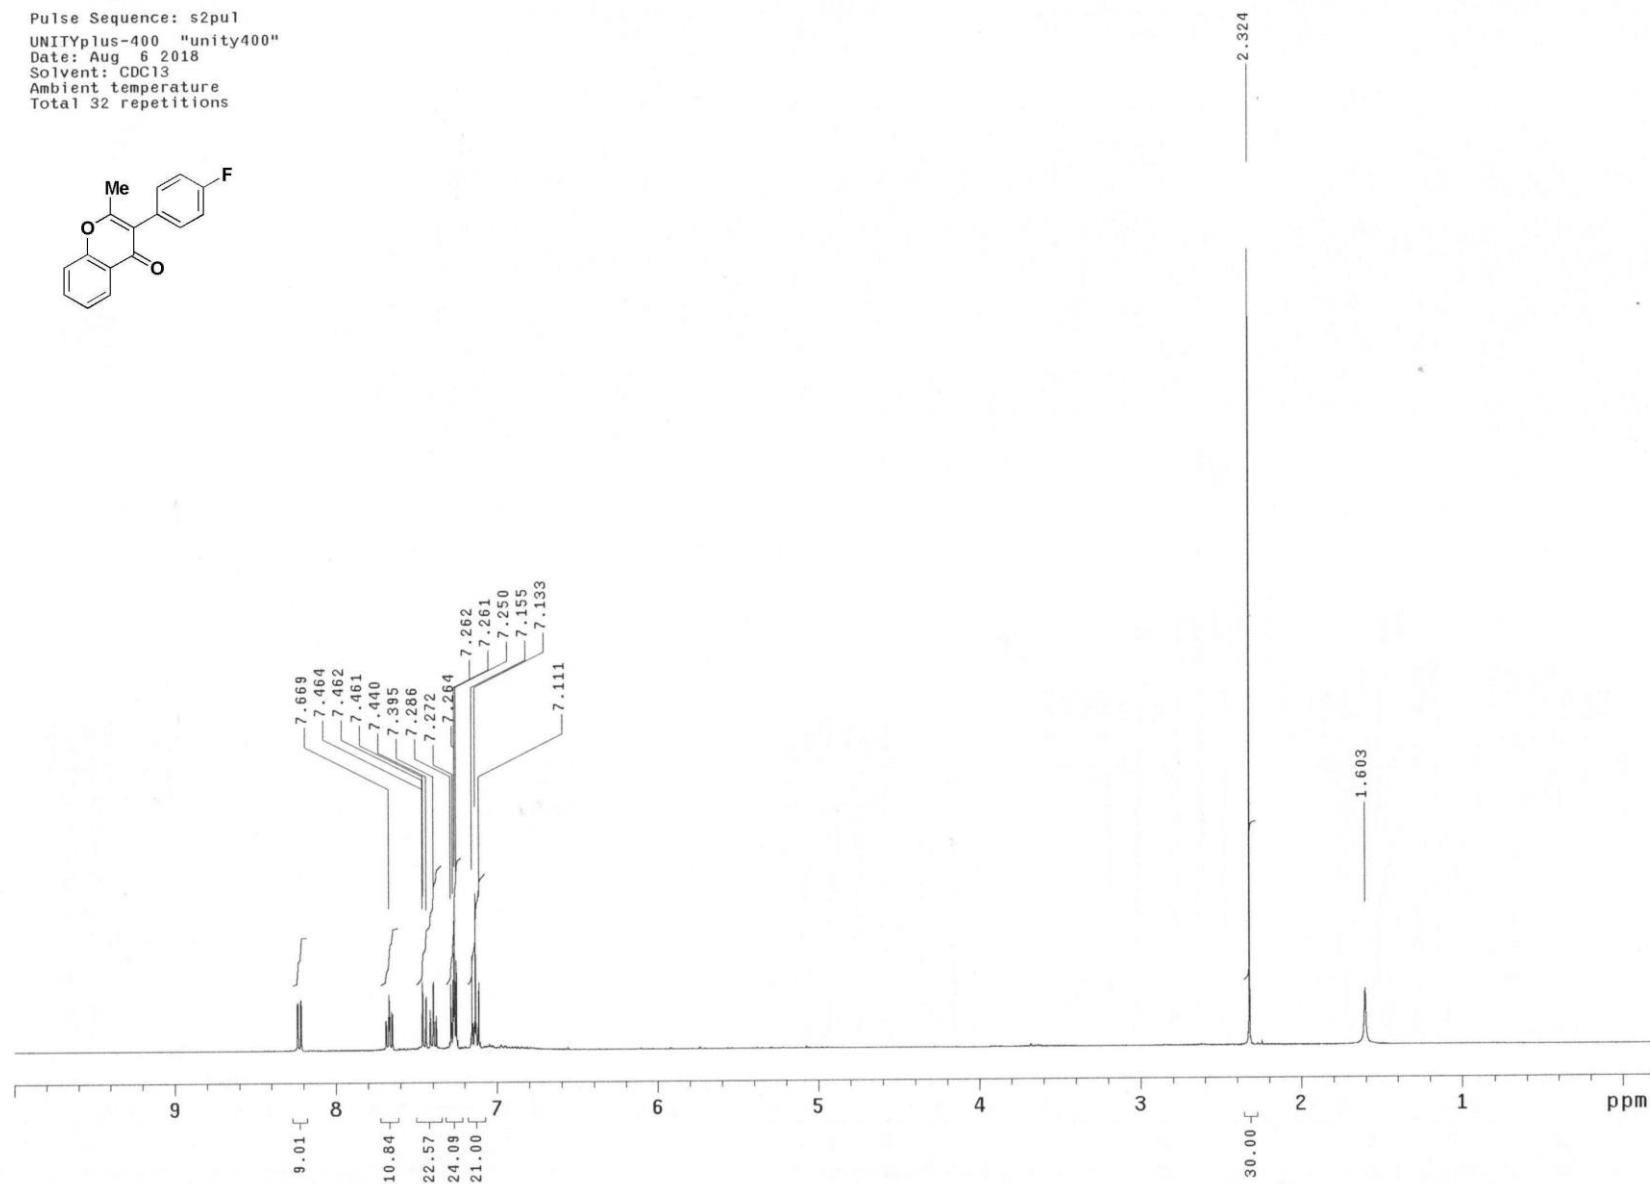

# Compound 10b (<sup>1</sup>H-NMR spectral data-2)

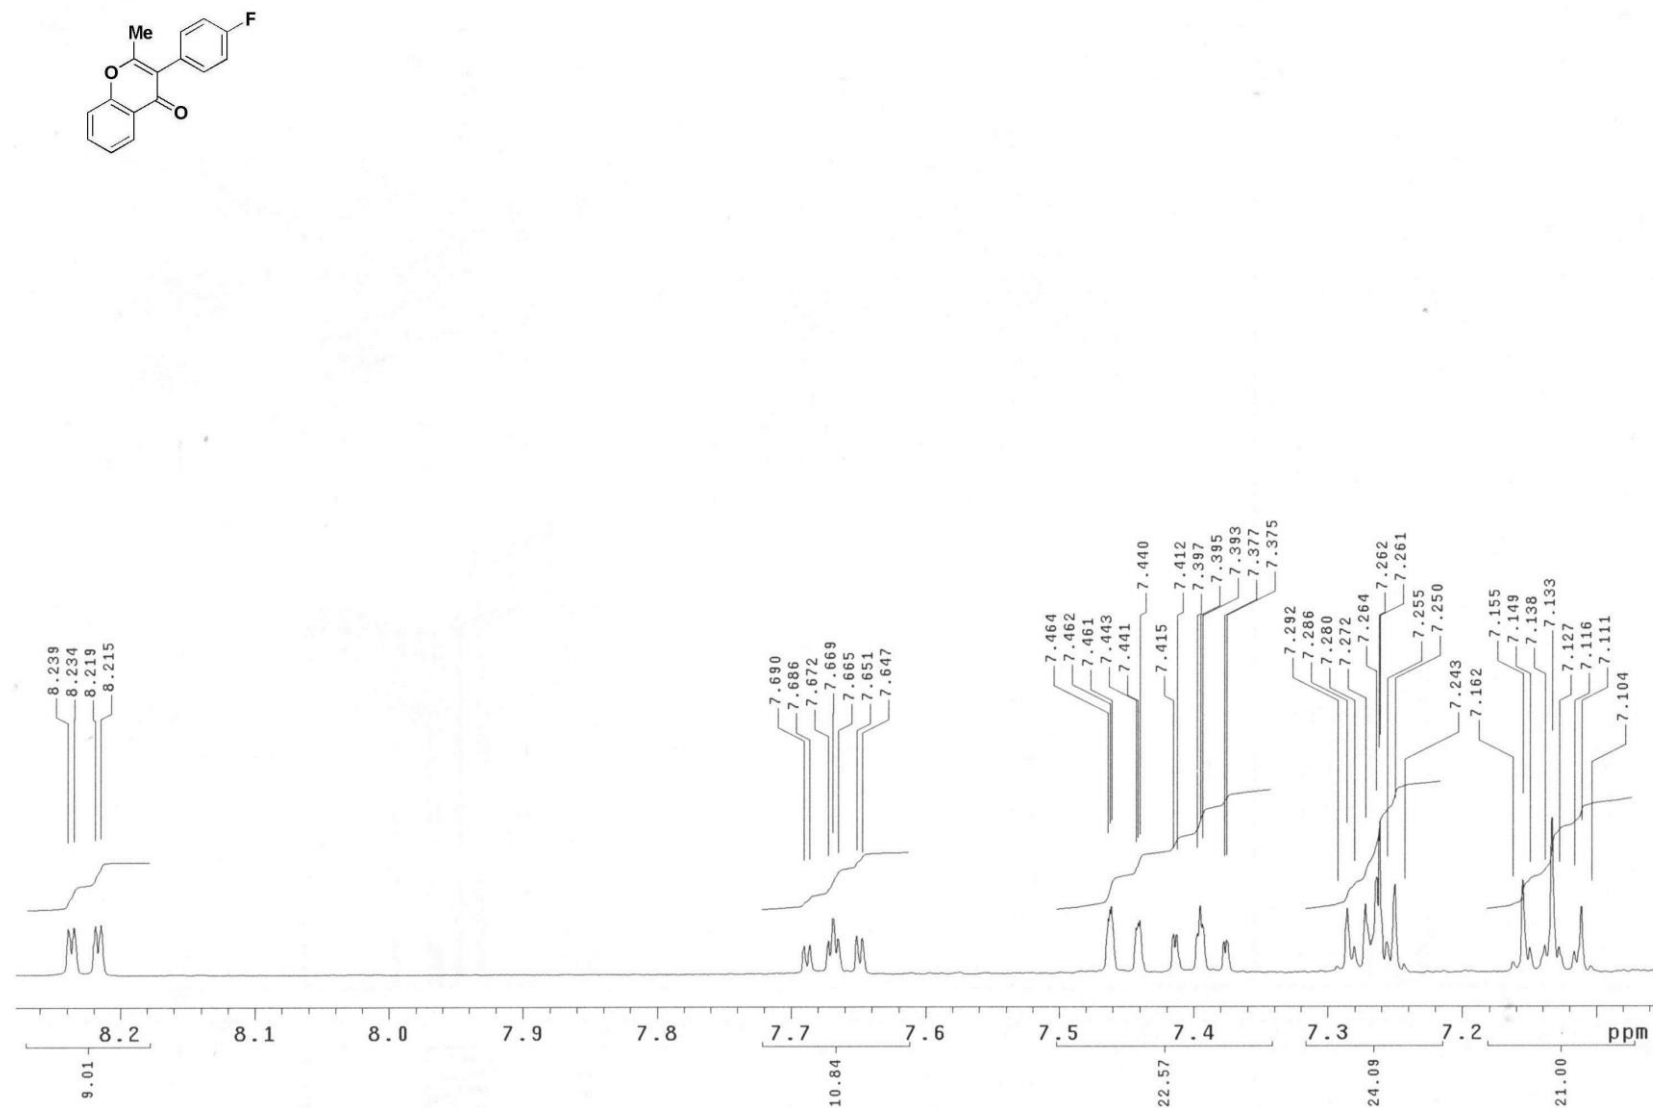

# Compound 10b (<sup>13</sup>C-NMR spectral data)

YTFAC20up

Pulse Sequence: s2pu1

UNITYplus-400 "unity400"

Date: Aug 6 2018

Solvent: CDCl<sub>3</sub>

Ambient temperature

Total 3504 repetitions

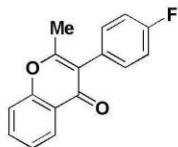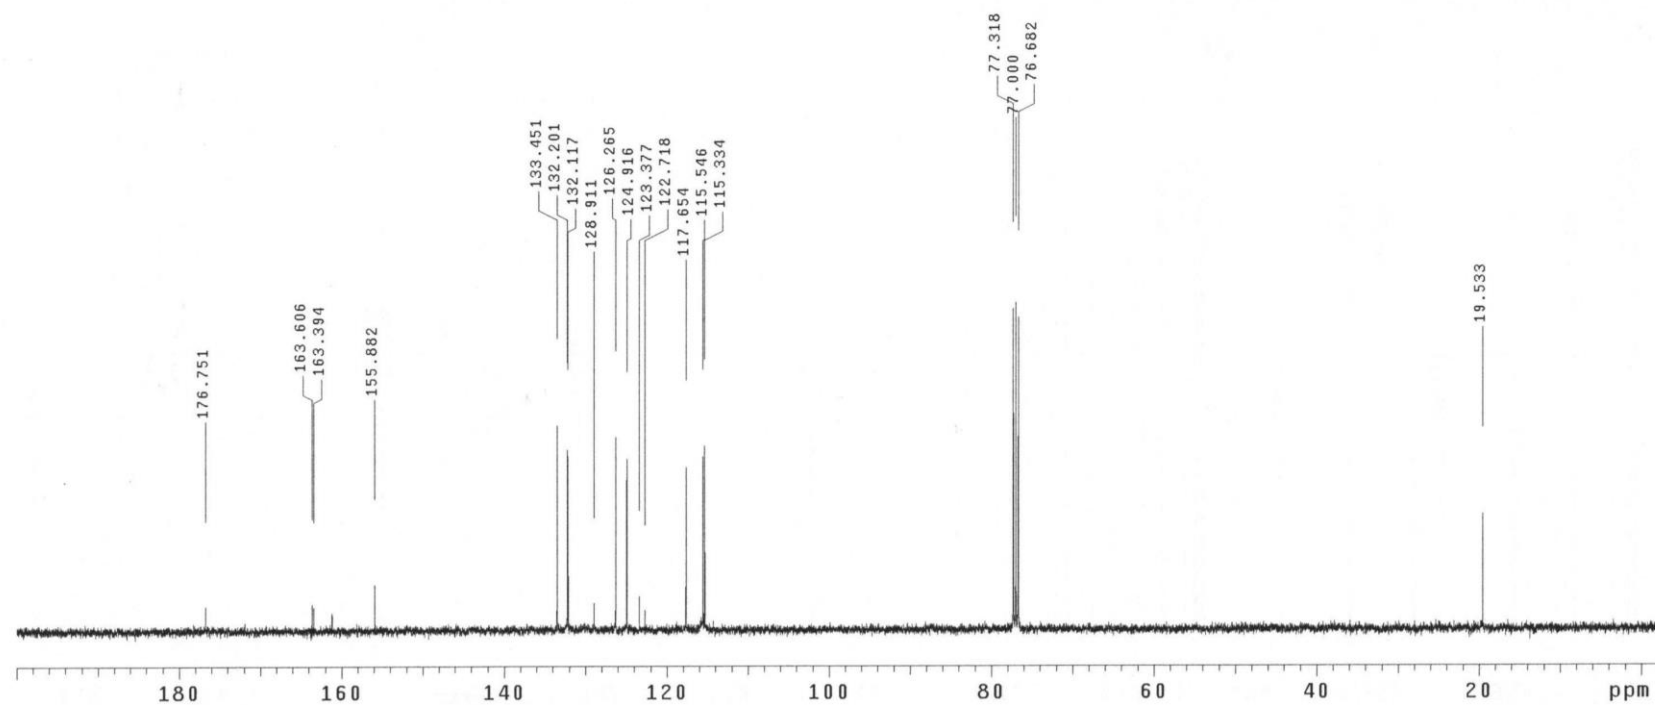

## YTB i PhAC20

Pulse Sequence: s2pu1

UNITYplus-400 "unity400"

Date: Sep 13 2018

Solvent: CDC13

Ambient temperature

Total 32 repetitions

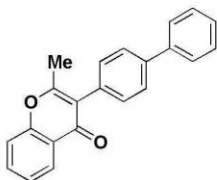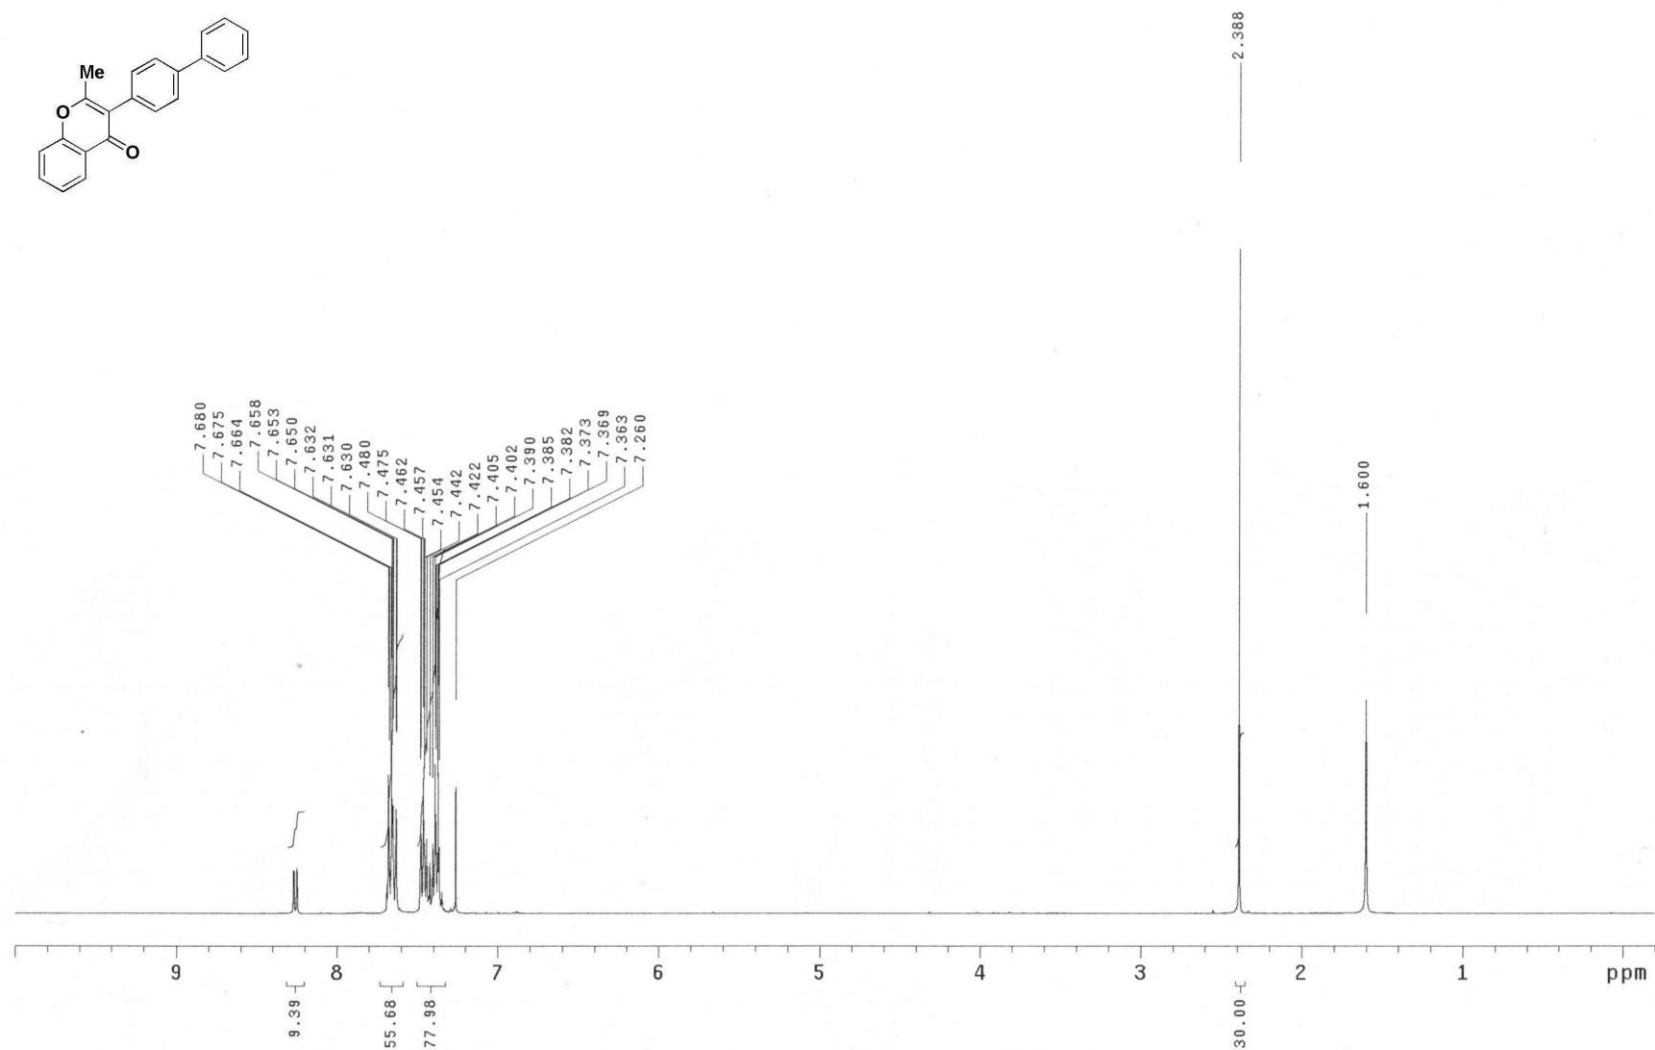

# Compound 10c (<sup>1</sup>H-NMR spectral data-2)

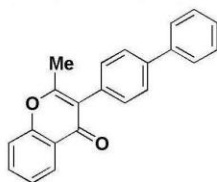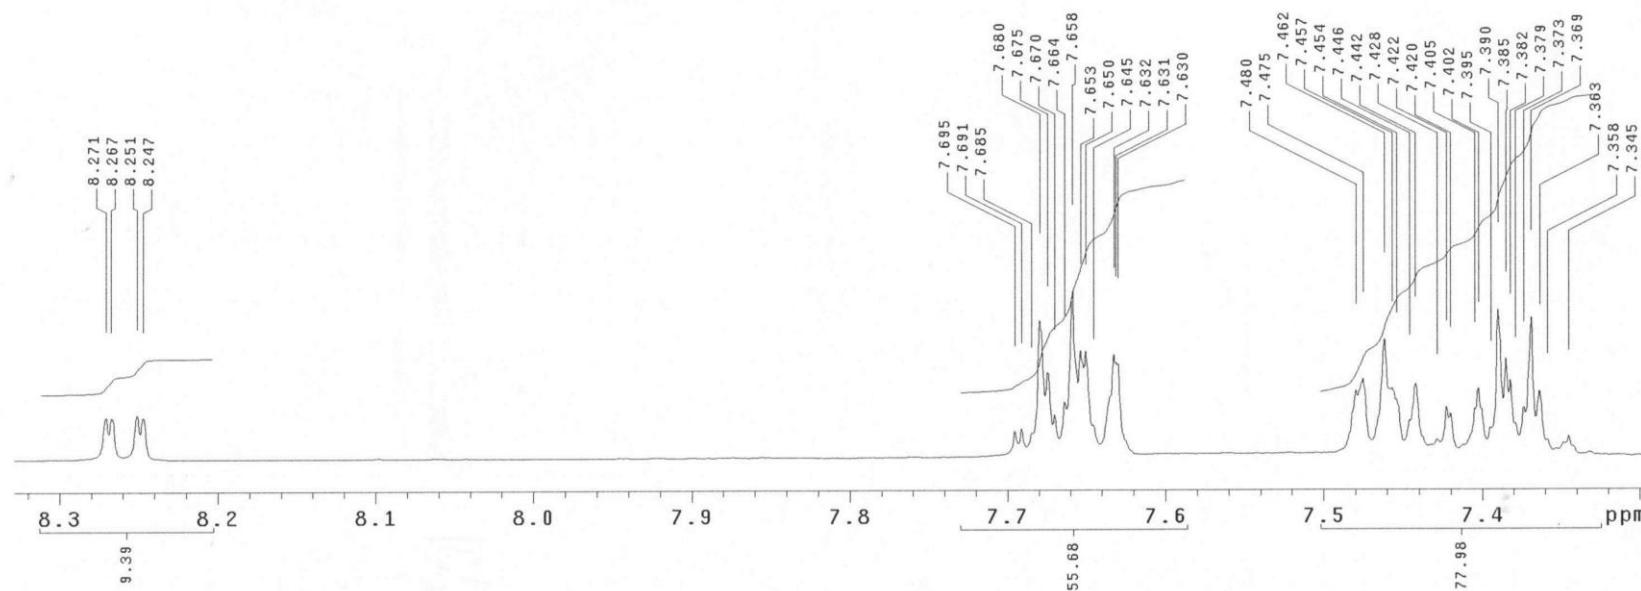



# Compound 10c ( $^{13}\text{C}$ -NMR spectral data)

YTBiPhAC20

Pulse Sequence: s2pu1

UNITYplus-400 "unity400"

Date: Sep 13 2018

Solvent: CDCl<sub>3</sub>

Ambient temperature

Total 4288 repetitions

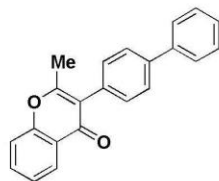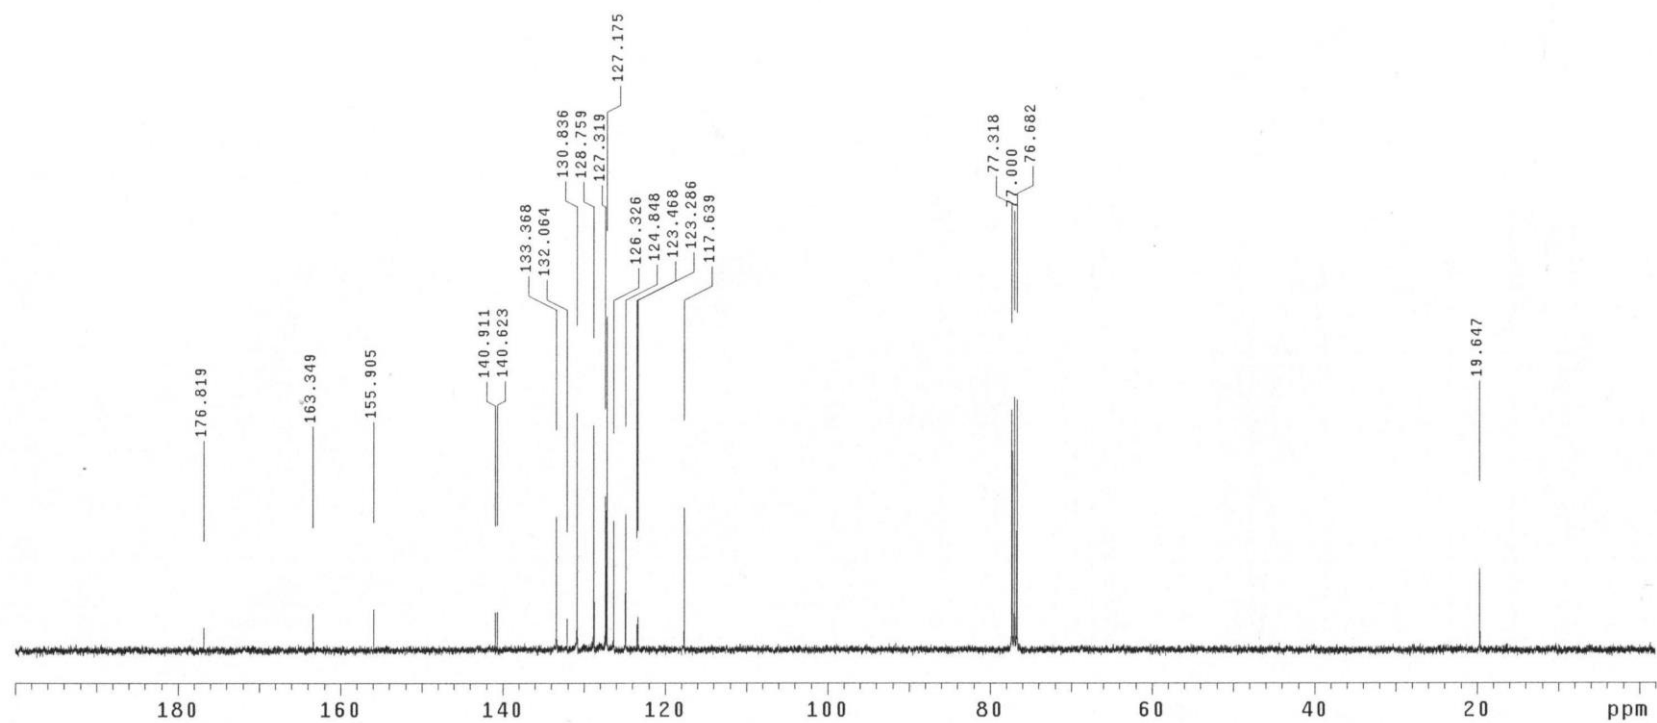

# Compound 12 (<sup>1</sup>H-NMR spectral data-1)

3H2-NAPh

Pulse Sequence: s2pu1

UNITYplus-400 "unity400"

Date: Jun 24 2019

Solvent: CDCl<sub>3</sub>

Ambient temperature

Total 32 repetitions

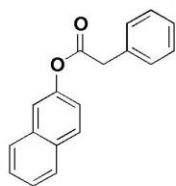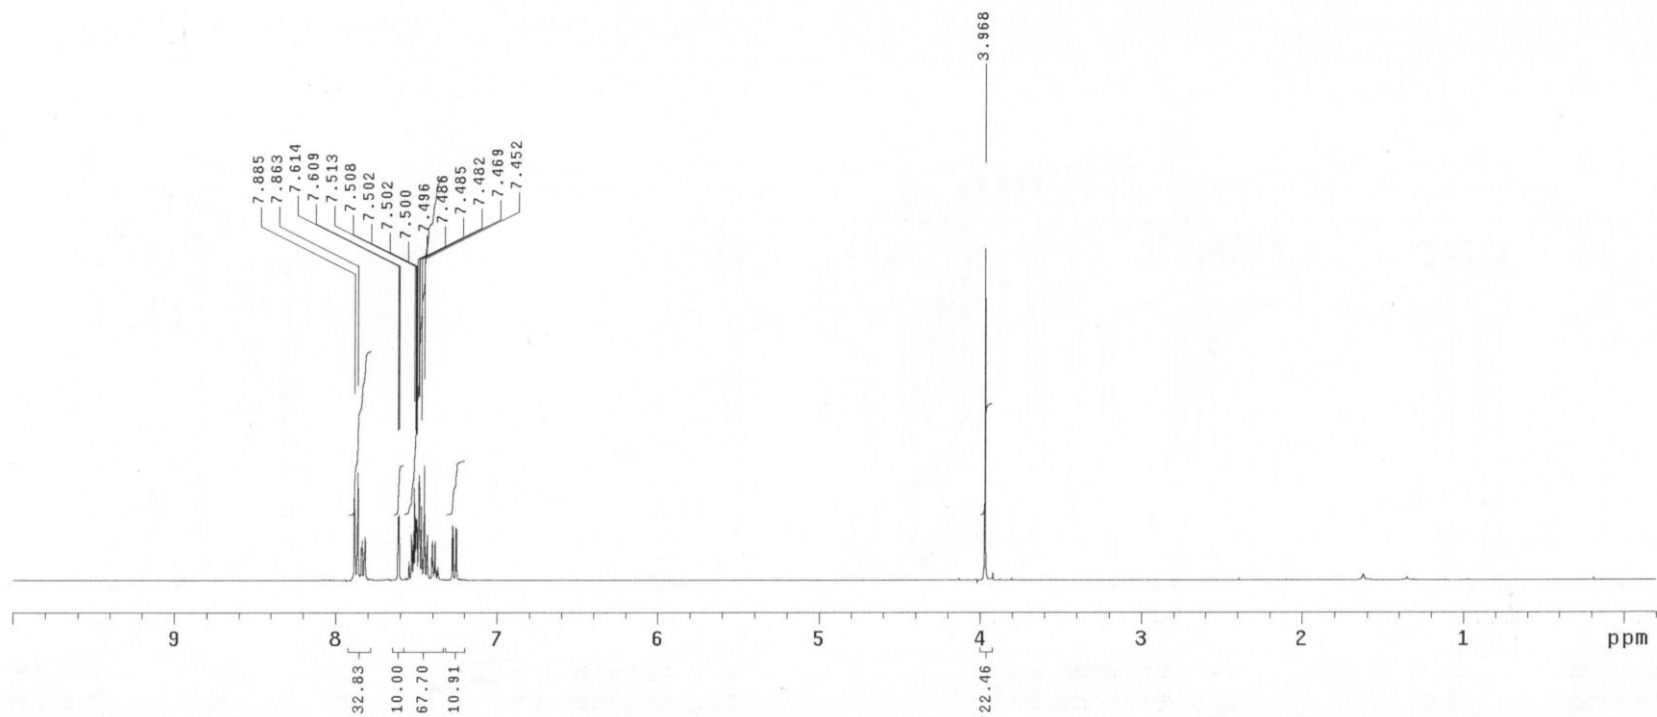

# Compound 12 (<sup>1</sup>H-NMR spectral data-2)

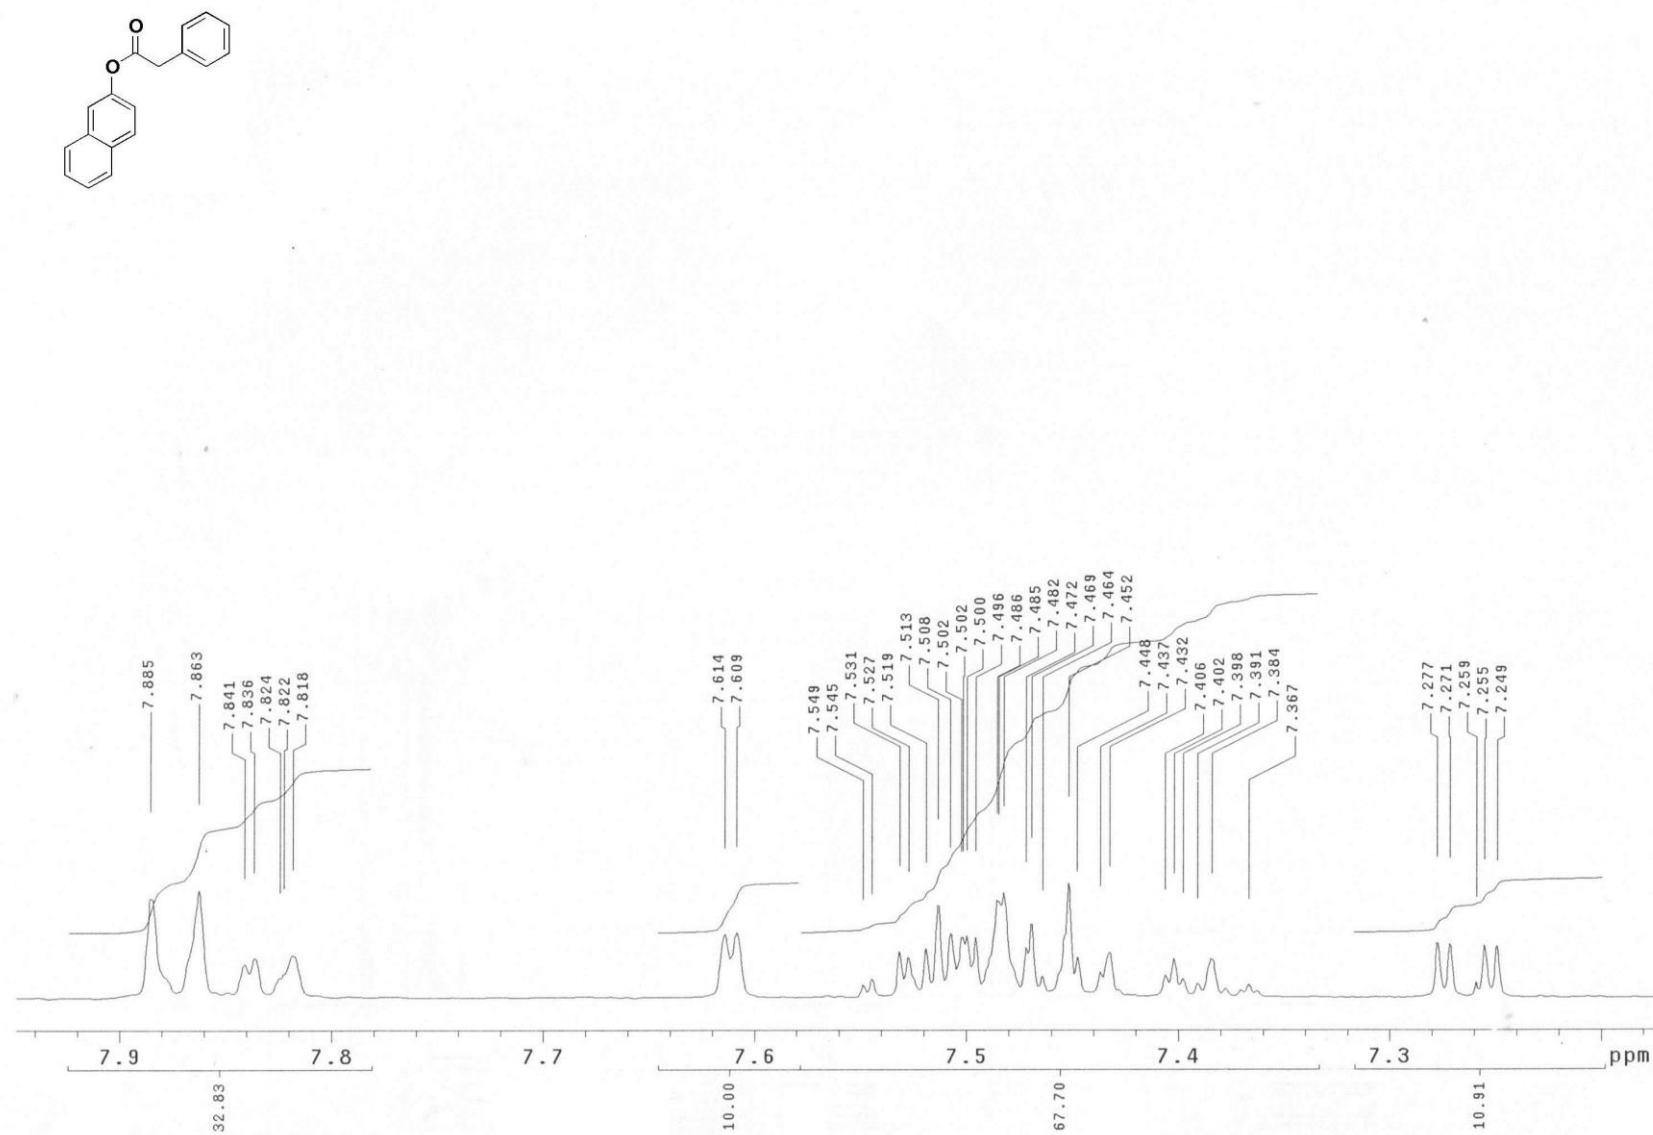

# Compound 12 (<sup>13</sup>C-NMR spectral data)

3H2-NAPh

Pulse Sequence: s2pul

UNITYplus-400 "unity400"

Date: Jun 24 2019

Solvent: CDCl<sub>3</sub>

Ambient temperature

Total 1024 repetitions

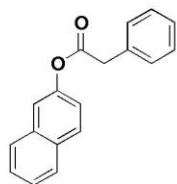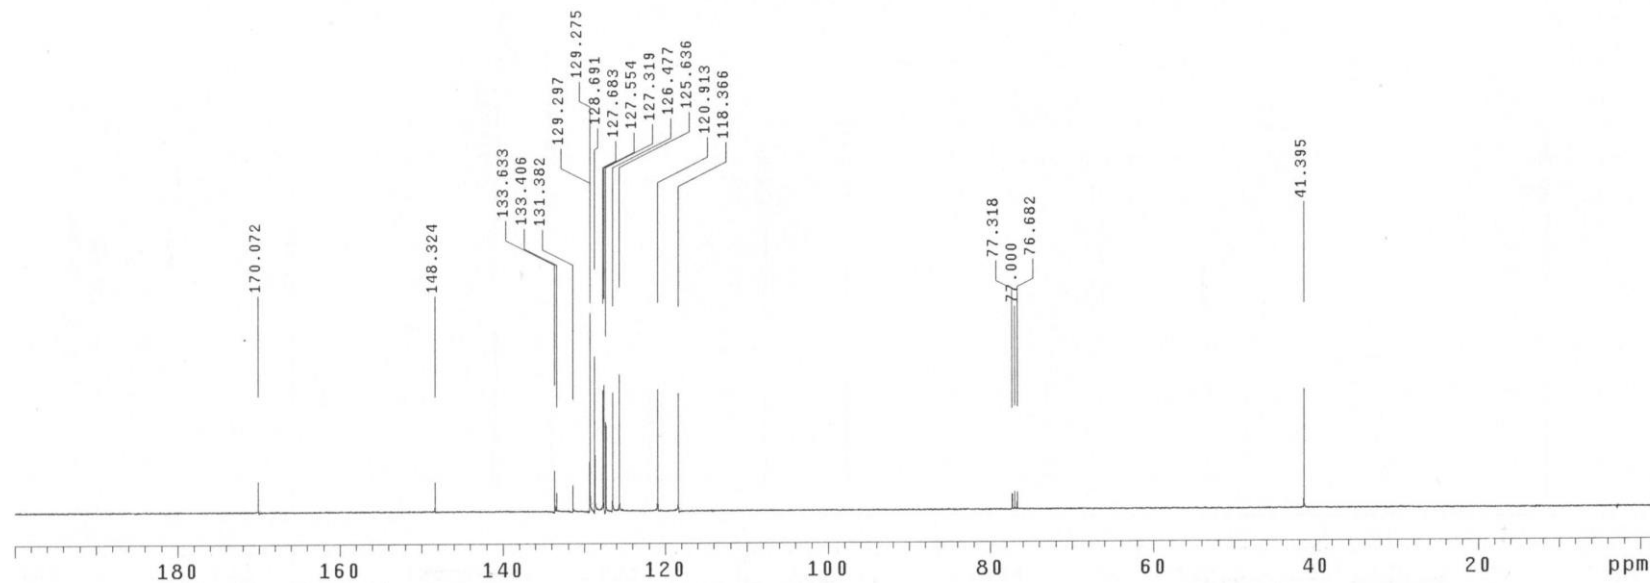

## X-ray crystal data of compound 4e (CCDC 1894542)

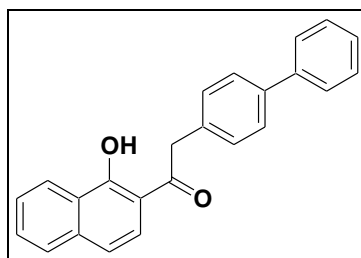

**Sample preparation** : A solution of compound **4e** (30 mg) in warm  $\text{CH}_2\text{Cl}_2$  (10 mL) was placed in a tube (10 mL). EtOAc (2 mL) was added slowly to the vial with a dropper. The vial was closed with little cotton and kept at room temperature for 2 days. Then, colorless prisms were observed.

**Crystal measurement** : X-ray crystal structures were determined with a Bruker Enraf-Nonius single-crystal diffractometer (CAD4, Kappa CCD). Thermal ellipsoids are drawn at 50% probability level.

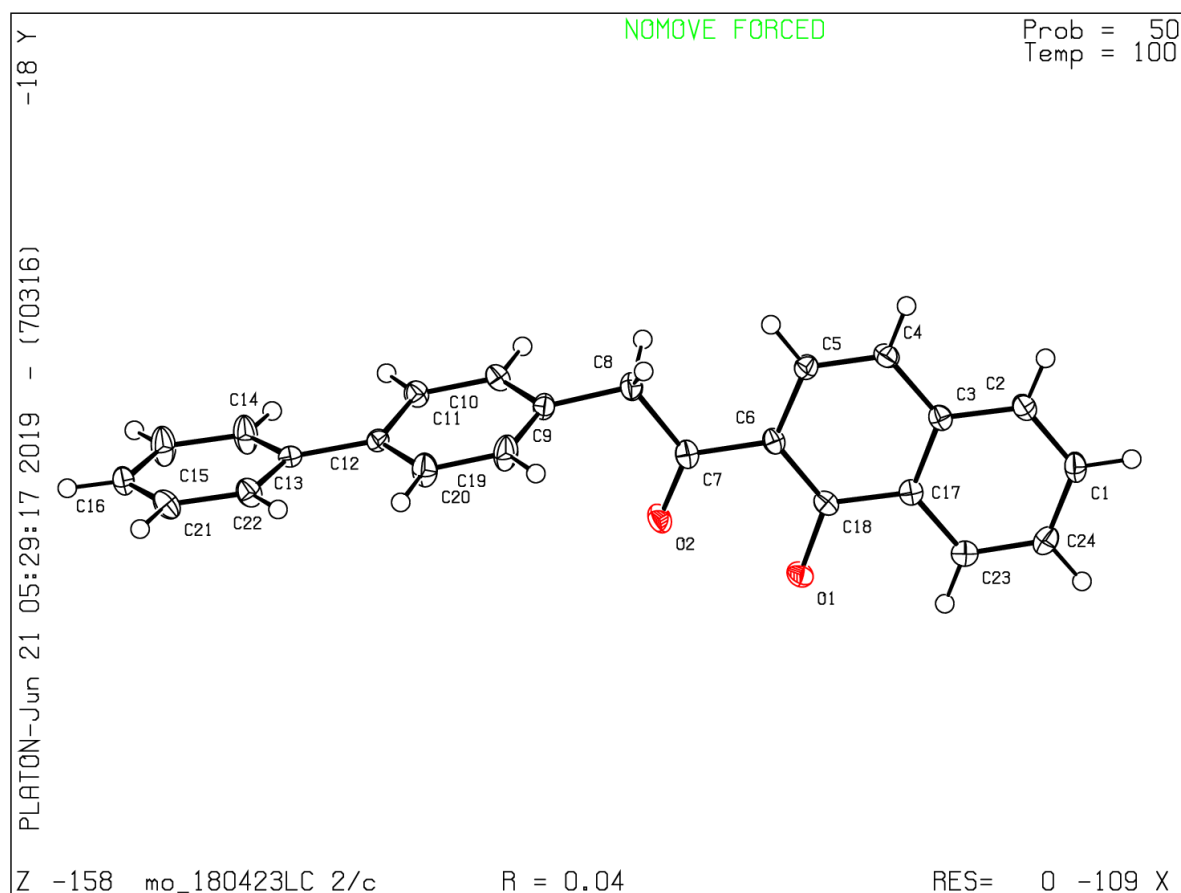

|                                   |                                                                                                          |
|-----------------------------------|----------------------------------------------------------------------------------------------------------|
| Empirical formula                 | C <sub>24</sub> H <sub>17</sub> O <sub>2</sub>                                                           |
| Formula weight                    | 337.37                                                                                                   |
| Temperature                       | 100(2) K                                                                                                 |
| Wavelength                        | 0.71073 Å                                                                                                |
| Crystal system                    | Monoclinic                                                                                               |
| Space group                       | C2/c                                                                                                     |
| Unit cell dimensions              | a = 25.037(5) Å      α = 90°.<br>b = 8.0888(15) Å      β = 118.618(5)°.<br>c = 19.202(3) Å      γ = 90°. |
| Volume                            | 3413.6(11) Å <sup>3</sup>                                                                                |
| Z                                 | 8                                                                                                        |
| Density (calculated)              | 1.313 Mg/m <sup>3</sup>                                                                                  |
| Absorption coefficient            | 0.082 mm <sup>-1</sup>                                                                                   |
| F(000)                            | 1416                                                                                                     |
| Crystal size                      | 0.25 x 0.23 x 0.19 mm <sup>3</sup>                                                                       |
| Theta range for data collection   | 1.853 to 26.536°.                                                                                        |
| Index ranges                      | -31 ≤ h ≤ 31, -10 ≤ k ≤ 10, -21 ≤ l ≤ 24                                                                 |
| Reflections collected             | 24471                                                                                                    |
| Independent reflections           | 3514 [R(int) = 0.0306]                                                                                   |
| Completeness to theta = 25.242°   | 99.8 %                                                                                                   |
| Absorption correction             | Semi-empirical from equivalents                                                                          |
| Max. and min. transmission        | 0.9485 and 0.9108                                                                                        |
| Refinement method                 | Full-matrix least-squares on F <sup>2</sup>                                                              |
| Data / restraints / parameters    | 3514 / 0 / 235                                                                                           |
| Goodness-of-fit on F <sup>2</sup> | 1.038                                                                                                    |
| Final R indices [I > 2σ(I)]       | R1 = 0.0430, wR2 = 0.1219                                                                                |
| R indices (all data)              | R1 = 0.0536, wR2 = 0.1327                                                                                |
| Extinction coefficient            | n/a                                                                                                      |
| Largest diff. peak and hole       | 0.717 and -0.220 e.Å <sup>-3</sup>                                                                       |

## X-ray crystal data of compound 4h (CCDC 1894541)

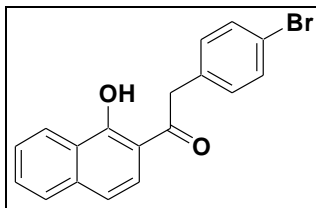

**Sample preparation** : A solution of compound **4h** (30 mg) in warm  $\text{CH}_2\text{Cl}_2$  (10 mL) was placed in a tube (10 mL). EtOAc (2 mL) was added slowly to the vial with a dropper. The vial was closed with little cotton and kept at room temperature for 2 days. Then, colorless prisms were observed.

**Crystal measurement** : X-ray crystal structures were determined with a Bruker Enraf-Nonius single-crystal diffractometer (CAD4, Kappa CCD). Thermal ellipsoids are drawn at 50% probability level.

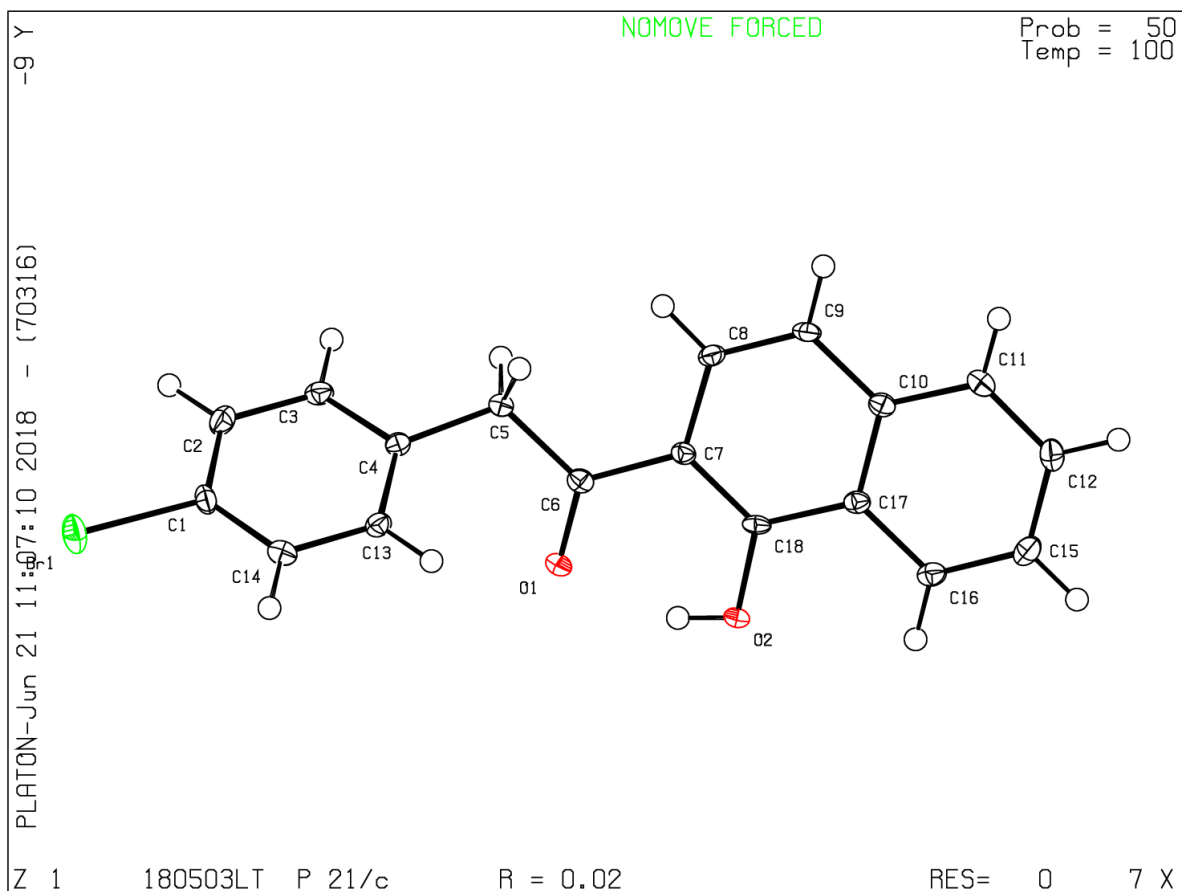

|                                   |                                                                                                             |
|-----------------------------------|-------------------------------------------------------------------------------------------------------------|
| Empirical formula                 | C <sub>18</sub> H <sub>13</sub> Br O <sub>2</sub>                                                           |
| Formula weight                    | 341.19                                                                                                      |
| Temperature                       | 100(2) K                                                                                                    |
| Wavelength                        | 0.71073 Å                                                                                                   |
| Crystal system                    | Monoclinic                                                                                                  |
| Space group                       | P 21/c                                                                                                      |
| Unit cell dimensions              | a = 16.3545(7) Å      α = 90°.<br>b = 11.9821(5) Å      β = 100.2100(10)°.<br>c = 7.3657(3) Å      γ = 90°. |
| Volume                            | 1420.53(10) Å <sup>3</sup>                                                                                  |
| Z                                 | 4                                                                                                           |
| Density (calculated)              | 1.595 Mg/m <sup>3</sup>                                                                                     |
| Absorption coefficient            | 2.895 mm <sup>-1</sup>                                                                                      |
| F(000)                            | 688                                                                                                         |
| Crystal size                      | 0.15 x 0.13 x 0.12 mm <sup>3</sup>                                                                          |
| Theta range for data collection   | 1.265 to 26.419°.                                                                                           |
| Index ranges                      | -20 ≤ h ≤ 20, -14 ≤ k ≤ 14, -8 ≤ l ≤ 9                                                                      |
| Reflections collected             | 24966                                                                                                       |
| Independent reflections           | 2924 [R(int) = 0.0294]                                                                                      |
| Completeness to theta = 25.242°   | 100.0 %                                                                                                     |
| Absorption correction             | Semi-empirical from equivalents                                                                             |
| Max. and min. transmission        | 0.9485 and 0.8032                                                                                           |
| Refinement method                 | Full-matrix least-squares on F <sup>2</sup>                                                                 |
| Data / restraints / parameters    | 2924 / 0 / 193                                                                                              |
| Goodness-of-fit on F <sup>2</sup> | 1.077                                                                                                       |
| Final R indices [I > 2σ(I)]       | R1 = 0.0231, wR2 = 0.0592                                                                                   |
| R indices (all data)              | R1 = 0.0284, wR2 = 0.0632                                                                                   |
| Extinction coefficient            | n/a                                                                                                         |
| Largest diff. peak and hole       | 0.462 and -0.434 e.Å <sup>-3</sup>                                                                          |



## X-ray crystal data of compound 5a (CCDC 1894548)

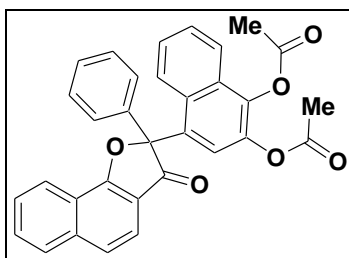

**Sample preparation :** A solution of compound **5a** (30 mg) in warm CH<sub>2</sub>Cl<sub>2</sub> (10 mL) was placed in a tube (10 mL). EtOAc (2 mL) was added slowly to the vial with a dropper. The vial was closed with little cotton and kept at room temperature for 2 days. Then, colorless prisms were observed.

**Crystal measurement :** X-ray crystal structures were determined with a Bruker Enraf-Nonius single-crystal diffractometer (CAD4, Kappa CCD). Thermal ellipsoids are drawn at 50% probability level.

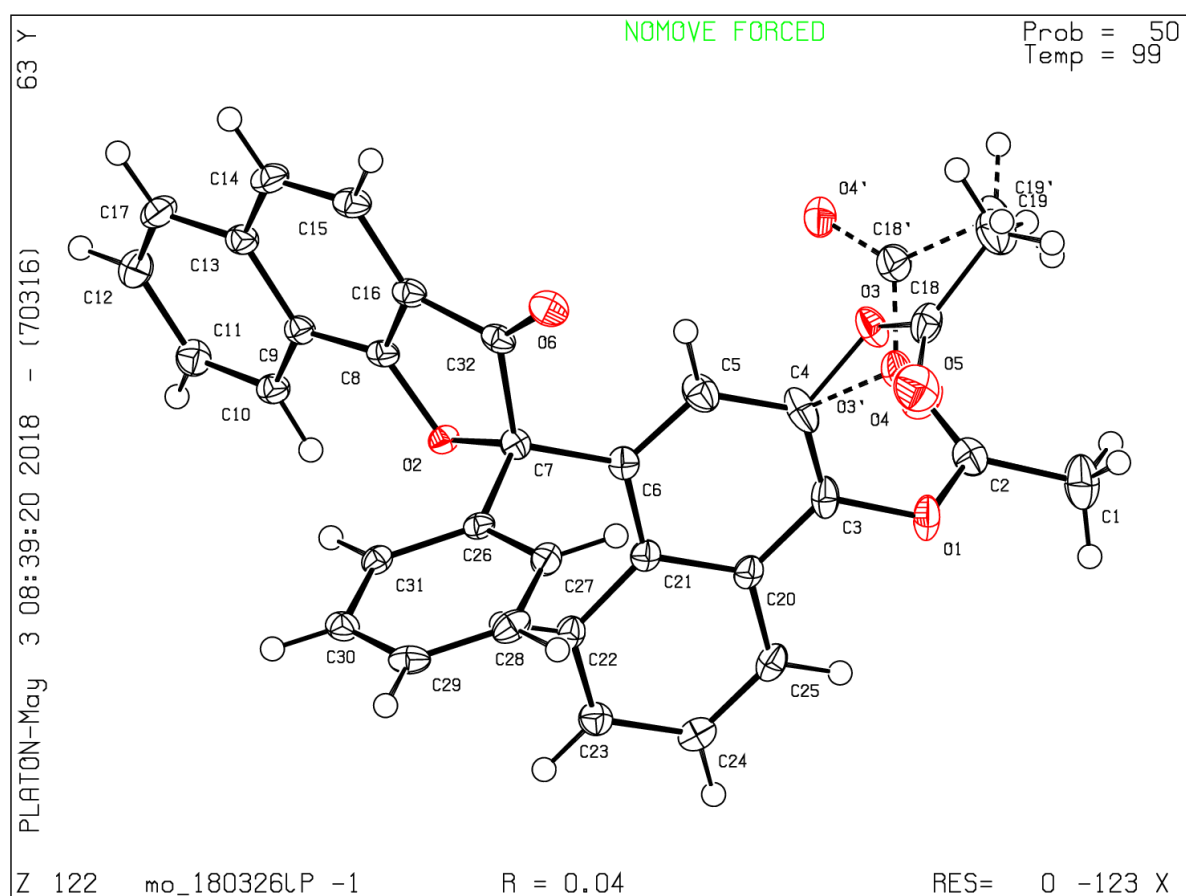

|                                   |                                                                                                                        |
|-----------------------------------|------------------------------------------------------------------------------------------------------------------------|
| Empirical formula                 | C <sub>32</sub> H <sub>22</sub> O <sub>6</sub>                                                                         |
| Formula weight                    | 502.49                                                                                                                 |
| Temperature                       | 99(2) K                                                                                                                |
| Wavelength                        | 0.71073 Å                                                                                                              |
| Crystal system                    | Triclinic                                                                                                              |
| Space group                       | P -1                                                                                                                   |
| Unit cell dimensions              | a = 8.1280(4) Å      α = 84.715(2)°.<br>b = 10.6123(6) Å      β = 79.253(2)°.<br>c = 14.7375(8) Å      γ = 75.963(2)°. |
| Volume                            | 1210.15(11) Å <sup>3</sup>                                                                                             |
| Z                                 | 2                                                                                                                      |
| Density (calculated)              | 1.379 Mg/m <sup>3</sup>                                                                                                |
| Absorption coefficient            | 0.095 mm <sup>-1</sup>                                                                                                 |
| F(000)                            | 524                                                                                                                    |
| Crystal size                      | 0.28 x 0.25 x 0.23 mm <sup>3</sup>                                                                                     |
| Theta range for data collection   | 1.408 to 26.527°.                                                                                                      |
| Index ranges                      | -10 ≤ h ≤ 9, -13 ≤ k ≤ 13, -18 ≤ l ≤ 18                                                                                |
| Reflections collected             | 29726                                                                                                                  |
| Independent reflections           | 5023 [R(int) = 0.0436]                                                                                                 |
| Completeness to theta = 25.242°   | 100.0 %                                                                                                                |
| Absorption correction             | Semi-empirical from equivalents                                                                                        |
| Max. and min. transmission        | 0.9485 and 0.8979                                                                                                      |
| Refinement method                 | Full-matrix least-squares on F <sup>2</sup>                                                                            |
| Data / restraints / parameters    | 5023 / 108 / 383                                                                                                       |
| Goodness-of-fit on F <sup>2</sup> | 1.041                                                                                                                  |
| Final R indices [I > 2σ(I)]       | R1 = 0.0438, wR2 = 0.0998                                                                                              |
| R indices (all data)              | R1 = 0.0577, wR2 = 0.1079                                                                                              |
| Extinction coefficient            | n/a                                                                                                                    |
| Largest diff. peak and hole       | 0.380 and -0.376 e.Å <sup>-3</sup>                                                                                     |

## X-ray crystal data of compound **5g** (CCDC 1894543)

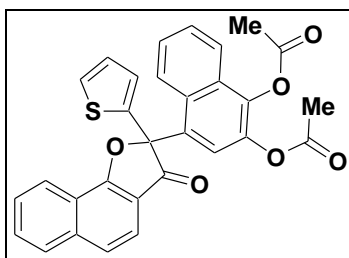

**Sample preparation** : A solution of compound **5g** (30 mg) in warm  $\text{CH}_2\text{Cl}_2$  (10 mL) was placed in a tube (10 mL). EtOAc (2 mL) was added slowly to the vial with a dropper. The vial was closed with little cotton and kept at room temperature for 2 days. Then, colorless prisms were observed.

**Crystal measurement** : X-ray crystal structures were determined with a Bruker Enraf-Nonius single-crystal diffractometer (CAD4, Kappa CCD). Thermal ellipsoids are drawn at 50% probability level.

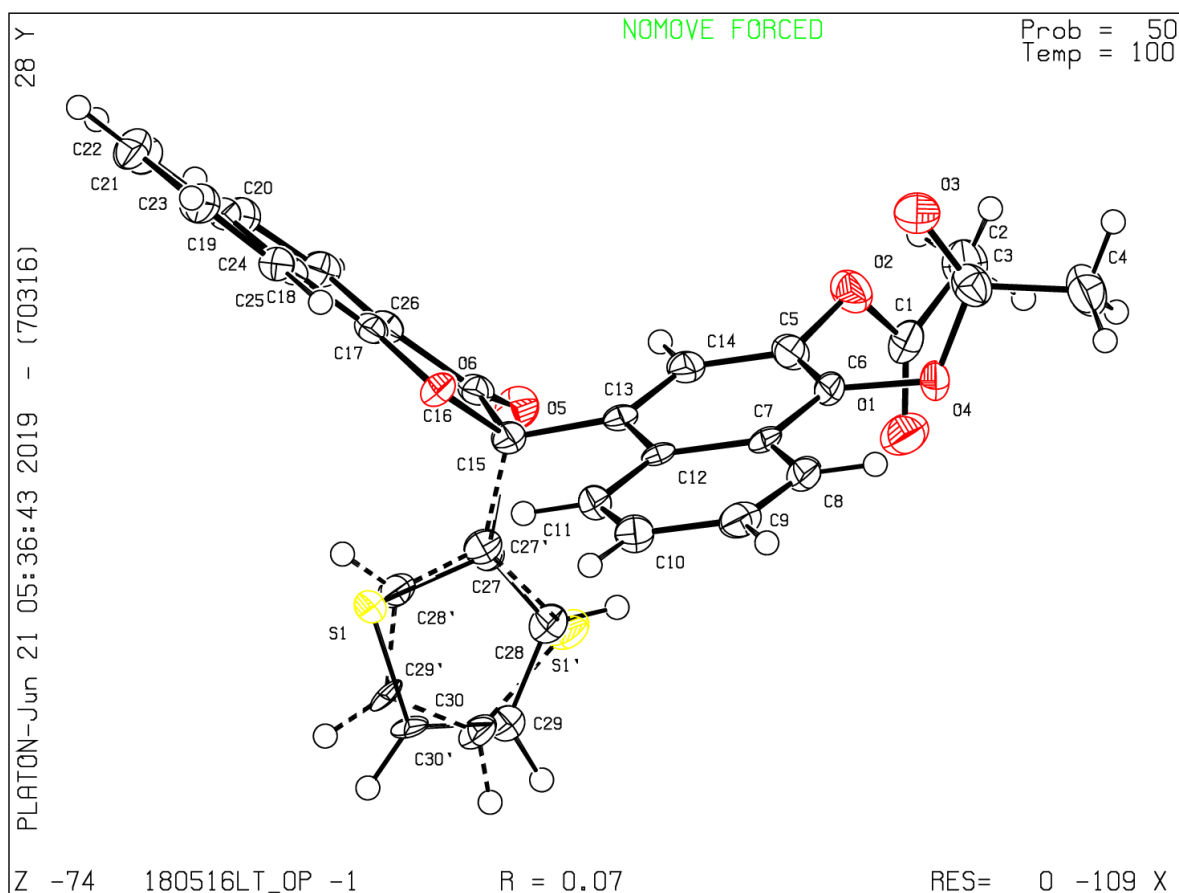

|                                   |                                                                                                                           |
|-----------------------------------|---------------------------------------------------------------------------------------------------------------------------|
| Empirical formula                 | C <sub>30</sub> H <sub>20</sub> O <sub>6</sub> S                                                                          |
| Formula weight                    | 508.52                                                                                                                    |
| Temperature                       | 100(2) K                                                                                                                  |
| Wavelength                        | 0.71073 Å                                                                                                                 |
| Crystal system                    | Triclinic                                                                                                                 |
| Space group                       | P-1                                                                                                                       |
| Unit cell dimensions              | a = 7.9733(10) Å      α = 84.455(7)°.<br>b = 10.7024(14) Å      β = 80.196(6)°.<br>c = 14.7112(19) Å      γ = 74.507(6)°. |
| Volume                            | 1190.3(3) Å <sup>3</sup>                                                                                                  |
| Z                                 | 2                                                                                                                         |
| Density (calculated)              | 1.419 Mg/m <sup>3</sup>                                                                                                   |
| Absorption coefficient            | 0.182 mm <sup>-1</sup>                                                                                                    |
| F(000)                            | 528                                                                                                                       |
| Crystal size                      | 0.26 x 0.25 x 0.23 mm <sup>3</sup>                                                                                        |
| Theta range for data collection   | 1.407 to 26.569°.                                                                                                         |
| Index ranges                      | -9 ≤ h ≤ 9, -13 ≤ k ≤ 13, -18 ≤ l ≤ 18                                                                                    |
| Reflections collected             | 17883                                                                                                                     |
| Independent reflections           | 4778 [R(int) = 0.0437]                                                                                                    |
| Completeness to theta = 25.242°   | 98.0 %                                                                                                                    |
| Absorption correction             | Semi-empirical from equivalents                                                                                           |
| Max. and min. transmission        | 0.9485 and 0.8566                                                                                                         |
| Refinement method                 | Full-matrix least-squares on F <sup>2</sup>                                                                               |
| Data / restraints / parameters    | 4778 / 549 / 382                                                                                                          |
| Goodness-of-fit on F <sup>2</sup> | 1.115                                                                                                                     |
| Final R indices [I > 2σ(I)]       | R1 = 0.0715, wR2 = 0.1944                                                                                                 |
| R indices (all data)              | R1 = 0.0953, wR2 = 0.2046                                                                                                 |
| Extinction coefficient            | n/a                                                                                                                       |
| Largest diff. peak and hole       | 0.671 and -0.375 e.Å <sup>-3</sup>                                                                                        |

## X-ray crystal data of compound 9d (CCDC 1894544)

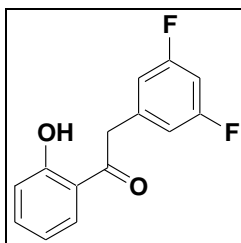

**Sample preparation** : A solution of compound **9d** (30 mg) in warm  $\text{CH}_2\text{Cl}_2$  (10 mL) was placed in a tube (10 mL). EtOAc (2 mL) was added slowly to the vial with a dropper. The vial was closed with little cotton and kept at room temperature for 2 days. Then, colorless prisms were observed.

**Crystal measurement** : X-ray crystal structures were determined with a Bruker Enraf-Nonius single-crystal diffractometer (CAD4, Kappa CCD). Thermal ellipsoids are drawn at 50% probability level.

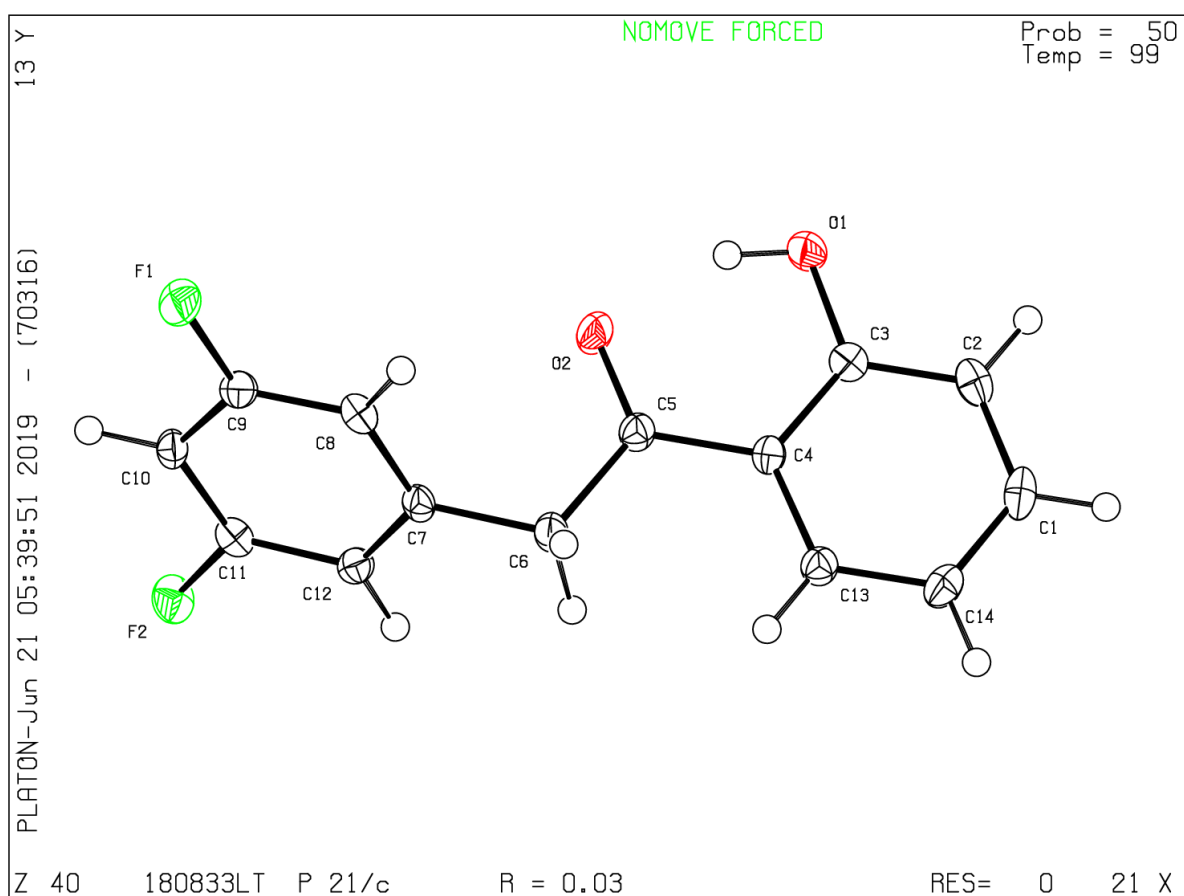

|                                   |                                                                                                          |
|-----------------------------------|----------------------------------------------------------------------------------------------------------|
| Empirical formula                 | C <sub>14</sub> H <sub>10</sub> F <sub>2</sub> O <sub>2</sub>                                            |
| Formula weight                    | 248.22                                                                                                   |
| Temperature                       | 99(2) K                                                                                                  |
| Wavelength                        | 0.71073 Å                                                                                                |
| Crystal system                    | Monoclinic                                                                                               |
| Space group                       | P2 <sub>1</sub> /c                                                                                       |
| Unit cell dimensions              | a = 7.9744(3) Å      α = 90°.<br>b = 20.0084(6) Å      β = 103.779(2)°.<br>c = 7.1794(2) Å      γ = 90°. |
| Volume                            | 1112.54(6) Å <sup>3</sup>                                                                                |
| Z                                 | 4                                                                                                        |
| Density (calculated)              | 1.482 Mg/m <sup>3</sup>                                                                                  |
| Absorption coefficient            | 0.121 mm <sup>-1</sup>                                                                                   |
| F(000)                            | 512                                                                                                      |
| Crystal size                      | 0.20 x 0.19 x 0.08 mm <sup>3</sup>                                                                       |
| Theta range for data collection   | 2.036 to 26.406°.                                                                                        |
| Index ranges                      | -9 ≤ h ≤ 9, -24 ≤ k ≤ 25, -8 ≤ l ≤ 8                                                                     |
| Reflections collected             | 15302                                                                                                    |
| Independent reflections           | 2259 [R(int) = 0.0199]                                                                                   |
| Completeness to theta = 25.242°   | 99.5 %                                                                                                   |
| Absorption correction             | Semi-empirical from equivalents                                                                          |
| Max. and min. transmission        | 0.7454 and 0.7176                                                                                        |
| Refinement method                 | Full-matrix least-squares on F <sup>2</sup>                                                              |
| Data / restraints / parameters    | 2259 / 0 / 166                                                                                           |
| Goodness-of-fit on F <sup>2</sup> | 1.052                                                                                                    |
| Final R indices [I > 2σ(I)]       | R <sub>1</sub> = 0.0323, wR <sub>2</sub> = 0.0800                                                        |
| R indices (all data)              | R <sub>1</sub> = 0.0356, wR <sub>2</sub> = 0.0822                                                        |
| Extinction coefficient            | n/a                                                                                                      |
| Largest diff. peak and hole       | 0.261 and -0.175 e.Å <sup>-3</sup>                                                                       |
